# Supplementary material for: Assessing corporate emissions reduction targets against national transition plans
Source: Research Square preprint supplement (doi:10.21203/rs.3.rs-8460132/v1), 2026-01-21
Supplement: Supplementary file 1 [file c42ba6a88e75488d97f1573b.xlsx]

## Sheet: ReadMe
	Read me: Assessing corporate emissions reduction targets against national transition plans
	Overview
	Authors	Adrien Rose, Saphira Rekker, Abhinav Jindal, Gireesh Shrimali
	Contact	Adrien Rose, a.p.rose@lse.ac.uk
	Purpose	This dataset underpins the analysis in Assessing corporate emissions reduction targets against national transition plans. It compiles national decarbonisation pathways for the power sector in 19 countries (out of 52 countries reviewed) and company-level targets for 65 major power producers. All the data used in the analysis comes from public sources.
	Last updated	This document was last updated in December 2025. The data was last updated in October 17, 2025.
	Table of content
	Sheet name	Description
	📊 Results	Tables and figures included in the Results section of the paper
		Figure 1. Evolution of the carbon intensity from power generation in 19 countries based on NDC-aligned national sectoral pathways and 1.5 °C-aligned national sectoral pathways.
		(See R Script) Figure 2. Corporate carbon budget consumption under national and global pathways using the SDA.
		Table 1. Corporate carbon budget consumption aggregated at the country level under national and global pathways. Supplementary Table 4
		Table 2. Estimated year in which companies fully consume their carbon budget, aggregated at the country level.
		Supplementary Table 1
		Supplementary Table 2. Supplementary Table 3. And additional indicators.
		Table not included in the paper. Estimated year in which each company fully consumes its carbon budget under each pathway.
	📝Analysis	Analysis, raw data, and sources for all companies covered in the paper
	📈 Pathways	Key indicators for all the pathways used as benchmarks in the paper		Word count
	📈 1.5 CA	Key indicators, raw data, and source for all the 1.5 National Pathways from Climate Analytics		Introduction	692
	📈 Tabs with ISO Code +"NTP"	Key indicators, raw data, and sources for the specified country.		Results	120
	📊 Multinationals - SSE Example	Key indicators, raw data, and sources for the assessment of SSE across the United Kingdom and Ireland			376
	📝 Country coverage	List of countries analysed and key characteristics			734
	Lists	Working sheet			91
				Discussion	1079
				Total	3092

## Sheet: Results
	Tables and Figures
	Figure 1. Evolution of the carbon intensity from power generation in 19 countries based on NDC-aligned national sectoral pathways and 1.5 °C-aligned national sectoral pathways.
	Figure 2. Corporate carbon budget consumption under national and global pathways using the SDA.
	See R script.
	Table 1. Corporate carbon budget consumption aggregated at the country level under national and global pathways. Supplementary Table 4. And additional metrics.
	Country	% of national power emission (2023)	% of national power generation (2023)	Share of carbon budget consumed (SDA)				Share of carbon budget consumed (CBD)							Difference SDA - CBD
Code				NDC & National Plan	CA 1.5 national pathway	IEA Net Zero (global)		NDC & National Plan	CA 1.5 national pathway	IEA Net Zero (global)					NDC & National Plan	IEA Net Zero (global)	CA 1.5 national pathway
GBR	British companies	0.240594	0.444685	0.988833	0.817652	0.521106		0.741967	0.750461	0.249276					0.246866	0.27183	0.067191				G1
AUS	Australian companies	0.614957	0.424442	2.27963	4.34832	1.97534		3.41443	6.47884	4.1942					-1.13479	-2.21886	-2.13052				G2
IND	Indian companies	0.296369	0.253779	1.2949	1.62671	1.78595		1.40553	2.02902	2.53273					-0.110625	-0.746786	-0.402305				G3
ZAF	South African companies	1.1094	0.819021	1.13476	4.0392	1.9275		1.51774	4.95876	4.88422					-0.382979	-2.95671	-0.919564				G2
PHL	Philippine companies	0.588335	0.72721	1.28813	7.8278	6.35512		0.949128	3.3395	3.61524					0.339	2.73988	4.48831				G4
MYS	Malaysian companies	0.548497	0.671906	0.963135	1.2304	1.17541		0.875621	1.06902	1.19798					0.0875136	-0.0225673	0.161378				G5
CAN	Canadian companies	0.336341	0.500929	4.28717	8.16315	3.83483		20.7622	9.80231	1.05042					-16.475	2.78441	-1.63916				G2
POL	Polish companies	0.692475	0.580833	0.870353	1.75282	1.47977		1.24085	4.94985	2.57365					-0.370502	-1.09388	-3.19703				G6
MEX	Mexican companies	0.75829	0.788198	1.4331	3.27543	1.95362		1.97237	5.67178	3.16808					-0.539271	-1.21446	-2.39636				G7
SRB	Serbian companies	0.992064	0.886393	1.66602	3.4901	3.79537		1.82615	4.63599	7.09178					-0.160135	-3.29641	-1.14589				G4
KOR	South Korean companies	0.547518	0.633692	0.992151	1.13152	1.21213		1.09616	1.23236	1.27263					-0.10401	-0.0605008	-0.100841				G8
THA	Thai companies	0.623719	0.729431	1.22877	1.54665	1.61617		1.13115	1.6158	1.48286					0.0976227	0.133308	-0.0691451				G9
ARG	Argentine companies	0.490869	0.465953	2.32628	3.58471	4.46689		2.45441	4.67085	3.06775					-0.128132	1.39914	-1.08614				G4
JPN	Japanese companies	0.456385	0.477006	1.215	2.42218	1.42336		1.23927	2.43865	1.56328					-0.0242691	-0.139922	-0.0164716				G10
IDN	Indonesian companies	1.00568	0.922191	1.00359	10.3896	3.98096		1.03452	10.036	6.19368					-0.0309255	-2.21273	0.3536				G2
ESP	Spanish companies	0.429836	0.54012	1.71293	0.982176	0.628607		1.70452	0.872727	0.297105					0.00841278	0.331502	0.109449				G5
NLD	Dutch companies	0.32289	0.334315	1.04389	NA	0.740339		1.30956	NA	0.530149					-0.265678	0.21019	NA				G11
FRA	French companies	0.860144	0.70693	0.72669	1.01981	1.43957		0.748246	1.66925	0.18448					-0.0215557	1.25509	-0.649435				G4
TWN	Taiwanese companies	0.510863	0.618487	1.66633	NA	2.26892		1.63982	NA	2.69554					0.0265069	-0.426615	NA				G7
	World	0.144984	0.134338	NA	NA	1.71992		NA	NA	2.54191					NA	-0.821993	NA
	Table 2. Estimated year in which companies fully consume their carbon budget, aggregated at the country level.
	Country	% of national power emission (2023)	% of national power generation (2023)	Estimated year in which the company carbon budget will be fully consumed
				NDC & National Plan	CA 1.5 national pathway	IEA Net Zero (global)
GBR	British companies	0.240594	0.444685	Aligned	Aligned	Aligned
AUS	Australian companies	0.614957	0.424442	2032	2026	2033
IND	Indian companies	0.296369	0.253779	2030	2028	2027
ZAF	South African companies	1.1094	0.819021	2041	2026	2032
PHL	Philippine companies	0.588335	0.72721	2045	2025	2026
MYS	Malaysian companies	0.548497	0.671906	Aligned	2028	2028
CAN	Canadian companies	0.336341	0.500929	2027	2024	2031
POL	Polish companies	0.692475	0.580833	Aligned	2030	2032
MEX	Mexican companies	0.75829	0.788198	2037	2026	2031
SRB	Serbian companies	0.992064	0.886393	2039	2030	2031
KOR	South Korean companies	0.547518	0.633692	Aligned	2036	2035
THA	Thai companies	0.623719	0.729431	2033	2030	2030
ARG	Argentine companies	0.490869	0.465953	2034	2031	2029
JPN	Japanese companies	0.456385	0.477006	2035	2027	2032
IDN	Indonesian companies	1.00568	0.922191	2050	2026	2029
ESP	Spanish companies	0.429836	0.54012	2024	Aligned	Aligned
NLD	Dutch companies	0.32289	0.334315	2036	NA	Aligned
FRA	French companies	0.860144	0.70693	Aligned	2046	2033
TWN	Taiwanese companies	0.510863	0.618487	2033	NA	2031
	World	0.144984	0.134338	NA	NA	2031
	Supplementary Table 1.
	Plan	Country	Period	Increased ambition available	1.5 National Pathways from Climate Analytics available	Period covered in the 1.5 CA pathway	Period to use	Groupe
	Clean Power 2030 Action Plan	GBR	2023-2030		Yes	2021-2050	2021-2030	G1
	Electricity and Energy Sector Plan	AUS	2025-2050	X	Yes	2021-2050	2021-2050	G2
	National Electricity Plan	IND	2020-2032		Yes	2021-2050	2020-2032	G3
	Draft sectoral emission targets & Integrated Resource Plan 2023	ZAF	2025-2050		Yes	2021-2050	2021-2050	G2
	Energy Plan 2023-2050 Volume 1	PHL	2023-2050	X	Yes	2019-2050	2019-2050	G4
	Nationally Determined Contribution Roadmap and Action Plan	MYS	2019-2030	X	Yes	2019-2050	2019-2030	G5
	Canada's Energy Future 2023	CAN	2021-2050		Yes	2021-2050	2021-2050	G2
	Energy Policy of Poland until 2040 (EPP2040)	POL	2020-2040		Yes	2021-2050	2020-2040	G6
	Evaluation of Decarbonization Strategies for the Update of Mexico’s National Climate Change Strategy	MEX	2020-2050	X	Yes	2021-2050	2020-2050	G7
	Low Carbon Development Strategy for the Period 2023- 2030 with projections until 2050	SRB	2020-2050	X	Yes	2019-2050	2019-2050	G4
	11th Basic Plan for Power Supply and Demand (2024-2038)	KOR	2024-2038		Yes	2019-2050	2019-2038	G8
	Power Development Plan 2024-2037	THA	2024-2037		Yes	2019-2050	2019-2037	G9
	National Energy Plan for the energy transition by 2030 & Guidelines and scenarios for the energy transition by 2050	ARG	2023-2050	X	Yes	2019-2050	2019-2050	G4
	Outlook for Energy Supply and Demand in FY2040	JPN	2023-2040		Yes	2021-2050	2021-2040	G10
	National Electricity Plan (RUKN) 2025	IDN	2025-2060		Yes	2021-2050	2021-2050	G2
	National Energy and Climate Plan	ESP	2023-2030		Yes	2019-2050	2019-2030	G5
	National Energy System Plan 2023	NLD	2023-2050		No	NA	2022-2050	G11
	National Energy System Plan 2024	FRA	2020-2050		Yes	2019-2050	2019-2050	G4
	2050 Net Zero Roadmap	TWN	2020-2050				2020-2050	G7
	Plan not suitable to apply the SDA with limited assumptions, or no plan	CHN, USA, IRN, DEU, EGY, SAU, IRQ, KAZ, UZB, ITA, ARE, PAK, BGD, BRA, GBR, DZA, KWT, CHL, ISR, CZE, QAT, BHR, SGP, MAR, HKG, COL, TKM, LBY
	Suitable plan but no corporate reporting	VNM, UKR, OMN, NGA
	Supplementary Table 2. Supplementary Table 3. And additional indicators.
	Company name	Country	% of national power emission (2023)	% of national power generation (2023)	Share of carbon budget consumed			Company name	Share of carbon budget consumed under the Cumulative Benchmark Divergence			Difference SDA - CBD					Firms with high emissions intensity operating in countries with high emission intensity benefit from the use of a national pathway while firms with low and average emissions intensity operating in countries with an intensity below the global average benefit from the use of a national pathway. Firms with high intensity operating in low carbon economies benefit from the use of a global pathway.
					NDC & National Plan	CA 1.5 national pathway	IEA Net Zero (global)		NDC & National Plan	CA 1.5 national pathway	IEA Net Zero (global)	NDC & National Plan	IEA Net Zero (global)	CA 1.5 national pathway	Difference	Company intensity	Country intensity	Global average
G2	AGL	AUS	0.231202	0.139801	1.26778	2.50944	1.08714	AGL	2.41274	4.73158	3.05488	-1.14495	-1.96773	-2.22214	0.822779	0.94	0.567875	0.46003
G2	EnergyAustralia	AUS	0.109813	0.0619052	0.994843	2.03282	0.936924	EnergyAustralia	1.73518	3.60923	2.14248	-0.740341	-1.20556	-1.57641	0.465217	1.03651	0.567875	0.46003
G2	Origin	AUS	0.0850523	0.0525714	2.02749	4.09788	1.78235	Origin	2.83909	5.76366	3.61556	-0.811601	-1.83321	-1.66577	1.02161	0.85	0.567875	0.46003
G2	Stanwell	AUS	0.119608	0.0711179	4.82955	8.6992	4.07031	Stanwell	7.77239	14.2173	9.5737	-2.94284	-5.50338	-5.51813	2.56055	0.944563	0.567875	0.46003
G2	AlintaEnergy	AUS	0.0162858	0.03713	2.12196	5.57587	2.22765	AlintaEnergy	1.28071	2.46405	1.63778	0.841246	0.589877	3.11182	0.25137	0.258	0.567875	0.46003
G2	CS Energy	AUS	0.0525946	0.0315148	4.63027	8.40112	3.91695	CS Energy	7.4257	14.1036	9.19431	-2.79544	-5.27736	-5.70248	2.48192	0.983	0.567875	0.46003
G2	Hydro Tasmania	AUS	0.000401099	0.0304017				Hydro Tasmania	0.182525	0.365021	0.237864	-0.182525	-0.237864	-0.365021	0.055339	0.00425105	0.567875	0.46003
G1	SSE - UK	GBR	0.0819798	0.0737199	1.07344	1.01139	0.698665	SSE - UK	1.39058	1.53587	0.495307	-0.317148	0.203358	-0.524478	-0.520507	0.234497	0.187874	0.46003
G1	RWE - UK	GBR	0.156298	0.136433	1.1294	0.925961	0.663296	RWE - UK	1.51731	1.657	0.550237	-0.387913	0.113059	-0.731034	-0.500972	0.285644	0.187874	0.46003
G1	EDF - UK	GBR	0.000155762	0.1897				EDF - UK	0.0306451	0.0267835	0.00907938				0	0.002	0.187874	0.46003
G1	Drax	GBR	0.00216059	0.0448314				Drax	0.126809	0.142023	0.0453227				0	0.023	0.187874	0.46003
G3	Tata Power	IND	0.0202772	0.0199193	1.14034	1.1854	1.42901	Tata Power	1.17551	1.54168	2.09939	-0.0351657	-0.670381	-0.356279	0.635215	0.785806	0.71	0.46003
G3	NTPC	IND	0.240974	0.204374	1.30701	1.68137	1.83112	NTPC	1.41885	2.05579	2.55256	-0.111838	-0.721435	-0.374419	0.609597	0.84364	0.71	0.46003
G3	Adani Power	IND	0.0351175	0.0294855	1.31925	1.637	1.78705	Adani Power	1.47099	2.18327	2.68659	-0.151745	-0.899541	-0.546277	0.747796	0.849727	0.71	0.46003
G2	Eskom	ZAF	1.1094	0.819021	1.13476	4.0392	1.9275	Eskom	1.51774	4.95876	4.88422	-0.382979	-2.95671	-0.919564	2.57374	0.93908	0.801708	0.46003
G4	Meralco	PHL	0.0900966	0.11313	1.86182	14.6756	11.8228	Meralco	1.22947	4.23658	4.52689	0.632348	7.29587	10.439	-6.66352	0.500041	0.651198	0.46003
G4	San Miguel Corporation	PHL	0.170356	0.126389	0.768458	2.85059	2.42699	San Miguel Corporation	0.878996	3.23433	3.65722	-0.110537	-1.23023	-0.383739	1.11969	0.926003	0.651198	0.46003
G4	Aboitiz	PHL	0.230472	0.302946	1.51874	9.62447	7.67524	Aboitiz	1.20807	4.42431	4.69356	0.310677	2.98168	5.20016	-2.671	0.435	0.651198	0.46003
G4	FirstGen	PHL	0.0974105	0.184745	0.488806	2.29611	1.91967	FirstGen	0.323266	1.06549	1.21085	0.165541	0.708818	1.23062	-0.543278	0.295508	0.651198	0.46003
G5	TNB	MYS	0.340925	0.379216	1.02434	1.26454	1.20353	TNB	0.960752	1.12078	1.25733	0.0635891	-0.0537926	0.143761	0.117382	0.5488	0.579676	0.46003
G5	Malakoff	MYS	0.14433	0.109213	1.12999	1.41657	1.25547	Malakoff	1.35648	1.7633	1.98628	-0.226489	-0.730809	-0.346721	0.50432	0.905808	0.579676	0.46003
G5	Sarawak Energy	MYS	0.0632422	0.183477	0.560839	0.83528	0.920648	Sarawak Energy	0.362146	0.476056	0.533982	0.198693	0.386666	0.359223	-0.187973	0.202505	0.579676	0.46003
G2	Fortis	CAN	0.0751076	0.024784	1.14188	3.15397	1.24322	Fortis	46.709	22.3825	1.61062	-45.5671	-0.367404	-19.2285	-45.1997	0.522011	0.0858359	0.46003
G2	Ontario Power Generation	CAN	0.0323199	0.119553				Ontario Power Generation	3.00169	1.44016	0.0968986	-3.00169	-0.0968986	-1.44016	-2.90479	0.0366131	0.0858359	0.46003
G2	Hydro-Québec	CAN	0.00101731	0.280011				Hydro-Québec	0.654144	0.306858	0.0252769	-0.654144	-0.0252769	-0.306858	-0.628867	0.0013	0.0858359	0.46003
G2	Nova Scotia Power	CAN	0.0471565	0.0172832	3.46611	9.10374	4.04349	Nova Scotia Power	142.299	66.5188	5.36816	-138.833	-1.32467	-57.415	-137.509	0.5572	0.0858359	0.46003
G2	SaskPower	CAN	0.130056	0.0388825	3.29969	8.82705	3.31779	SaskPower	141.149	68.2323	7.95686	-137.849	-4.63907	-59.4053	-133.21	0.57536	0.0858359	0.46003
G2	Transalta	CAN	0.0506838	0.0204154	0.875759	2.38533	6.26964	Transalta	40.7923	17.4302	8.50175	-39.9166	-2.23211	-15.0449	-37.6844	0.4	0.0858359	0.46003
G6	PGE	POL	0.426723	0.345211	0.976711	2.01244	1.58634	PGE	1.38482	5.65764	2.92123	-0.408108	-1.3349	-3.6452	0.926787	0.87	0.5282	0.46003
G6	Enea	POL	0.151804	0.129523	0.843986	1.67356	1.32467	Enea	1.13791	4.43237	2.31552	-0.293926	-0.990845	-2.75881	0.696919	0.793	0.5282	0.46003
G6	Tauron	POL	0.0846414	0.0770325	0.602931	1.11978	0.895685	Tauron	0.759426	2.67675	1.4218	-0.156494	-0.526111	-1.55697	0.369616	0.767	0.5282	0.46003
G6	Energa	POL	0.0139022	0.0197628	0.901582	2.2911	6.9187	Energa	0.80489	3.27402	2.31875	0.0966924	4.59995	-0.982924	-4.50326	0.625484	0.5282	0.46003
G6	ZE PAK	POL	0.0154046	0.00930374	1.19625	2.17291	1.7244	ZE PAK	2.05121	7.85299	4.04909	-0.854969	-2.32468	-5.68008	1.46971	0.87	0.5282	0.46003
G7	CFE	MEX	0.698867	0.698867	1.52651	3.50845	2.09319	CFE	2.13969	6.22026	3.4569	-0.613185	-1.36372	-2.71181	0.750532	0.472586	0.415693	0.46003
G7	Naturgy Mexico	MEX	0.030788	0.04105	0.803376	1.74967	1.03996	Naturgy Mexico	0.761755	2.08245	1.15789	0.041621	-0.117932	-0.332779	0.159553	0.39375	0.415693	0.46003
G7	Iberdrola Mexico	MEX	0.028635	0.0482808	0.446399	0.882903	0.516314	Iberdrola Mexico	0.353018	0.784832	0.460378	0.0933809	0.0559363	0.0980713	0.0374447	0.291	0.415693	0.46003
G4	Elektroprivreda Srbije (EPS a.d.)	SRB	0.992064	0.886393	1.66602	3.4901	3.79537	Elektroprivreda Srbije (EPS a.d.)	1.82615	4.63599	7.09178	-0.160135	-3.29641	-1.14589	3.13628	0.85206	0.700919	0.46003
G8	KEPCO	KOR	0.547518	0.633692	0.992151	1.02065	1.21213	KEPCO	1.09616	1.23236	1.27263	-0.10401	-0.0605008	-0.211711	-0.0435094	0.396889	0.397864	0.46003
G9	EGAT	THA	0.331078	0.355419	1.30341	1.54442	1.62511	EGAT	1.27502	1.83857	1.67654	0.0283897	-0.0514257	-0.294154	0.0798154	0.539402	0.473503	0.46003
G9	Ratch Group	THA	0.0475876	0.0740282	0.754962	0.960247	0.992297	Ratch Group	0.61547	0.83182	0.760247	0.139493	0.232049	0.128427	-0.0925569	0.390734	0.473503	0.46003
G9	Banpu Power	THA	0.0891802	0.0642309	1.23435	1.20387	1.29005	Banpu Power	1.74124	2.34977	2.14613	-0.506891	-0.85608	-1.1459	0.349189	0.780204	0.473503	0.46003
G9	GULF	THA	0.107364	0.165189	1.20463	1.9825	2.01247	GULF	0.955394	1.384	1.2988	0.24924	0.713671	0.598507	-0.464431	0.372739	0.473503	0.46003
G9	GPSC Group	THA	0.0485104	0.070564	1.41893	2.17198	2.19694	GPSC Group	1.00449	1.46209	1.336	0.414443	0.860938	0.709882	-0.446495	0.453	0.473503	0.46003
G4	AES Argentina	ARG	0.0340066	0.0408159	0.627532	0.678264	0.849567	AES Argentina	0.698158	1.07149	0.682226	-0.0706256	0.167341	-0.393228	-0.237966	0.245509	0.311881	0.46003
G4	Central Puerto	ARG	0.185976	0.14187	3.00289	4.75684	5.93174	Central Puerto	3.51295	6.88391	4.58004	-0.510059	1.3517	-2.12707	-1.86176	0.513	0.311881	0.46003
G4	Pampa Energia	ARG	0.142499	0.146145	2.60534	4.47816	5.63592	Pampa Energia	2.59705	5.07529	3.36673	0.00828925	2.26918	-0.597129	-2.26089	0.359703	0.311881	0.46003
G4	YPF Luz	ARG	0.0860494	0.0838052	1.74958	3.15901	4.0909	YPF Luz	1.5061	2.7057	1.86159	0.243482	2.22931	0.453315	-1.98583	0.367927	0.311881	0.46003
G4	Albanesi	ARG	0.022962	0.0160009	4.26965	6.82039	8.38638	Albanesi	5.14444	10.2437	6.92874	-0.874786	1.45764	-3.42327	-2.33242	0.522858	0.311881	0.46003
G4	EPEC	ARG	0.0193758	0.0185357	2.60947	4.05529	4.98503	EPEC	2.80527	5.42053	3.55265	-0.195808	1.43237	-1.36524	-1.62818	0.4	0.311881	0.46003
G4	Enel Argentina	ARG	1.35057e-10	0.0187801	0.479988	0.392753	0.47708	Enel Argentina	0.545698	0.748274	0.442489	-0.0657107	0.0345909	-0.355521	-0.100302	0.374	0.311881	0.46003
G10	JERA	JPN	0.229844	0.227977	1.28509	2.49556	1.55635	JERA	1.33386	2.56265	1.73805	-0.0487721	-0.181699	-0.0670917	0.132927	0.515311	0.484263	0.46003
G10	Kansai Electric Power Group	JPN	0.042389	0.0954345	0.885022	1.85976	1.28111	Kansai Electric Power Group	0.517773	1.01939	0.752696	0.367249	0.528414	0.840376	-0.161165	0.282932	0.484263	0.46003
G10	Tohoku	JPN	0.0675025	0.0569449	1.26831	2.59615	1.36041	Tohoku	1.45234	2.96398	1.68562	-0.184035	-0.325214	-0.367823	0.141179	0.536598	0.484263	0.46003
G10	JPower	JPN	0.0673425	0.0519117	1.10702	2.21356	1.15947	JPower	1.67972	3.3611	1.94379	-0.572705	-0.784321	-1.14755	0.211616	0.681879	0.484263	0.46003
G10	Chugoku Electric Power Group	JPN	0.0493072	0.0447377	1.35537	2.78199	1.45937	Chugoku Electric Power Group	1.48482	2.96761	1.77378	-0.129459	-0.314411	-0.18562	0.184952	0.536	0.484263	0.46003
G10	Hokuriku Electric Power Group	JPN	0.0262932	0.0235912	0.981881	1.85991	1.29501	Hokuriku Electric Power Group	1.44603	2.71584	2.11302	-0.464148	-0.818015	-0.855925	0.353867	0.600584	0.484263	0.46003
G2	PLN	IDN	1.00568	0.922191	1.00359	10.3896	3.98096	PLN	1.03452	10.036	6.19368	-0.0309255	-2.21273	0.3536	2.1818	0.733442	0.749177	0.46003
G5	Endesa	ESP	0.244262	0.215352	2.03629	1.1781	0.792721	Endesa	2.28648	1.17398	0.400275	-0.250194	0.392446	0.00411736	-0.642639	0.205	0.0874	0.46003
G5	Iberdrola Espana	ESP	0.0790588	0.230736	0.866027	0.495092	0.28085	Iberdrola Espana	0.639686	0.330328	0.111473	0.226342	0.169377	0.164765	0.0569643	0.069	0.0874	0.46003
G5	Naturgy	ESP	0.106515	0.0940323	2.2363	1.28308	0.890032	Naturgy	2.97311	1.52896	0.523289	-0.736808	0.366743	-0.245878	-1.10355	0.243611	0.0874	0.46003
G11	RWE NDL	NLD	0	0	1.03872	NA	0.716452	RWE NDL	1.95075	NA	0.78312	-0.912022	-0.0666682	#VALUE!	-0.845354	0.405703	0.250878	0.46003
G11	Eneco	NLD	0	0	1.21095	NA	0.940024	Eneco	0.491107	NA	0.197575	0.719847	0.742449	#VALUE!	-0.0226023	0.083328	0.250878	0.46003
G11	Vattenfal	NLD	0	0	0.999728	NA	0.724643	Vattenfal	1.38873	NA	0.570443	-0.389002	0.1542	#VALUE!	-0.543203	0.356522	0.250878	0.46003
G4	EDF	FRA	0.860144	0.70693	0.72669	1.01981	1.43957	EDF	0.748246	1.66925	0.18448	-0.0215557	1.25509	-0.649435	-1.27665	0.071521	0.071521	0.46003
G7	Taiwan Power Company	TWN	0	0	1.66633	NA	2.26892	Taiwan Power Company	1.63982	NA	2.69554	0.0265069	-0.426615	#VALUE!	0.453122	0.51949	0.49727	0.46003
												19	26	15
	Table not included in the paper. Estimated year in which each company fully consumes its carbon budget under each pathway.
	Companies - Only electricity generation is analysed	Country	% of national emission (2023)	% of national generation (2023)	Estimated year in which the company carbon budget will be fully consumed
					NDC & National Plan	IEA Net Zero (global)	CA 1.5 national pathway
	AGL	AUS	0.231202	0.139801	2032	2033	2026
	EnergyAustralia	AUS	0.109813	0.0619052	Aligned	Aligned	2026
	Origin	AUS	0.0850523	0.0525714	2032	2032	2025
	Stanwell	AUS	0.119608	0.0711179	2031	2031	2026
	AlintaEnergy	AUS	0.0162858	0.03713	2032	2031	2025
	CS Energy	AUS	0.0525946	0.0315148	2031	2032	2026
	Hydro Tasmania	AUS	0.000401099	0.0304017	2025	2025	2025
	SSE - UK	GBR	0.0819798	0.0737199	2029	Aligned	2030
	RWE - UK	GBR	0.156298	0.136433	2028	Aligned	Aligned
	EDF - UK	GBR	0.000155762	0.1897	Aligned	Aligned	Aligned
	Drax	GBR	0.00216059	0.0448314	Aligned	Aligned	Aligned
	Tata Power	IND	0.0202772	0.0199193	2031	2028	2030
	NTPC	IND	0.240974	0.204374	2030	2027	2028
	Adani Power	IND	0.0351175	0.0294855	2030	2028	2029
	Eskom	ZAF	1.1094	0.819021	2041	2032	2026
	Meralco	PHL	0.0900966	0.11313	2041	2024	2023
	San Miguel Corporation	PHL	0.170356	0.126389	Aligned	2029	2028
	Aboitiz	PHL	0.230472	0.302946	2044	2027	2026
	FirstGen	PHL	0.0974105	0.184745	Aligned	2031	2029
	TNB	MYS	0.340925	0.379216	2030	2028	2027
	Malakoff	MYS	0.14433	0.109213	2029	2028	2027
	Sarawak Energy	MYS	0.0632422	0.183477	Aligned	Aligned	Aligned
	Fortis	CAN	0.0751076	0.024784	2038	2035	2025
	Ontario Power Generation	CAN	0.0323199	0.119553	2021	2024	2021
	Hydro-Québec	CAN	0.00101731	0.280011	2021	2021	2021
	Nova Scotia Power	CAN	0.0471565	0.0172832	2032	2032	2025
	SaskPower	CAN	0.130056	0.0388825	2032	2033	2025
	Transalta	CAN	0.0506838	0.0204154	Aligned	2028	2026
	PGE	POL	0.426723	0.345211	Aligned	2032	2029
	Enea	POL	0.151804	0.129523	Aligned	2033	2030
	Tauron	POL	0.0846414	0.0770325	Aligned	Aligned	2031
	Energa	POL	0.0139022	0.0197628	Aligned	2024	2027
	ZE PAK	POL	0.0154046	0.00930374	2032	2025	2023
	CFE	MEX	0.698867	0.698867	2037	2031	2025
	Naturgy Mexico	MEX	0.030788	0.04105	Aligned	2039	2028
	Iberdrola Mexico	MEX	0.028635	0.0482808	Aligned	Aligned	Aligned
	Elektroprivreda Srbije (EPS a.d.)	SRB	0.992064	0.886393	2039	2031	2030
	KEPCO	KOR	0.547518	0.633692	Aligned	2035	2038
	EGAT	THA	0.331078	0.355419	2032	2030	2031
	Ratch Group	THA	0.0475876	0.0740282	Aligned	Aligned	Aligned
	Banpu Power	THA	0.0891802	0.0642309	2032	2032	2033
	GULF	THA	0.107364	0.165189	2034	2029	2029
	GPSC Group	THA	0.0485104	0.070564	2031	2027	2027
	AES Argentina	ARG	0.0340066	0.0408159	Aligned	Aligned	Aligned
	Central Puerto	ARG	0.185976	0.14187	2032	2028	2030
	Pampa Energia	ARG	0.142499	0.146145	2034	2028	2030
	YPF Luz	ARG	0.0860494	0.0838052	2033	2026	2028
	Albanesi	ARG	0.022962	0.0160009	2030	2027	2028
	EPEC	ARG	0.0193758	0.0185357	2034	2029	2031
	Enel Argentina	ARG	1.35057e-10	0.0187801	Aligned	Aligned	Aligned
	JERA	JPN	0.229844	0.227977	2034	2031	2027
	Kansai Electric Power Group	JPN	0.042389	0.0954345	Aligned	2035	2028
	Tohoku	JPN	0.0675025	0.0569449	2034	2033	2026
	JPower	JPN	0.0673425	0.0519117	2037	2036	2027
	Chugoku Electric Power Group	JPN	0.0493072	0.0447377	2033	2032	2026
	Hokuriku Electric Power Group	JPN	0.0262932	0.0235912	Aligned	2035	2029
	PLN	IDN	1.00568	0.922191	2050	2029	2026
	Endesa	ESP	0.244262	0.215352	2024	Aligned	2028
	Iberdrola Espana	ESP	0.0790588	0.230736	Aligned	Aligned	Aligned
	Naturgy	ESP	0.106515	0.0940323	2023	Aligned	2028
	RWE NDL	NLD	0	0	2036	Aligned	NA
	Eneco	NLD	0	0	2030	Aligned	NA
	Vattenfal	NLD	0	0	Aligned	Aligned	NA
	EDF	FRA	0.860144	0.70693	Aligned	2033	2046
	Taiwan Power Company	TWN	0	0	2033	2031	NA

## Sheet: Analysis
1	2	3	4	5	6	7	8	9	10	11	12	13	14	15	16	17	18	19	20	21	22	23	24	25	26	27	28	29	30	31	32	33	34	35	36	37	38	39	40	41	42	43	44	45	46	47	48	49	50
company	Indicators	country	sourcetargetsanddata	assumptions	targetyears	targetdescription	historyprojectioncutoff	d	NATIONAL PATHWAY			2008	2009	2010	2011	2012	2013	2014	2015	2016	2017	2018	2019	2020	2021	2022	2023	2024	2025	2026	2027	2028	2029	2030	2031	2032	2033	2034	2035	2036	2037	2038	2039	2040	2041	2042	2043	2044	2045
AGL	emissions in tCO2e (scope 1)	AUS	AGL Climate Transition Action Plan 2025; https://www.agl.com.au/content/dam/digital/agl/documents/about-agl/company-docs/250813-climate-transitionaction-plan-2025-final.pdf?srsltid=AfmBOoo4JlgwNOerm5yb1AEesVqzunphGZ22uiua38u_u7B-SKc8RmnN	Targets covered scope 1 and 2. The same rate was applied to scope 1 emissions. The short term targets of the group sometimes result in higher GHG emissions than what AGL would emit with its current intensity. It seems unrealistic that AGL increases its emissions to a higher level than the ones it had in the previous years, so we used the minimum between AGL's target and the estimate of AGL's futu…	2024;2035;2036	17% reduction in absolute scope 1&2 emissions by 2026 compared with 2019, 19% reduction in absolute scope 1&2 emissions in 2027 to 2034 compared with 2019; 52% reduction in absolute scope 1&2 emissions by 2035 compared with 2019; net zero by 2036																	42727000		40468100	39864460	35126520	3.28953e+07	30646560	3.15574e+07	3.27361e+07	3.40755e+07	34608870	34608870	34608870	34608870	34608870	34608870	20508960	20508960	0	0	0	0	0	0	0	0	0
AGL1	output (MWh)	AUS	ESG Data Center 2025 Environment; https://www.2025datacentre.agl.com.au/environment/greenhouse-energy/carbon-intensity-of-generation	Emissions intensity of electricity generation from operated assets from 2021 to 2025			2025																		42598000	42409000	38181000	34995000	31272000	3.22014e+07	3.34042e+07	3.4771e+07	3.60284e+07	3.96367e+07	4.26983e+07	4.49945e+07	4.7072e+07	5.03523e+07	5.32499e+07	6.35281e+07	7.51184e+07	8.17883e+07	8.36471e+07	6.35281e+07	6.58461e+07	6.81642e+07	7.04823e+07	7.28003e+07	7.51184e+07
AGL2	intensity	AUS	ESG Data Center 2025 Assets; https://www.2025datacentre.agl.com.au/assets/electricity-output-by-primary-energy-source	Output from operated assets from 2021 to 2025			2025										TRUE								0.95	0.94	0.92	0.94	0.98	0.98	0.98	0.98	0.9606	0.873152	0.810544	0.76918	0.735232	0.687335	0.385146	0.322833	0	0	0	0	0	0	0	0	0
AGL3	cumulative emissions	AUS	ESG Data Centre 2022 Environment; https://www.2022datacentre.agl.com.au/environment/greenhouse-energy/operational-greenhouse-gas-footprint-and-net-energy-production	Scope 1 emissions in 2019																					40468100	80332560	115459080	148354380	179000940	2.10558e+08	2.43294e+08	2.7737e+08	3.11979e+08	3.46588e+08	3.81197e+08	4.15805e+08	4.50414e+08	4.85023e+08	5.05532e+08	5.26041e+08	5.26041e+08	5.26041e+08	5.26041e+08	5.26041e+08	5.26041e+08	5.26041e+08	5.26041e+08	5.26041e+08	5.26041e+08
AGL4	SDA intensity	AUS						0.937162																	0.95	0.927986	0.991194	1.09733	1.15675	1.01865	0.880893	0.749092	0.62921	0.485815	0.383544	0.300236	0.226135	0.15415	0.0917351	0.0699684	0.0530479	0.0440211	0.0393305	0.0522151	0.0469163	0.0419778	0.0373642	0.0330444	0.0289912
AGL5	SDA cumulative emissions	AUS																							40468100	7.98231e+07	1.17668e+08	1.56069e+08	1.92243e+08	2.25045e+08	2.5447e+08	2.80517e+08	3.03186e+08	3.22442e+08	3.38819e+08	3.52328e+08	3.62973e+08	3.70734e+08	3.75619e+08	3.80064e+08	3.84049e+08	3.8765e+08	3.90939e+08	3.94257e+08	3.97346e+08	4.00207e+08	4.02841e+08	4.05246e+08	4.07424e+08
AGL6	marketshare																								0.163218	0.159237	0.143262	0.128122	0.119496	0.119496	0.119496	0.119496	0.119496	0.119496	0.119496	0.119496	0.119496	0.119496	0.119496	0.119496	0.119496	0.119496	0.119496	0.119496	0.119496	0.119496	0.119496	0.119496	0.119496
AGL7	my																								1	1.025	1.1393	1.27392	1.36589	1.36589	1.36589	1.36589	1.36589	1.36589	1.36589	1.36589	1.36589	1.36589	1.36589	1.36589	1.36589	1.36589	1.36589	1.36589	1.36589	1.36589	1.36589	1.36589	1.36589
AGL8	consumes total budget Y/N?																								FALSE	FALSE	FALSE	FALSE	FALSE	FALSE	FALSE	FALSE	FALSE	FALSE	FALSE	TRUE	TRUE	TRUE	TRUE	TRUE	TRUE	TRUE	TRUE	TRUE	TRUE	TRUE	TRUE	TRUE	TRUE
AGL9	Difference with SDA intensity																								0	0.012014	-0.0711938	-0.157326	-0.176755	-0.0386471	0.0991068	0.230908	0.331389	0.387337	0.427001	0.468944	0.509097	0.533184	0.293411	0.252865	-0.0530479	-0.0440211	-0.0393305	-0.0522151	-0.0469163	-0.0419778	-0.0373642	-0.0330444	-0.0289912
AGL10	CBD Cumulative emissions																								2.53644e+07	4.94474e+07	7.03203e+07	8.92895e+07	1.05972e+08	1.21127e+08	1.34753e+08	1.46851e+08	1.57421e+08	1.66462e+08	1.74214e+08	1.80677e+08	1.85851e+08	1.89736e+08	1.92332e+08	1.94799e+08	1.97138e+08	1.99349e+08	2.01432e+08	2.03386e+08	2.05252e+08	2.07031e+08	2.08723e+08	2.10327e+08	2.11844e+08
EnergyAustralia	emissions in tCO2e (scope 1)	AUS	Climate transition plan 2023; https://www.energyaustralia.com.au/sites/default/files/2023-09/ClimateTransitionActionPlan.pdf; EnergyAustralia reporting https://www.energyaustralia.com.au/about-us/media/news/energyaustralia-issues-greenhouse-emissions-data-1	Graphical analysis was used to estimate scope 1 emissions from 2021 to 2050, which seems to be in line with the company's targets	2029;2050	60% reduction in absolute scope 1 emissions by 2029 compared with 2020; reduce scope 1 intensity by 65% by 2040 compared with 2020; net zero by 2050	2024																		1.76166e+07	1.7228e+07	1.66839e+07	1.70984e+07	1.7228e+07	1.60881e+07	1.50777e+07	1.1399e+07	5.82902e+06	6.01036e+06	4.66321e+06	5.23316e+06	5.56995e+06	5.95855e+06	5.23316e+06	4.55959e+06	1.37306e+06	1.94301e+06	880829	1.11399e+06	544041	544041	544041	544041	544041
EnergyAustralia1	output	AUS	Climate transition plan 2024; https://www.energyaustralia.com.au/sites/default/files/2024-12/Climate%20Transition%20Action%20Plan.pdf	Graphical analysis was used to estimate scope 1 emissions from 2021 to 2050			2020																	16147997	1.62881e+07	1.66212e+07	1.66328e+07	1.70463e+07	1.63325e+07	1.68179e+07	1.7446e+07	1.81599e+07	1.88166e+07	2.07011e+07	2.23001e+07	2.34993e+07	2.45844e+07	2.62975e+07	2.78109e+07	3.31789e+07	3.92322e+07	4.27157e+07	4.36865e+07	3.31789e+07	3.43895e+07	3.56002e+07	3.68109e+07	3.80215e+07	3.92322e+07
EnergyAustralia2	intensity	AUS	EnergyAustralia NewsMedia on Scope 1 emissions; https://www.energyaustralia.com.au/about-us/media/news/energyaustralia-issues-greenhouse-emissions-data-1	Electricity generation in 2020. Yearly growth rate from underlying pathways was used to estimate past and future generation.													TRUE								1.08156	1.03651	1.00308	1.00306	1.05483	0.956607	0.864249	0.627701	0.309781	0.29034	0.209112	0.222694	0.226565	0.226582	0.18817	0.137424	0.0349982	0.0454869	0.0201625	0.0335753	0.01582	0.015282	0.0147794	0.0143088	0.0138672
EnergyAustralia3	cumulative emissions	AUS																							1.76166e+07	3.48446e+07	5.15285e+07	6.86269e+07	8.58549e+07	1.01943e+08	1.17021e+08	1.2842e+08	1.34249e+08	1.40259e+08	1.44922e+08	1.50155e+08	1.55725e+08	1.61684e+08	1.66917e+08	1.71477e+08	1.7285e+08	1.74793e+08	1.75674e+08	1.76788e+08	1.77332e+08	1.77876e+08	1.7842e+08	1.78964e+08	1.79508e+08
EnergyAustralia4	SDA intensity	AUS						1.06873																	1.08156	1.031	0.992128	0.983644	0.967897	0.852591	0.73758	0.627538	0.527449	0.407728	0.322341	0.252787	0.19092	0.13082	0.0787093	0.0605363	0.0464093	0.0388728	0.0349566	0.045714	0.04129	0.0371669	0.0333149	0.0297083	0.0263243
EnergyAustralia5	SDA cumulative emissions	AUS																							1.76166e+07	3.47531e+07	5.1255e+07	6.80224e+07	8.38306e+07	9.81693e+07	1.11037e+08	1.22433e+08	1.32358e+08	1.40798e+08	1.47987e+08	1.53927e+08	1.58621e+08	1.62061e+08	1.6425e+08	1.66258e+08	1.68079e+08	1.6974e+08	1.71267e+08	1.72783e+08	1.74203e+08	1.75527e+08	1.76753e+08	1.77882e+08	1.78915e+08
EnergyAustralia6	marketshare																								0.0624093	0.0624093	0.0624093	0.0624093	0.0624093	0.0624093	0.0624093	0.0624093	0.0624093	0.0624093	0.0624093	0.0624093	0.0624093	0.0624093	0.0624093	0.0624093	0.0624093	0.0624093	0.0624093	0.0624093	0.0624093	0.0624093	0.0624093	0.0624093	0.0624093
EnergyAustralia7	my																								1	1	1	1	1	1	1	1	1	1	1	1	1	1	1	1	1	1	1	1	1	1	1	1	1
EnergyAustralia8	consumes total budget Y/N?																								FALSE	FALSE	FALSE	FALSE	FALSE	FALSE	FALSE	FALSE	FALSE	FALSE	FALSE	FALSE	FALSE	FALSE	FALSE	FALSE	FALSE	FALSE	FALSE	FALSE	FALSE	FALSE	FALSE	FALSE	FALSE
EnergyAustralia9	Difference with SDA intensity																								0	0.00550174	0.0109482	0.0194153	0.0869335	0.104016	0.126669	0.000162658	-0.217668	-0.117388	-0.113229	-0.0300932	0.0356445	0.0957621	0.10946	0.076888	-0.0114111	0.00661418	-0.0147941	-0.0121387	-0.02547	-0.0218849	-0.0185356	-0.0153996	-0.0124571
EnergyAustralia10	CBD Cumulative emissions																								9.69851e+06	1.91373e+07	2.82301e+07	3.74702e+07	4.61831e+07	5.40978e+07	6.12144e+07	6.75328e+07	7.3053e+07	7.77751e+07	8.18238e+07	8.51993e+07	8.79015e+07	8.99305e+07	9.12862e+07	9.25748e+07	9.37965e+07	9.49511e+07	9.60387e+07	9.70593e+07	9.80341e+07	9.89633e+07	9.98468e+07	1.00685e+08	1.01477e+08
Origin	emissions in tCO2e (scope 1)	AUS	Climate Transition Action Plan 2025; https://www.originenergy.com.au/about/investors-media/climate-transition-action-plan-2/	Targets cover equity emissions intensity for scope 1, 2, 3. The same rate was applied to scope 1 emissions due to a lack of target specific to scope 1 emissions.	2030;2050	40% reduction in Scope 1, 2 and 3 equity emissions intensity by 2030 compared with 2019; net zero by 2050 including scope 3	2025																		14094000	12030000	12922000	14829000	15070000	1.42765e+07	1.35219e+07	1.27347e+07	1.18062e+07	1.14606e+07	1.17285e+07	1.17088e+07	1.15689e+07	1.16471e+07	1.15475e+07	1.2858e+07	1.41178e+07	1.4189e+07	1.33022e+07	9.18427e+06	8.56745e+06	7.88361e+06	7.13275e+06	6.31486e+06	5.42994e+06
Origin1	output	AUS	Sustainable Performance Data 2025; https://www.originenergy.com.au/wp-content/uploads/212/Origin_2025_Sustainability_performance_data.pdf	Emissions and emissions intensity from owned generation from 2021 to 2025																					16200000	1.41529e+07	1.43578e+07	1.70448e+07	1.73218e+07	1.78366e+07	1.85029e+07	1.92599e+07	1.99565e+07	2.19551e+07	2.3651e+07	2.49229e+07	2.60736e+07	2.78906e+07	2.94956e+07	3.51888e+07	4.16088e+07	4.53033e+07	4.63329e+07	3.51888e+07	3.64728e+07	3.77568e+07	3.90408e+07	4.03248e+07	4.16088e+07
Origin2	intensity	AUS	Sustainable Performance Data 2023; https://www.originenergy.com.au/wp-content/uploads/291/Origin_2023_Sustainability_performance_data.pdf	Emissions intensity in the baseline year (2019)			2025										TRUE								0.87	0.85	0.9	0.87	0.87	0.8004	0.7308	0.6612	0.5916	0.522	0.4959	0.4698	0.4437	0.4176	0.3915	0.3654	0.3393	0.3132	0.2871	0.261	0.2349	0.2088	0.1827	0.1566	0.1305
Origin3	cumulative emissions	AUS																							14094000	26124000	39046000	53875000	68945000	8.32215e+07	9.67434e+07	1.09478e+08	1.21284e+08	1.32745e+08	1.44473e+08	1.56182e+08	1.67751e+08	1.79398e+08	1.90946e+08	2.03804e+08	2.17921e+08	2.3211e+08	2.45413e+08	2.54597e+08	2.63164e+08	2.71048e+08	2.78181e+08	2.84496e+08	2.89925e+08
Origin4	SDA intensity	AUS						0.857162																	0.87	0.966681	0.917801	0.787321	0.731178	0.644451	0.557946	0.47518	0.399898	0.309851	0.245628	0.193314	0.146781	0.101577	0.0623825	0.0487138	0.0380883	0.0324197	0.0294742	0.0375653	0.0342378	0.0311366	0.0282395	0.0255268	0.0229815
Origin5	SDA cumulative emissions	AUS																							14094000	2.77754e+07	4.0953e+07	5.43727e+07	6.70381e+07	7.85329e+07	8.88565e+07	9.80085e+07	1.05989e+08	1.12792e+08	1.18601e+08	1.23419e+08	1.27246e+08	1.30079e+08	1.31919e+08	1.33633e+08	1.35218e+08	1.36687e+08	1.38053e+08	1.39374e+08	1.40623e+08	1.41799e+08	1.42901e+08	1.43931e+08	1.44887e+08
Origin6	marketshare																								0.0620718	0.0531414	0.0538731	0.0624039	0.0661898	0.0661898	0.0661898	0.0661898	0.0661898	0.0661898	0.0661898	0.0661898	0.0661898	0.0661898	0.0661898	0.0661898	0.0661898	0.0661898	0.0661898	0.0661898	0.0661898	0.0661898	0.0661898	0.0661898	0.0661898
Origin7	my																								1	1.16805	1.15219	0.994678	0.937784	0.937784	0.937784	0.937784	0.937784	0.937784	0.937784	0.937784	0.937784	0.937784	0.937784	0.937784	0.937784	0.937784	0.937784	0.937784	0.937784	0.937784	0.937784	0.937784	0.937784
Origin8	consumes total budget Y/N?																								FALSE	FALSE	FALSE	FALSE	FALSE	FALSE	FALSE	FALSE	FALSE	FALSE	FALSE	TRUE	TRUE	TRUE	TRUE	TRUE	TRUE	TRUE	TRUE	TRUE	TRUE	TRUE	TRUE	TRUE	TRUE
Origin9	Difference with SDA intensity																								0	-0.116681	-0.0178012	0.0826788	0.138822	0.155949	0.172854	0.18602	0.191702	0.212149	0.250272	0.276486	0.296919	0.316023	0.329118	0.316686	0.301212	0.28078	0.257626	0.223435	0.200662	0.177663	0.154461	0.131073	0.107518
Origin10	CBD Cumulative emissions																								9.64607e+06	1.76832e+07	2.55323e+07	3.47716e+07	4.40123e+07	5.24065e+07	5.99542e+07	6.66553e+07	7.25099e+07	7.7518e+07	8.18121e+07	8.5392e+07	8.8258e+07	9.04098e+07	9.18476e+07	9.32143e+07	9.451e+07	9.57345e+07	9.6888e+07	9.79704e+07	9.90043e+07	9.99898e+07	1.00927e+08	1.01815e+08	1.02655e+08
Stanwell	emissions in tCO2e (scope 1)	AUS	Stanwell Annual Report 2025; https://assets.ctfassets.net/g6959sqmk0wu/65aQQ0IB5Vtms8wTSw2Swc/edabcc0dd9837cdb15470e5c75859ead/Stanwell_Corporation_-_Annual_Report_-_2024-25.pdf	Due to a lack of target, Stanwell's intensity is assumed to remain constant.		None	2025																		17495000	17226000	18172000	17866000	16163000	1.66434e+07	1.7265e+07	1.79714e+07	1.86214e+07	2.04863e+07	2.20687e+07	2.32555e+07	2.43293e+07	2.60247e+07	2.75223e+07	3.28346e+07	3.88251e+07	4.22725e+07	4.32332e+07	3.28346e+07	3.40327e+07	3.52308e+07	3.64289e+07	3.7627e+07	3.88251e+07
Stanwell1	output	AUS	Stanwell Annual Report 2025; https://assets.ctfassets.net/g6959sqmk0wu/65aQQ0IB5Vtms8wTSw2Swc/edabcc0dd9837cdb15470e5c75859ead/Stanwell_Corporation_-_Annual_Report_-_2024-25.pdf	Emissions and emissions intensity in 2025 and 2024																					18654000	18237000	19423000	1.92522e+07	1.71037e+07	1.7612e+07	1.82699e+07	1.90174e+07	1.97051e+07	2.16786e+07	2.33531e+07	2.4609e+07	2.57453e+07	2.75394e+07	2.91241e+07	3.47456e+07	4.10848e+07	4.47328e+07	4.57494e+07	3.47456e+07	3.60135e+07	3.72813e+07	3.85491e+07	3.98169e+07	4.10848e+07
Stanwell2	intensity	AUS	Stanwell Annual Report 2023;https://assets.ctfassets.net/g6959sqmk0wu/7Ez7vFcXCXEPLVPrHK7Dmm/e9a5fb6a626ed50a7872dde9b55f9f16/Stanwell-Annual-Report-2022-23.pdf	Emissions and electricity generation in 2023 and 2022			2025										TRUE								0.937869	0.944563	0.935592	0.928	0.945	0.945	0.945	0.945	0.945	0.945	0.945	0.945	0.945	0.945	0.945	0.945	0.945	0.945	0.945	0.945	0.945	0.945	0.945	0.945	0.945
Stanwell3	cumulative emissions	AUS	Stanwell Annual Report 2022;https://assets.ctfassets.net/g6959sqmk0wu/2O4PCKsoyPvZRzDFwfXMUG/a441e6639b4ac31391d0a43ed7efc59e/Stanwell-Annual-Report-2021-22.pdf	Emissions and electricity generation in 2021																					17495000	34721000	52893000	70759000	86922000	1.03565e+08	1.2083e+08	1.38802e+08	1.57423e+08	1.7791e+08	1.99978e+08	2.23234e+08	2.47563e+08	2.73588e+08	3.0111e+08	3.33945e+08	3.7277e+08	4.15042e+08	4.58275e+08	4.9111e+08	5.25143e+08	5.60374e+08	5.96802e+08	6.34429e+08	6.73255e+08
Stanwell4	SDA intensity	AUS						0.925031																	0.937869	0.932695	0.844127	0.864908	0.91687	0.807725	0.698858	0.594696	0.499954	0.38663	0.305805	0.239967	0.181406	0.124516	0.0751899	0.0579879	0.0446156	0.0374818	0.0337748	0.0439575	0.0397698	0.035867	0.0322209	0.028807	0.0256037
Stanwell5	SDA cumulative emissions	AUS																							17495000	3.45046e+07	5.09e+07	6.75514e+07	8.32333e+07	9.74589e+07	1.10227e+08	1.21537e+08	1.31388e+08	1.3977e+08	1.46911e+08	1.52817e+08	1.57487e+08	1.60916e+08	1.63106e+08	1.65121e+08	1.66954e+08	1.6863e+08	1.70176e+08	1.71703e+08	1.73135e+08	1.74472e+08	1.75714e+08	1.76861e+08	1.77913e+08
Stanwell6	marketshare																								0.0714745	0.0684763	0.0728787	0.0704853	0.0653563	0.0653563	0.0653563	0.0653563	0.0653563	0.0653563	0.0653563	0.0653563	0.0653563	0.0653563	0.0653563	0.0653563	0.0653563	0.0653563	0.0653563	0.0653563	0.0653563	0.0653563	0.0653563	0.0653563	0.0653563
Stanwell7	my																								1	1.04379	0.980733	1.01403	1.09361	1.09361	1.09361	1.09361	1.09361	1.09361	1.09361	1.09361	1.09361	1.09361	1.09361	1.09361	1.09361	1.09361	1.09361	1.09361	1.09361	1.09361	1.09361	1.09361	1.09361
Stanwell8	consumes total budget Y/N?																								FALSE	FALSE	FALSE	FALSE	FALSE	FALSE	FALSE	FALSE	FALSE	FALSE	TRUE	TRUE	TRUE	TRUE	TRUE	TRUE	TRUE	TRUE	TRUE	TRUE	TRUE	TRUE	TRUE	TRUE	TRUE
Stanwell9	Difference with SDA intensity																								0	0.0118687	0.091465	0.0630918	0.0281296	0.137275	0.246142	0.350304	0.445046	0.55837	0.639195	0.705033	0.763594	0.820484	0.86981	0.887012	0.900384	0.907518	0.911225	0.901043	0.90523	0.909133	0.912779	0.916193	0.919396
Stanwell10	CBD Cumulative emissions																								1.11073e+07	2.14636e+07	3.20818e+07	4.25176e+07	5.16419e+07	5.99304e+07	6.7383e+07	7.39998e+07	7.97807e+07	8.47257e+07	8.89657e+07	9.25006e+07	9.53304e+07	9.74552e+07	9.88749e+07	1.00224e+08	1.01504e+08	1.02713e+08	1.03852e+08	1.04921e+08	1.05941e+08	1.06915e+08	1.0784e+08	1.08717e+08	1.09547e+08
AlintaEnergy	emissions in tCO2e (scope 1)	AUS	2024 Sustainability Report; https://www.alintaenergy.com.au/about-us/sustainability		2025;2050																				3.16388e+06	2.74044e+06	2.4743e+06	3.32274e+06	3.12902e+06	3.09314e+06	3.07497e+06	3.06163e+06	3.02815e+06	3.17278e+06	3.24696e+06	3.24149e+06	3.20276e+06	3.22442e+06	3.19685e+06	3.55964e+06	3.90843e+06	3.92812e+06	3.68262e+06	2.5426e+06	2.37184e+06	2.18252e+06	1.97465e+06	1.74823e+06	1.50324e+06
AlintaEnergy1	output	AUS	https://www.alintaenergy.com.au/about-us/sustainability/alinta-energy-data-centre/electricity-generation-and-purchases	Electricity generation for 2021, 2022, 2023, and 2024			2024																		9856334	10621846	10140583	9493543	9.09599e+06	9.36633e+06	9.71617e+06	1.01137e+07	1.04795e+07	1.1529e+07	1.24195e+07	1.30874e+07	1.36917e+07	1.46458e+07	1.54886e+07	1.84782e+07	2.18495e+07	2.37895e+07	2.43302e+07	1.84782e+07	1.91525e+07	1.98267e+07	2.0501e+07	2.11752e+07	2.18495e+07
AlintaEnergy2	intensity	AUS	https://www.alintaenergy.com.au/about-us/sustainability/alinta-energy-data-centre/gri-306-4-emissions-ghg-emissions-intensity	Intensity for 2021, 2022, 2023, and 2024 (group-wide intensity applied to Australian activities)			2024										TRUE								0.321	0.258	0.244	0.35	0.344	0.33024	0.31648	0.30272	0.28896	0.2752	0.26144	0.24768	0.23392	0.22016	0.2064	0.19264	0.17888	0.16512	0.15136	0.1376	0.12384	0.11008	0.09632	0.08256	0.0688
AlintaEnergy3	cumulative emissions	AUS																							3.16388e+06	5.90432e+06	8.37862e+06	1.17014e+07	1.48304e+07	1.79235e+07	2.09985e+07	2.40601e+07	2.70883e+07	3.02611e+07	3.3508e+07	3.67495e+07	3.99523e+07	4.31767e+07	4.63735e+07	4.99332e+07	5.38416e+07	5.77697e+07	6.14524e+07	6.3995e+07	6.63668e+07	6.85493e+07	7.0524e+07	7.22722e+07	7.37754e+07
AlintaEnergy4	SDA intensity	AUS						0.308162																	0.321	0.290835	0.293105	0.316992	0.312058	0.275932	0.239899	0.205423	0.174065	0.136557	0.109805	0.0880139	0.0686309	0.0498015	0.0334752	0.0277816	0.0233556	0.0209944	0.0197675	0.0231378	0.0217517	0.0204599	0.0192531	0.0181232	0.017063
AlintaEnergy5	SDA cumulative emissions	AUS																							3.16388e+06	6.25309e+06	9.22534e+06	1.22347e+07	1.50732e+07	1.76577e+07	1.99886e+07	2.20662e+07	2.38903e+07	2.54646e+07	2.68284e+07	2.79802e+07	2.89199e+07	2.96493e+07	3.01678e+07	3.06811e+07	3.11914e+07	3.16909e+07	3.21718e+07	3.25994e+07	3.3016e+07	3.34216e+07	3.38163e+07	3.42001e+07	3.45729e+07
AlintaEnergy6	marketshare																								0.0377655	0.0398829	0.0380494	0.0347574	0.0347574	0.0347574	0.0347574	0.0347574	0.0347574	0.0347574	0.0347574	0.0347574	0.0347574	0.0347574	0.0347574	0.0347574	0.0347574	0.0347574	0.0347574	0.0347574	0.0347574	0.0347574	0.0347574	0.0347574	0.0347574
AlintaEnergy7	my																								1	0.946909	0.992539	1.08654	1.08654	1.08654	1.08654	1.08654	1.08654	1.08654	1.08654	1.08654	1.08654	1.08654	1.08654	1.08654	1.08654	1.08654	1.08654	1.08654	1.08654	1.08654	1.08654	1.08654	1.08654
AlintaEnergy8	consumes total budget Y/N?																								FALSE	FALSE	FALSE	FALSE	FALSE	FALSE	FALSE	FALSE	FALSE	FALSE	FALSE	TRUE	TRUE	TRUE	TRUE	TRUE	TRUE	TRUE	TRUE	TRUE	TRUE	TRUE	TRUE	TRUE	TRUE
AlintaEnergy9	Difference with SDA intensity																								0	-0.0328349	-0.0491048	0.0330085	0.031942	0.0543076	0.0765805	0.0972966	0.114895	0.138643	0.151635	0.159666	0.165289	0.170359	0.172925	0.164858	0.155524	0.144126	0.131593	0.114462	0.102088	0.0896201	0.0770669	0.0644368	0.051737
AlintaEnergy10	CBD Cumulative emissions																								5.86882e+06	1.19007e+07	1.74444e+07	2.25904e+07	2.74429e+07	3.18508e+07	3.58142e+07	3.93331e+07	4.24075e+07	4.50373e+07	4.72922e+07	4.91721e+07	5.0677e+07	5.1807e+07	5.2562e+07	5.32797e+07	5.39601e+07	5.46031e+07	5.52088e+07	5.57772e+07	5.63201e+07	5.68376e+07	5.73296e+07	5.77962e+07	5.82374e+07
CS Energy	emissions in tCO2e (scope 1)	AUS		This was not considered to be a net zero target: "Our coal-fired power stations help to underpin system reliability, and as the energy market transitions to the goal of net zero by 2050, there will be a requirement for the continuing, reliable operations of these assets"		None																			9624000	9984000	7.99071e+06	8862000	8570642	8.82536e+06	9.155e+06	9.52959e+06	9.87422e+06	1.08631e+07	1.17022e+07	1.23315e+07	1.29009e+07	1.37999e+07	1.45941e+07	1.7411e+07	2.05875e+07	2.24155e+07	2.2925e+07	1.7411e+07	1.80463e+07	1.86816e+07	1.93169e+07	1.99522e+07	2.05875e+07
CS Energy1	output	AUS	Annual Report 2025; https://www.csenergy.com.au/who-we-are/reports-and-publications/annual-reports		Scope 1 emissions and electricity generation in 2025		2024																		9.89106e+06	1.01567e+07	8607000	10142000	9880399	1.0174e+07	1.05541e+07	1.09859e+07	1.13832e+07	1.25232e+07	1.34905e+07	1.4216e+07	1.48724e+07	1.59088e+07	1.68243e+07	2.00717e+07	2.37337e+07	2.5841e+07	2.64283e+07	2.00717e+07	2.08041e+07	2.15365e+07	2.22689e+07	2.30013e+07	2.37337e+07
CS Energy2	intensity	AUS	Annual Report 2024; https://www.csenergy.com.au/who-we-are/reports-and-publications/annual-reports		Scope 1 emissions and electricity generation in 2024		2024										TRUE								0.973	0.983	0.928396	0.873792	0.867439	0.867439	0.867439	0.867439	0.867439	0.867439	0.867439	0.867439	0.867439	0.867439	0.867439	0.867439	0.867439	0.867439	0.867439	0.867439	0.867439	0.867439	0.867439	0.867439	0.867439
CS Energy3	cumulative emissions	AUS	Annual Report 2023; https://www.csenergy.com.au/who-we-are/reports-and-publications/annual-reports		Output in 2023. Scope 1 emissions and intensity are not reported so scope 1 emissions was assumed to be the average between the intensity in 2022 and 2024																				9624000	19608000	2.75987e+07	3.64607e+07	4.50313e+07	5.38567e+07	6.30117e+07	7.25413e+07	8.24155e+07	9.32787e+07	1.04981e+08	1.17312e+08	1.30213e+08	1.44013e+08	1.58607e+08	1.76018e+08	1.96606e+08	2.19021e+08	2.41946e+08	2.59357e+08	2.77404e+08	2.96085e+08	3.15402e+08	3.35354e+08	3.55942e+08
CS Energy4	SDA intensity	AUS	Annual Report 2022; https://www.csenergy.com.au/who-we-are/reports-and-publications/annual-reports		Scope 1 emissions and emissions intensity in 2022 and 2021			0.960162																	0.973	0.921875	1.0453	0.903044	0.874147	0.770159	0.666438	0.567198	0.476934	0.368965	0.29196	0.229233	0.173439	0.119239	0.0722432	0.0558541	0.0431138	0.0363171	0.0327853	0.0424868	0.038497	0.0347787	0.0313048	0.0280523	0.0250004
CS Energy5	SDA cumulative emissions	AUS																							9624000	1.89872e+07	2.79841e+07	3.71428e+07	4.57797e+07	5.36153e+07	6.0649e+07	6.68801e+07	7.23092e+07	7.69298e+07	8.08685e+07	8.41273e+07	8.67067e+07	8.86037e+07	8.98191e+07	9.09402e+07	9.19635e+07	9.29019e+07	9.37684e+07	9.46212e+07	9.54221e+07	9.61711e+07	9.68682e+07	9.75135e+07	9.81068e+07
CS Energy6	marketshare																								0.0378985	0.0381362	0.0322951	0.0371315	0.0377548	0.0377548	0.0377548	0.0377548	0.0377548	0.0377548	0.0377548	0.0377548	0.0377548	0.0377548	0.0377548	0.0377548	0.0377548	0.0377548	0.0377548	0.0377548	0.0377548	0.0377548	0.0377548	0.0377548	0.0377548
CS Energy7	my																								1	0.993767	1.17351	1.02066	1.00381	1.00381	1.00381	1.00381	1.00381	1.00381	1.00381	1.00381	1.00381	1.00381	1.00381	1.00381	1.00381	1.00381	1.00381	1.00381	1.00381	1.00381	1.00381	1.00381	1.00381
CS Energy8	consumes total budget Y/N?																								FALSE	FALSE	FALSE	FALSE	FALSE	FALSE	FALSE	FALSE	FALSE	FALSE	TRUE	TRUE	TRUE	TRUE	TRUE	TRUE	TRUE	TRUE	TRUE	TRUE	TRUE	TRUE	TRUE	TRUE	TRUE
CS Energy9	Difference with SDA intensity																								0	0.0611247	-0.116908	-0.0292516	-0.00670796	0.0972797	0.201001	0.300241	0.390505	0.498474	0.575479	0.638205	0.694	0.7482	0.795196	0.811585	0.824325	0.831122	0.834654	0.824952	0.828942	0.83266	0.836134	0.839387	0.842438
CS Energy10	CBD Cumulative emissions																								5.88949e+06	1.16572e+07	1.63625e+07	2.186e+07	2.7131e+07	3.1919e+07	3.62242e+07	4.00466e+07	4.33861e+07	4.62427e+07	4.8692e+07	5.0734e+07	5.23687e+07	5.35962e+07	5.44163e+07	5.51959e+07	5.59349e+07	5.66334e+07	5.72913e+07	5.79087e+07	5.84985e+07	5.90606e+07	5.95951e+07	6.01019e+07	6.05811e+07
Hydro Tasmania	emissions in tCO2e (scope 1)	AUS	Annual Report 2025;https://www.hydro.com.au/docs/default-source/about-us/our-governance/annual-reports/hydro-tasmania-annual-report-2024.pdf?sfvrsn=6ad6929_1	Scope 1 & 2 target applies to scope 1 emissions		Net zero by 2025	2023																		51342.3	40771.8	60939	8862000	0	0	0	0	0	0	0	0	0	0	0	0	0	0	0	0	0	0	0	0	0
Hydro Tasmania1	output	AUS	Annual Report 2025;https://www.hydro.com.au/docs/default-source/about-us/our-governance/annual-reports/hydro-tasmania-annual-report-2024.pdf?sfvrsn=6ad6929_1	Output from 2021 to 2024			2024																		8253000	9591000	8303000	7688000	7.36606e+06	7.58498e+06	7.86829e+06	8.19023e+06	8.48642e+06	9.33635e+06	1.00575e+07	1.05984e+07	1.10877e+07	1.18604e+07	1.25429e+07	1.49639e+07	1.7694e+07	1.92651e+07	1.97029e+07	1.49639e+07	1.55099e+07	1.60559e+07	1.6602e+07	1.7148e+07	1.7694e+07
Hydro Tasmania2	intensity	AUS	Net Zero Action Plan 2024; https://www.hydro.com.au/docs/default-source/default-document-library/final-hydrotas_net-zero-brochure-updated-25-september-2024.pdf	Scope 1 emissions in 2023, graphical analysis was used to estimate scope 1 emissions in 2021 and 2022. Scope 1 emissions/ emissions intensity are not available for 2024 so emissions intensity from 2023 is used as a proxy													TRUE								0.00622104	0.00425105	0.0073394	0.0073394	0	0	0	0	0	0	0	0	0	0	0	0	0	0	0	0	0	0	0	0	0
Hydro Tasmania3	cumulative emissions	AUS																							51342.3	92114.1	153053	9.01505e+06	9.01505e+06	9.01505e+06	9.01505e+06	9.01505e+06	9.01505e+06	9.01505e+06	9.01505e+06	9.01505e+06	9.01505e+06	9.01505e+06	9.01505e+06	9.01505e+06	9.01505e+06	9.01505e+06	9.01505e+06	9.01505e+06	9.01505e+06	9.01505e+06	9.01505e+06	9.01505e+06	9.01505e+06
Hydro Tasmania4	SDA intensity	AUS						-0.00661654																	0.00622104	0.0073025	0.00668372	0.00608522	0.00619474	0.00699675	0.0077967	0.00856208	0.00925825	0.010091	0.0106849	0.0111686	0.0115989	0.012017	0.0123794	0.0125058	0.0126041	0.0126565	0.0126837	0.0126089	0.0126397	0.0126684	0.0126952	0.0127202	0.0127438
Hydro Tasmania5	SDA cumulative emissions	AUS																							51342.3	121381	176875	223659	269289	322360	383706	453832	532401	626614	734077	852446	981052	1.12358e+06	1.27885e+06	1.46599e+06	1.689e+06	1.93283e+06	2.18274e+06	2.37142e+06	2.56746e+06	2.77086e+06	2.98162e+06	3.19975e+06	3.42524e+06
Hydro Tasmania6	marketshare																								0.0316221	0.0360123	0.0311544	0.028147	0.028147	0.028147	0.028147	0.028147	0.028147	0.028147	0.028147	0.028147	0.028147	0.028147	0.028147	0.028147	0.028147	0.028147	0.028147	0.028147	0.028147	0.028147	0.028147	0.028147	0.028147
Hydro Tasmania7	my																								1	0.878093	1.01501	1.12346	1.12346	1.12346	1.12346	1.12346	1.12346	1.12346	1.12346	1.12346	1.12346	1.12346	1.12346	1.12346	1.12346	1.12346	1.12346	1.12346	1.12346	1.12346	1.12346	1.12346	1.12346
Hydro Tasmania8	consumes total budget Y/N?																								FALSE	FALSE	FALSE	TRUE	TRUE	TRUE	TRUE	TRUE	TRUE	TRUE	TRUE	TRUE	TRUE	TRUE	TRUE	TRUE	TRUE	TRUE	TRUE	TRUE	TRUE	TRUE	TRUE	TRUE	TRUE
Hydro Tasmania9	Difference with SDA intensity																								0	-0.00305145	0.000655676	0.00125418	-0.00619474	-0.00699675	-0.0077967	-0.00856208	-0.00925825	-0.010091	-0.0106849	-0.0111686	-0.0115989	-0.012017	-0.0123794	-0.0125058	-0.0126041	-0.0126565	-0.0126837	-0.0126089	-0.0126397	-0.0126684	-0.0126952	-0.0127202	-0.0127438
Hydro Tasmania10	CBD Cumulative emissions																								4.91413e+06	1.03606e+07	1.48997e+07	1.90671e+07	2.29966e+07	2.65663e+07	2.97759e+07	3.26255e+07	3.51152e+07	3.72449e+07	3.90709e+07	4.05932e+07	4.1812e+07	4.2727e+07	4.33385e+07	4.39197e+07	4.44706e+07	4.49914e+07	4.54819e+07	4.59422e+07	4.63818e+07	4.68009e+07	4.71994e+07	4.75772e+07	4.79344e+07
Australian companies	emissions in tCO2e (scope 1)	AUS																							1.02513e+08	9.91136e+07	9.34304e+07	1.03735e+08	9.08072e+07	9.04838e+07	9.08307e+07	8.87719e+07	8.37678e+07	8.66021e+07	8.80185e+07	9.03793e+07	9.21806e+07	9.52636e+07	8.26029e+07	9.17318e+07	7.8812e+07	8.47481e+07	8.40238e+07	6.30865e+07	6.35624e+07	6.45226e+07	6.53973e+07	6.61864e+07	6.68899e+07
Australian companies1	output (MWh)	AUS																							1.2174e+08	1.2179e+08	1.15645e+08	1.15662e+08	1.08372e+08	1.11593e+08	1.15761e+08	1.20498e+08	1.24856e+08	1.3736e+08	1.4797e+08	1.55927e+08	1.63127e+08	1.74495e+08	1.84536e+08	2.20155e+08	2.60321e+08	2.83436e+08	2.89877e+08	2.20155e+08	2.28188e+08	2.36222e+08	2.44255e+08	2.52288e+08	2.60321e+08
Australian companies2	intensity	AUS															TRUE								0.842061	0.81381	0.807906	0.896886	0.837918	0.810835	0.784637	0.736708	0.670917	0.630474	0.59484	0.579624	0.565085	0.545939	0.447624	0.416669	0.302749	0.299003	0.28986	0.286555	0.278552	0.273144	0.267742	0.262344	0.256951
Australian companies3	cumulative emissions	AUS																							1.02513e+08	2.01627e+08	2.95057e+08	3.98792e+08	4.896e+08	5.80083e+08	6.70914e+08	7.59686e+08	8.43454e+08	9.30056e+08	1.01807e+09	1.10845e+09	1.20063e+09	1.2959e+09	1.3785e+09	1.47023e+09	1.54904e+09	1.63379e+09	1.71782e+09	1.7809e+09	1.84447e+09	1.90899e+09	1.97439e+09	2.04057e+09	2.10746e+09
Australian companies4	SDA intensity	AUS						0.829224																	0.842061	0.818664	0.829644	0.84258	0.847544	0.746768	0.64625	0.550076	0.462599	0.357965	0.283339	0.22255	0.168479	0.115952	0.0704084	0.0545255	0.0421787	0.0355919	0.0321692	0.041571	0.0377045	0.034101	0.0307345	0.0275823	0.0246248
Australian companies5	SDA cumulative emissions	AUS																							1.02513e+08	2.02218e+08	2.98162e+08	3.95616e+08	4.87467e+08	5.70801e+08	6.45612e+08	7.11895e+08	7.69653e+08	8.18823e+08	8.60749e+08	8.95451e+08	9.22934e+08	9.43167e+08	9.5616e+08	9.68164e+08	9.79144e+08	9.89232e+08	9.98557e+08	1.00771e+09	1.01631e+09	1.02437e+09	1.03188e+09	1.03883e+09	1.04524e+09
Australian companies6	marketshare	AUS																							0.46646	0.457296	0.433922	0.423457	0.414111	0.414111	0.414111	0.414111	0.414111	0.414111	0.414111	0.414111	0.414111	0.414111	0.414111	0.414111	0.414111	0.414111	0.414111	0.414111	0.414111	0.414111	0.414111	0.414111	0.414111
Australian companies7	my	AUS																							1	1.02004	1.07499	1.10155	1.12641	1.12641	1.12641	1.12641	1.12641	1.12641	1.12641	1.12641	1.12641	1.12641	1.12641	1.12641	1.12641	1.12641	1.12641	1.12641	1.12641	1.12641	1.12641	1.12641	1.12641
Australian companies8	consumes total budget Y/N?	AUS																							FALSE	FALSE	FALSE	FALSE	FALSE	FALSE	FALSE	FALSE	FALSE	FALSE	FALSE	TRUE	TRUE	TRUE	TRUE	TRUE	TRUE	TRUE	TRUE	TRUE	TRUE	TRUE	TRUE	TRUE	TRUE
Australian companies9	Cumulative overshoot	AUS																							0	-0.00485417	-0.0217384	0.0543062	-0.00962626	0.0640671	0.138386	0.186632	0.208318	0.272509	0.311501	0.357074	0.396606	0.429987	0.377216	0.362143	0.26057	0.263411	0.257691	0.244984	0.240848	0.239043	0.237007	0.234762	0.232326
Australian companies10	CBD Cumulative emissions	AUS																							7.24887e+07	1.4165e+08	2.04871e+08	2.67566e+08	3.2538e+08	3.77898e+08	4.25119e+08	4.67044e+08	5.03673e+08	5.35006e+08	5.61871e+08	5.84269e+08	6.02199e+08	6.15662e+08	6.24657e+08	6.33208e+08	6.41314e+08	6.48975e+08	6.56192e+08	6.62964e+08	6.69433e+08	6.75598e+08	6.8146e+08	6.87019e+08	6.92275e+08
SSE - UK	emissions in tCO2e (scope 1)	GBR	Net Zero Transition Plan 2025; https://www.sse.com/media/4bzijbrj/sse-net-zero-transition-plan-2025.pdf		2030;2040	Target to cut emission intensity by 80% by 2030 compared with 2018 to target 61gCO2e/kWh and net zero by 2040	2025																		6000000	4220000	5350000	3640000	4580000	3.97137e+06	3.36796e+06	2.76063e+06	2.11374e+06	1.44266e+06
SSE - UK1	output (MWh)	GBR	Annual Report 2025; https://www.sse.com/annual-report-2025/	Scope 1 emissions and output in the UK in 2025 and 2024			2025																		24014000	17996000	21078000	18162000	21231000	2.14927e+07	2.18936e+07	2.24644e+07	2.29893e+07	2.36502e+07
SSE - UK2	intensity	GBR	Annual Report 2023; https://www.sse.com/annualreport2023/	Scope 1 emissions and output in the UK in 2023 and 2022													FALSE					TRUE			0.249854	0.234497	0.253819	0.200418	0.215722	0.184778	0.153833	0.122889	0.0919445	0.061
SSE - UK3	cumulative emissions	GBR	Annual Report 2021; https://www.sse.com/investors/reports-and-results/?year=archive	Scope 1 emissions and output in the UK in 2021 and 2020																					6000000	10220000	15570000	19210000	23790000	2.77614e+07	3.11293e+07	3.389e+07	3.60037e+07	3.74464e+07
SSE - UK4	SDA intensity	GBR						0.203819																	0.253819	0.308282	0.221689	0.219679	0.171158	0.146927	0.122695	0.0984634	0.0742317	0.05
SSE - UK5	SDA cumulative emissions	GBR																							6.09521e+06	1.16431e+07	1.63158e+07	2.03056e+07	2.39395e+07	2.70974e+07	2.97836e+07	3.19955e+07	3.3702e+07	3.48846e+07
SSE - UK6	marketshare																								0.0781099	0.0561542	0.0741375	0.0642995	0.0750412	0.0750412	0.0750412	0.0750412	0.0750412	0.0750412
SSE - UK7	my																								1	1.39099	1.05358	1.21478	1.04089	1.04089	1.04089	1.04089	1.04089	1.04089
SSE - UK8	consumes total budget Y/N?																								FALSE	FALSE	FALSE	FALSE	FALSE	FALSE	FALSE	FALSE	TRUE	TRUE
SSE - UK9	Cumulative overshoot																								0.984379	0.877776	0.954288	0.946043	0.993755	1.0245	1.04518	1.05921	1.06829	1.07344
SSE - UK10	CBD Cumulative emissions																								4.83499e+06	8.21596e+06	1.18203e+07	1.46121e+07	1.75086e+07	2.00693e+07	2.22993e+07	2.41991e+07	2.5746e+07	2.69285e+07
RWE - UK	emissions in tCO2e (scope 1)	GBR	Annual Report 2024; https://www.rwe.com/-/media/RWE/documents/05-investor-relations/finanzkalendar-und-veroeffentlichungen/2024-gj/2025-03-20-rwe-annual-report-2024.pdf	Company-wide targets were applied to the UK.	2030;2040	Reduce company-wide carbon intensity by 71.1% compared with 2022 by 2030 and net zero by 2040.	2024																		12800000	13900000	10200000	6800000	6.08631e+06	5.4275e+06	4.78122e+06	4.13888e+06	3.45065e+06	2.74236e+06
RWE - UK1	output	GBR	Annual Report 2024; https://www.rwe.com/-/media/RWE/documents/05-investor-relations/finanzkalendar-und-veroeffentlichungen/2024-gj/2025-03-20-rwe-annual-report-2024.pdf	Output and emissions in 2024 and 2023			2024																		43012000	48662000	39009000	29773000	2.9822e+07	3.01896e+07	3.07527e+07	3.15546e+07	3.22918e+07	3.32202e+07
RWE - UK2	intensity	GBR	Annual Report 2022; https://www.rwe.com/-/media/RWE/documents/05-investor-relations/finanzkalendar-und-veroeffentlichungen/2022-GJ/2023-03-21-rwe-annual-report-2022.pdf	Output and emissions in 2022 and 2021													FALSE								0.297591	0.285644	0.261478	0.228395	0.204088	0.17978	0.155473	0.131166	0.106858	0.0825511
RWE - UK3	cumulative emissions	GBR	Annual Report 2020; https://www.rwe.com/-/media/RWE/documents/05-investor-relations/finanzkalendar-und-veroeffentlichungen/2020-Q4/2021-03-16-rwe-annual-report-2020.pdf?sc_lang=en	Output and emissions in 2020																					12800000	26700000	36900000	43700000	4.97863e+07	5.52138e+07	5.9995e+07	6.41339e+07	6.75846e+07	7.03269e+07
RWE - UK4	SDA intensity	GBR						0.211478																	0.261478	0.227512	0.222407	0.242359	0.2103	0.17824	0.14618	0.11412	0.0820599	0.05
RWE - UK5	SDA cumulative emissions	GBR																							1.12467e+07	2.23179e+07	3.09937e+07	3.82095e+07	4.44811e+07	4.9862e+07	5.43575e+07	5.79585e+07	6.06083e+07	6.22693e+07
RWE - UK6	marketshare																								0.139904	0.151844	0.137206	0.105406	0.105406	0.105406	0.105406	0.105406	0.105406	0.105406
RWE - UK7	my																								1	0.921372	1.01967	1.32729	1.32729	1.32729	1.32729	1.32729	1.32729	1.32729
RWE - UK8	consumes total budget Y/N?																								FALSE	FALSE	FALSE	FALSE	FALSE	FALSE	FALSE	TRUE	TRUE	TRUE
RWE - UK9	Cumulative overshoot																								1.13811	1.19635	1.19056	1.14369	1.11927	1.10733	1.10371	1.10655	1.1151	1.1294
RWE - UK10	CBD Cumulative emissions																								8.66005e+06	1.78024e+07	2.44729e+07	2.90494e+07	3.3118e+07	3.67149e+07	3.98473e+07	4.25159e+07	4.46887e+07	4.63497e+07
EDF - UK	emissions in tCO2e (scope 1)	GBR	UK specific sustainability fact sheet "EDF Sustainable business update" 2024 and 2022 https://www.edfenergy.com/sites/default/files/2024-08/EDF_SBU24_REPORT.pdf		2050	Net Zero by 2050	2023																		1700000	9769	10165	9788.52	9412.04	9035.56	8659.07	8282.59	7906.11	7529.63
EDF - UK1	output	GBR	UK specific sustainability fact sheet "EDF Sustainable business update" 2024; https://www.edfenergy.com/sites/default/files/2024-08/EDF_SBU24_REPORT.pdf	Scope 1 emissions and Intensity in 2021, 2022 and 2023. Output was estimated using the country's yearly growth rate in 2022 and 2023.																					4.72222e+07	4.92246e+07	4.36696e+07	4.33854e+07	4.34569e+07	4.39925e+07	4.48131e+07	4.59816e+07	4.70559e+07	4.84087e+07
EDF - UK2	intensity	GBR															FALSE					TRUE			0.036	0.002	0.001	0.000225618	0.000216583	0.000205388	0.000193226	0.000180129	0.000168015	0.000155543
EDF - UK3	cumulative emissions	GBR																							1700000	1709769	1719934	1.72972e+06	1.73913e+06	1.74817e+06	1.75683e+06	1.76511e+06	1.77302e+06	1.78055e+06
EDF - UK4	SDA intensity	GBR						-0.049																	0.001	0.00536022	0.0108234	0.0164201	0.0220167	0.0276134	0.03321	0.0388067	0.0444033	0.05
EDF - UK5	SDA cumulative emissions	GBR																							47222.2	311077	783731	1.49612e+06	2.4529e+06	3.66768e+06	5.15593e+06	6.94032e+06	9.02976e+06	1.14502e+07
EDF - UK6	marketshare																								0.153599	0.153599	0.153599	0.153599	0.153599	0.153599	0.153599	0.153599	0.153599	0.153599
EDF - UK7	my																								1	1	1	1	1	1	1	1	1	1
EDF - UK8	consumes total budget Y/N?																								FALSE	FALSE	FALSE	FALSE	FALSE	FALSE	FALSE	FALSE	FALSE	FALSE
EDF - UK9	Cumulative overshoot																								36	5.49629	2.19455	1.15614	0.709011	0.476641	0.34074	0.254327	0.196353	0.155504
EDF - UK10	CBD Cumulative emissions																								9.50774e+06	1.87557e+07	2.62232e+07	3.28922e+07	3.8821e+07	4.40624e+07	4.86269e+07	5.25156e+07	5.56818e+07	5.81022e+07
Drax	emissions in tCO2e (scope 1 and 2)	GBR	Climate Transition Plan 2025; https://www.drax.com/wp-content/uploads/2025/04/Drax-Climate-Transition-Plan_FINAL.pdf	Emissions targets for scope 1 and 2 were applied to scope 1 emissions. Since Drax has already met its interim targets, its carbon intensity is assumed to remain constant for as long as this level remains more ambitious than the applicable targets.	2030; 2040	75.7% reduction in Scope 1 and 2 emissions from electricity generation by 2030 (kgCO2e/MWh); net zero by 2040	2023																		525000	310000	141000	207000	207341	209897	213812	219387	224512	230967
Drax1	output	GBR	Climate performance 2024; https://www.drax.com/sustainability/climate-positive/	Scope 1 emissions and intensity from 2021 to 2024																					1.59091e+07	1.34783e+07	1.28182e+07	1.59231e+07	1.59493e+07	1.61459e+07	1.64471e+07	1.68759e+07	1.72702e+07	1.77667e+07
Drax2	intensity	GBR	Annual Report 2022; https://www.drax.com/wp-content/uploads/2023/03/Drax_AR2022_single_pages.final_.pdf	Scope 1 emissions and intensity in 2020													FALSE					TRUE			0.033	0.023	0.011	0.013	0.013	0.013	0.013	0.013	0.013	0.013
Drax3	cumulative emissions	GBR																							525000	835000	976000	1183000	1.39034e+06	1.60024e+06	1.81405e+06	2.03344e+06	2.25795e+06	2.48892e+06
Drax4	SDA intensity	GBR						-0.039																	0.011	0.00628429	0.0142112	0.0254662	0.0295552	0.0336442	0.0377331	0.0418221	0.045911	0.05
Drax5	SDA cumulative emissions	GBR																							175000	259701	441863	847364	1.31875e+06	1.86196e+06	2.48256e+06	3.18835e+06	3.98124e+06	4.86957e+06
Drax6	marketshare																								0.0517472	0.0420572	0.0450853	0.056373	0.056373	0.056373	0.056373	0.056373	0.056373	0.056373
Drax7	my																								1	1.2304	1.14776	0.917943	0.917943	0.917943	0.917943	0.917943	0.917943	0.917943
Drax8	consumes total budget Y/N?																								FALSE	FALSE	FALSE	FALSE	FALSE	FALSE	FALSE	FALSE	FALSE	FALSE
Drax9	Cumulative overshoot																								3	3.21523	2.20883	1.39609	1.05429	0.859435	0.730716	0.637771	0.567147	0.511116
Drax10	CBD Cumulative emissions																								3.20314e+06	5.73535e+06	7.92726e+06	1.03749e+07	1.25508e+07	1.44745e+07	1.61497e+07	1.75769e+07	1.8739e+07	1.96273e+07
Uniper	International energy company which does not report its key performance data at the country level so the company cannot be included in the analysis.
Centrica	International energy company which does not report its key performance data at the country level so the company cannot be included in the analysis.
British companies	emissions in tCO2e (scope 1)	GBR																							21025000	18439769	15701165	1.06568e+07	1.08831e+07	9.61781e+06	8.37165e+06	7.12718e+06	5.79681e+06	4.42352e+06
British companies1	output	GBR																							1.30157e+08	1.29361e+08	1.16575e+08	1.07244e+08	1.10459e+08	1.11821e+08	1.13906e+08	1.16876e+08	1.19607e+08	1.23046e+08
British companies2	intensity	GBR															FALSE					TRUE			0.161535	0.142545	0.134687	0.09937	0.0985256	0.0860109	0.0734959	0.0609804	0.0484654	0.0359502
British companies3	cumulative emissions	GBR																							21025000	39464769	55165934	6.58227e+07	7.67058e+07	8.63236e+07	9.46952e+07	1.01822e+08	1.07619e+08	1.12043e+08
British companies4	SDA intensity	GBR						0.0846875																	0.134687	0.130918	0.119911	0.114714	0.102445	0.0919556	0.0814667	0.0709778	0.0604889	0.05
British companies5	SDA cumulative emissions	GBR																							1.75306e+07	3.44662e+07	4.84449e+07	6.07472e+07	7.20631e+07	8.23457e+07	9.16253e+07	9.99209e+07	1.07156e+08	1.13308e+08
British companies6	marketshare																								0.42336	0.403654	0.410028	0.379678	0.39042	0.39042	0.39042	0.39042	0.39042	0.39042
British companies7	my																								1	1.04882	1.03252	1.11505	1.08437	1.08437	1.08437	1.08437	1.08437	1.08437
British companies8	consumes total budget Y/N?																								FALSE	FALSE	FALSE	FALSE	FALSE	FALSE	FALSE	FALSE	FALSE	FALSE
British companies9	Cumulative overshoot																								1.19933	1.14503	1.13874	1.08355	1.06442	1.04831	1.03351	1.01903	1.00432	0.988833
British companies10	CBD Cumulative emissions																								2.62059e+07	5.05094e+07	7.04437e+07	8.69286e+07	1.01998e+08	1.15321e+08	1.26923e+08	1.36808e+08	1.44855e+08	1.51008e+08
Tata Power	emissions in tCO2e (scope 1)	IND	Annual Report 2025; https://www.tatapower.com/company-financials/annual-reports/106annualreport-2024-25.pdf		2037;2045	Tata Power commits to reduce scope 1 GHG emissions 70.5 % per MWh by FY2037 from a FY2022 base year. Net Zero by 2045.	2025																	34952981	34500000	27330000	28312000	40202000	41352000	4.14887e+07	4.15828e+07	4.08358e+07	3.99682e+07	3.8962e+07	3.77957e+07	3.64429e+07
Tata Power1	output	IND	Annual Report 2025; https://www.tatapower.com/company-financials/annual-reports/106annualreport-2024-25.pdf	Scope 1 emissions in 2025 and 2024. Scope 1+2 emissions and Scope 1+2 emissions intensity where use to estimate output in 2025 and 2024.			2025																	5.13583e+07	5.02635e+07	3.47796e+07	3.90068e+07	5.10703e+07	5.05147e+07	5.39015e+07	5.76887e+07	6.07754e+07	6.41531e+07	6.78648e+07	7.19627e+07	7.65104e+07
Tata Power2	intensity	IND	Annual Report 2023; https://www.tatapower.com/company-financials/annual-reports/104annualreport-2022-23.pdf	Scope 1 emissions in 2023 and 2022. Scope 1+2 emissions and Scope 1+2 emissions intensity where use to estimate output in 2023 and 2022.													TRUE						TRUE	0.680571	0.686383	0.785806	0.725823	0.78719	0.818613	0.769713	0.720813	0.671913	0.623013	0.574113	0.525213	0.476313					0.231813
Tata Power3	cumulative emissions	IND	Annual Report 2021; https://www.tatapower.com/company-financials/annual-reports/102annualreport-2020-21.pdf	Scope 1 emissions in 2021. Scope 1+2 emissions and Scope 1+2 emissions intensity where use to estimate output in 2021.																				34952981	69452981	96782981	125094981	165296981	206648981	2.48138e+08	2.8972e+08	3.30556e+08	3.70524e+08	4.09486e+08	4.47282e+08	4.83725e+08
Tata Power4	SDA intensity	IND	Annual Report 2020; https://www.tatapower.com/company-financials/annual-reports/101annualreport-2019-20.pdf	Scope 1 emissions in 2021. Scope 1+2 emissions and Scope 1+2 emissions intensity where use to estimate output in 2020.				0.250571																0.680571	0.67552	0.829458	0.763637	0.66513	0.644886	0.606799	0.568712	0.540969	0.513227	0.485485	0.457742	0.43
Tata Power5	SDA cumulative emissions	IND																						34952981	6.8907e+07	9.77552e+07	1.27542e+08	1.61511e+08	1.94087e+08	2.26794e+08	2.59602e+08	2.9248e+08	3.25405e+08	3.58352e+08	3.91293e+08	4.24192e+08
Tata Power6	marketshare																							0.0392876	0.0386638	0.0246442	0.0260918	0.0321783	0.0299086	0.0299086	0.0299086	0.0299086	0.0299086	0.0299086	0.0299086	0.0299086
Tata Power7	my																							1	1.01614	1.59419	1.50575	1.22094	1.31359	1.31359	1.31359	1.31359	1.31359	1.31359	1.31359	1.31359	#DIV/0!	#DIV/0!	#DIV/0!	#DIV/0!	#DIV/0!	#DIV/0!	#DIV/0!	#DIV/0!	#DIV/0!	#DIV/0!	#DIV/0!	#DIV/0!	#DIV/0!
Tata Power8	consumes total budget Y/N?																							FALSE	FALSE	FALSE	FALSE	FALSE	FALSE	FALSE	FALSE	FALSE	FALSE	FALSE	TRUE	TRUE	FALSE	FALSE	FALSE	FALSE	FALSE	FALSE	FALSE	FALSE	FALSE	FALSE	FALSE	FALSE	FALSE
Tata Power9	Cumulative overshoot																							1	1.00792	0.990055	0.980812	1.02344	1.06472	1.09411	1.11602	1.13018	1.13866	1.14269	1.14309	1.14034	#DIV/0!	#DIV/0!	#DIV/0!	#DIV/0!	#DIV/0!	#DIV/0!	#DIV/0!	#DIV/0!	#DIV/0!	#DIV/0!	#DIV/0!	#DIV/0!	#DIV/0!
Tata Power10	CBD Cumulative emissions																							3.64644e+07	7.16488e+07	9.63424e+07	1.22773e+08	1.55724e+08	1.86679e+08	2.17964e+08	2.49577e+08	2.81448e+08	3.13576e+08	3.45961e+08	3.78603e+08	4.11503e+08
NTPC	emissions in tCO2e (scope 1)	IND	The Brighter Plan 2032; https://ntpc.co.in/sites/default/files/inline-files/TBP%20Update%202025.pdf	Scope 1 & 2 intensity target is used as a proxy for a scope 1 intensity target given that scope 2 emissions are marginal.	2037	Reach GHG (Scope 1+2) emission (gm/ kwh) of 713.74 by 2032; Net zero by 2070	2025																	252440000	2.639e+08	304140000	336460000	353250000	371170000	3.87307e+08	4.05157e+08	4.16972e+08	4.29733e+08	4.43582e+08	4.58688e+08	4.75258e+08	TRUE
NTPC1	output	IND	Annual Report 2025; https://ntpc.co.in/sites/default/files/annual-report/complete-reports/Annual%20Report%202024-25_1.pdf	Scope 1 emissions from electricity generation and scope 1 emissions intensity in 2023, 2024, and 2025																				2.90161e+08	3.14167e+08	3.60509e+08	4.00214e+08	4.2315e+08	4.39629e+08	4.69104e+08	5.02064e+08	5.28928e+08	5.58323e+08	5.90626e+08	6.2629e+08	6.65869e+08
NTPC2	intensity	IND	Annual Report 2022; https://ntpc.co.in/sites/default/files/annual-report/complete-reports/Annual-Report-2021-22.pdf	Scope 1 emissions from electricity generation and scope 1 emissions intensity in 2022, 2021, and 2020			2025										TRUE						TRUE	0.87	0.84	0.84364	0.8407	0.83481	0.84428	0.825631	0.806983	0.788334	0.769686	0.751037	0.732389	0.71374
NTPC3	cumulative emissions	IND																						252440000	516340000	820480000	1156940000	1510190000	1881360000	2.26867e+09	2.67382e+09	3.0908e+09	3.52053e+09	3.96411e+09	4.4228e+09	4.89806e+09
NTPC4	SDA intensity	IND						0.44																0.87	0.8197	0.812322	0.752606	0.711535	0.674957	0.63154	0.588123	0.556499	0.524874	0.493249	0.461625	0.43
NTPC5	SDA cumulative emissions	IND																						2.5244e+08	5.09962e+08	8.02812e+08	1.10402e+09	1.4051e+09	1.70183e+09	1.99809e+09	2.29337e+09	2.58771e+09	2.88076e+09	3.17209e+09	3.4612e+09	3.74752e+09
NTPC6	marketshare	IND																						0.221965	0.241664	0.255451	0.267705	0.266618	0.260294	0.260294	0.260294	0.260294	0.260294	0.260294	0.260294	0.260294
NTPC7	my	IND																						1	0.918484	0.868914	0.829139	0.83252	0.852745	0.852745	0.852745	0.852745	0.852745	0.852745	0.852745	0.852745	#DIV/0!	#DIV/0!	#DIV/0!	#DIV/0!	#DIV/0!	#DIV/0!	#DIV/0!	#DIV/0!	#DIV/0!	#DIV/0!	#DIV/0!	#DIV/0!	#DIV/0!
NTPC8	consumes total budget Y/N?	IND																						FALSE	FALSE	FALSE	FALSE	FALSE	FALSE	FALSE	FALSE	FALSE	FALSE	TRUE	TRUE	TRUE	FALSE	FALSE	FALSE	FALSE	FALSE	FALSE	FALSE	FALSE	FALSE	FALSE	FALSE	FALSE	FALSE
NTPC9	Cumulative overshoot	IND																						1	1.01251	1.02201	1.04794	1.07479	1.10549	1.13542	1.1659	1.19441	1.22208	1.24969	1.27782	1.30701	#DIV/0!	#DIV/0!	#DIV/0!	#DIV/0!	#DIV/0!	#DIV/0!	#DIV/0!	#DIV/0!	#DIV/0!	#DIV/0!	#DIV/0!	#DIV/0!	#DIV/0!
NTPC10	CBD Cumulative emissions	IND																						2.06014e+08	4.25931e+08	6.81892e+08	9.53078e+08	1.22609e+09	1.4955e+09	1.76777e+09	2.0429e+09	2.32027e+09	2.59988e+09	2.88172e+09	3.16581e+09	3.45213e+09
Adani Power	emissions in tCO2e (scope 1)	IND	Adani Power Annual Report 2025; https://nsearchives.nseindia.com/corporate/ADANIPOWER_31052025194330_APLBRSR2025.pdf?utm_source=chatgpt.com		2026;2027;2070	Target an emissions intensity of 0.84 in 2026 and 2027, net zero by 2070	2025																	58970000	54430000	4.75281e+07	4.90328e+07	7.29488e+07	8.64277e+07	9.11387e+07	9.75423e+07	1.00372e+08	1.03427e+08	1.06743e+08	1.10358e+08	1.14324e+08	TRUE
Adani Power1	output	IND	Adani Power Annual Report 2025; https://nsearchives.nseindia.com/corporate/ADANIPOWER_31052025194330_APLBRSR2025.pdf?utm_source=chatgpt.com	Scope 1 emissions in 2025 and 2024. Scope 1+2 emissions and Scope 1+2 emissions intensity where use to estimate output in 2025 and 2024.			2025																	6.93929e+07	6.40871e+07	5.59334e+07	5.77397e+07	8.58282e+07	1.01681e+08	1.08498e+08	1.16122e+08	1.22335e+08	1.29134e+08	1.36605e+08	1.44854e+08	1.54008e+08
Adani Power2	intensity	IND	Adani Power Annual Report 2023;https://companiesmarketcap.com/annual-reports/56413.ar.en.2022-2023.pdf	Scope 1 emissions in 2022 and 2023. Scope 1+2 emissions and Scope 1+2 emissions intensity where use to estimate output in 2022 and 2023.													TRUE							0.849798	0.849313	0.849727	0.849203	0.849939	0.849987	0.84	0.84	0.820465	0.80093	0.781395	0.76186	0.742326
Adani Power3	cumulative emissions	IND	Adani Power 2022; https://companiesmarketcap.com/annual-reports/56413.ar.en.2021-2022.pdf	Scope 1 emissions in 2021. Scope 1+2 emissions and Scope 1+2 emissions intensity where use to estimate output in 2021.																				58970000	113400000	1.60928e+08	2.09961e+08	2.8291e+08	3.69337e+08	4.60476e+08	5.58018e+08	6.5839e+08	7.61817e+08	8.6856e+08	9.78918e+08	1.09324e+09
Adani Power4	SDA intensity	IND	Adani Power ESG Report 2020; https://companiesmarketcap.com/esg-reports/56413.esg.en.2019-2020.pdf	Scope 1 emissions in 2020. Scope 1+2 emissions and Scope 1+2 emissions intensity where use to estimate output in 2020.				0.419798																0.849798	0.865897	0.992263	0.940217	0.746709	0.671657	0.628825	0.585993	0.554795	0.523596	0.492397	0.461199	0.43
Adani Power5	SDA cumulative emissions	IND																						58970000	1.14463e+08	1.69963e+08	2.24251e+08	2.8834e+08	3.56635e+08	4.24861e+08	4.92908e+08	5.60779e+08	6.28393e+08	6.95657e+08	7.62463e+08	8.28687e+08
Adani Power6	marketshare	IND																						0.0530836	0.0492972	0.0396334	0.0386224	0.0540785	0.0602031	0.0602031	0.0602031	0.0602031	0.0602031	0.0602031	0.0602031	0.0602031
Adani Power7	my	IND																						1	1.07681	1.33936	1.37443	0.981602	0.881741	0.881741	0.881741	0.881741	0.881741	0.881741	0.881741	0.881741	#DIV/0!	#DIV/0!	#DIV/0!	#DIV/0!	#DIV/0!	#DIV/0!	#DIV/0!	#DIV/0!	#DIV/0!	#DIV/0!	#DIV/0!	#DIV/0!	#DIV/0!
Adani Power8	consumes total budget Y/N?	IND																						FALSE	FALSE	FALSE	FALSE	FALSE	FALSE	FALSE	FALSE	FALSE	FALSE	TRUE	TRUE	TRUE	FALSE	FALSE	FALSE	FALSE	FALSE	FALSE	FALSE	FALSE	FALSE	FALSE	FALSE	FALSE	FALSE
Adani Power9	Cumulative overshoot	IND																						1	0.990715	0.94684	0.936275	0.981167	1.03562	1.08383	1.13209	1.17406	1.21233	1.24855	1.28389	1.31925	#DIV/0!	#DIV/0!	#DIV/0!	#DIV/0!	#DIV/0!	#DIV/0!	#DIV/0!	#DIV/0!	#DIV/0!	#DIV/0!	#DIV/0!	#DIV/0!	#DIV/0!
Adani Power10	CBD Cumulative emissions	IND																						4.9269e+07	9.41299e+07	1.33843e+08	1.72967e+08	2.28343e+08	2.90654e+08	3.53626e+08	4.17261e+08	4.81413e+08	5.46084e+08	6.11272e+08	6.76977e+08	7.43201e+08
DVC	DVC is a state-owned energy company operating thermal and hydro power plants. The company reports its electricity generation output but not its CO2 emissions so it could not be included in the analysis.
Indian companies	emissions in tCO2e (scope 1)	IND					NA																	346362981	352830000	3.78998e+08	4.13805e+08	4.66401e+08	4.9895e+08	5.19934e+08	5.44282e+08	5.58179e+08	5.73129e+08	5.89287e+08	6.06842e+08	6.26025e+08
Indian companies1	output	IND																						4.10912e+08	4.28517e+08	4.51222e+08	4.96961e+08	5.60049e+08	5.91825e+08	6.31504e+08	6.75875e+08	7.12038e+08	7.5161e+08	7.95096e+08	8.43107e+08	8.96388e+08
Indian companies2	intensity	IND																					TRUE	0.842912	0.823374	0.839937	0.832671	0.832786	0.84307	0.823327	0.805301	0.783918	0.762535	0.741152	0.719769	0.698386
Indian companies3	cumulative emissions	IND																						346362981	699192981	1.07819e+09	1.492e+09	1.9584e+09	2.45735e+09	2.97728e+09	3.52156e+09	4.07974e+09	4.65287e+09	5.24216e+09	5.849e+09	6.47502e+09
Indian companies4	SDA intensity	IND						0.412912																0.842912	0.809697	0.835948	0.77527	0.712694	0.671823	0.628962	0.5861	0.55488	0.52366	0.49244	0.46122	0.43
Indian companies5	SDA cumulative emissions	IND																						346362981	6.93332e+08	1.07053e+09	1.45581e+09	1.85495e+09	2.25255e+09	2.64975e+09	3.04588e+09	3.44097e+09	3.83456e+09	4.2261e+09	4.61496e+09	5.0004e+09
Indian companies6	marketshare	IND																						0.314336	0.329625	0.319728	0.332419	0.352874	0.350406	0.350406	0.350406	0.350406	0.350406	0.350406	0.350406	0.350406
Indian companies7	my	IND																						1	0.953617	0.983134	0.945601	0.890787	0.897061	0.897061	0.897061	0.897061	0.897061	0.897061	0.897061	0.897061
Indian companies8	consumes total budget Y/N?	IND																						FALSE	FALSE	FALSE	FALSE	FALSE	FALSE	FALSE	FALSE	FALSE	FALSE	TRUE	TRUE	TRUE
Indian companies9	Cumulative overshoot	IND																						1	1.00845	1.00716	1.02486	1.05577	1.09092	1.12361	1.15617	1.18564	1.2134	1.24043	1.2674	1.2949
Indian companies10	CBD Cumulative emissions	IND																						2.91748e+08	5.9171e+08	9.12077e+08	1.24882e+09	1.61016e+09	1.97283e+09	2.33936e+09	2.70974e+09	3.08313e+09	3.45953e+09	3.83895e+09	4.22139e+09	4.60683e+09
Eskom	emissions in tCO2e (scope 1)	ZAF	Annual Report 2025; https://www.eskom.co.za/wp-content/uploads/2025/10/Eskom-integrated-report-2025.pdf		2050	Net Zero by 2050	2024																		207230321	193157386	183904930	191585395	1.95321e+08	1.88505e+08	1.81783e+08	1.74507e+08	1.67891e+08	1.61918e+08	1.5643e+08	1.5127e+08	1.459e+08	1.40982e+08	1.36392e+08	1.30974e+08	1.25577e+08	1.20024e+08	1.13787e+08	1.0686e+08	9.88261e+07	9.01989e+07	8.09917e+07	7.11889e+07	6.07972e+07
Eskom1	output	ZAF	Annual Report 2025; https://www.eskom.co.za/wp-content/uploads/2025/10/Eskom-integrated-report-2025.pdf	Output in 2025, 2024, and 2023. Scope 1 emissions from electricity generation in 2022, 2023, and 2024			2025																		201400000	205688000	191307000	184576000	195702000	1.96742e+08	1.97976e+08	1.98691e+08	2.0026e+08	2.02792e+08	2.06231e+08	2.10507e+08	2.14977e+08	2.20714e+08	2.27763e+08	2.34339e+08	2.41966e+08	2.50538e+08	2.5911e+08	2.67672e+08	2.75052e+08	2.82421e+08	2.8982e+08	2.97199e+08	3.04579e+08
Eskom2	intensity	ZAF	Annual Report 2023; https://www.eskom.co.za/wp-content/uploads/2023/10/Eskom_integrated_report_2023.pdf	Output in 2022 and 2021. Scope 1 emissions from electricity generation in 2021 and 2020.													TRUE								1.02895	0.93908	0.961308	1.03798	0.998054	0.958131	0.918209	0.878287	0.838365	0.798443	0.758521	0.718599	0.678676	0.638754	0.598832	0.55891	0.518988	0.479066	0.439144	0.399221	0.359299	0.319377	0.279455	0.239533	0.199611
Eskom3	cumulative emissions	ZAF	https://www.eskom.co.za/wp-content/uploads/2021/11/2021sustainabilityReport.pdf	Scope1 emissions in 2020																					207230321	400387707	584292637	775878032	9.71199e+08	1.1597e+09	1.34149e+09	1.51599e+09	1.68389e+09	1.8458e+09	2.00223e+09	2.1535e+09	2.2994e+09	2.44039e+09	2.57678e+09	2.70775e+09	2.83333e+09	2.95335e+09	3.06714e+09	3.174e+09	3.27283e+09	3.36303e+09	3.44402e+09	3.51521e+09	3.576e+09
Eskom4	SDA intensity	ZAF						1.02895																	1.02895	0.964956	0.987287	1.07125	1.05771	0.983894	0.929834	0.927839	0.868112	0.717876	0.670612	0.622412	0.575611	0.527669	0.479379	0.434865	0.391075	0.348641	0.309015	0.271937	0.238176	0.206188	0.175809	0.146952	0.119493
Eskom5	SDA cumulative emissions	ZAF																							207230321	4.0571e+08	5.94585e+08	7.92313e+08	9.99309e+08	1.19288e+09	1.37697e+09	1.56132e+09	1.73517e+09	1.88075e+09	2.01905e+09	2.15007e+09	2.27381e+09	2.39028e+09	2.49946e+09	2.60137e+09	2.69599e+09	2.78334e+09	2.86341e+09	2.9362e+09	3.00171e+09	3.05994e+09	3.1109e+09	3.15457e+09	3.19097e+09
Eskom6	marketshare	ZAF																							0.927763	0.969703	0.921752	0.848525	0.858403	0.858403	0.858403	0.858403	0.858403	0.858403	0.858403	0.858403	0.858403	0.858403	0.858403	0.858403	0.858403	0.858403	0.858403	0.858403	0.858403	0.858403	0.858403	0.858403	0.858403
Eskom7	my	ZAF																							1	0.956749	1.00652	1.09338	1.0808	1.0808	1.0808	1.0808	1.0808	1.0808	1.0808	1.0808	1.0808	1.0808	1.0808	1.0808	1.0808	1.0808	1.0808	1.0808	1.0808	1.0808	1.0808	1.0808	1.0808
Eskom8	consumes total budget Y/N?	ZAF																							FALSE	FALSE	FALSE	FALSE	FALSE	FALSE	FALSE	FALSE	FALSE	FALSE	FALSE	FALSE	FALSE	FALSE	FALSE	FALSE	FALSE	FALSE	FALSE	FALSE	TRUE	TRUE	TRUE	TRUE	TRUE
Eskom9	Cumulative overshoot	ZAF
Eskom10	CBD Cumulative emissions	ZAF																							1.64725e+08	3.29627e+08	4.78789e+08	6.22537e+08	7.74775e+08	9.17141e+08	1.05253e+09	1.18811e+09	1.31597e+09	1.42304e+09	1.52476e+09	1.62112e+09	1.71213e+09	1.79778e+09	1.87808e+09	1.95303e+09	2.02263e+09	2.08687e+09	2.14575e+09	2.19929e+09	2.24747e+09	2.2903e+09	2.32777e+09	2.35989e+09	2.38666e+09
South African companies	emissions in tCO2e (scope 1)	ZAF																							207230321	193157386	183904930	191585395	1.95321e+08	1.88505e+08	1.81783e+08	1.74507e+08	1.67891e+08	1.61918e+08	1.5643e+08	1.5127e+08	1.459e+08	1.40982e+08	1.36392e+08	1.30974e+08	1.25577e+08	1.20024e+08	1.13787e+08	1.0686e+08	9.88261e+07	9.01989e+07	8.09917e+07	7.11889e+07	6.07972e+07
South African companies1	output	ZAF																							201400000	205688000	191307000	184576000	195702000	1.96742e+08	1.97976e+08	1.98691e+08	2.0026e+08	2.02792e+08	2.06231e+08	2.10507e+08	2.14977e+08	2.20714e+08	2.27763e+08	2.34339e+08	2.41966e+08	2.50538e+08	2.5911e+08	2.67672e+08	2.75052e+08	2.82421e+08	2.8982e+08	2.97199e+08	3.04579e+08
South African companies2	intensity	ZAF															TRUE								1.02895	0.93908	0.961308	1.03798	0.998054	0.958131	0.918209	0.878287	0.838365	0.798443	0.758521	0.718599	0.678676	0.638754	0.598832	0.55891	0.518988	0.479066	0.439144	0.399221	0.359299	0.319377	0.279455	0.239533	0.199611
South African companies3	cumulative emissions	ZAF																							207230321	400387707	584292637	775878032	9.71199e+08	1.1597e+09	1.34149e+09	1.51599e+09	1.68389e+09	1.8458e+09	2.00223e+09	2.1535e+09	2.2994e+09	2.44039e+09	2.57678e+09	2.70775e+09	2.83333e+09	2.95335e+09	3.06714e+09	3.174e+09	3.27283e+09	3.36303e+09	3.44402e+09	3.51521e+09	3.576e+09
South African companies4	SDA intensity	ZAF						1.02895																	1.02895	0.964956	0.987287	1.07125	1.05771	0.983894	0.929834	0.927839	0.868112	0.717876	0.670612	0.622412	0.575611	0.527669	0.479379	0.434865	0.391075	0.348641	0.309015	0.271937	0.238176	0.206188	0.175809	0.146952	0.119493
South African companies5	SDA cumulative emissions	ZAF																							207230321	4.0571e+08	5.94585e+08	7.92313e+08	9.99309e+08	1.19288e+09	1.37697e+09	1.56132e+09	1.73517e+09	1.88075e+09	2.01905e+09	2.15007e+09	2.27381e+09	2.39028e+09	2.49946e+09	2.60137e+09	2.69599e+09	2.78334e+09	2.86341e+09	2.9362e+09	3.00171e+09	3.05994e+09	3.1109e+09	3.15457e+09	3.19097e+09
South African companies6	marketshare	ZAF																							0.927763	0.969703	0.921752	0.848525	0.858403	0.858403	0.858403	0.858403	0.858403	0.858403	0.858403	0.858403	0.858403	0.858403	0.858403	0.858403	0.858403	0.858403	0.858403	0.858403	0.858403	0.858403	0.858403	0.858403	0.858403
South African companies7	my	ZAF																							1	0.956749	1.00652	1.09338	1.0808	1.0808	1.0808	1.0808	1.0808	1.0808	1.0808	1.0808	1.0808	1.0808	1.0808	1.0808	1.0808	1.0808	1.0808	1.0808	1.0808	1.0808	1.0808	1.0808	1.0808
South African companies8	consumes total budget Y/N?	ZAF																							FALSE	FALSE	FALSE	FALSE	FALSE	FALSE	FALSE	FALSE	FALSE	FALSE	FALSE	FALSE	FALSE	FALSE	FALSE	FALSE	FALSE	FALSE	FALSE	FALSE	TRUE	TRUE	TRUE	TRUE	TRUE
South African companies9	Cumulative overshoot	ZAF																							1.69494e+08	3.2435e+08	4.6774e+08	6.16947e+08	7.68889e+08	9.05294e+08	1.02961e+09	1.14869e+09	1.25588e+09	1.34137e+09	1.41852e+09	1.48777e+09	1.54953e+09	1.60425e+09	1.65233e+09	1.69422e+09	1.73034e+09	1.76112e+09	1.78698e+09	1.80835e+09	1.82566e+09	1.83934e+09	1.84981e+09	1.85751e+09	1.86285e+09
South African companies10	CBD Cumulative emissions	ZAF																							1.64725e+08	3.29627e+08	4.78789e+08	6.22537e+08	7.74775e+08	9.17141e+08	1.05253e+09	1.18811e+09	1.31597e+09	1.42304e+09	1.52476e+09	1.62112e+09	1.71213e+09	1.79778e+09	1.87808e+09	1.95303e+09	2.02263e+09	2.08687e+09	2.14575e+09	2.19929e+09	2.24747e+09	2.2903e+09	2.32777e+09	2.35989e+09	2.38666e+09
Meralco	emissions in tCO2e (scope 1)	PHL	Integrated Annual Report 2024; https://meralcomain.s3.ap-southeast-1.amazonaws.com/2025-05/one_meralco_2024_integrated_report_0.pdf	No information is provided on the business as usual scenario so it is assumed that the intensity will remain constant over the period. "14% reduction in Group-wide overall emissions by 2030 vs. business as usual (“BAU”) 9% reduction in Group-wide Scope 1 emissions by 2030 vs. BAU"	2030																		2.40452e+06	3.06206e+06	6.54484e+06	6257204	6443711	6630953	6.97005e+06	7.35806e+06	7.78357e+06	8.25201e+06	8.7574e+06	9.25736e+06	9.75786e+06	1.02546e+07	1.07942e+07	1.13496e+07	1.19713e+07	1.25842e+07	1.32902e+07	1.39771e+07	1.46352e+07	1.5559e+07	1.63334e+07	1.71447e+07	1.79838e+07	1.87875e+07	1.97619e+07
Meralco1	output	PHL	Integrated Report 2024; https://www.meralco.com.ph/sites/default/files/2023-07/9dbe0013c07df9323ad8578505c9c557.pdf#page=62	Emissions and output in 2024, 2023, and 2022																			1.02213e+07	1.19341e+07	1.33436e+07	12513390	13209100	13562710	1.42563e+07	1.50499e+07	1.59202e+07	1.68784e+07	1.79121e+07	1.89347e+07	1.99584e+07	2.09743e+07	2.2078e+07	2.3214e+07	2.44856e+07	2.57394e+07	2.71832e+07	2.85882e+07	2.99342e+07	3.18238e+07	3.34077e+07	3.50672e+07	3.67834e+07	3.84273e+07	4.04203e+07
Meralco2	intensity	PHL	Integrated Report 2022; https://www.meralco.com.ph/sites/default/files/2023-07/9dbe0013c07df9323ad8578505c9c557.pdf#page=62	Emissions and output in 2021 and 2020													TRUE						0.235244	0.256581	0.490487	0.500041	0.487824	0.488911	0.488911	0.488911	0.488911	0.488911	0.488911	0.488911	0.488911	0.488911	0.488911	0.488911	0.488911	0.488911	0.488911	0.488911	0.488911	0.488911	0.488911	0.488911	0.488911	0.488911	0.488911
Meralco3	cumulative emissions	PHL	Sustainability Report 2021; https://meralcomain.s3.ap-southeast-1.amazonaws.com/images/ckeditor-documents/SR%20MERALCO%202021_072222_DIGITALwithoutSIGNATURES_high.pdf	Emissions and output in 2019																			2.40452e+06	5.46658e+06	1.20114e+07	1.82686e+07	2.47123e+07	3.13433e+07	3.83133e+07	4.56714e+07	5.3455e+07	6.1707e+07	7.04644e+07	7.97217e+07	8.94796e+07	9.97342e+07	1.10528e+08	1.21878e+08	1.33849e+08	1.46433e+08	1.59724e+08	1.73701e+08	1.88336e+08	2.03895e+08	2.20228e+08	2.37373e+08	2.55357e+08	2.74144e+08	2.93906e+08
Meralco4	SDA intensity	PHL						-0.0339431															0.235244	0.240789	0.24273	0.239176	0.238591	0.240413	0.241648	0.242785	0.24334	0.243922	0.246231	0.248258	0.250111	0.25176	0.25348	0.255059	0.256627	0.258028	0.259533	0.260871	0.262098	0.263618	0.264398	0.265061	0.265734	0.266264	0.266919
Meralco5	SDA cumulative emissions	PHL																					2.40452e+06	5.27812e+06	8.51701e+06	1.15099e+07	1.46615e+07	1.79221e+07	2.13671e+07	2.5021e+07	2.8895e+07	3.30121e+07	3.74226e+07	4.21232e+07	4.7115e+07	5.23955e+07	5.79919e+07	6.39128e+07	7.01965e+07	7.6838e+07	8.38929e+07	9.13507e+07	9.91964e+07	1.07586e+08	1.16419e+08	1.25714e+08	1.35488e+08	1.4572e+08	1.56509e+08
Meralco6	marketshare	PHL																					0.0983978	0.119719	0.128794	0.114532	0.115474	0.111152	0.111152	0.111152	0.111152	0.111152	0.111152	0.111152	0.111152	0.111152	0.111152	0.111152	0.111152	0.111152	0.111152	0.111152	0.111152	0.111152	0.111152	0.111152	0.111152	0.111152	0.111152
Meralco7	my	PHL																					1	0.821909	0.763991	0.859127	0.852119	0.885258	0.885258	0.885258	0.885258	0.885258	0.885258	0.885258	0.885258	0.885258	0.885258	0.885258	0.885258	0.885258	0.885258	0.885258	0.885258	0.885258	0.885258	0.885258	0.885258	0.885258	0.885258
Meralco8	consumes total budget Y/N?	PHL																					FALSE	FALSE	FALSE	FALSE	FALSE	FALSE	FALSE	FALSE	FALSE	FALSE	FALSE	FALSE	FALSE	FALSE	FALSE	FALSE	FALSE	FALSE	FALSE	FALSE	FALSE	FALSE	TRUE	TRUE	TRUE	TRUE	TRUE
Meralco9	Cumulative overshoot	PHL
Meralco10	CBD Cumulative emissions	PHL																					6.54557e+06	1.42674e+07	2.29127e+07	3.10614e+07	3.98039e+07	4.82759e+07	5.69635e+07	6.59234e+07	7.52924e+07	8.51037e+07	9.50051e+07	1.04998e+08	1.15074e+08	1.25235e+08	1.35462e+08	1.45762e+08	1.56153e+08	1.6663e+08	1.77189e+08	1.87822e+08	1.98502e+08	2.09258e+08	2.20227e+08	2.31455e+08	2.42926e+08	2.54658e+08	2.66671e+08
San Miguel Corporation	emissions in tCO2e (scope 1)	PHL	https://sanmiguel.com.ph/smcannualreport2024/SMC_2024_SUSTAINABILITY_REPORT.pdf	Net Zero by 2050 at the group level applies to power generation	2050	Net Zero	2023																9720000	9170000	1.23446e+07	1.23176e+07	1.21839e+07	1.24358e+07	1.2569e+07	1.27379e+07	1.29131e+07	1.3095e+07	1.32653e+07	1.33549e+07	1.33731e+07	1.33141e+07	1.32362e+07	1.30985e+07	1.29525e+07	1.2708e+07	1.24623e+07	1.20982e+07	1.16122e+07	1.12229e+07	1.06033e+07	9.89336e+06	9.08034e+06	8.131e+06	7.12724e+06
San Miguel Corporation1	output	PHL	https://smcglobalpower.com.ph/storage/files/reports/Sustainability%20Report/2023%20Sustainability%20Scorecard.pdf				2023																9641270	10182830	1.36625e+07	1.33019e+07	1.47571e+07	1.57415e+07	1.65465e+07	1.74676e+07	1.84777e+07	1.95898e+07	2.07895e+07	2.19764e+07	2.31646e+07	2.43437e+07	2.56247e+07	2.69432e+07	2.8419e+07	2.98742e+07	3.155e+07	3.31807e+07	3.4743e+07	3.69361e+07	3.87744e+07	4.07005e+07	4.26924e+07	4.46004e+07	4.69135e+07
San Miguel Corporation2	intensity	PHL	https://smcglobalpower.com.ph/storage/files/reports/Sustainability%20Report/smgp-2019-2020-sustainability-reportpdf.pdf	Output and emissions in 2019 and 2020			2023										TRUE						1.00817	0.900536	0.90354	0.926003	0.825626	0.79	0.759615	0.729231	0.698846	0.668462	0.638077	0.607692	0.577308	0.546923	0.516538	0.486154	0.455769	0.425385	0.395	0.364615	0.334231	0.303846	0.273462	0.243077	0.212692	0.182308	0.151923
San Miguel Corporation3	cumulative emissions	PHL																					9720000	18890000	3.12346e+07	4.35522e+07	5.5736e+07	6.81718e+07	8.07408e+07	9.34787e+07	1.06392e+08	1.19487e+08	1.32752e+08	1.46107e+08	1.5948e+08	1.72794e+08	1.8603e+08	1.99129e+08	2.12081e+08	2.24789e+08	2.37252e+08	2.4935e+08	2.60962e+08	2.72185e+08	2.82788e+08	2.92682e+08	3.01762e+08	3.09893e+08	3.1702e+08
San Miguel Corporation4	SDA intensity	PHL						0.738978															1.00817	0.952657	0.799826	0.84895	0.831601	0.778311	0.756448	0.736339	0.726523	0.716215	0.675366	0.639502	0.606715	0.577536	0.5471	0.51916	0.491423	0.466641	0.440008	0.416341	0.394621	0.367732	0.35393	0.342207	0.33029	0.320918	0.309322
San Miguel Corporation5	SDA cumulative emissions	PHL																					9720000	1.94207e+07	3.03483e+07	4.1641e+07	5.3913e+07	6.61648e+07	7.86813e+07	9.15434e+07	1.04968e+08	1.18998e+08	1.33039e+08	1.47093e+08	1.61147e+08	1.75206e+08	1.89226e+08	2.03214e+08	2.17179e+08	2.3112e+08	2.45002e+08	2.58817e+08	2.72527e+08	2.8611e+08	2.99833e+08	3.13761e+08	3.27862e+08	3.42175e+08	3.56686e+08
San Miguel Corporation6	marketshare	PHL																					0.0928136	0.10215	0.131873	0.121749	0.129007	0.129007	0.129007	0.129007	0.129007	0.129007	0.129007	0.129007	0.129007	0.129007	0.129007	0.129007	0.129007	0.129007	0.129007	0.129007	0.129007	0.129007	0.129007	0.129007	0.129007	0.129007	0.129007
San Miguel Corporation7	my	PHL																					1	0.908597	0.703813	0.762333	0.719444	0.719444	0.719444	0.719444	0.719444	0.719444	0.719444	0.719444	0.719444	0.719444	0.719444	0.719444	0.719444	0.719444	0.719444	0.719444	0.719444	0.719444	0.719444	0.719444	0.719444	0.719444	0.719444
San Miguel Corporation8	consumes total budget Y/N?	PHL																					FALSE	FALSE	FALSE	FALSE	FALSE	FALSE	FALSE	FALSE	FALSE	FALSE	FALSE	FALSE	FALSE	FALSE	FALSE	FALSE	FALSE	FALSE	FALSE	FALSE	FALSE	FALSE	FALSE	FALSE	FALSE	FALSE	FALSE
San Miguel Corporation9	Cumulative overshoot	PHL
San Miguel Corporation10	CBD Cumulative emissions	PHL																					6.1741e+06	1.27628e+07	2.16147e+07	3.02769e+07	4.0044e+07	4.98769e+07	5.99601e+07	7.03594e+07	8.12334e+07	9.26209e+07	1.04113e+08	1.15711e+08	1.27405e+08	1.39199e+08	1.51069e+08	1.63024e+08	1.75084e+08	1.87244e+08	1.995e+08	2.1184e+08	2.24235e+08	2.3672e+08	2.49451e+08	2.62482e+08	2.75796e+08	2.89413e+08	3.03356e+08
Aboitiz	emissions in tCO2e (scope 1)	PHL		No target			2024																3232757	9163350	12286632	13159185	16483352	17065896	1.79386e+07	1.89372e+07	2.00324e+07	2.1238e+07	2.25387e+07	2.38254e+07	2.51135e+07	2.63919e+07	2.77807e+07	2.92101e+07	3.08101e+07	3.23877e+07	3.42045e+07	3.59724e+07	3.76661e+07	4.00437e+07	4.20368e+07	4.41249e+07	4.62844e+07	4.83529e+07	5.08606e+07
Aboitiz1	output	PHL	https://aboitizpower.com/investors/annual-reports				2024																20480000	20363000	26031000	30251000	35372000	36004000	3.78452e+07	3.9952e+07	4.22624e+07	4.48058e+07	4.75499e+07	5.02646e+07	5.29821e+07	5.5679e+07	5.8609e+07	6.16246e+07	6.50002e+07	6.83285e+07	7.21614e+07	7.58911e+07	7.94643e+07	8.44805e+07	8.86852e+07	9.30905e+07	9.76463e+07	1.0201e+08	1.07301e+08
Aboitiz2	intensity	PHL	https://aboitizpower.com/esg-sustainability	Generation from 2022 to 2024			2024										TRUE						0.45	0.45	0.472	0.435	0.466	0.474	0.474	0.474	0.474	0.474	0.474	0.474	0.474	0.474	0.474	0.474	0.474	0.474	0.474	0.474	0.474	0.474	0.474	0.474	0.474	0.474	0.474
Aboitiz3	cumulative emissions	PHL	https://aboitizpower.com/esg-sustainability/environment#ghgEmission	Intensity from 2020 to 2024																			3232757	12396107	24682739	37841924	54325276	71391172	8.93298e+07	1.08267e+08	1.28299e+08	1.49537e+08	1.72076e+08	1.95901e+08	2.21015e+08	2.47407e+08	2.75188e+08	3.04398e+08	3.35208e+08	3.67595e+08	4.018e+08	4.37772e+08	4.75438e+08	5.15482e+08	5.57519e+08	6.01644e+08	6.47928e+08	6.96281e+08	7.47142e+08
Aboitiz4	SDA intensity	PHL	Annual Report 2020; https://aboitizpower.com/investors/annual-reports	Output in 2019 and 2020. Intensity in 2019 was assumed to be the same as the one in 2020 due to a lack of data for 2019.				0.180812															0.45	0.446827	0.413941	0.401688	0.39114	0.384881	0.379913	0.375343	0.373113	0.370771	0.361488	0.353338	0.345888	0.339257	0.332341	0.325992	0.319689	0.314057	0.308005	0.302627	0.297691	0.291581	0.288445	0.28578	0.283072	0.280943	0.278308
Aboitiz5	SDA cumulative emissions	PHL																					9216000	1.83147e+07	2.909e+07	4.12415e+07	5.50769e+07	6.89342e+07	8.3312e+07	9.83078e+07	1.14076e+08	1.30689e+08	1.47878e+08	1.65638e+08	1.83964e+08	2.02854e+08	2.22332e+08	2.42421e+08	2.63201e+08	2.8466e+08	3.06886e+08	3.29852e+08	3.53508e+08	3.78141e+08	4.03722e+08	4.30325e+08	4.57966e+08	4.86625e+08	5.16488e+08
Aboitiz6	marketshare	PHL																					0.197155	0.204274	0.251256	0.276881	0.309223	0.295066	0.295066	0.295066	0.295066	0.295066	0.295066	0.295066	0.295066	0.295066	0.295066	0.295066	0.295066	0.295066	0.295066	0.295066	0.295066	0.295066	0.295066	0.295066	0.295066	0.295066	0.295066
Aboitiz7	my	PHL																					1	0.965148	0.784677	0.712056	0.637581	0.668171	0.668171	0.668171	0.668171	0.668171	0.668171	0.668171	0.668171	0.668171	0.668171	0.668171	0.668171	0.668171	0.668171	0.668171	0.668171	0.668171	0.668171	0.668171	0.668171	0.668171	0.668171
Aboitiz8	consumes total budget Y/N?	PHL																					FALSE	FALSE	FALSE	FALSE	FALSE	FALSE	FALSE	FALSE	FALSE	FALSE	FALSE	FALSE	FALSE	FALSE	FALSE	FALSE	FALSE	FALSE	FALSE	FALSE	FALSE	FALSE	FALSE	FALSE	FALSE	TRUE	TRUE
Aboitiz9	Cumulative overshoot	PHL
Aboitiz10	CBD Cumulative emissions	PHL																					1.3115e+07	2.62906e+07	4.31562e+07	6.28555e+07	8.62668e+07	1.08757e+08	1.31819e+08	1.55604e+08	1.80476e+08	2.06521e+08	2.32806e+08	2.59332e+08	2.8608e+08	3.13055e+08	3.40204e+08	3.67548e+08	3.9513e+08	4.22943e+08	4.50975e+08	4.79201e+08	5.07551e+08	5.36104e+08	5.65224e+08	5.95029e+08	6.2548e+08	6.56624e+08	6.88515e+08
FirstGen	emissions in tCO2e (scope 1)	PHL	https://www.firstgen.com.ph/static-assets/assets/file-uploads/investor-relations/reports-and-presentations/reports/FirstGenIR_2024.pdf				2024																5.70571e+06	5.34105e+06	6.03294e+06	6.60532e+06	6.9668e+06	5.32961e+06	5.38669e+06	5.4591e+06	5.53418e+06	5.61214e+06	5.68513e+06	5.72352e+06	5.73132e+06	5.70605e+06	5.67264e+06	5.61365e+06	5.55108e+06	5.4463e+06	5.34097e+06	5.18494e+06	4.97664e+06	4.80981e+06	4.54428e+06	4.24001e+06	3.89157e+06	3.48471e+06	3.05453e+06
FirstGen1	output	PHL	https://www.firstgen.com.ph/static-assets/assets/file-uploads/investor-relations/reports-and-presentations/reports/FirstGenIR_2024.pdf				2024																22299000	19684415	19805300	22352400	21570800	18293400	1.92289e+07	2.02993e+07	2.14732e+07	2.27656e+07	2.41598e+07	2.55391e+07	2.69199e+07	2.82902e+07	2.97789e+07	3.13111e+07	3.30262e+07	3.47173e+07	3.66648e+07	3.85598e+07	4.03753e+07	4.2924e+07	4.50604e+07	4.72987e+07	4.96135e+07	5.18308e+07	5.45189e+07
FirstGen2	intensity	PHL	https://www.firstgen.com.ph/static-assets/assets/file-uploads/investor-relations/reports-and-presentations/reports/FirstGen_IntegratedReport2022.pdf				2024										TRUE						0.255873	0.271334	0.304612	0.295508	0.322973	0.291341	0.280135	0.26893	0.257724	0.246519	0.235314	0.224108	0.212903	0.201697	0.190492	0.179287	0.168081	0.156876	0.14567	0.134465	0.12326	0.112054	0.100849	0.0896433	0.0784379	0.0672325	0.056027
FirstGen3	cumulative emissions	PHL	Integrated Report 2020; https://www.firstgen.com.ph/static-assets/assets/file-uploads/investor-relations/reports-and-presentations/reports/First%20Gen%202020%20Integrated%20Report%20Final.pdf	Output and emissions in 2020, emissions in 2019																			5.70571e+06	1.10468e+07	1.70797e+07	2.3685e+07	3.06518e+07	3.59814e+07	4.13681e+07	4.68272e+07	5.23614e+07	5.79735e+07	6.36587e+07	6.93822e+07	7.51135e+07	8.08196e+07	8.64922e+07	9.21059e+07	9.76569e+07	1.03103e+08	1.08444e+08	1.13629e+08	1.18606e+08	1.23416e+08	1.2796e+08	1.322e+08	1.36091e+08	1.39576e+08	1.42631e+08
FirstGen4	SDA intensity	PHL						-0.0133144															0.255873	0.254454	0.253933	0.25481	0.253154	0.250931	0.251715	0.252436	0.252788	0.253158	0.254623	0.255909	0.257084	0.258131	0.259222	0.260224	0.261219	0.262107	0.263062	0.263911	0.26469	0.265654	0.266149	0.266569	0.266997	0.267333	0.267748
FirstGen5	SDA cumulative emissions	PHL																					5.70571e+06	1.07145e+07	1.57437e+07	2.14393e+07	2.69001e+07	3.14905e+07	3.63307e+07	4.14549e+07	4.68831e+07	5.26464e+07	5.8798e+07	6.53337e+07	7.22544e+07	7.95569e+07	8.72763e+07	9.54242e+07	1.04051e+08	1.13151e+08	1.22796e+08	1.32972e+08	1.43659e+08	1.55062e+08	1.67055e+08	1.79663e+08	1.9291e+08	2.06766e+08	2.21363e+08
FirstGen6	marketshare	PHL																					0.214666	0.197467	0.191164	0.204587	0.188572	0.149921	0.149921	0.149921	0.149921	0.149921	0.149921	0.149921	0.149921	0.149921	0.149921	0.149921	0.149921	0.149921	0.149921	0.149921	0.149921	0.149921	0.149921	0.149921	0.149921	0.149921	0.149921
FirstGen7	my	PHL																					1	1.0871	1.12294	1.04927	1.13837	1.43186	1.43186	1.43186	1.43186	1.43186	1.43186	1.43186	1.43186	1.43186	1.43186	1.43186	1.43186	1.43186	1.43186	1.43186	1.43186	1.43186	1.43186	1.43186	1.43186	1.43186	1.43186
FirstGen8	consumes total budget Y/N?	PHL																					FALSE	FALSE	FALSE	FALSE	FALSE	FALSE	FALSE	FALSE	FALSE	FALSE	FALSE	FALSE	FALSE	FALSE	FALSE	FALSE	FALSE	FALSE	FALSE	FALSE	FALSE	FALSE	FALSE	FALSE	FALSE	FALSE	FALSE
FirstGen9	Cumulative overshoot	PHL
FirstGen10	CBD Cumulative emissions	PHL																					1.42799e+07	2.70164e+07	3.98483e+07	5.44041e+07	6.8681e+07	8.0108e+07	9.18258e+07	1.03911e+08	1.16548e+08	1.29781e+08	1.43136e+08	1.56614e+08	1.70205e+08	1.8391e+08	1.97705e+08	2.11598e+08	2.25613e+08	2.39744e+08	2.53987e+08	2.68328e+08	2.82733e+08	2.97241e+08	3.12036e+08	3.2718e+08	3.42652e+08	3.58476e+08	3.74679e+08
Philippine companies	emissions in tCO2e (scope 1)	PHL																					2.1063e+07	2.67365e+07	3.7209e+07	3.83393e+07	4.20777e+07	4.14622e+07	4.28643e+07	4.44923e+07	4.62632e+07	4.81971e+07	5.02465e+07	5.21612e+07	5.39758e+07	5.56666e+07	5.74837e+07	5.92718e+07	6.12849e+07	6.31263e+07	6.52979e+07	6.72326e+07	6.88901e+07	7.16354e+07	7.35177e+07	7.5403e+07	7.72401e+07	7.87561e+07	8.08043e+07
Philippine companies1	output	PHL																					6.26416e+07	6.21644e+07	7.28423e+07	7.84187e+07	8.4909e+07	8.36016e+07	8.78769e+07	9.27688e+07	9.81335e+07	1.0404e+08	1.10411e+08	1.16715e+08	1.23025e+08	1.29287e+08	1.36091e+08	1.43093e+08	1.50931e+08	1.58659e+08	1.67559e+08	1.7622e+08	1.84517e+08	1.96164e+08	2.05928e+08	2.16157e+08	2.26736e+08	2.36869e+08	2.49154e+08
Philippine companies2	intensity	PHL															TRUE						0.336246	0.430093	0.510816	0.488905	0.495562	0.49595	0.487777	0.479604	0.471431	0.463258	0.455085	0.446912	0.438739	0.430565	0.422392	0.414219	0.406046	0.397873	0.3897	0.381527	0.373354	0.365181	0.357008	0.348835	0.340661	0.332488	0.324315
Philippine companies3	cumulative emissions	PHL																					2.1063e+07	4.77995e+07	8.50084e+07	1.23348e+08	1.65425e+08	2.06888e+08	2.49752e+08	2.94244e+08	3.40508e+08	3.88705e+08	4.38951e+08	4.91112e+08	5.45088e+08	6.00755e+08	6.58238e+08	7.1751e+08	7.78795e+08	8.41921e+08	9.07219e+08	9.74452e+08	1.04334e+09	1.11498e+09	1.1885e+09	1.2639e+09	1.34114e+09	1.41989e+09	1.5007e+09
Philippine companies4	SDA intensity	PHL						0.0670584															0.336246	0.335195	0.327868	0.32717	0.326818	0.325708	0.323281	0.321048	0.319959	0.318814	0.314279	0.310298	0.306658	0.303419	0.30004	0.296938	0.293859	0.291108	0.288151	0.285524	0.283112	0.280127	0.278595	0.277294	0.275971	0.27493	0.273643
Philippine companies5	SDA cumulative emissions	PHL																					2.1063e+07	4.19002e+07	6.57829e+07	9.14391e+07	1.19189e+08	1.46419e+08	1.74827e+08	2.04611e+08	2.36009e+08	2.69179e+08	3.03879e+08	3.40095e+08	3.77822e+08	4.1705e+08	4.57882e+08	5.00372e+08	5.44725e+08	5.90912e+08	6.39194e+08	6.89509e+08	7.41748e+08	7.96699e+08	8.54069e+08	9.14008e+08	9.76581e+08	1.0417e+09	1.10988e+09
Philippine companies6	marketshare	PHL																					0.603032	0.62361	0.703088	0.717749	0.742277	0.685147	0.685147	0.685147	0.685147	0.685147	0.685147	0.685147	0.685147	0.685147	0.685147	0.685147	0.685147	0.685147	0.685147	0.685147	0.685147	0.685147	0.685147	0.685147	0.685147	0.685147	0.685147
Philippine companies7	my	PHL																					1	0.967001	0.857691	0.84017	0.812408	0.88015	0.88015	0.88015	0.88015	0.88015	0.88015	0.88015	0.88015	0.88015	0.88015	0.88015	0.88015	0.88015	0.88015	0.88015	0.88015	0.88015	0.88015	0.88015	0.88015	0.88015	0.88015
Philippine companies8	consumes total budget Y/N?	PHL																					FALSE	FALSE	FALSE	FALSE	FALSE	FALSE	FALSE	FALSE	FALSE	FALSE	FALSE	FALSE	FALSE	FALSE	FALSE	FALSE	FALSE	FALSE	FALSE	FALSE	FALSE	FALSE	FALSE	FALSE	FALSE	FALSE	TRUE
Philippine companies9	Cumulative overshoot	PHL
Philippine companies10	CBD Cumulative emissions	PHL																					4.01146e+07	8.03372e+07	1.27532e+08	1.78598e+08	2.34796e+08	2.87018e+08	3.40569e+08	3.95798e+08	4.53549e+08	5.14027e+08	5.7506e+08	6.36655e+08	6.98763e+08	7.61399e+08	8.2444e+08	8.87932e+08	9.5198e+08	1.01656e+09	1.08165e+09	1.14719e+09	1.21302e+09	1.27932e+09	1.34694e+09	1.41615e+09	1.48685e+09	1.55917e+09	1.63322e+09
TNB	emissions in tCO2e (scope 1)	MYS	https://www.tnb.com.my/assets/annual_report/TNB_Sustainability_Report_2024.pdf	5% reduction in intensity every year from 2024. 35% emissions intensity reduction by 2035, from base year FY2020. Net zero emissions by 2050. These targets are group-wide and the same rate was applied to operations in Malaysia.																			33790000	39040000	39770000	38580000	38920000	38750000	3.74567e+07	3.69691e+07	3.64528e+07	3.59072e+07	3.53314e+07	3.47244e+07
TNB1	output	MYS	https://www.tnb.com.my/assets/annual_report/TNB_Sustainability_Report_2022.pdf																				6.03393e+07	6.84912e+07	7.36481e+07	7.02988e+07	7.12168e+07	6.95566e+07	7.07739e+07	7.20124e+07	7.32726e+07	7.45549e+07	7.58596e+07	7.71872e+07
TNB2	intensity	MYS															TRUE						0.56	0.57	0.54	0.5488	0.5465	0.5571	0.529245	0.51337	0.497496	0.481621	0.465747	0.449872
TNB3	cumulative emissions	MYS																					33790000	72830000	112600000	151180000	190100000	228850000	2.66307e+08	3.03276e+08	3.39729e+08	3.75636e+08	4.10967e+08	4.45692e+08
TNB4	SDA intensity	MYS						0.101733															0.56	0.542282	0.531109	0.528958	0.522419	0.518105	0.511249	0.500094	0.489225	0.478635	0.468318	0.458267
TNB5	SDA cumulative emissions	MYS																					33790000	7.09316e+07	1.10047e+08	1.47232e+08	1.84437e+08	2.20475e+08	2.56658e+08	2.92671e+08	3.28517e+08	3.64202e+08	3.99728e+08	4.35101e+08
TNB6	marketshare	MYS																					0.338035	0.377105	0.398524	0.373858	0.372226	0.357296	0.357296	0.357296	0.357296	0.357296	0.357296	0.357296
TNB7	my	MYS																					1	0.896395	0.848217	0.904181	0.908145	0.946093	0.946093	0.946093	0.946093	0.946093	0.946093	0.946093
TNB8	consumes total budget Y/N?	MYS																					FALSE	FALSE	FALSE	FALSE	FALSE	FALSE	FALSE	FALSE	FALSE	FALSE	FALSE	TRUE
TNB9	Cumulative overshoot	MYS
TNB10	CBD Cumulative emissions	MYS																					3.71839e+07	7.85397e+07	1.22112e+08	1.62862e+08	2.03311e+08	2.42018e+08	2.80606e+08	3.18551e+08	3.55852e+08	3.92511e+08	4.28526e+08	4.63899e+08
Malakoff	emissions in tCO2e (scope 1)	MYS	https://www.malakoff.com.my/wp-content/uploads/2025/04/Sustainabiliy-Statement-2024.pdf		2031	Reach an intensity of 0.53 in 2031 and net zero in 2050	2024																19870000	19610000	1.615e+07	16816786	16476659	19063308	1.85163e+07	1.79443e+07	1.73467e+07	1.67226e+07	1.60713e+07	1.53922e+07
Malakoff1	output	MYS		output between 2019 and 2022 was estimated			2024																2.61447e+07	2.25402e+07	1.81461e+07	18565504	20510169	24537892	2.49673e+07	2.54042e+07	2.58488e+07	2.63012e+07	2.67614e+07	2.72298e+07
Malakoff2	intensity	MYS					2024										TRUE						0.76	0.87	0.89	0.905808	0.803341	0.776893	0.741622	0.706352	0.671082	0.635811	0.600541	0.56527
Malakoff3	cumulative emissions	MYS					2024																19870000	39480000	55630000	72446786	88923445	107986753	1.26503e+08	1.44447e+08	1.61794e+08	1.78517e+08	1.94588e+08	2.0998e+08
Malakoff4	SDA intensity	MYS						0.301733															0.76	0.786348	0.8382	0.802262	0.744532	0.67625	0.651273	0.610639	0.571045	0.532467	0.494882	0.458267
Malakoff5	SDA cumulative emissions	MYS																					19870000	3.75945e+07	5.28045e+07	6.76989e+07	8.29694e+07	9.95631e+07	1.15824e+08	1.31337e+08	1.46097e+08	1.60102e+08	1.73346e+08	1.85824e+08
Malakoff6	marketshare	MYS																					0.146469	0.124104	0.0981919	0.0987337	0.1072	0.126045	0.126045	0.126045	0.126045	0.126045	0.126045	0.126045
Malakoff7	my	MYS																					1	1.18021	1.49166	1.48348	1.36632	1.16203	1.16203	1.16203	1.16203	1.16203	1.16203	1.16203
Malakoff8	consumes total budget Y/N?	MYS																					FALSE	FALSE	FALSE	FALSE	FALSE	FALSE	FALSE	FALSE	FALSE	FALSE	TRUE	TRUE
Malakoff9	Cumulative overshoot	MYS
Malakoff10	CBD Cumulative emissions	MYS																					1.61116e+07	2.97217e+07	4.04573e+07	5.12193e+07	6.28683e+07	7.65232e+07	9.01361e+07	1.03522e+08	1.16681e+08	1.29614e+08	1.42319e+08	1.54797e+08
Sarawak Energy	emissions in tCO2e (scope 1)	MYS	https://www.sarawakenergy.com/assets/pdf/INTERACTIVE-PDF-Sarawak-Energy-ASR2023.pdf		2030	Reach an intensity of 0.17 by 2030	2023																6.47254e+06	5.71207e+06	6.09005e+06	6.59945e+06	7.21973e+06	7.14809e+06	7.07174e+06	6.99052e+06	6.9043e+06	6.81291e+06	6.71622e+06	6.61405e+06
Sarawak Energy1	output	MYS	https://www.sarawakenergy.com/assets/pdf/ASR21-Interactive.pdf				2023																28551510	27535000	30163000	32589000	34457000	3.506e+07	3.56735e+07	3.62978e+07	3.6933e+07	3.75794e+07	3.8237e+07	3.89062e+07
Sarawak Energy2	intensity	MYS	https://www.sarawakenergy.com/assets/pdf/INTERACTIVE-Sarawak-Energy-ASR20.pdf				2023										TRUE						0.226697	0.207448	0.201905	0.202505	0.209529	0.203882	0.198235	0.192588	0.186941	0.181294	0.175647	0.17
Sarawak Energy3	cumulative emissions	MYS					2023																6.47254e+06	1.21846e+07	1.82747e+07	2.48741e+07	3.20938e+07	3.92419e+07	4.63137e+07	5.33042e+07	6.02085e+07	6.70214e+07	7.37376e+07	8.03517e+07
Sarawak Energy4	SDA intensity	MYS					2023	-0.23157															0.226697	0.233176	0.2667	0.294022	0.315455	0.330401	0.345053	0.368888	0.392113	0.414742	0.436789	0.458267
Sarawak Energy5	SDA cumulative emissions	MYS																					6.47254e+06	1.2893e+07	2.09375e+07	3.05194e+07	4.1389e+07	5.29729e+07	6.52821e+07	7.8672e+07	9.31539e+07	1.0874e+08	1.25441e+08	1.43271e+08
Sarawak Energy6	marketshare	MYS																					0.159952	0.151605	0.163218	0.173312	0.180095	0.180095	0.180095	0.180095	0.180095	0.180095	0.180095	0.180095
Sarawak Energy7	my	MYS																					1	1.05506	0.979994	0.922914	0.888156	0.888156	0.888156	0.888156	0.888156	0.888156	0.888156	0.888156
Sarawak Energy8	consumes total budget Y/N?	MYS																					FALSE	FALSE	FALSE	FALSE	FALSE	FALSE	FALSE	FALSE	FALSE	FALSE	FALSE	FALSE
Sarawak Energy9	Cumulative overshoot	MYS
Sarawak Energy10	CBD Cumulative emissions	MYS																					1.75948e+07	3.42207e+07	5.20659e+07	7.09569e+07	9.05273e+07	1.10038e+08	1.29488e+08	1.48614e+08	1.67416e+08	1.85894e+08	2.04047e+08	2.21877e+08
Malaysian companies	emissions in tCO2e (scope 1)	MYS																					6.01325e+07	6.43621e+07	6.20101e+07	6.19962e+07	6.26164e+07	6.49614e+07	6.30448e+07	6.19039e+07	6.07038e+07	5.94427e+07	5.81189e+07	5.67306e+07
Malaysian companies1	output	MYS																					1.15036e+08	1.18566e+08	1.21957e+08	1.21453e+08	1.26184e+08	1.29155e+08	1.31415e+08	1.33714e+08	1.36054e+08	1.38435e+08	1.40858e+08	1.43323e+08
Malaysian companies2	intensity	MYS															TRUE						0.52273	0.542835	0.508457	0.510453	0.496231	0.502974	0.477826	0.453934	0.431238	0.409676	0.389192	0.369732
Malaysian companies3	cumulative emissions	MYS																					6.01325e+07	1.24495e+08	1.86505e+08	2.48501e+08	3.11117e+08	3.76079e+08	4.39123e+08	5.01027e+08	5.61731e+08	6.21174e+08	6.79293e+08	7.36023e+08
Malaysian companies4	SDA intensity	MYS						0.0644633															0.52273	0.516896	0.511407	0.507696	0.502006	0.497197	0.492736	0.48548	0.478408	0.471518	0.464806	0.458267
Malaysian companies5	SDA cumulative emissions	MYS																					6.01325e+07	1.21419e+08	1.83789e+08	2.4545e+08	3.08795e+08	3.73011e+08	4.37763e+08	5.02679e+08	5.67769e+08	6.33044e+08	6.98515e+08	7.64195e+08
Malaysian companies6	marketshare	MYS																					0.644457	0.652814	0.659934	0.645904	0.659521	0.663436	0.663436	0.663436	0.663436	0.663436	0.663436	0.663436
Malaysian companies7	my	MYS																					1	0.987199	0.976547	0.997759	0.977159	0.971392	0.971392	0.971392	0.971392	0.971392	0.971392	0.971392
Malaysian companies8	consumes total budget Y/N?	MYS																					FALSE	FALSE	FALSE	FALSE	FALSE	FALSE	FALSE	FALSE	FALSE	FALSE	FALSE	FALSE
Malaysian companies9	Cumulative overshoot	MYS
Malaysian companies10	CBD Cumulative emissions	MYS																					7.08902e+07	1.42482e+08	2.14635e+08	2.85038e+08	3.56706e+08	4.28579e+08	5.0023e+08	5.70687e+08	6.39949e+08	7.08018e+08	7.74892e+08	8.40573e+08
Fortis	emissions in tCO2e (scope 1)	CAN	https://www.fortisinc.com/docs/default-source/environment-reports/2025-sustainability-update-report---final.pdf?sfvrsn=3737322e_1	We only assess generation activities, so for the emissions scope 1 emissions from generation was used (instead of total scope 1) and generated output was used (instead of output delivered). The targets covers total scope 1 emissions but it was assumed that scope 1 emissions from generation would decrease at the same rate.	2030	corporate-wide 75% reduction target for scope 1 emissions by 2035 from a 2019 base year, 2050 net-zero goal																	12308000	10418000	9417000	8336000	7854000	7795000	7500125	7205250	6910375	6615500	6320625	6025750	5730875	5436000	5141125	4846250	3077000	2.87187e+06	2.66673e+06	2.4616e+06	2.25647e+06	2.05133e+06	1.8462e+06	1.64107e+06	1.43593e+06	1.2308e+06	1.02567e+06
Fortis1	output	CAN																							17520000	15969000	15693000	16811000	1.7084e+07	1.75389e+07	1.80886e+07	1.86454e+07	1.93025e+07	1.9992e+07	2.08417e+07	2.16153e+07	2.23435e+07	2.31649e+07	2.3896e+07	2.47054e+07	2.5498e+07	2.63071e+07	2.71304e+07	2.79452e+07	2.88625e+07	2.96378e+07	3.03851e+07	3.11034e+07	3.17475e+07
Fortis2	intensity	CAN															TRUE								0.5375	0.522011	0.500478	0.463684	0.439014	0.410816	0.38203	0.354806	0.327452	0.301408	0.274971	0.251488	0.230094	0.209207	0.128767	0.116244	0.104586	0.0935719	0.083171	0.0734057	0.0639653	0.0553708	0.0472579	0.0395712	0.032307
Fortis3	cumulative emissions	CAN																							9417000	17753000	25607000	33402000	40902125	48107375	55017750	61633250	67953875	73979625	79710500	85146500	90287625	95133875	98210875	1.01083e+08	103749475	106211075	1.08468e+08	110518875	112365075	1.14006e+08	115442075	116672875	1.17699e+08
Fortis4	SDA intensity	CAN						0.563564																TRUE	0.5375	0.630735	0.621001	0.51423	0.419645	0.413673	0.409956	0.40417	0.372907	0.322421	0.240959	0.172751	0.161033	0.127248	0.0847368	0.0730353	0.0618084	0.0515792	0.0426985	0.0366523	0.0294621	0.0233155	0.016382	0.00860277	0.0012117
Fortis5	SDA cumulative emissions	CAN																							9417000	1.94892e+07	2.92346e+07	3.78793e+07	4.50485e+07	5.23039e+07	5.97194e+07	6.72553e+07	7.44533e+07	8.08992e+07	8.59212e+07	8.96553e+07	9.32533e+07	9.6201e+07	9.82258e+07	1.0003e+08	1.01606e+08	1.02963e+08	1.04122e+08	1.05146e+08	1.05996e+08	1.06687e+08	1.07185e+08	1.07452e+08	1.07491e+08
Fortis6	marketshare	CAN																							0.0279997	0.0247421	0.0243292	0.0255135	0.0255135	0.0255135	0.0255135	0.0255135	0.0255135	0.0255135	0.0255135	0.0255135	0.0255135	0.0255135	0.0255135	0.0255135	0.0255135	0.0255135	0.0255135	0.0255135	0.0255135	0.0255135	0.0255135	0.0255135	0.0255135
Fortis7	my	CAN																							1	1.13166	1.15087	1.09745	1.09745	1.09745	1.09745	1.09745	1.09745	1.09745	1.09745	1.09745	1.09745	1.09745	1.09745	1.09745	1.09745	1.09745	1.09745	1.09745	1.09745	1.09745	1.09745	1.09745	1.09745
Fortis8	consumes total budget Y/N?	CAN																							FALSE	FALSE	FALSE	FALSE	FALSE	FALSE	FALSE	FALSE	FALSE	FALSE	FALSE	FALSE	FALSE	FALSE	FALSE	FALSE	FALSE	TRUE	TRUE	TRUE	TRUE	TRUE	TRUE	TRUE	TRUE
Fortis9	Cumulative overshoot	CAN
Fortis10	CBD Cumulative emissions	CAN																							1.44702e+06	2.81774e+06	4.10986e+06	5.26741e+06	6.15987e+06	7.05769e+06	7.97184e+06	8.89518e+06	9.74503e+06	1.04479e+07	1.08824e+07	1.1074e+07	1.12261e+07	1.12462e+07	1.10886e+07	1.08748e+07	1.06038e+07	1.0277e+07	9.8976e+06	9.47714e+06	9.00641e+06	8.49104e+06	7.92566e+06	7.30441e+06	6.62907e+06
Ontario Power Generation	emissions in tCO2e (scope 1)	CAN	https://www.opg.com/reporting/financial-reports/	Contracted hydroelectric is assumed to be equivalent to the OPG's US operations.		net-zero carbon emissions company by 2040																			1955852	2773283	3379689	3.18088e+06	2.98208e+06	2.78327e+06	2.58447e+06	2.38566e+06	2.18686e+06	1.98805e+06	1.78925e+06	1.59044e+06	1.39164e+06	1.19283e+06	994026	795221	596416	397610	198805	0	0	0	0	0	0
Ontario Power Generation1	output	CAN	https://interactive.opg.com/integrated-esg-and-annual-report/																						7.34342e+07	7.57457e+07	75700000	77100000	7.83522e+07	8.04382e+07	8.29593e+07	8.55131e+07	8.85265e+07	9.1689e+07	9.5586e+07	9.9134e+07	1.02474e+08	1.06241e+08	1.09594e+08	1.13306e+08	1.16941e+08	1.20652e+08	1.24428e+08	1.28164e+08	1.32372e+08	1.35927e+08	1.39354e+08	1.42649e+08	1.45603e+08
Ontario Power Generation2	intensity	CAN															TRUE								0.0266341	0.0366131	0.0446458	0.0412566	0.0380599	0.0346014	0.0311534	0.0278982	0.0247029	0.0216826	0.0187187	0.0160433	0.0135804	0.0112276	0.00907011	0.00701835	0.00510015	0.00329553	0.00159775	0	0	0	0	0	0
Ontario Power Generation3	cumulative emissions	CAN																							1955852	4729135	8108824	1.12897e+07	1.42718e+07	1.70551e+07	1.96395e+07	2.20252e+07	2.4212e+07	2.62001e+07	2.79893e+07	2.95798e+07	3.09714e+07	3.21643e+07	3.31583e+07	3.39535e+07	3.45499e+07	3.49475e+07	3.51463e+07	3.51463e+07	3.51463e+07	3.51463e+07	3.51463e+07	3.51463e+07	3.51463e+07
Ontario Power Generation4	SDA intensity	CAN						0.0526983																TRUE	0.0266341	0.028207	0.0265103	0.0201087	0.0120256	0.0115152	0.0111975	0.010703	0.0080313	0.00371689	-0.00324475	-0.00907372	-0.0100752	-0.0129624	-0.0165953	-0.0175953	-0.0185548	-0.019429	-0.0201879	-0.0207046	-0.021319	-0.0218443	-0.0224369	-0.0231017	-0.0237333
Ontario Power Generation5	SDA cumulative emissions	CAN																							1.95585e+06	4.09241e+06	6.09925e+06	7.64962e+06	8.59185e+06	9.51811e+06	1.04471e+07	1.13623e+07	1.20733e+07	1.24141e+07	1.21039e+07	1.12044e+07	1.0172e+07	8.79483e+06	6.97609e+06	4.98243e+06	2.81262e+06	468487	-2.04345e+06	-4.69704e+06	-7.51908e+06	-1.04883e+07	-1.3615e+07	-1.69104e+07	-2.03661e+07
Ontario Power Generation6	marketshare	CAN																							0.117359	0.117359	0.117359	0.117012	0.117012	0.117012	0.117012	0.117012	0.117012	0.117012	0.117012	0.117012	0.117012	0.117012	0.117012	0.117012	0.117012	0.117012	0.117012	0.117012	0.117012	0.117012	0.117012	0.117012	0.117012
Ontario Power Generation7	my	CAN																							1	1	1	1.00297	1.00297	1.00297	1.00297	1.00297	1.00297	1.00297	1.00297	1.00297	1.00297	1.00297	1.00297	1.00297	1.00297	1.00297	1.00297	1.00297	1.00297	1.00297	1.00297	1.00297	1.00297
Ontario Power Generation8	consumes total budget Y/N?	CAN																							TRUE	TRUE	TRUE	TRUE	TRUE	TRUE	TRUE	TRUE	TRUE	TRUE	TRUE	TRUE	TRUE	TRUE	TRUE	TRUE	TRUE	TRUE	TRUE	TRUE	TRUE	TRUE	TRUE	TRUE	TRUE
Ontario Power Generation9	Cumulative overshoot	CAN
Ontario Power Generation10	CBD Cumulative emissions	CAN																							6.06513e+06	1.25668e+07	1.87998e+07	2.41086e+07	2.82017e+07	3.23194e+07	3.65119e+07	4.07466e+07	4.46443e+07	4.7868e+07	4.98607e+07	5.07394e+07	5.14368e+07	5.15293e+07	5.08061e+07	4.98256e+07	4.85829e+07	4.7084e+07	4.5344e+07	4.34156e+07	4.12568e+07	3.88931e+07	3.63001e+07	3.34509e+07	3.03536e+07
Hydro-Québec	emissions in tCO2e (scope 1)	CAN	https://www.hydroquebec.com/data/documents-donnees/pdf/M1029-22024G415-rapport-annuel-2025-03-fr.pdf	Electricity sales in Canada were assumed to be equivalent to electricity generation in Canada																				TRUE	105120	234780	106380	439456	446593	458483	472853	487409	504585	522611	544823	565046	584082	605553	624664	645824	666541	687692	709216	730514	754495	774760	794295	813073	829910
Hydro-Québec1	output	CAN	https://www.hydroquebec.com/data/developpement-durable/pdf/etiquette-electricite-reseau-principal-hq-2024.pdf																						175200000	180600000	177300000	177200000	1.80078e+08	1.84872e+08	1.90667e+08	1.96536e+08	2.03462e+08	2.1073e+08	2.19687e+08	2.27841e+08	2.35517e+08	2.44175e+08	2.51881e+08	2.60413e+08	2.68767e+08	2.77295e+08	2.85974e+08	2.94562e+08	3.04232e+08	3.12403e+08	3.2028e+08	3.27852e+08	3.34641e+08
Hydro-Québec2	intensity	CAN															TRUE								0.0006	0.0013	0.0006	0.00248	0.00248	0.00248	0.00248	0.00248	0.00248	0.00248	0.00248	0.00248	0.00248	0.00248	0.00248	0.00248	0.00248	0.00248	0.00248	0.00248	0.00248	0.00248	0.00248	0.00248	0.00248
Hydro-Québec3	cumulative emissions	CAN																							105120	339900	446280	885736	1.33233e+06	1.79081e+06	2.26367e+06	2.75107e+06	3.25566e+06	3.77827e+06	4.32309e+06	4.88814e+06	5.47222e+06	6.07777e+06	6.70244e+06	7.34826e+06	8.0148e+06	8.70249e+06	9.41171e+06	1.01422e+07	1.08967e+07	1.16715e+07	1.24658e+07	1.32788e+07	1.41088e+07
Hydro-Québec4	SDA intensity	CAN						0.0266643																TRUE	0.0006	0.00141335	0.00103338	-0.00181232	-0.00605791	-0.00632599	-0.00649282	-0.00675256	-0.00815585	-0.010422	-0.0140785	-0.0171401	-0.0176661	-0.0191826	-0.0210908	-0.021616	-0.02212	-0.0225791	-0.0229777	-0.0232491	-0.0235719	-0.0238478	-0.024159	-0.0245082	-0.0248399
Hydro-Québec5	SDA cumulative emissions	CAN																							105120	360371	543589	222445	-868450	-2.03795e+06	-3.27591e+06	-4.60303e+06	-6.26244e+06	-8.45866e+06	-1.15515e+07	-1.54567e+07	-1.96174e+07	-2.43013e+07	-2.96137e+07	-3.52428e+07	-4.11879e+07	-4.7449e+07	-5.402e+07	-6.08683e+07	-6.80396e+07	-7.54898e+07	-8.32274e+07	-9.12625e+07	-9.9575e+07
Hydro-Québec6	marketshare	CAN																							0.279997	0.279819	0.274872	0.268931	0.268931	0.268931	0.268931	0.268931	0.268931	0.268931	0.268931	0.268931	0.268931	0.268931	0.268931	0.268931	0.268931	0.268931	0.268931	0.268931	0.268931	0.268931	0.268931	0.268931	0.268931
Hydro-Québec7	my	CAN																							1	1.00064	1.01865	1.04115	1.04115	1.04115	1.04115	1.04115	1.04115	1.04115	1.04115	1.04115	1.04115	1.04115	1.04115	1.04115	1.04115	1.04115	1.04115	1.04115	1.04115	1.04115	1.04115	1.04115	1.04115
Hydro-Québec8	consumes total budget Y/N?	CAN																							TRUE	TRUE	TRUE	TRUE	TRUE	TRUE	TRUE	TRUE	TRUE	TRUE	TRUE	TRUE	TRUE	TRUE	TRUE	TRUE	TRUE	TRUE	TRUE	TRUE	TRUE	TRUE	TRUE	TRUE	TRUE
Hydro-Québec9	Cumulative overshoot	CAN
Hydro-Québec10	CBD Cumulative emissions	CAN																							1.44702e+07	2.99722e+07	4.45707e+07	5.6772e+07	6.61792e+07	7.56429e+07	8.52787e+07	9.50113e+07	1.03969e+08	1.11378e+08	1.15958e+08	1.17978e+08	1.19581e+08	1.19793e+08	1.18131e+08	1.15878e+08	1.13022e+08	1.09577e+08	1.05578e+08	1.01146e+08	9.61838e+07	9.07514e+07	8.47919e+07	7.82435e+07	7.11249e+07
Nova Scotia Power	emissions in tCO2e (scope 1)	CAN	https://www.nspower.ca/cleanandgreen/air-emissions-reporting																					TRUE	6096390	5770500	4931152	5314847	5.40117e+06	5.54496e+06	5.71876e+06	5.8948e+06	6.10253e+06	6.32053e+06	6.58917e+06	6.83375e+06	7.06398e+06	7.32365e+06	7.55478e+06	7.81069e+06	8.06125e+06	8.31705e+06	8.57737e+06	8.83494e+06	9.12497e+06	9.37007e+06	9.60633e+06	9.83343e+06	1.00371e+07
Nova Scotia Power1	output	CAN																							1.01118e+07	1.03562e+07	1.09435e+07	1.0581e+07	1.07529e+07	1.10391e+07	1.13851e+07	1.17356e+07	1.21492e+07	1.25832e+07	1.3118e+07	1.36049e+07	1.40633e+07	1.45802e+07	1.50404e+07	1.55498e+07	1.60487e+07	1.65579e+07	1.70762e+07	1.7589e+07	1.81664e+07	1.86543e+07	1.91247e+07	1.95768e+07	1.99822e+07
Nova Scotia Power2	intensity	CAN															TRUE								0.6029	0.5572	0.4506	0.5023	0.5023	0.5023	0.5023	0.5023	0.5023	0.5023	0.5023	0.5023	0.5023	0.5023	0.5023	0.5023	0.5023	0.5023	0.5023	0.5023	0.5023	0.5023	0.5023	0.5023	0.5023
Nova Scotia Power3	cumulative emissions	CAN																							6096390	11866890	16798042	22112889	2.75141e+07	3.3059e+07	3.87778e+07	4.46726e+07	5.07751e+07	5.70956e+07	6.36848e+07	7.05185e+07	7.75825e+07	8.49062e+07	9.2461e+07	1.00272e+08	1.08333e+08	1.1665e+08	1.25227e+08	1.34062e+08	1.43187e+08	1.52557e+08	1.62164e+08	1.71997e+08	1.82034e+08
Nova Scotia Power4	SDA intensity	CAN						0.628964																TRUE	0.6029	0.626291	0.571621	0.526869	0.430071	0.423959	0.420155	0.414233	0.382239	0.330573	0.247205	0.177402	0.165409	0.130834	0.0873286	0.0753533	0.0638639	0.0533954	0.044307	0.0381193	0.030761	0.0244705	0.0173749	0.00941369	0.00184973
Nova Scotia Power5	SDA cumulative emissions	CAN																							6096390	1.25824e+07	1.8838e+07	2.44128e+07	2.90373e+07	3.37174e+07	3.85009e+07	4.33622e+07	4.80061e+07	5.21658e+07	5.54086e+07	5.78222e+07	6.01483e+07	6.20559e+07	6.33694e+07	6.45411e+07	6.5566e+07	6.64502e+07	6.72068e+07	6.78772e+07	6.84361e+07	6.88925e+07	6.92248e+07	6.94091e+07	6.94461e+07
Nova Scotia Power6	marketshare	CAN																							0.0161602	0.0160458	0.016966	0.0160585	0.0160585	0.0160585	0.0160585	0.0160585	0.0160585	0.0160585	0.0160585	0.0160585	0.0160585	0.0160585	0.0160585	0.0160585	0.0160585	0.0160585	0.0160585	0.0160585	0.0160585	0.0160585	0.0160585	0.0160585	0.0160585
Nova Scotia Power7	my	CAN																							1	1.00713	0.952506	1.00633	1.00633	1.00633	1.00633	1.00633	1.00633	1.00633	1.00633	1.00633	1.00633	1.00633	1.00633	1.00633	1.00633	1.00633	1.00633	1.00633	1.00633	1.00633	1.00633	1.00633	1.00633
Nova Scotia Power8	consumes total budget Y/N?	CAN																							FALSE	FALSE	FALSE	FALSE	FALSE	FALSE	FALSE	FALSE	FALSE	FALSE	FALSE	TRUE	TRUE	TRUE	TRUE	TRUE	TRUE	TRUE	TRUE	TRUE	TRUE	TRUE	TRUE	TRUE	TRUE
Nova Scotia Power9	Cumulative overshoot	CAN
Nova Scotia Power10	CBD Cumulative emissions	CAN																							835159	1.7241e+06	2.62516e+06	3.35373e+06	3.91546e+06	4.48056e+06	5.05593e+06	5.63709e+06	6.172e+06	6.61441e+06	6.88788e+06	7.00848e+06	7.10419e+06	7.11688e+06	7.01763e+06	6.88306e+06	6.71252e+06	6.50681e+06	6.26802e+06	6.00338e+06	5.7071e+06	5.38272e+06	5.02687e+06	4.63584e+06	4.21077e+06
SaskPower	emissions in tCO2e (scope 1)	CAN	https://www.saskpower.com/about-us/our-company/current-reports	Output is estimated to be equivalent to electricity supplied minus imports.			2024																	TRUE	14900000	13800000	13600000	12800000	1.2642e+07	1.29786e+07	1.33854e+07	1.37974e+07	1.42836e+07	1.47939e+07	1.54227e+07	1.59951e+07	1.6534e+07	1.71418e+07	1.76828e+07	1.82818e+07	1.88682e+07	1.9467e+07	2.00763e+07	2.06791e+07	2.1358e+07	2.19317e+07	2.24846e+07	2.30162e+07	2.34928e+07
SaskPower1	output	CAN					2025																		24005000	23985000	24620000	24548000	24245000	2.48905e+07	2.56706e+07	2.64608e+07	2.73933e+07	2.83719e+07	2.95778e+07	3.06757e+07	3.17091e+07	3.28747e+07	3.39122e+07	3.5061e+07	3.61857e+07	3.7334e+07	3.85025e+07	3.96587e+07	4.09606e+07	4.20608e+07	4.31213e+07	4.41407e+07	4.50548e+07
SaskPower2	intensity	CAN					2024										TRUE								0.620704	0.57536	0.552396	0.521427	0.521427	0.521427	0.521427	0.521427	0.521427	0.521427	0.521427	0.521427	0.521427	0.521427	0.521427	0.521427	0.521427	0.521427	0.521427	0.521427	0.521427	0.521427	0.521427	0.521427	0.521427
SaskPower3	cumulative emissions	CAN																							14900000	28700000	42300000	55100000	6.7742e+07	8.07206e+07	9.4106e+07	1.07903e+08	1.22187e+08	1.36981e+08	1.52404e+08	1.68399e+08	1.84933e+08	2.02074e+08	2.19757e+08	2.38039e+08	2.56907e+08	2.76374e+08	2.9645e+08	3.1713e+08	3.38487e+08	3.60419e+08	3.82904e+08	4.0592e+08	4.29413e+08
SaskPower4	SDA intensity	CAN						0.646768																TRUE	0.620704	0.661548	0.622479	0.555745	0.467783	0.461166	0.457048	0.450636	0.415997	0.360059	0.269799	0.194224	0.18124	0.143806	0.0967037	0.0837383	0.0712989	0.0599649	0.0501251	0.0434259	0.0354591	0.0286486	0.0209663	0.0123469	0.00415759
SaskPower5	SDA cumulative emissions	CAN																							1.49e+07	3.07672e+07	4.60927e+07	5.97351e+07	7.10765e+07	8.25552e+07	9.42879e+07	1.06212e+08	1.17608e+08	1.27823e+08	1.35803e+08	1.41761e+08	1.47508e+08	1.52236e+08	1.55515e+08	1.58451e+08	1.61031e+08	1.6327e+08	1.652e+08	1.66922e+08	1.68374e+08	1.69579e+08	1.70483e+08	1.71028e+08	1.71216e+08
SaskPower6	marketshare	CAN																							0.0383637	0.037162	0.0381689	0.0372557	0.0362078	0.0362078	0.0362078	0.0362078	0.0362078	0.0362078	0.0362078	0.0362078	0.0362078	0.0362078	0.0362078	0.0362078	0.0362078	0.0362078	0.0362078	0.0362078	0.0362078	0.0362078	0.0362078	0.0362078	0.0362078
SaskPower7	my	CAN																							1	1.03234	1.0051	1.02974	1.05954	1.05954	1.05954	1.05954	1.05954	1.05954	1.05954	1.05954	1.05954	1.05954	1.05954	1.05954	1.05954	1.05954	1.05954	1.05954	1.05954	1.05954	1.05954	1.05954	1.05954
SaskPower8	consumes total budget Y/N?	CAN																							FALSE	FALSE	FALSE	FALSE	FALSE	FALSE	FALSE	FALSE	FALSE	FALSE	FALSE	TRUE	TRUE	TRUE	TRUE	TRUE	TRUE	TRUE	TRUE	TRUE	TRUE	TRUE	TRUE	TRUE	TRUE
SaskPower9	Cumulative overshoot	CAN
SaskPower10	CBD Cumulative emissions	CAN																							1.98264e+06	4.04141e+06	6.06856e+06	7.75885e+06	9.0254e+06	1.02996e+07	1.15969e+07	1.29072e+07	1.41133e+07	1.51108e+07	1.57275e+07	1.59994e+07	1.62152e+07	1.62438e+07	1.602e+07	1.57166e+07	1.53321e+07	1.48683e+07	1.43298e+07	1.37331e+07	1.30651e+07	1.23337e+07	1.15313e+07	1.06497e+07	9.69126e+06
Transalta	emissions in tCO2e (scope 1)	CAN	2024 and 2022 annual reports; https://transalta.com/investors/results-reporting/	Company wide scope 1&2 emissions reduction targets were applied to scope 1 emissions in Canada. The baseline of the 2026 target is based on the group wide emissions in 2015, but emissions from activities in Canada in 2015 are not available. The same rate of group-wide decarbonisation between 2024 and 2026 was applied to Canadian activities to estimate the impact of the group wide target on activi…	2026; 2030; 2045	75% scope 1 and 2 emissions reductions compared with a 2015 baseline by 2026, 30% scope 1 and 2 emissions reductions by 2030 compared with a 2023 baseline, net zero by 2045	2024																	9400000	7900000	5200000	5300000	5400000	4978125	4556250	4.34469e+06	4133125	3.92156e+06	3.71e+06	3.46267e+06	3.21533e+06	2.968e+06	2.72067e+06	2.47333e+06	2.226e+06	1.97867e+06	1.73133e+06	1.484e+06	1.23667e+06	989333	742000	494667	247333	0
Transalta1	output	CAN																							1.31667e+07	13000000	1.29268e+07	1.54286e+07	1.56791e+07	1.60966e+07	1.66011e+07	1.71121e+07	1.77151e+07	1.8348e+07	1.91278e+07	1.98378e+07	2.05062e+07	2.126e+07	2.19309e+07	2.26738e+07	2.34012e+07	2.41437e+07	2.48994e+07	2.56471e+07	2.64891e+07	2.72006e+07	2.78864e+07	2.85457e+07	2.91368e+07
Transalta2	intensity	CAN		Since output in Canada is not available, group wide intensity is assumed to be equivalent to the intensity for the production in Canada and used to estimate the output in Canada given that emissions in Canada are available. The output obtained using these approach are within the same order of magnitude but larger than the output reported by the company in Alberta, which accounts for 77% of the co…			2024										TRUE								0.6	0.4	0.41	0.35	0.3175	0.283057	0.261711	0.241532	0.221368	0.202202	0.181028	0.162081	0.144737	0.127971	0.112778	0.098175	0.0845542	0.0717094	0.0595998	0.0482185	0.0373488	0.0272789	0.0177386	0.00866448	0
Transalta3	cumulative emissions	CAN																							7900000	13100000	18400000	23800000	28778125	33334375	3.76791e+07	4.18122e+07	45733750	49443750	5.29064e+07	56121750	59089750	6.18104e+07	64283750	66509750	6.84884e+07	70219750	71703750	7.29404e+07	73929750	74671750	7.51664e+07	75413750	75413750
Transalta4	SDA intensity	CAN						0.626064																TRUE	0.6	0.647508	0.629748	0.465427	0.379386	0.373953	0.370572	0.365308	0.336868	0.290943	0.21684	0.154793	0.144133	0.113399	0.0747284	0.0640838	0.0538711	0.0445658	0.0364874	0.0309873	0.0244466	0.0188551	0.0125479	0.00547139	-0.00125207
Transalta5	SDA cumulative emissions	CAN																							7900000	1.63176e+07	2.44582e+07	3.16391e+07	3.75876e+07	4.36069e+07	4.97588e+07	5.601e+07	6.19777e+07	6.73159e+07	7.14636e+07	7.45343e+07	7.74899e+07	7.99008e+07	8.15397e+07	8.29927e+07	8.42533e+07	8.53293e+07	8.62378e+07	8.70326e+07	8.76801e+07	8.8193e+07	8.85429e+07	8.86991e+07	8.86626e+07
Transalta6	marketshare	CAN																							0.0210424	0.020142	0.0200407	0.0234154	0.0234154	0.0234154	0.0234154	0.0234154	0.0234154	0.0234154	0.0234154	0.0234154	0.0234154	0.0234154	0.0234154	0.0234154	0.0234154	0.0234154	0.0234154	0.0234154	0.0234154	0.0234154	0.0234154	0.0234154	0.0234154
Transalta7	my	CAN																							1	1.0447	1.04998	0.898654	0.898654	0.898654	0.898654	0.898654	0.898654	0.898654	0.898654	0.898654	0.898654	0.898654	0.898654	0.898654	0.898654	0.898654	0.898654	0.898654	0.898654	0.898654	0.898654	0.898654	0.898654
Transalta8	consumes total budget Y/N?	CAN																							FALSE	FALSE	FALSE	FALSE	FALSE	FALSE	FALSE	FALSE	FALSE	FALSE	FALSE	FALSE	FALSE	FALSE	FALSE	FALSE	FALSE	FALSE	FALSE	FALSE	FALSE	FALSE	FALSE	FALSE	FALSE
Transalta9	Cumulative overshoot	CAN
Transalta10	CBD Cumulative emissions	CAN																							1.08747e+06	2.20334e+06	3.2677e+06	4.33006e+06	5.14913e+06	5.97312e+06	6.8121e+06	7.6595e+06	8.43947e+06	9.08457e+06	9.48333e+06	9.65918e+06	9.79874e+06	9.81724e+06	9.67253e+06	9.47631e+06	9.22763e+06	8.92768e+06	8.5795e+06	8.19361e+06	7.76159e+06	7.2886e+06	6.76972e+06	6.19955e+06	5.57974e+06
Canadian companies	emissions in tCO2e (scope 1)	CAN																						TRUE	40374362	36114563	35171221	3.49302e+07	3.39501e+07	3.35268e+07	3.34165e+07	3.33139e+07	3.33198e+07	3.33608e+07	3.35394e+07	3.36357e+07	3.36828e+07	3.38307e+07	3.24066e+07	3.26313e+07	3.28378e+07	3.30622e+07	3.33021e+07	3.35326e+07	3.4073e+07	3.44595e+07	3.48159e+07	3.51408e+07	3.53855e+07
Canadian companies1	output	CAN																							3.13438e+08	3.19656e+08	3.17183e+08	3.21669e+08	3.26191e+08	3.34876e+08	3.45371e+08	3.56003e+08	3.68548e+08	3.81714e+08	3.97938e+08	4.12709e+08	4.26613e+08	4.42295e+08	4.56254e+08	4.71709e+08	4.86841e+08	5.0229e+08	5.18011e+08	5.33566e+08	5.51082e+08	5.65884e+08	5.80152e+08	5.93868e+08	6.06165e+08
Canadian companies2	intensity	CAN															TRUE								0.128811	0.112979	0.110886	0.108591	0.10408	0.100117	0.0967553	0.0935776	0.0904082	0.0873974	0.0842831	0.0814998	0.0789541	0.076489	0.0710275	0.0691769	0.0674508	0.0658231	0.0642885	0.0628461	0.0618292	0.0608951	0.0600116	0.0591728	0.0583759
Canadian companies3	cumulative emissions	CAN																							40374362	76488925	111660146	1.4659e+08	1.8054e+08	2.14067e+08	2.47484e+08	2.80798e+08	3.14117e+08	3.47478e+08	3.81018e+08	4.14653e+08	4.48336e+08	4.82167e+08	5.14573e+08	5.47205e+08	5.80043e+08	6.13105e+08	6.46407e+08	6.7994e+08	7.14013e+08	7.48472e+08	7.83288e+08	8.18429e+08	8.53814e+08
Canadian companies4	SDA intensity	CAN						0.154876																TRUE	0.128811	0.135254	0.131334	0.112762	0.0887054	0.0871675	0.0862105	0.0847204	0.0766702	0.0636703	0.042694	0.0251305	0.0221129	0.0134133	0.00246688	-0.000546266	-0.00343717	-0.00607118	-0.00835793	-0.00991483	-0.0117663	-0.013349	-0.0151344	-0.0171375	-0.0190407
Canadian companies5	SDA cumulative emissions	CAN																							40374362	8.36093e+07	1.25266e+08	1.61538e+08	1.90473e+08	2.19664e+08	2.49438e+08	2.79599e+08	3.07856e+08	3.32159e+08	3.49149e+08	3.59521e+08	3.68954e+08	3.74887e+08	3.76012e+08	3.75755e+08	3.74081e+08	3.71032e+08	3.66702e+08	3.61412e+08	3.54928e+08	3.47374e+08	3.38594e+08	3.28416e+08	3.16874e+08
Canadian companies6	marketshare	CAN																							0.500922	0.49527	0.491736	0.488186	0.487138	0.487138	0.487138	0.487138	0.487138	0.487138	0.487138	0.487138	0.487138	0.487138	0.487138	0.487138	0.487138	0.487138	0.487138	0.487138	0.487138	0.487138	0.487138	0.487138	0.487138
Canadian companies7	my	CAN																							1	1.01141	1.01868	1.02609	1.0283	1.0283	1.0283	1.0283	1.0283	1.0283	1.0283	1.0283	1.0283	1.0283	1.0283	1.0283	1.0283	1.0283	1.0283	1.0283	1.0283	1.0283	1.0283	1.0283	1.0283
Canadian companies8	consumes total budget Y/N?	CAN																							FALSE	FALSE	FALSE	FALSE	FALSE	FALSE	TRUE	TRUE	TRUE	TRUE	TRUE	TRUE	TRUE	TRUE	TRUE	TRUE	TRUE	TRUE	TRUE	TRUE	TRUE	TRUE	TRUE	TRUE	TRUE
Canadian companies9	Cumulative overshoot	CAN
Canadian companies10	CBD Cumulative emissions	CAN																							2.58877e+07	5.33256e+07	7.94417e+07	1.01591e+08	1.18631e+08	1.35773e+08	1.53227e+08	1.70857e+08	1.87083e+08	2.00504e+08	2.088e+08	2.12459e+08	2.15362e+08	2.15747e+08	2.12736e+08	2.08654e+08	2.03481e+08	1.9724e+08	1.89997e+08	1.81969e+08	1.72981e+08	1.63141e+08	1.52346e+08	1.40484e+08	1.27589e+08
PGE	emissions in tCO2e (scope 1)	POL	https://raportzintegrowany2023.gkpge.pl/app/uploads/2024/12/PGE_integrated_report_short_version_2023.pdf				2024																	48247900	57918000	5.75331e+07	45983700	43243200	4.20814e+07	4.09689e+07	3.98088e+07	3.86012e+07	3.73459e+07	3.60432e+07	3.46336e+07	3.31827e+07	3.16904e+07	3.01569e+07	2.8582e+07	2.70041e+07	2.53795e+07	2.3708e+07	2.19898e+07	2.02247e+07
PGE1	output	POL	https://raportzintegrowany2023.gkpge.pl/app/uploads/2024/12/PGE_integrated_report_short_version_2023.pdf				2024																	58130000	68950000	6.613e+07	56770000	56160000	5.68373e+07	5.76402e+07	5.84432e+07	5.92462e+07	6.00491e+07	6.08521e+07	6.15497e+07	6.22474e+07	6.29451e+07	6.36428e+07	6.43404e+07	6.51306e+07	6.59208e+07	6.67109e+07	6.75011e+07	6.82913e+07
PGE2	intensity	POL	https://raportzintegrowany2022.gkpge.pl/en/wp-content/uploads/sites/2/2023/12/PGEskrotraportuEN.pdf	Output in 2022 and 2021													TRUE							0.83	0.84	0.87	0.81	0.77	0.740385	0.710769	0.681154	0.651538	0.621923	0.592308	0.562692	0.533077	0.503462	0.473846	0.444231	0.414615	0.385	0.355385	0.325769	0.296154
PGE3	cumulative emissions	POL	https://raportzintegrowany2020.gkpge.pl/en/	Output in 2020																				48247900	106165900	163699000	209682700	252925900	2.95007e+08	3.35976e+08	3.75785e+08	4.14386e+08	4.51732e+08	4.87775e+08	5.22409e+08	5.55592e+08	5.87282e+08	6.17439e+08	6.46021e+08	6.73025e+08	6.98404e+08	7.22113e+08	7.44102e+08	7.64327e+08
PGE4	SDA intensity	POL	https://raportzintegrowany2023.gkpge.pl/en/environment-e/climate-change/decarbonization-of-operations/	Intensities in all years				0.562																0.83	0.736563	0.750783	0.823328	0.821884	0.807556	0.786063	0.76457	0.743078	0.721585	0.700092	0.643226	0.58636	0.529494	0.472628	0.415762	0.38621	0.356657	0.327105	0.297552	0.268
PGE5	SDA cumulative emissions	POL	https://www.gkpge.pl/en/for-investors/shares/financial-data/periodic-reports-for-2024	Output in 2024 and 2023, intensity in 2024 (0.04 reduction compared with 2023)																				48247900	9.90339e+07	1.48683e+08	1.95424e+08	2.41581e+08	2.8748e+08	3.32789e+08	3.77473e+08	4.21497e+08	4.64828e+08	5.0743e+08	5.4702e+08	5.8352e+08	6.16849e+08	6.46928e+08	6.73678e+08	6.98832e+08	7.22343e+08	7.44165e+08	7.6425e+08	7.82552e+08
PGE6	marketshare	POL																						0.328976	0.385327	0.365	0.309514	0.302495	0.302495	0.302495	0.302495	0.302495	0.302495	0.302495	0.302495	0.302495	0.302495	0.302495	0.302495	0.302495	0.302495	0.302495	0.302495	0.302495
PGE7	my	POL																						1	0.853757	0.901303	1.06288	1.08754	1.08754	1.08754	1.08754	1.08754	1.08754	1.08754	1.08754	1.08754	1.08754	1.08754	1.08754	1.08754	1.08754	1.08754	1.08754	1.08754
PGE8	consumes total budget Y/N?	POL																						FALSE	FALSE	FALSE	FALSE	FALSE	FALSE	FALSE	FALSE	FALSE	FALSE	FALSE	FALSE	FALSE	FALSE	FALSE	FALSE	FALSE	FALSE	FALSE	FALSE	FALSE
PGE9	Cumulative overshoot	POL
PGE10	CBD Cumulative emissions	POL																						3.14483e+07	6.8309e+07	1.03239e+08	1.32861e+08	1.61806e+08	1.90736e+08	2.19522e+08	2.48148e+08	2.76598e+08	3.04857e+08	3.32909e+08	3.59721e+08	3.85254e+08	4.09476e+08	4.32349e+08	4.53839e+08	4.74732e+08	4.9501e+08	5.14649e+08	5.33631e+08	5.51933e+08
Enea	emissions in tCO2e (scope 1)	POL	https://ir.enea.pl/en/pr/844527/eneatransition-dynamic-development-of-the-group-enea-presents-the-assumptions-of-its-development-strategy-until-2035#:~:text=Enea%20is%20focusing%20on%20improving,climate%2Dneutral%20company%20by%202050.		2030;2035;2050	reduction in the unit CO₂ emission rate to 448 kg CO₂/MWh in 2030 and 278 kg CO₂/MWh in 2035; climate neutral by 2050	2024																	17032500	20460000	20776600	16358400	15830400	1.48927e+07	1.39585e+07	1.29924e+07	1.19944e+07	1.09645e+07	9.90277e+06	9.25613e+06	8.59227e+06	7.91118e+06	7.21285e+06	6.49728e+06	6.1386e+06	5.76929e+06	5.38933e+06	4.99874e+06	4.5975e+06
Enea1	output	POL	Management Board Report 2024, https://ir.enea.pl/en/pr/850131/consolidated-annual-report-2024	Output and intensity in 2024			2024																	22500000	26400000	26200000	21300000	20400000	2.0646e+07	2.09377e+07	2.12294e+07	2.1521e+07	2.18127e+07	2.21044e+07	2.23578e+07	2.26112e+07	2.28647e+07	2.31181e+07	2.33715e+07	2.36585e+07	2.39456e+07	2.42326e+07	2.45196e+07	2.48067e+07
Enea2	intensity	POL	Management Board Report 2023, https://ir.enea.pl/en/pr/797791/skonsolidowany-raport-roczny-srr-2022	Intensities in 2022, 2023. Output in 2023													TRUE							0.757	0.775	0.793	0.768	0.776	0.721333	0.666667	0.612	0.557333	0.502667	0.448	0.414	0.38	0.346	0.312	0.278	0.259467	0.240933	0.2224	0.203867	0.185333
Enea3	cumulative emissions	POL	Management Board Report 2022, https://ir.enea.pl/en/pr/797791/skonsolidowany-raport-roczny-srr-2022																					17032500	37492500	58269100	74627500	90457900	1.05351e+08	1.19309e+08	1.32301e+08	1.44296e+08	1.5526e+08	1.65163e+08	1.74419e+08	1.83011e+08	1.90923e+08	1.98136e+08	2.04633e+08	2.10771e+08	2.16541e+08	2.2193e+08	2.26929e+08	2.31526e+08
Enea4	SDA intensity	POL	Management Board Report 2021, https://ir.enea.pl/en/pr/733533/skonsolidowany-raport-roczny-srr-2021	Intensity and output in 2021				0.489																0.757	0.680148	0.678396	0.766475	0.781536	0.768251	0.748324	0.728397	0.70847	0.688543	0.668616	0.615892	0.563169	0.510445	0.457722	0.404998	0.377599	0.350199	0.322799	0.2954	0.268
Enea5	SDA cumulative emissions	POL	Management Board Report 2020, https://ir.enea.pl/en/pr/656146/skonsolidowany-raport-roczny-srr-2020	Intensity and output in 2021																				17032500	3.49884e+07	5.27624e+07	6.90883e+07	8.50316e+07	1.00893e+08	1.16561e+08	1.32025e+08	1.47272e+08	1.62291e+08	1.7707e+08	1.9084e+08	2.03574e+08	2.15245e+08	2.25827e+08	2.35292e+08	2.44226e+08	2.52611e+08	2.60434e+08	2.67677e+08	2.74325e+08
Enea6	marketshare	POL																						0.127335	0.147536	0.144609	0.116129	0.109881	0.109881	0.109881	0.109881	0.109881	0.109881	0.109881	0.109881	0.109881	0.109881	0.109881	0.109881	0.109881	0.109881	0.109881	0.109881	0.109881
Enea7	my	POL																						1	0.863072	0.880542	1.09649	1.15884	1.15884	1.15884	1.15884	1.15884	1.15884	1.15884	1.15884	1.15884	1.15884	1.15884	1.15884	1.15884	1.15884	1.15884	1.15884	1.15884
Enea8	consumes total budget Y/N?	POL																						FALSE	FALSE	FALSE	FALSE	FALSE	FALSE	FALSE	FALSE	FALSE	FALSE	FALSE	FALSE	FALSE	FALSE	FALSE	FALSE	FALSE	FALSE	FALSE	FALSE	FALSE	FALSE	FALSE	FALSE	FALSE	FALSE
Enea9	Cumulative overshoot	POL
Enea10	CBD Cumulative emissions	POL																						12172500	26285940	40124780	51239120	61753280	7.22621e+07	8.27184e+07	9.31165e+07	1.03451e+08	1.13716e+08	1.23906e+08	1.33645e+08	1.4292e+08	1.51719e+08	1.60027e+08	1.67833e+08	1.75423e+08	1.82789e+08	1.89923e+08	1.96818e+08	2.03466e+08
Tauron	emissions in tCO2e (scope 1)	POL	Tauron Group Consolidated Annual Report 2024; https://en.tauron.pl/investor-relations/financial-reports	intensity in 2023 and 2024, intensity targets			2024																	8848777	11691000	12015822	9120960	8.10304e+06	7.2708e+06	6.43041e+06	5.56375e+06	4.67082e+06	3.75161e+06	2.80612e+06	2.34632e+06	1.87537e+06	1.39327e+06	900008	395597	320365	243188	164069	83006.2	0
Tauron1	output	POL	Tauron Spreadsheet 2024; https://en.tauron.pl/investor-relations/financial-reports	Output from 2020 to 2024			2024																	12500000	15588000	15666000	12668000	11510000	1.16488e+07	1.18134e+07	1.19779e+07	1.21425e+07	1.23071e+07	1.24716e+07	1.26146e+07	1.27576e+07	1.29006e+07	1.30436e+07	1.31866e+07	1.33485e+07	1.35105e+07	1.36724e+07	1.38344e+07	1.39963e+07
Tauron2	intensity	POL	Tauron Group Consolidated Annual Report 2022; https://en.tauron.pl/investor-relations/financial-reports	intensity in 2022 and 2021													TRUE							0.707902	0.75	0.767	0.72	0.704	0.624167	0.544333	0.4645	0.384667	0.304833	0.225	0.186	0.147	0.108	0.069	0.03	0.024	0.018	0.012	0.006	0
Tauron3	cumulative emissions	POL																						8848777	20539777	32555599	41676559	49779599	5.70504e+07	6.34808e+07	6.90446e+07	7.37154e+07	7.7467e+07	8.02731e+07	8.26194e+07	8.44948e+07	8.58881e+07	8.67881e+07	8.71837e+07	8.7504e+07	8.77472e+07	8.79113e+07	8.79943e+07	8.79943e+07
Tauron4	SDA intensity	POL	Double check: if emissions and output in year X should come from a source in the same year + if we take electricity and heat or just electricity.					0.439902																0.707902	0.616852	0.611022	0.68688	0.722883	0.711116	0.693465	0.675814	0.658163	0.640512	0.622861	0.576159	0.529457	0.482755	0.436053	0.389351	0.365081	0.340811	0.316541	0.29227	0.268
Tauron5	SDA cumulative emissions	POL																						8848777	1.84643e+07	2.80365e+07	3.67379e+07	4.50583e+07	5.3342e+07	6.15341e+07	6.9629e+07	7.76207e+07	8.55036e+07	9.32717e+07	1.0054e+08	1.07294e+08	1.13522e+08	1.1921e+08	1.24344e+08	1.29217e+08	1.33822e+08	1.3815e+08	1.42193e+08	1.45944e+08
Tauron6	marketshare	POL																						0.0707414	0.0871136	0.0864675	0.0690667	0.0619964	0.0619964	0.0619964	0.0619964	0.0619964	0.0619964	0.0619964	0.0619964	0.0619964	0.0619964	0.0619964	0.0619964	0.0619964	0.0619964	0.0619964	0.0619964	0.0619964
Tauron7	my	POL																						1	0.81206	0.818127	1.02425	1.14106	1.14106	1.14106	1.14106	1.14106	1.14106	1.14106	1.14106	1.14106	1.14106	1.14106	1.14106	1.14106	1.14106	1.14106	1.14106	1.14106
Tauron8	consumes total budget Y/N?	POL																						FALSE	FALSE	FALSE	FALSE	FALSE	FALSE	FALSE	FALSE	FALSE	FALSE	FALSE	FALSE	FALSE	FALSE	FALSE	FALSE	FALSE	FALSE	FALSE	FALSE	FALSE	FALSE	FALSE	FALSE	FALSE	FALSE
Tauron9	Cumulative overshoot	POL
Tauron10	CBD Cumulative emissions	POL																						6762500	1.50958e+07	2.33706e+07	2.99808e+07	3.5913e+07	4.18423e+07	4.77419e+07	5.36087e+07	5.94395e+07	6.52312e+07	7.09807e+07	7.64756e+07	8.17088e+07	8.66729e+07	9.13608e+07	9.57651e+07	1.00047e+08	1.04203e+08	1.08228e+08	1.12119e+08	1.1587e+08
Energa	emissions in tCO2e (scope 1)	POL																						1417857	2226247	2645799	1498097	1.45286e+06	1.4061e+06	1.36077e+06	1.31362e+06	1.26466e+06	1.21388e+06	1.16129e+06	1.11587e+06	1.06912e+06	1.02104e+06	971634	920893	870055	817710	763857	708496	651627
Energa1	output	POL																						2960000	3860000	4230000	3250000	3.28967e+06	3.32935e+06	3.37638e+06	3.42342e+06	3.47045e+06	3.51749e+06	3.56452e+06	3.60539e+06	3.64625e+06	3.68712e+06	3.72799e+06	3.76886e+06	3.81514e+06	3.86143e+06	3.90771e+06	3.954e+06	4.00028e+06
Energa2	intensity	POL	Energa Group's 2023 Non Financial Report; https://grupa.energa.pl/en/environment/csr-reports	Emissions and output in 2023													TRUE							0.479006	0.576748	0.625484	0.460953	0.441644	0.422335	0.403026	0.383717	0.364408	0.345099	0.32579	0.309501	0.293211	0.276922	0.260632	0.244343	0.228053	0.211764	0.195474	0.179185	0.162895
Energa3	cumulative emissions	POL	Energa Group's 2022 Non Financial Report; https://grupa.energa.pl/en/environment/csr-reports	Emissions and output in 2022																				1417857	3644104	6289903	7788000	9.24086e+06	1.0647e+07	1.20077e+07	1.33214e+07	1.4586e+07	1.57999e+07	1.69612e+07	1.80771e+07	1.91462e+07	2.01672e+07	2.11389e+07	2.20597e+07	2.29298e+07	2.37475e+07	2.45114e+07	2.52199e+07	2.58715e+07
Energa4	SDA intensity	POL	Energa Group's 2021 Non Financial Report; https://grupa.energa.pl/en/environment/csr-reports	Emissions and output in 2021				0.211006																0.479006	0.428016	0.412298	0.453453	0.448777	0.4441	0.437085	0.430071	0.423056	0.416041	0.409026	0.390466	0.371906	0.353347	0.334787	0.316227	0.306581	0.296936	0.287291	0.277645	0.268
Energa5	SDA cumulative emissions	POL	Energa Group's 2020 Non Financial Report; https://grupa.energa.pl/en/environment/csr-reports	Emissions and output in 2020 and 2019																				1417857	3.07e+06	4.81402e+06	6.28774e+06	7.76407e+06	9.24263e+06	1.07184e+07	1.21907e+07	1.36589e+07	1.51223e+07	1.65803e+07	1.79881e+07	1.93442e+07	2.0647e+07	2.18951e+07	2.30869e+07	2.42565e+07	2.54031e+07	2.65258e+07	2.76236e+07	2.86957e+07
Energa6	marketshare	POL	Double check if we take electricity and heat or just electricity.																					0.0167516	0.0215716	0.0233472	0.0177192	0.0177192	0.0177192	0.0177192	0.0177192	0.0177192	0.0177192	0.0177192	0.0177192	0.0177192	0.0177192	0.0177192	0.0177192	0.0177192	0.0177192	0.0177192	0.0177192	0.0177192
Energa7	my	POL																						1	0.776556	0.717497	0.945391	0.945391	0.945391	0.945391	0.945391	0.945391	0.945391	0.945391	0.945391	0.945391	0.945391	0.945391	0.945391	0.945391	0.945391	0.945391	0.945391	0.945391
Energa8	consumes total budget Y/N?	POL																						FALSE	FALSE	FALSE	FALSE	FALSE	FALSE	FALSE	FALSE	FALSE	FALSE	FALSE	FALSE	FALSE	FALSE	FALSE	FALSE	FALSE	FALSE	FALSE	FALSE	FALSE	FALSE	FALSE	FALSE	FALSE	FALSE
Energa9	Cumulative overshoot	POL
Energa10	CBD Cumulative emissions	POL																						1601360	3664916	5899202	7595052	9.29055e+06	1.09852e+07	1.26714e+07	1.43481e+07	1.60147e+07	1.767e+07	1.93132e+07	2.08837e+07	2.23794e+07	2.37982e+07	2.51381e+07	2.63969e+07	2.76208e+07	2.88085e+07	2.9959e+07	3.10708e+07	3.21429e+07
ZE PAK	emissions in tCO2e (scope 1)	POL	Management report 2024, https://ri.zepak.com.pl/upload/files/ZEPAK_2024-R_Sprawozdanie_Zarzadu_Z_Dzialalnosci_GKZEPAK_ANG.pdf	Intensity remains constant after 2028 (no target after 2028)	Each year from 2025 to 2028.	Intensity target																		5510000	4870000	3430000	1660000	1850000	1.88142e+06	1.908e+06	699424	482746	489289	495832	501516	507201	512886	518571	524255	530694	537132	543571	550009	556447
ZE PAK1	output	POL	Management report 2024, https://ri.zepak.com.pl/upload/files/ZEPAK_2024-R_Sprawozdanie_Zarzadu_Z_Dzialalnosci_GKZEPAK_ANG.pdf	Intensity in 2023 and 2024, emissions in 2020 to 2024. Intensity target for 2025, 2026, 2027, 2028.																				1530000	1530000	1530000	1530000	1430000	1.44725e+06	1.46769e+06	1.48814e+06	1.50858e+06	1.52903e+06	1.54947e+06	1.56724e+06	1.585e+06	1.60277e+06	1.62053e+06	1.6383e+06	1.65842e+06	1.67854e+06	1.69866e+06	1.71878e+06	1.7389e+06
ZE PAK2	intensity	POL	Management report 2022, https://ri.zepak.com.pl/upload/files/ZEPAK_2022-R_Sprawozdanie_Zarzadu_Z_Dzialalnosci_GKZEPAK_final___ENG.pdf	Intensity in 2020, 2021, 2022.													TRUE							1.01	0.99	0.87	1.35	1.3	1.3	1.3	0.47	0.32	0.32	0.32	0.32	0.32	0.32	0.32	0.32	0.32	0.32	0.32	0.32	0.32
ZE PAK3	cumulative emissions	POL																						5510000	10380000	13810000	15470000	17320000	1.92014e+07	2.11094e+07	2.18088e+07	2.22916e+07	2.27809e+07	2.32767e+07	2.37782e+07	2.42854e+07	2.47983e+07	2.53169e+07	2.58411e+07	2.63718e+07	2.6909e+07	2.74525e+07	2.80025e+07	2.8559e+07
ZE PAK4	SDA intensity	POL						0.742																1.01	1.00179	0.993133	0.984038	1.02391	1.00435	0.975021	0.945689	0.916357	0.887025	0.857693	0.780086	0.702479	0.624871	0.547264	0.469657	0.429325	0.388994	0.348663	0.308331	0.268
ZE PAK5	SDA cumulative emissions	POL																						1545300	3.07803e+06	4.59753e+06	6.1031e+06	7.56729e+06	9.02084e+06	1.04519e+07	1.18592e+07	1.32416e+07	1.45979e+07	1.59268e+07	1.71494e+07	1.82629e+07	1.92644e+07	2.01512e+07	2.09207e+07	2.16327e+07	2.22856e+07	2.28779e+07	2.34078e+07	2.38739e+07
ZE PAK6	marketshare	POL																						0.00865875	0.00855041	0.00844474	0.00834166	0.00770243	0.00770243	0.00770243	0.00770243	0.00770243	0.00770243	0.00770243	0.00770243	0.00770243	0.00770243	0.00770243	0.00770243	0.00770243	0.00770243	0.00770243	0.00770243	0.00770243
ZE PAK7	my	POL																						1	1.01267	1.02534	1.03801	1.12416	1.12416	1.12416	1.12416	1.12416	1.12416	1.12416	1.12416	1.12416	1.12416	1.12416	1.12416	1.12416	1.12416	1.12416	1.12416	1.12416
ZE PAK8	consumes total budget Y/N?	POL																						FALSE	FALSE	FALSE	FALSE	FALSE	FALSE	FALSE	FALSE	FALSE	FALSE	FALSE	FALSE	TRUE	TRUE	TRUE	TRUE	TRUE	TRUE	TRUE	TRUE	TRUE	FALSE	FALSE	FALSE	FALSE	FALSE
ZE PAK9	Cumulative overshoot	POL
ZE PAK10	CBD Cumulative emissions	POL																						827730	1645668	2453814	3252168	3989190	4.72584e+06	5.4588e+06	6.18769e+06	6.91211e+06	7.63167e+06	8.34598e+06	9.02867e+06	9.67884e+06	1.02956e+07	1.0878e+07	1.14252e+07	1.19572e+07	1.24735e+07	1.29736e+07	1.34569e+07	1.3923e+07
Polish companies	emissions in tCO2e (scope 1)	POL																						81057034	97165247	96401321	74621157	7.04795e+07	6.75324e+07	6.46266e+07	6.0378e+07	5.70138e+07	5.37652e+07	5.04092e+07	4.78534e+07	4.52266e+07	4.25288e+07	3.97599e+07	3.692e+07	3.48639e+07	3.27468e+07	3.05689e+07	2.833e+07	2.60303e+07
Polish companies1	output	POL																						97620000	116328000	113756000	95518000	9.27897e+07	9.39087e+07	9.52354e+07	9.65621e+07	9.78887e+07	9.92154e+07	1.00542e+08	1.01695e+08	1.02848e+08	1.04e+08	1.05153e+08	1.06306e+08	1.07611e+08	1.08917e+08	1.10222e+08	1.11528e+08	1.12833e+08
Polish companies2	intensity	POL															TRUE							0.830332	0.83527	0.847439	0.781226	0.759562	0.719129	0.678598	0.625276	0.582434	0.541904	0.501374	0.470559	0.439744	0.40893	0.378115	0.347301	0.32398	0.300659	0.277338	0.254017	0.230697
Polish companies3	cumulative emissions	POL																						81057034	178222281	274623602	349244759	4.19724e+08	4.87257e+08	5.51883e+08	6.12261e+08	6.69275e+08	7.2304e+08	7.73449e+08	8.21303e+08	8.66529e+08	9.09058e+08	9.48818e+08	9.85738e+08	1.0206e+09	1.05335e+09	1.08392e+09	1.11225e+09	1.13828e+09
Polish companies4	SDA intensity	POL						0.562332																0.830332	0.734674	0.739597	0.822598	0.831302	0.81673	0.794872	0.773014	0.751156	0.729298	0.70744	0.649607	0.591774	0.533941	0.476108	0.418275	0.38822	0.358165	0.32811	0.298055	0.268
Polish companies5	SDA cumulative emissions	POL																						81057034	1.6652e+08	2.50654e+08	3.29227e+08	4.06363e+08	4.83061e+08	5.58761e+08	6.33405e+08	7.06934e+08	7.79292e+08	8.5042e+08	9.16481e+08	9.77344e+08	1.03287e+09	1.08294e+09	1.1274e+09	1.16918e+09	1.20819e+09	1.24435e+09	1.2776e+09	1.30784e+09
Polish companies6	marketshare	POL																						0.552462	0.650099	0.627869	0.52077	0.499794	0.499794	0.499794	0.499794	0.499794	0.499794	0.499794	0.499794	0.499794	0.499794	0.499794	0.499794	0.499794	0.499794	0.499794	0.499794	0.499794
Polish companies7	my	POL																						1	0.849812	0.8799	1.06086	1.10538	1.10538	1.10538	1.10538	1.10538	1.10538	1.10538	1.10538	1.10538	1.10538	1.10538	1.10538	1.10538	1.10538	1.10538	1.10538	1.10538
Polish companies8	consumes total budget Y/N?	POL																						FALSE	FALSE	FALSE	FALSE	FALSE	FALSE	FALSE	FALSE	FALSE	FALSE	FALSE	FALSE	FALSE	FALSE	FALSE	FALSE	FALSE	FALSE	FALSE	FALSE	FALSE	FALSE	FALSE	FALSE	FALSE	FALSE
Polish companies9	Cumulative overshoot	POL
Polish companies10	CBD Cumulative emissions	POL																						52812420	1.15001e+08	1.75087e+08	2.24929e+08	2.72752e+08	3.20552e+08	3.68112e+08	4.15409e+08	4.62415e+08	5.09106e+08	5.55455e+08	5.99754e+08	6.41942e+08	6.81961e+08	7.19753e+08	7.55259e+08	7.89781e+08	8.23284e+08	8.55733e+08	8.87095e+08	9.17334e+08
CFE	emissions in tCO2e (scope 1)	MEX	https://www.cfe.gob.mx/finanzas/financial-economic-information/Documents/CFE%20Annual%20Green%2C%20Social%20and%20Sustainable%20Bond%20Report%202024.pdf		2028	Intensity target of 0.324 by 2028																82262500		1.02692e+08	1.01507e+08	1.10585e+08	1.22099e+08	1.22323e+08	1.13695e+08	1.0506e+08	9.60978e+07	8.68082e+07	8.81277e+07	8.94472e+07	9.16258e+07	9.38045e+07	9.59831e+07	9.81617e+07	1.0034e+08	1.04268e+08	1.08196e+08	1.12123e+08	1.16051e+08	1.19979e+08	1.26147e+08	1.32314e+08	1.38482e+08	1.4465e+08	1.50817e+08
CFE1	output	MEX	Annual Report 2024, https://www.cfe.gob.mx/finanzas/reportes-financieros/Reportes%20Anuales%20Documentos/Reporte%20Anual%202024.pdf	Output in all years																				210900000	220000000	234000000	248000000	252300000	2.55709e+08	2.59782e+08	2.63854e+08	2.67927e+08	2.71999e+08	2.76072e+08	2.82796e+08	2.8952e+08	2.96244e+08	3.02968e+08	3.09693e+08	3.21815e+08	3.33938e+08	3.4606e+08	3.58183e+08	3.70305e+08	3.89341e+08	4.08377e+08	4.27414e+08	4.4645e+08	4.65486e+08
CFE2	intensity	MEX	https://www.cfe.gob.mx/desarrollo_social/informes/Documents/Informe_RS_DC_2024.pdf	Emissions in 2018 and 2024													TRUE							0.486922	0.461394	0.472586	0.492335	0.484832	0.444624	0.404416	0.364208	0.324	0.324	0.324	0.324	0.324	0.324	0.324	0.324	0.324	0.324	0.324	0.324	0.324	0.324	0.324	0.324	0.324	0.324
CFE3	cumulative emissions	MEX	https://app.cfe.mx/Aplicaciones/OTROS/Boletines/boletin?i=9261&utm	Emissions in 2023																				1.02692e+08	2.04199e+08	3.14784e+08	4.36883e+08	5.59206e+08	6.729e+08	7.7796e+08	8.74058e+08	9.60866e+08	1.04899e+09	1.13844e+09	1.23007e+09	1.32387e+09	1.41985e+09	1.51802e+09	1.61836e+09	1.72262e+09	1.83082e+09	1.94294e+09	2.059e+09	2.17897e+09	2.30512e+09	2.43743e+09	2.57592e+09	2.72057e+09	2.87138e+09
CFE4	SDA intensity	MEX						0.457174																0.486922	0.460373	0.42706	0.39716	0.383214	0.370581	0.336447	0.302313	0.268179	0.234045	0.199911	0.190909	0.181907	0.172904	0.163902	0.1549	0.145898	0.136896	0.127893	0.118891	0.109889	0.101875	0.0938606	0.0858466	0.0778325	0.0698184
CFE5	SDA cumulative emissions	MEX																						1.02692e+08	2.03974e+08	3.03906e+08	4.02402e+08	4.99086e+08	5.93848e+08	6.81251e+08	7.61017e+08	8.3287e+08	8.9653e+08	9.5172e+08	1.00571e+09	1.05837e+09	1.1096e+09	1.15925e+09	1.20722e+09	1.25418e+09	1.29989e+09	1.34415e+09	1.38673e+09	1.42743e+09	1.46709e+09	1.50542e+09	1.54211e+09	1.57686e+09	1.60936e+09
CFE6	marketshare	MEX																						0.63535	0.65343	0.685359	0.716413	0.718986	0.718986	0.718986	0.718986	0.718986	0.718986	0.718986	0.718986	0.718986	0.718986	0.718986	0.718986	0.718986	0.718986	0.718986	0.718986	0.718986	0.718986	0.718986	0.718986	0.718986	0.718986
CFE7	my	MEX																						1	0.972331	0.927033	0.886849	0.883676	0.883676	0.883676	0.883676	0.883676	0.883676	0.883676	0.883676	0.883676	0.883676	0.883676	0.883676	0.883676	0.883676	0.883676	0.883676	0.883676	0.883676	0.883676	0.883676	0.883676	0.883676
CFE8	consumes total budget Y/N?	MEX																						FALSE	FALSE	FALSE	FALSE	FALSE	FALSE	FALSE	FALSE	FALSE	FALSE	FALSE	FALSE	FALSE	FALSE	FALSE	FALSE	FALSE	TRUE	TRUE	TRUE	TRUE	TRUE	TRUE	TRUE	TRUE	TRUE
CFE9	Cumulative overshoot	MEX
CFE10	CBD Cumulative emissions	MEX																						9.30994e+07	1.87384e+08	2.84656e+08	3.84556e+08	4.8294e+08	5.79361e+08	6.68282e+08	7.49419e+08	8.22489e+08	8.87207e+08	9.43292e+08	9.98149e+08	1.05165e+09	1.10368e+09	1.15412e+09	1.20283e+09	1.25049e+09	1.29689e+09	1.34179e+09	1.38498e+09	1.42624e+09	1.46644e+09	1.50527e+09	1.54242e+09	1.57758e+09	1.61043e+09
Naturgy Mexico	emissions in tCO2e (scope 1)	MEX	Integrated Annual Report 2024; https://stproportalcorporativo.blob.core.windows.net/uploads/2025/03/PACK_CONSO_2024_CNMV_ENG.pdf	Group-wide targets are applied to Spanish operations. This target "Reduce Scope 1 emissions from 14.74 MtCO2eq in the base year 2022 to 9.35 MtCO2eq in 2030, a reduction of 37%, a 54% reduction compared to 2017." was not used as it would lead to an increase in emissions compared with the 2027 intensity target.	2027;2030;2050	CO2 intensity in electricity generation (tCO2/GWh) of 184 in 2027.Achieve the Net Zero target for the group's Scope 1 and Scope 2 emissions.																82262500		6238979	5703109	5223484	5378964	5531346	4.65895e+06	3.77092e+06	2.85272e+06	2.77081e+06	2.68506e+06	2.59549e+06	2.52577e+06	2.44973e+06	2.36737e+06	2.27869e+06	2.18368e+06	2.11788e+06	2.04069e+06	1.95209e+06	1.8521e+06	1.74071e+06	1.64718e+06	1.53575e+06	1.40642e+06	1.25919e+06	1.09407e+06
Naturgy Mexico1	output	MEX	Integrated Annual Report 2024; https://stproportalcorporativo.blob.core.windows.net/uploads/2025/03/PACK_CONSO_2024_CNMV_ENG.pdf	Output in Mexico in 2024 and 2023, scope 1 emissions in 2024																				14532000	13999000	13266000	14567000	14825000	1.50253e+07	1.52646e+07	1.55039e+07	1.57432e+07	1.59825e+07	1.62218e+07	1.66169e+07	1.7012e+07	1.74071e+07	1.78022e+07	1.81974e+07	1.89097e+07	1.9622e+07	2.03343e+07	2.10466e+07	2.17589e+07	2.28775e+07	2.3996e+07	2.51146e+07	2.62331e+07	2.73517e+07
Naturgy Mexico2	intensity	MEX	Integrated Annual Report 2022; https://stproportalcorporativo.blob.core.windows.net/uploads/2023/02/Annual_Consolidated_Report_NATURGY_2022_ENG.pdf	Output in Mexico in 2022 and 2021.													TRUE							0.429327	0.407394	0.39375	0.369257	0.373109	0.310073	0.247036	0.184	0.176	0.168	0.16	0.152	0.144	0.136	0.128	0.12	0.112	0.104	0.096	0.088	0.08	0.072	0.064	0.056	0.048	0.04
Naturgy Mexico3	cumulative emissions	MEX	Integrated Annual Report 2021; https://stproportalcorporativo.blob.core.windows.net/uploads/2023/02/AnnualConsolidatedFinancialReportNaturgy2021.pdf	Output in Mexico in 2020.																				6238979	11942088	17165572	22544536	28075882	32734832	3.65058e+07	3.93585e+07	4.21293e+07	4.48143e+07	4.74098e+07	4.99356e+07	5.23853e+07	5.47527e+07	5.70314e+07	5.92151e+07	6.1333e+07	6.33736e+07	6.53257e+07	6.71778e+07	6.89185e+07	7.05657e+07	7.21015e+07	7.35079e+07	7.47671e+07	7.58611e+07
Naturgy Mexico4	SDA intensity	MEX	Sustainable Report 2020; https://stproportalcorporativo.blob.core.windows.net/uploads/2023/02/InformedeSostenibilidadyEINF_EN.pdf	Scope 1 emission in Mexico in 2020 (might slightly overestimate scope 1 emissions from electricity generation as these as scope 1 emissions for the group's activities in Mexico)				0.399579																0.429327	0.437311	0.451811	0.406456	0.392024	0.379077	0.344092	0.309107	0.274122	0.239137	0.204153	0.194926	0.185699	0.176473	0.167246	0.158019	0.148793	0.139566	0.13034	0.121113	0.111886	0.103673	0.0954587	0.0872449	0.079031	0.0708172
Naturgy Mexico5	SDA cumulative emissions	MEX	Sustainable Report 2021; https://stproportalcorporativo.blob.core.windows.net/uploads/2023/02/INFORME_SOSTENIBILIDAD_ENG.pdf	Scope 1 emission in Mexico in 2021 (might slightly overestimate scope 1 emissions from electricity generation as these as scope 1 emissions for the group's activities in Mexico)																				6238979	1.23609e+07	1.83546e+07	2.42755e+07	3.00872e+07	3.5783e+07	4.10354e+07	4.58278e+07	5.01434e+07	5.39654e+07	5.72771e+07	6.05162e+07	6.36753e+07	6.67472e+07	6.97245e+07	7.26001e+07	7.54137e+07	7.81523e+07	8.08026e+07	8.33516e+07	8.57862e+07	8.81579e+07	9.04486e+07	9.26397e+07	9.47129e+07	9.66499e+07
Naturgy Mexico6	marketshare	MEX	Sustainable Report 2022; https://stproportalcorporativo.blob.core.windows.net/uploads/2023/05/ISEINFF-2022_ENG.pdf	Scope 1 emission in Mexico in 2022 (might slightly overestimate scope 1 emissions from electricity generation as these as scope 1 emissions for the group's activities in Mexico)																				0.0437786	0.0415789	0.0388546	0.0420806	0.0422472	0.0422472	0.0422472	0.0422472	0.0422472	0.0422472	0.0422472	0.0422472	0.0422472	0.0422472	0.0422472	0.0422472	0.0422472	0.0422472	0.0422472	0.0422472	0.0422472	0.0422472	0.0422472	0.0422472	0.0422472	0.0422472
Naturgy Mexico7	my	MEX	Sustainable Report 2023; https://stproportalcorporativo.blob.core.windows.net/uploads/2024/04/IA_Naturgy_2023_ENG_ACC.pdf	Scope 1 emission in Mexico in 2023 (might slightly overestimate scope 1 emissions from electricity generation as these as scope 1 emissions for the group's activities in Mexico)																				1	1.0529	1.12673	1.04035	1.03625	1.03625	1.03625	1.03625	1.03625	1.03625	1.03625	1.03625	1.03625	1.03625	1.03625	1.03625	1.03625	1.03625	1.03625	1.03625	1.03625	1.03625	1.03625	1.03625	1.03625	1.03625
Naturgy Mexico8	consumes total budget Y/N?	MEX																						FALSE	FALSE	FALSE	FALSE	FALSE	FALSE	FALSE	FALSE	FALSE	FALSE	FALSE	FALSE	FALSE	FALSE	FALSE	FALSE	FALSE	FALSE	FALSE	FALSE	FALSE	FALSE	FALSE	FALSE	FALSE	FALSE
Naturgy Mexico9	Cumulative overshoot	MEX
Naturgy Mexico10	CBD Cumulative emissions	MEX																						6.41499e+06	1.24145e+07	1.79291e+07	2.3797e+07	2.95779e+07	3.52436e+07	4.04686e+07	4.52361e+07	4.95296e+07	5.33325e+07	5.6628e+07	5.98513e+07	6.29952e+07	6.60525e+07	6.90158e+07	7.1878e+07	7.46787e+07	7.74049e+07	8.00436e+07	8.25816e+07	8.50059e+07	8.73679e+07	8.96495e+07	9.18324e+07	9.38982e+07	9.58287e+07
Iberdrola Mexico	emissions in tCO2e (scope 1)	MEX	Informe de Gases de Efecto Invernadero 2024; https://www.iberdrola.com/documents/20125/41101/informe-gei-2024.pdf		2030	Carbon neutrality for direct emissions by 2030																82262500		5968099	6046557	5473831	5002813	3731399	3.15152e+06	2.56137e+06	1.95114e+06	1.32084e+06	670457	0	0	0	0	0	0	0	0	0	0	0	0	0	0	0	0
Iberdrola Mexico1	output	MEX	Informe de Gases de Efecto Invernadero 2024; https://www.iberdrola.com/documents/20125/41101/informe-gei-2024.pdf	Emissions intensity and scope 1 emissions in 2024																				1.83634e+07	1.96956e+07	1.88104e+07	1.71329e+07	1.32319e+07	1.34107e+07	1.36243e+07	1.38379e+07	1.40515e+07	1.4265e+07	1.44786e+07	1.48313e+07	1.51839e+07	1.55366e+07	1.58892e+07	1.62419e+07	1.68776e+07	1.75134e+07	1.81492e+07	1.87849e+07	1.94207e+07	2.04191e+07	2.14174e+07	2.24158e+07	2.34141e+07	2.44125e+07
Iberdrola Mexico2	intensity	MEX	Informe de Gases de Efecto Invernadero 2023; https://www.iberdrola.com/documents/20125/41101/informe-gei-2023.pdf	Emissions intensity and scope 1 emissions in 2021, 2022, and 2023													TRUE							0.325	0.307	0.291	0.292	0.282	0.235	0.188	0.141	0.094	0.047	0	0	0	0	0	0	0	0	0	0	0	0	0	0	0	0
Iberdrola Mexico3	cumulative emissions	MEX	Informe de Gases de Efecto Invernadero 2021; https://www.iberdrola.com/documents/20125/41101/Informe_GEI_2021.pdf	Emissions intensity and scope 1 emissions in 2020. Graphical analysis used to estimate Emissions intensity and scope 1 emissions in 2020																				5968099	12014656	17488487	22491300	26222699	2.93742e+07	3.19356e+07	3.38867e+07	3.52076e+07	3.5878e+07	3.5878e+07	3.5878e+07	3.5878e+07	3.5878e+07	3.5878e+07	3.5878e+07	3.5878e+07	3.5878e+07	3.5878e+07	3.5878e+07	3.5878e+07	3.5878e+07	3.5878e+07	3.5878e+07	3.5878e+07	3.5878e+07
Iberdrola Mexico4	SDA intensity	MEX						0.295252																0.325	0.300231	0.307679	0.32881	0.408739	0.395195	0.358596	0.321997	0.285398	0.248799	0.2122	0.202547	0.192895	0.183243	0.17359	0.163938	0.154286	0.144633	0.134981	0.125329	0.115676	0.107083	0.0984905	0.0898977	0.0813049	0.0727121
Iberdrola Mexico5	SDA cumulative emissions	MEX																						5.9681e+06	1.18813e+07	1.76689e+07	2.33024e+07	2.87108e+07	3.40106e+07	3.88962e+07	4.3352e+07	4.73622e+07	5.09114e+07	5.39837e+07	5.69877e+07	5.99166e+07	6.27636e+07	6.55218e+07	6.81845e+07	7.07885e+07	7.33215e+07	7.57713e+07	7.81256e+07	8.03721e+07	8.25586e+07	8.4668e+07	8.66831e+07	8.85868e+07	9.03619e+07
Iberdrola Mexico6	marketshare	MEX																						0.0553209	0.0584987	0.0550935	0.0494929	0.0377073	0.0377073	0.0377073	0.0377073	0.0377073	0.0377073	0.0377073	0.0377073	0.0377073	0.0377073	0.0377073	0.0377073	0.0377073	0.0377073	0.0377073	0.0377073	0.0377073	0.0377073	0.0377073	0.0377073	0.0377073	0.0377073
Iberdrola Mexico7	my	MEX																						1	0.945678	1.00413	1.11775	1.46711	1.46711	1.46711	1.46711	1.46711	1.46711	1.46711	1.46711	1.46711	1.46711	1.46711	1.46711	1.46711	1.46711	1.46711	1.46711	1.46711	1.46711	1.46711	1.46711	1.46711	1.46711
Iberdrola Mexico8	consumes total budget Y/N?	MEX																						FALSE	FALSE	FALSE	FALSE	FALSE	FALSE	FALSE	FALSE	FALSE	FALSE	FALSE	FALSE	FALSE	FALSE	FALSE	FALSE	FALSE	FALSE	FALSE	FALSE	FALSE	FALSE	FALSE	FALSE	FALSE	FALSE
Iberdrola Mexico9	Cumulative overshoot	MEX
Iberdrola Mexico10	CBD Cumulative emissions	MEX																						8.10631e+06	1.65472e+07	2.43665e+07	3.1268e+07	3.64278e+07	4.14846e+07	4.61481e+07	5.04034e+07	5.42355e+07	5.76297e+07	6.05711e+07	6.3448e+07	6.62541e+07	6.89828e+07	7.16277e+07	7.41823e+07	7.66821e+07	7.91153e+07	8.14704e+07	8.37357e+07	8.58995e+07	8.80077e+07	9.00441e+07	9.19924e+07	9.38362e+07	9.55593e+07
Mexican companies	emissions in tCO2e (scope 1)	MEX																				82262500		1.14899e+08	1.13256e+08	1.21282e+08	1.32481e+08	1.31586e+08	1.21505e+08	1.11392e+08	1.00902e+08	9.08999e+07	9.14832e+07	9.20427e+07	9.41516e+07	9.62542e+07	9.83505e+07	1.0044e+08	1.02524e+08	1.06386e+08	1.10236e+08	1.14076e+08	1.17903e+08	1.2172e+08	1.27794e+08	1.3385e+08	1.39888e+08	1.45909e+08	1.51912e+08
Mexican companies1	output	MEX																						2.43795e+08	2.53695e+08	2.66076e+08	2.797e+08	2.80357e+08	2.84146e+08	2.88671e+08	2.93196e+08	2.97721e+08	3.02247e+08	3.06772e+08	3.14244e+08	3.21716e+08	3.29188e+08	3.3666e+08	3.44132e+08	3.57602e+08	3.71073e+08	3.84544e+08	3.98014e+08	4.11485e+08	4.32638e+08	4.53791e+08	4.74944e+08	4.96097e+08	5.1725e+08
Mexican companies2	intensity	MEX															TRUE							0.471293	0.446428	0.455818	0.473654	0.469351	0.427615	0.38588	0.344144	0.305319	0.302677	0.300036	0.299613	0.29919	0.298767	0.298344	0.297921	0.297498	0.297075	0.296652	0.296229	0.295806	0.295383	0.29496	0.294537	0.294114	0.293691
Mexican companies3	cumulative emissions	MEX																						1.14899e+08	2.28155e+08	3.49438e+08	4.81918e+08	6.13504e+08	7.35009e+08	8.46401e+08	9.47303e+08	1.0382e+09	1.12969e+09	1.22173e+09	1.31588e+09	1.41213e+09	1.51049e+09	1.61093e+09	1.71345e+09	1.81984e+09	1.93007e+09	2.04415e+09	2.16205e+09	2.28377e+09	2.41156e+09	2.54541e+09	2.6853e+09	2.83121e+09	2.98312e+09
Mexican companies4	SDA intensity	MEX						0.441545																0.471293	0.446668	0.419854	0.393458	0.384884	0.372192	0.337897	0.303602	0.269306	0.235011	0.200715	0.191671	0.182626	0.173581	0.164536	0.155492	0.146447	0.137402	0.128357	0.119312	0.110268	0.102216	0.0941637	0.0861117	0.0780598	0.0700078
Mexican companies5	SDA cumulative emissions	MEX																						1.14899e+08	2.28216e+08	3.39929e+08	4.4998e+08	5.57884e+08	6.63641e+08	7.61182e+08	8.50197e+08	9.30375e+08	1.00141e+09	1.06298e+09	1.12321e+09	1.18197e+09	1.23911e+09	1.2945e+09	1.34801e+09	1.40038e+09	1.45136e+09	1.50072e+09	1.54821e+09	1.59358e+09	1.63781e+09	1.68054e+09	1.72144e+09	1.76016e+09	1.79637e+09
Mexican companies6	marketshare	MEX																						0.73445	0.753507	0.779307	0.807987	0.79894	0.79894	0.79894	0.79894	0.79894	0.79894	0.79894	0.79894	0.79894	0.79894	0.79894	0.79894	0.79894	0.79894	0.79894	0.79894	0.79894	0.79894	0.79894	0.79894	0.79894	0.79894
Mexican companies7	my	MEX																						1	0.974708	0.94244	0.908988	0.91928	0.91928	0.91928	0.91928	0.91928	0.91928	0.91928	0.91928	0.91928	0.91928	0.91928	0.91928	0.91928	0.91928	0.91928	0.91928	0.91928	0.91928	0.91928	0.91928	0.91928	0.91928
Mexican companies8	consumes total budget Y/N?	MEX																						FALSE	FALSE	FALSE	FALSE	FALSE	FALSE	FALSE	FALSE	FALSE	FALSE	FALSE	FALSE	FALSE	FALSE	FALSE	FALSE	FALSE	TRUE	TRUE	TRUE	TRUE	TRUE	TRUE	TRUE	TRUE	TRUE
Mexican companies9	Cumulative overshoot	MEX
Mexican companies10	CBD Cumulative emissions	MEX																						1.07621e+08	2.16346e+08	3.26952e+08	4.39621e+08	5.48945e+08	6.5609e+08	7.54899e+08	8.45059e+08	9.26254e+08	9.9817e+08	1.06049e+09	1.12145e+09	1.1809e+09	1.23872e+09	1.29476e+09	1.34889e+09	1.40185e+09	1.45341e+09	1.50331e+09	1.5513e+09	1.59715e+09	1.64182e+09	1.68496e+09	1.72624e+09	1.76531e+09	1.80182e+09
Elektroprivreda Srbije (EPS a.d.)	emissions in tCO2e (scope 1)	SRB																					2.73903e+07	2.86392e+07	2.58562e+07	2.65246e+07	2.49306e+07	2.50937e+07	2.45032e+07	2.51878e+07	2.59118e+07	2.66786e+07	2.74922e+07	2.8357e+07	2.84495e+07	2.85498e+07	2.86592e+07	2.87787e+07	2.89099e+07	2.90546e+07	2.9215e+07	2.93937e+07	2.95942e+07	2.98207e+07	3.00784e+07	3.03745e+07	3.07181e+07	3.11217e+07	3.16025e+07
Elektroprivreda Srbije (EPS a.d.)1	output	SRB	Annual Report 2024; https://www.eps.rs/eng/Documents/technicalreports/TEH_Godisnjak2024_web_en_.pdf	Output in 2024																			33482000	34009000	31834000	31130000	34720000	31861000	3.11112e+07	3.19804e+07	3.28996e+07	3.38733e+07	3.49062e+07	3.60042e+07	3.61217e+07	3.62491e+07	3.63879e+07	3.65397e+07	3.67063e+07	3.689e+07	3.70936e+07	3.73206e+07	3.75752e+07	3.78627e+07	3.81899e+07	3.85658e+07	3.90021e+07	3.95146e+07	4.01251e+07
Elektroprivreda Srbije (EPS a.d.)2	intensity	SRB	Annual Report 2023; https://www.eps.rs/eng/Documents/technicalreports/TEH_Godisnjak2023_web_en_.pdf	Output in 2023													TRUE						0.818061	0.842108	0.812219	0.85206	0.718046	0.787601	0.787601	0.787601	0.787601	0.787601	0.787601	0.787601	0.787601	0.787601	0.787601	0.787601	0.787601	0.787601	0.787601	0.787601	0.787601	0.787601	0.787601	0.787601	0.787601	0.787601	0.787601
Elektroprivreda Srbije (EPS a.d.)3	cumulative emissions	SRB	Annual Report 2022; https://www.eps.rs/eng/Documents/technicalreports/20230421_TEH_Godisnjak2022_web_en_.pdf	Output in 2022																			2.73903e+07	5.60296e+07	8.18857e+07	1.0841e+08	1.33341e+08	1.58435e+08	1.82938e+08	2.08126e+08	2.34037e+08	2.60716e+08	2.88208e+08	3.16565e+08	3.45015e+08	3.73564e+08	4.02224e+08	4.31002e+08	4.59912e+08	4.88967e+08	5.18182e+08	5.47576e+08	5.7717e+08	6.0699e+08	6.37069e+08	6.67443e+08	6.98161e+08	7.29283e+08	7.60886e+08
Elektroprivreda Srbije (EPS a.d.)4	SDA intensity	SRB	Annual Report 2021; https://www.eps.rs/eng/Documents/technicalreports/TEH_Godisnjak2021_web_en_Fin.pdf	Output in 2021				0.698061															0.818061	0.824258	0.837911	0.819036	0.715406	0.734821	0.714975	0.695129	0.675282	0.655436	0.635589	0.615743	0.590956	0.566169	0.541381	0.516594	0.491807	0.46702	0.442233	0.417446	0.392659	0.367871	0.343084	0.318297	0.29351	0.268723	0.243936
Elektroprivreda Srbije (EPS a.d.)5	SDA cumulative emissions	SRB	Annual Report 2020; https://www.eps.rs/eng/Documents/technicalreports/TEH_Godisnjak2020_web_s_en_.pdf	Output in 2020																			2.73903e+07	5.54225e+07	8.20966e+07	1.07593e+08	1.32432e+08	1.55844e+08	1.78088e+08	2.00318e+08	2.22535e+08	2.44737e+08	2.66923e+08	2.89092e+08	3.10438e+08	3.30962e+08	3.50661e+08	3.69537e+08	3.8759e+08	4.04818e+08	4.21222e+08	4.36802e+08	4.51556e+08	4.65484e+08	4.78587e+08	4.90862e+08	5.0231e+08	5.12928e+08	5.22716e+08
Elektroprivreda Srbije (EPS a.d.)6	marketshare	SRB	Environmental Reports 2020 to 2024, https://www.eps.rs/eng/Pages/Sredina-izvestaji.aspx	Emissions for 2020 to 2024																			0.717131	0.724663	0.690559	0.688333	0.783632	0.735155	0.735155	0.735155	0.735155	0.735155	0.735155	0.735155	0.735155	0.735155	0.735155	0.735155	0.735155	0.735155	0.735155	0.735155	0.735155	0.735155	0.735155	0.735155	0.735155	0.735155	0.735155
Elektroprivreda Srbije (EPS a.d.)7	my	SRB	Annual Report 2019; https://www.eps.rs/eng/Documents/technicalreports/TEH_Godisnjak2019_web_en.pdf	Output in 2019																			1	0.989605	1.03848	1.04184	0.915137	0.975482	0.975482	0.975482	0.975482	0.975482	0.975482	0.975482	0.975482	0.975482	0.975482	0.975482	0.975482	0.975482	0.975482	0.975482	0.975482	0.975482	0.975482	0.975482	0.975482	0.975482	0.975482
Elektroprivreda Srbije (EPS a.d.)8	consumes total budget Y/N?	SRB																					FALSE	FALSE	FALSE	FALSE	FALSE	FALSE	FALSE	FALSE	FALSE	FALSE	FALSE	FALSE	FALSE	FALSE	FALSE	FALSE	FALSE	FALSE	FALSE	FALSE	TRUE	TRUE	TRUE	TRUE	TRUE	TRUE	TRUE
Elektroprivreda Srbije (EPS a.d.)9	Cumulative overshoot	SRB																					1	1.01095	0.997432	1.0076	1.00686	1.01662	1.02723	1.03897	1.05169	1.06529	1.07974	1.09503	1.11138	1.12872	1.14704	1.16633	1.1866	1.20787	1.23019	1.2536	1.27818	1.304	1.33115	1.35974	1.3899	1.4218	1.45564
Elektroprivreda Srbije (EPS a.d.)10	CBD Cumulative emissions	SRB																					2.42536e+07	4.92893e+07	7.21631e+07	9.39827e+07	1.17707e+08	1.38917e+08	1.59079e+08	1.79241e+08	1.99404e+08	2.19566e+08	2.39728e+08	2.59891e+08	2.79324e+08	2.98029e+08	3.16004e+08	3.33251e+08	3.49769e+08	3.65558e+08	3.80618e+08	3.94949e+08	4.08551e+08	4.21425e+08	4.33569e+08	4.44984e+08	4.55671e+08	4.65629e+08	4.74857e+08
Serbian companies	emissions in tCO2e (scope 1)	SRB																					2.73903e+07	2.86392e+07	2.58562e+07	2.65246e+07	2.49306e+07	2.50937e+07	2.45032e+07	2.51878e+07	2.59118e+07	2.66786e+07	2.74922e+07	2.8357e+07	2.84495e+07	2.85498e+07	2.86592e+07	2.87787e+07	2.89099e+07	2.90546e+07	2.9215e+07	2.93937e+07	2.95942e+07	2.98207e+07	3.00784e+07	3.03745e+07	3.07181e+07	3.11217e+07	3.16025e+07
Serbian companies1	output	SRB	Annual Report 2024; https://www.eps.rs/eng/Documents/technicalreports/TEH_Godisnjak2024_web_en_.pdf	Output in 2024																			33482000	34009000	31834000	31130000	34720000	31861000	3.11112e+07	3.19804e+07	3.28996e+07	3.38733e+07	3.49062e+07	3.60042e+07	3.61217e+07	3.62491e+07	3.63879e+07	3.65397e+07	3.67063e+07	3.689e+07	3.70936e+07	3.73206e+07	3.75752e+07	3.78627e+07	3.81899e+07	3.85658e+07	3.90021e+07	3.95146e+07	4.01251e+07
Serbian companies2	intensity	SRB	Annual Report 2023; https://www.eps.rs/eng/Documents/technicalreports/TEH_Godisnjak2023_web_en_.pdf	Output in 2023													TRUE						0.818061	0.842108	0.812219	0.85206	0.718046	0.787601	0.787601	0.787601	0.787601	0.787601	0.787601	0.787601	0.787601	0.787601	0.787601	0.787601	0.787601	0.787601	0.787601	0.787601	0.787601	0.787601	0.787601	0.787601	0.787601	0.787601	0.787601
Serbian companies3	cumulative emissions	SRB	Annual Report 2022; https://www.eps.rs/eng/Documents/technicalreports/20230421_TEH_Godisnjak2022_web_en_.pdf	Output in 2022																			2.73903e+07	5.60296e+07	8.18857e+07	1.0841e+08	1.33341e+08	1.58435e+08	1.82938e+08	2.08126e+08	2.34037e+08	2.60716e+08	2.88208e+08	3.16565e+08	3.45015e+08	3.73564e+08	4.02224e+08	4.31002e+08	4.59912e+08	4.88967e+08	5.18182e+08	5.47576e+08	5.7717e+08	6.0699e+08	6.37069e+08	6.67443e+08	6.98161e+08	7.29283e+08	7.60886e+08
Serbian companies4	SDA intensity	SRB	Annual Report 2021; https://www.eps.rs/eng/Documents/technicalreports/TEH_Godisnjak2021_web_en_Fin.pdf	Output in 2021				0.698061															0.818061	0.824258	0.837911	0.819036	0.715406	0.734821	0.714975	0.695129	0.675282	0.655436	0.635589	0.615743	0.590956	0.566169	0.541381	0.516594	0.491807	0.46702	0.442233	0.417446	0.392659	0.367871	0.343084	0.318297	0.29351	0.268723	0.243936
Serbian companies5	SDA cumulative emissions	SRB	Annual Report 2020; https://www.eps.rs/eng/Documents/technicalreports/TEH_Godisnjak2020_web_s_en_.pdf	Output in 2020																			2.73903e+07	5.54225e+07	8.20966e+07	1.07593e+08	1.32432e+08	1.55844e+08	1.78088e+08	2.00318e+08	2.22535e+08	2.44737e+08	2.66923e+08	2.89092e+08	3.10438e+08	3.30962e+08	3.50661e+08	3.69537e+08	3.8759e+08	4.04818e+08	4.21222e+08	4.36802e+08	4.51556e+08	4.65484e+08	4.78587e+08	4.90862e+08	5.0231e+08	5.12928e+08	5.22716e+08
Serbian companies6	marketshare	SRB	Environmental Reports 2020 to 2024, https://www.eps.rs/eng/Pages/Sredina-izvestaji.aspx	Emissions for 2020 to 2024																			0.717131	0.724663	0.690559	0.688333	0.783632	0.735155	0.735155	0.735155	0.735155	0.735155	0.735155	0.735155	0.735155	0.735155	0.735155	0.735155	0.735155	0.735155	0.735155	0.735155	0.735155	0.735155	0.735155	0.735155	0.735155	0.735155	0.735155
Serbian companies7	my	SRB	Annual Report 2019; https://www.eps.rs/eng/Documents/technicalreports/TEH_Godisnjak2019_web_en.pdf	Output in 2019																			1	0.989605	1.03848	1.04184	0.915137	0.975482	0.975482	0.975482	0.975482	0.975482	0.975482	0.975482	0.975482	0.975482	0.975482	0.975482	0.975482	0.975482	0.975482	0.975482	0.975482	0.975482	0.975482	0.975482	0.975482	0.975482	0.975482
Serbian companies8	consumes total budget Y/N?	SRB																					FALSE	FALSE	FALSE	FALSE	FALSE	FALSE	FALSE	FALSE	FALSE	FALSE	FALSE	FALSE	FALSE	FALSE	FALSE	FALSE	FALSE	FALSE	FALSE	FALSE	TRUE	TRUE	TRUE	TRUE	TRUE	TRUE	TRUE
Serbian companies9	Cumulative overshoot	SRB																					1	1.01095	0.997432	1.0076	1.00686	1.01662	1.02723	1.03897	1.05169	1.06529	1.07974	1.09503	1.11138	1.12872	1.14704	1.16633	1.1866	1.20787	1.23019	1.2536	1.27818	1.304	1.33115	1.35974	1.3899	1.4218	1.45564
Serbian companies10	CBD Cumulative emissions	SRB																					2.42536e+07	4.92893e+07	7.21631e+07	9.39827e+07	1.17707e+08	1.38917e+08	1.59079e+08	1.79241e+08	1.99404e+08	2.19566e+08	2.39728e+08	2.59891e+08	2.79324e+08	2.98029e+08	3.16004e+08	3.33251e+08	3.49769e+08	3.65558e+08	3.80618e+08	3.94949e+08	4.08551e+08	4.21425e+08	4.33569e+08	4.44984e+08	4.55671e+08	4.65629e+08	4.74857e+08
KEPCO	emissions in tCO2e (scope 1)	KOR																					198540000	171985584	171252033	162105787	146192751	1.42646e+08	1.38955e+08	1.35121e+08	1.31143e+08	1.27021e+08	1.22756e+08	1.18347e+08	1.1414e+08	1.09754e+08	1.05188e+08	1.00441e+08	9.55143e+07	8.97053e+07	8.38165e+07	7.78479e+07
KEPCO1	output	KOR	https://www.kepco.co.kr/eng/sustainability/esg-report-center/sustainability-report/boardList.do																				409069939	394522000	400373000	408441000	391571000	3.96765e+08	4.0196e+08	4.07154e+08	4.12348e+08	4.17543e+08	4.22737e+08	4.27931e+08	4.34444e+08	4.40957e+08	4.4747e+08	4.53983e+08	4.60495e+08	4.63381e+08	4.66267e+08	4.69153e+08
KEPCO2	intensity	KOR	KEPCO 2023 Sustainability Report	Output and scope 1 emissions for 2020, 2021, 2022													TRUE						0.485345	0.435934	0.427731	0.396889	0.373349	0.359522	0.345694	0.331866	0.318038	0.304211	0.290383	0.276555	0.262727	0.2489	0.235072	0.221244	0.207416	0.193589	0.179761	0.165933
KEPCO3	cumulative emissions	KOR	KEPCO 2022 Sustainability Report	Output and scope 1 emissions for 2019																			198540000	370525584	541777617	703883404	850076155	9.92722e+08	1.13168e+09	1.2668e+09	1.39794e+09	1.52496e+09	1.64772e+09	1.76606e+09	1.8802e+09	1.98996e+09	2.09514e+09	2.19559e+09	2.2911e+09	2.3808e+09	2.46462e+09	2.54247e+09
KEPCO4	SDA intensity	KOR						0.367389															0.485345	0.47342	0.425078	0.43689	0.43753	0.42162	0.410572	0.39701	0.375504	0.343819	0.308103	0.251204	0.233433	0.215663	0.197892	0.180122	0.162351	0.147553	0.132754	0.117956
KEPCO5	SDA cumulative emissions	KOR																					198540000	3.85315e+08	5.55505e+08	7.33948e+08	9.05272e+08	1.07256e+09	1.23759e+09	1.39923e+09	1.55407e+09	1.69763e+09	1.82788e+09	1.93538e+09	2.03679e+09	2.13189e+09	2.22044e+09	2.30221e+09	2.37697e+09	2.44535e+09	2.50724e+09	2.56258e+09
KEPCO6	marketshare	KOR																					0.732893	0.714177	0.736925	0.713875	0.665937	0.665937	0.665937	0.665937	0.665937	0.665937	0.665937	0.665937	0.665937	0.665937	0.665937	0.665937	0.665937	0.665937	0.665937	0.665937
KEPCO7	my	KOR																					1	1.02621	0.994529	1.02664	1.10054	1.10054	1.10054	1.10054	1.10054	1.10054	1.10054	1.10054	1.10054	1.10054	1.10054	1.10054	1.10054	1.10054	1.10054	1.10054
KEPCO8	consumes total budget Y/N?	KOR																					FALSE	FALSE	FALSE	FALSE	FALSE	FALSE	FALSE	FALSE	FALSE	FALSE	FALSE	FALSE	FALSE	FALSE	FALSE	FALSE	FALSE	FALSE	FALSE	FALSE
KEPCO9	Cumulative overshoot	KOR																					1	0.961618	0.975289	0.959037	0.939028	0.925566	0.91442	0.905351	0.899533	0.898287	0.901436	0.912516	0.923121	0.933425	0.943572	0.953686	0.963873	0.973607	0.983	0.992151
KEPCO10	CBD Cumulative emissions	KOR																					1.83664e+08	3.53331e+08	5.11959e+08	6.74463e+08	8.231e+08	9.68541e+08	1.11225e+09	1.2533e+09	1.38888e+09	1.51534e+09	1.63101e+09	1.72818e+09	1.82049e+09	1.90778e+09	1.98985e+09	2.0665e+09	2.13756e+09	2.20344e+09	2.26409e+09	2.31943e+09
South Korean companies	emissions in tCO2e (scope 1)	KOR																					198540000	171985584	171252033	162105787	146192751	1.42646e+08	1.38955e+08	1.35121e+08	1.31143e+08	1.27021e+08	1.22756e+08	1.18347e+08	1.1414e+08	1.09754e+08	1.05188e+08	1.00441e+08	9.55143e+07	8.97053e+07	8.38165e+07	7.78479e+07
South Korean companies1	output	KOR	https://www.kepco.co.kr/eng/sustainability/esg-report-center/sustainability-report/boardList.do																				409069939	394522000	400373000	408441000	391571000	3.96765e+08	4.0196e+08	4.07154e+08	4.12348e+08	4.17543e+08	4.22737e+08	4.27931e+08	4.34444e+08	4.40957e+08	4.4747e+08	4.53983e+08	4.60495e+08	4.63381e+08	4.66267e+08	4.69153e+08
South Korean companies2	intensity	KOR	KEPCO 2023 Sustainability Report	Output and scope 1 emissions for 2020, 2021, 2022													TRUE						0.485345	0.435934	0.427731	0.396889	0.373349	0.359522	0.345694	0.331866	0.318038	0.304211	0.290383	0.276555	0.262727	0.2489	0.235072	0.221244	0.207416	0.193589	0.179761	0.165933
South Korean companies3	cumulative emissions	KOR	KEPCO 2022 Sustainability Report	Output and scope 1 emissions for 2019																			198540000	370525584	541777617	703883404	850076155	9.92722e+08	1.13168e+09	1.2668e+09	1.39794e+09	1.52496e+09	1.64772e+09	1.76606e+09	1.8802e+09	1.98996e+09	2.09514e+09	2.19559e+09	2.2911e+09	2.3808e+09	2.46462e+09	2.54247e+09
South Korean companies4	SDA intensity	KOR						0.367389															0.485345	0.47342	0.425078	0.43689	0.43753	0.42162	0.410572	0.39701	0.375504	0.343819	0.308103	0.251204	0.233433	0.215663	0.197892	0.180122	0.162351	0.147553	0.132754	0.117956
South Korean companies5	SDA cumulative emissions	KOR																					198540000	3.85315e+08	5.55505e+08	7.33948e+08	9.05272e+08	1.07256e+09	1.23759e+09	1.39923e+09	1.55407e+09	1.69763e+09	1.82788e+09	1.93538e+09	2.03679e+09	2.13189e+09	2.22044e+09	2.30221e+09	2.37697e+09	2.44535e+09	2.50724e+09	2.56258e+09
South Korean companies6	marketshare	KOR																					0.732893	0.714177	0.736925	0.713875	0.665937	0.665937	0.665937	0.665937	0.665937	0.665937	0.665937	0.665937	0.665937	0.665937	0.665937	0.665937	0.665937	0.665937	0.665937	0.665937
South Korean companies7	my	KOR																					1	1.02621	0.994529	1.02664	1.10054	1.10054	1.10054	1.10054	1.10054	1.10054	1.10054	1.10054	1.10054	1.10054	1.10054	1.10054	1.10054	1.10054	1.10054	1.10054
South Korean companies8	consumes total budget Y/N?	KOR																					FALSE	FALSE	FALSE	FALSE	FALSE	FALSE	FALSE	FALSE	FALSE	FALSE	FALSE	FALSE	FALSE	FALSE	FALSE	FALSE	FALSE	FALSE	FALSE	FALSE
South Korean companies9	Cumulative overshoot	KOR																					1	0.961618	0.975289	0.959037	0.939028	0.925566	0.91442	0.905351	0.899533	0.898287	0.901436	0.912516	0.923121	0.933425	0.943572	0.953686	0.963873	0.973607	0.983	0.992151
South Korean companies10	CBD Cumulative emissions	KOR																					1.83664e+08	3.53331e+08	5.11959e+08	6.74463e+08	8.231e+08	9.68541e+08	1.11225e+09	1.2533e+09	1.38888e+09	1.51534e+09	1.63101e+09	1.72818e+09	1.82049e+09	1.90778e+09	1.98985e+09	2.0665e+09	2.13756e+09	2.20344e+09	2.26409e+09	2.31943e+09
EGAT	emissions in tCO2e (scope 1)	THA			2030;2050	the short-term target is CO2 intensity reduction of 30% of the base year (2021) and the long-term target is to achieve Carbon Neutrality by 2050																	31239074	31580335	3.37466e+07	3.34097e+07	3.46771e+07	3.48759e+07	3.51652e+07	3.43086e+07	3.33837e+07	3.24374e+07	3.14178e+07	3.04091e+07	2.9528e+07	2.8731e+07	2.78856e+07	2.71537e+07	2.6403e+07	2.55555e+07	2.46322e+07
EGAT1	output	THA	Sustainability Report 2024; https://www.egat.co.th/home/en/wp-content/uploads/2025/08/EGAT-SR2024-ENedit20250805.pdf	Output and emissions in 2024, 2023, 2021																			6.23161e+07	6.36243e+07	6.09548e+07	6.19384e+07	6.77037e+07	6.67454e+07	7.03268e+07	7.18462e+07	7.33656e+07	7.49936e+07	7.66215e+07	7.84665e+07	8.0203e+07	8.23735e+07	8.46526e+07	8.75829e+07	9.08388e+07	9.42032e+07	9.77847e+07
EGAT2	intensity	THA	Sustainability Report 2022; https://www.egat.co.th/home/wp-content/uploads/docs/sustainability-report/2022/EN/EGAT_Sustainability-Report_2022-EN.pdf	Output and emissions in 2022													TRUE						0.5013	0.496356	0.553633	0.539402	0.512188	0.522521	0.500025	0.477528	0.455032	0.432536	0.410039	0.387543	0.368166	0.348789	0.329412	0.310034	0.290657	0.27128	0.251903
EGAT3	cumulative emissions	THA	Sustainability Report 2020; https://www.egat.co.th/home/en/wp-content/uploads/2021/12/EGAT-SR-2020-EN.pdf		Emissions in 2020 and 2019, output in 2020, intensity in 2019																		31239074	62819409	9.6566e+07	1.29976e+08	1.64653e+08	1.99529e+08	2.34694e+08	2.69002e+08	3.02386e+08	3.34823e+08	3.66241e+08	3.9665e+08	4.26178e+08	4.54909e+08	4.82795e+08	5.09949e+08	5.36352e+08	5.61907e+08	5.86539e+08
EGAT4	SDA intensity	THA						0.325285															0.5013	0.486566	0.484414	0.478462	0.446747	0.43607	0.404309	0.368895	0.335487	0.303326	0.273076	0.243767	0.235515	0.226349	0.217535	0.20776	0.198246	0.18658	0.176015
EGAT5	SDA cumulative emissions	THA																					31239074	6.21965e+07	9.17238e+07	1.21359e+08	1.51605e+08	1.80711e+08	2.09145e+08	2.35649e+08	2.60262e+08	2.83009e+08	3.03933e+08	3.2306e+08	3.41949e+08	3.60594e+08	3.79009e+08	3.97206e+08	4.15214e+08	4.32791e+08	4.50002e+08
EGAT6	marketshare	THA																					0.111646	0.115175	0.112193	0.108256	0.115142	0.112026	0.116512	0.117511	0.118485	0.119607	0.120702	0.122108	0.122939	0.124401	0.125982	0.128473	0.131365	0.135382	0.139659
EGAT7	my	THA																					1	0.969362	0.995125	1.03131	0.969635	0.996605	0.958235	0.950091	0.942284	0.933442	0.924975	0.914324	0.908142	0.897468	0.886204	0.869021	0.849893	0.824676	0.799419
EGAT8	consumes total budget Y/N?	THA																					FALSE	FALSE	FALSE	FALSE	FALSE	FALSE	FALSE	FALSE	FALSE	FALSE	FALSE	FALSE	FALSE	TRUE	TRUE	TRUE	TRUE	TRUE	TRUE
EGAT9	Cumulative overshoot	THA																					1	1.01002	1.05279	1.071	1.08606	1.10413	1.12216	1.14154	1.16185	1.18308	1.20501	1.22779	1.24632	1.26155	1.27383	1.28384	1.29175	1.29833	1.30341
EGAT10	CBD Cumulative emissions	THA																					3.15311e+07	6.34067e+07	9.32983e+07	1.22626e+08	1.53719e+08	1.83135e+08	2.1251e+08	2.39952e+08	2.6546e+08	2.89036e+08	3.10678e+08	3.30388e+08	3.49835e+08	3.69021e+08	3.87944e+08	4.06605e+08	4.25005e+08	4.4281e+08	4.60022e+08
EGCO	emissions in tCO2e (scope 1)	THA		EGCO group operates internationally and does not report country-level data.		the short-term target is CO2 intensity reduction of 30% of the base year (2021) and the long-term target is to achieve Carbon Neutrality by 2050
EGCO1	output	THA	Sustainability Dashboard 2024, https://sustainability.egco.com/storage/document/sustainability-reports/2024/egco-sustainability-dashboard-2024-en.pdf	Output and emission in 2024
EGCO2	intensity	THA
EGCO3	cumulative emissions	THA
EGCO4	SDA intensity	THA						-0.176015
EGCO5	SDA cumulative emissions	THA
EGCO6	marketshare	THA
EGCO7	my	THA
EGCO8	consumes total budget Y/N?	THA
EGCO9	Cumulative overshoot	THA
EGCO10	CBD Cumulative emissions	THA
Ratch Group	emissions in tCO2e (scope 1)	THA	Annual Report 2024;https://ratch.listedcompany.com/misc/ar/ratch-ar2024-en.pdf		2030;2050	The Company aims to further reduce its GHG emissions intensity below the national GEF and achieve a 15% reduction in total emissions by 2030 compared to the 2015 (base year), which recorded emissions of 8,694,192 tCO2 e. The ultimate goal is to achieve carbon neutrality by 2050													8694192				5875291	6258865	6437043	8515787	4984325	5296098	4.84812e+06	4.40015e+06	3.95218e+06	3.5042e+06	3.05623e+06	2.60826e+06	2.47784e+06	2.34743e+06	2.21702e+06	2.08661e+06	1.95619e+06	1.82578e+06	1.69537e+06
Ratch Group1	output	THA	Annual Report 2024;https://ratch.listedcompany.com/misc/ar/ratch-ar2024-en.pdf	Scope 1 & 2 emissions in 2015 (baseline year) are used as a proxy for scope 1 emissions in 2015.																			14781912	15441032	16623713	21794359	14101637	17569157	1.85119e+07	1.89118e+07	1.93118e+07	1.97403e+07	2.01688e+07	2.06545e+07	2.11116e+07	2.16829e+07	2.22828e+07	2.30542e+07	2.39112e+07	2.47968e+07	2.57395e+07
Ratch Group2	intensity	THA	Sustainability Report 2024; https://www.ratch.co.th/storage/content/investor-relations/downloads/sustainability-report/sustainability-report-2024-en.pdf	Emissions and output in 2024, 2023, 2022													TRUE						0.397465	0.40534	0.387221	0.390734	0.353457	0.301443	0.261892	0.232666	0.204651	0.177515	0.151532	0.126281	0.117369	0.108262	0.0994945	0.0905089	0.0818108	0.0736297	0.0658663
Ratch Group3	cumulative emissions	THA	Sustainability Report 2021; https://www.ratch.co.th/storage/content/investor-relations/downloads/sustainability-report/sustainability-report-2021-en.pdf	Emissions and output in 2021, 2020, 2019																			5875291	12134156	18571199	27086986	32071311	37367409	4.22155e+07	4.66157e+07	5.05679e+07	5.40721e+07	5.71283e+07	5.97366e+07	6.22144e+07	6.45618e+07	6.67789e+07	6.88655e+07	7.08217e+07	7.26474e+07	7.43428e+07
Ratch Group4	SDA intensity	THA						0.22145															0.397465	0.382658	0.358629	0.31482	0.385921	0.335558	0.316072	0.294346	0.273851	0.25412	0.235561	0.21758	0.212518	0.206895	0.201487	0.19549	0.189654	0.182497	0.176015
Ratch Group5	SDA cumulative emissions	THA																					5875291	1.17839e+07	1.77457e+07	2.4607e+07	3.00491e+07	3.59446e+07	4.17957e+07	4.73623e+07	5.26508e+07	5.76672e+07	6.24182e+07	6.69122e+07	7.13988e+07	7.58849e+07	8.03746e+07	8.48815e+07	8.94163e+07	9.39417e+07	9.84722e+07
Ratch Group6	marketshare	THA																					0.0264834	0.0279519	0.0305975	0.0380923	0.0239824	0.0294883	0.0306691	0.030932	0.0311883	0.0314837	0.0317719	0.032142	0.0323608	0.0327457	0.0331619	0.0338176	0.0345787	0.0356361	0.036762
Ratch Group7	my	THA																					1	0.947464	0.86554	0.695244	1.10429	0.898097	0.86352	0.856181	0.849146	0.841177	0.833547	0.823949	0.818378	0.808759	0.798608	0.783124	0.765887	0.743162	0.720402
Ratch Group8	consumes total budget Y/N?	THA																					FALSE	FALSE	FALSE	FALSE	FALSE	FALSE	FALSE	FALSE	FALSE	FALSE	FALSE	FALSE	FALSE	FALSE	FALSE	FALSE	FALSE	FALSE	FALSE
Ratch Group9	Cumulative overshoot	THA																					1	1.02972	1.04652	1.10078	1.0673	1.03958	1.01005	0.984236	0.960438	0.937657	0.91525	0.89276	0.871364	0.850786	0.830845	0.811313	0.792044	0.773325	0.754962
Ratch Group10	CBD Cumulative emissions	THA																					7.47945e+06	1.52153e+07	2.33674e+07	3.36871e+07	4.01633e+07	4.79063e+07	5.56386e+07	6.2862e+07	6.95766e+07	7.57823e+07	8.14792e+07	8.66672e+07	9.17863e+07	9.68364e+07	1.01818e+08	1.0673e+08	1.11573e+08	1.1626e+08	1.2079e+08
Banpu Power	emissions in tCO2e (scope 1)	THA	Banpu Group Climate Report 2024;https://www.banpu.com/	Group-wide targets for scope 1 & 2 are applied to scope 1 emissions from power generation activities in Thailand	2030;2050	20% reduction in scope 1 and 2 emissions by 2030 compared to 2023, net zero by 2050																	9588300	9900527	9408680	8805351	9340736	9478310	9.14402e+06	8.80974e+06	8.47545e+06	8.14116e+06	7.80688e+06	7.47259e+06	7.09896e+06	6.72533e+06	6.3517e+06	5.97807e+06	5.60444e+06	5.23081e+06	4.85718e+06
Banpu Power1	output	THA	Banpu Power Sustainability Report 2024; https://www.banpupower.com/investor-relations/publications/sustainability-report/	Scope 1 emissions and output (BHCP + Banpu NextGen) from 2021 to 2024																			11436600	12162415	11766218	11285967	12235342	12313679	1.29744e+07	1.32547e+07	1.3535e+07	1.38354e+07	1.41357e+07	1.44761e+07	1.47964e+07	1.51969e+07	1.56173e+07	1.61579e+07	1.67586e+07	1.73793e+07	1.804e+07
Banpu Power2	intensity	THA	Banpu Power Sustainability Report 2023; https://www.banpupower.com/investor-relations/publications/sustainability-report/														TRUE						0.838387	0.814026	0.799635	0.780204	0.763423	0.769738	0.704774	0.664649	0.626186	0.588431	0.552281	0.516202	0.479775	0.442547	0.406708	0.369977	0.334421	0.300979	0.269245
Banpu Power3	cumulative emissions	THA																					9588300	19488827	28897507	37702858	47043594	56521904	6.56659e+07	7.44757e+07	8.29511e+07	9.10923e+07	9.88992e+07	1.06372e+08	1.13471e+08	1.20196e+08	1.26548e+08	1.32526e+08	1.3813e+08	1.43361e+08	1.48218e+08
Banpu Power4	SDA intensity	THA						0.662372															0.838387	0.783129	0.773076	0.796319	0.735864	0.702799	0.638463	0.566726	0.499053	0.433905	0.372628	0.313257	0.296543	0.277975	0.260121	0.24032	0.221048	0.197417	0.176015
Banpu Power5	SDA cumulative emissions	THA																					9588300	1.9113e+07	2.82092e+07	3.71964e+07	4.62e+07	5.4854e+07	6.31377e+07	7.06495e+07	7.74042e+07	8.34074e+07	8.86748e+07	9.32095e+07	9.75973e+07	1.01822e+08	1.05884e+08	1.09767e+08	1.13472e+08	1.16903e+08	1.20078e+08
Banpu Power6	marketshare	THA																					0.0204899	0.0220168	0.0216569	0.0197256	0.0208084	0.0206675	0.0214951	0.0216793	0.0218589	0.022066	0.022268	0.0225274	0.0226807	0.0229505	0.0232422	0.0237017	0.0242352	0.0249762	0.0257654
Banpu Power7	my	THA																					1	0.930649	0.946117	1.03874	0.984694	0.991409	0.953239	0.945137	0.937371	0.928575	0.920152	0.909557	0.903407	0.892789	0.881583	0.86449	0.845462	0.820376	0.795251
Banpu Power8	consumes total budget Y/N?	THA																					FALSE	FALSE	FALSE	FALSE	FALSE	FALSE	FALSE	FALSE	FALSE	FALSE	FALSE	FALSE	FALSE	TRUE	TRUE	TRUE	TRUE	TRUE	TRUE
Banpu Power9	Cumulative overshoot	THA																					1	1.01966	1.0244	1.01361	1.01826	1.03041	1.04004	1.05416	1.07166	1.09214	1.1153	1.14121	1.16264	1.18046	1.19515	1.20734	1.21731	1.22633	1.23435
Banpu Power10	CBD Cumulative emissions	THA																					5.78676e+06	1.18801e+07	1.76501e+07	2.29941e+07	2.86131e+07	3.40399e+07	3.94592e+07	4.45219e+07	4.9228e+07	5.35774e+07	5.75701e+07	6.12063e+07	6.47941e+07	6.83336e+07	7.18247e+07	7.52675e+07	7.86619e+07	8.19468e+07	8.51221e+07
GULF	emissions in tCO2e (scope 1)	THA																					8.35725e+06	8.41539e+06	5094990	6651222	11245262	13304395	1.34945e+07	1.36847e+07	1.38748e+07	1.4065e+07	1.42551e+07	1.44452e+07	1.3723e+07	1.30007e+07	1.22785e+07	1.15562e+07	1.08339e+07	1.01117e+07	9.38941e+06
GULF1	output	THA	ESG Performance Data 2024; https://sustainability.gulf.co.th/storage/document/sustainability-reports/2024/quantitative-esg-data-2024-en.pdf	Output and scope 1 emissions in 2021 to 2024, intensity in 2019																			1.98039e+07	2.07787e+07	13162988	17844187	31466827	38822896	4.09061e+07	4.17898e+07	4.26736e+07	4.36205e+07	4.45674e+07	4.56406e+07	4.66506e+07	4.79131e+07	4.92388e+07	5.09432e+07	5.2837e+07	5.47939e+07	5.68771e+07
GULF2	intensity	THA	Sustainability Report 2020, https://hub.optiwise.io/en/documents/52589/gulf-sd-report-2020-en.pdf	Scope 1 emissions and intensity													TRUE						0.422	0.405	0.387069	0.372739	0.357369	0.342695	0.329891	0.327464	0.325138	0.322439	0.319855	0.3165	0.294165	0.271339	0.249365	0.226845	0.205044	0.18454	0.165082
GULF3	cumulative emissions	THA																					8.35725e+06	1.67726e+07	2.18676e+07	2.85189e+07	3.97641e+07	5.30685e+07	6.6563e+07	8.02477e+07	9.41225e+07	1.08187e+08	1.22443e+08	1.36888e+08	1.50611e+08	1.63612e+08	1.7589e+08	1.87446e+08	1.9828e+08	2.08392e+08	2.17781e+08
GULF4	SDA intensity	THA						0.245985															0.422	0.404539	0.519226	0.428309	0.316004	0.283462	0.270339	0.255707	0.241904	0.228616	0.216118	0.204008	0.200599	0.196811	0.19317	0.189131	0.1852	0.18038	0.176015
GULF5	SDA cumulative emissions	THA																					8.35725e+06	1.67631e+07	2.35976e+07	3.12405e+07	4.11841e+07	5.21889e+07	6.32474e+07	7.39334e+07	8.42563e+07	9.42286e+07	1.0386e+08	1.13171e+08	1.2253e+08	1.31959e+08	1.41471e+08	1.51106e+08	1.60891e+08	1.70775e+08	1.80786e+08
GULF6	marketshare	THA																					0.0354809	0.0376144	0.0242277	0.0311881	0.053515	0.065161	0.0677702	0.0683511	0.0689173	0.0695702	0.070207	0.0710249	0.0715083	0.0723588	0.0732786	0.0747275	0.0764093	0.0787458	0.0812337
GULF7	my	THA																					1	0.94328	1.46447	1.13764	0.663008	0.544511	0.523547	0.519097	0.514832	0.510001	0.505375	0.499556	0.496178	0.490346	0.484192	0.474803	0.464353	0.450575	0.436775
GULF8	consumes total budget Y/N?	THA																					FALSE	FALSE	FALSE	FALSE	FALSE	FALSE	FALSE	FALSE	FALSE	FALSE	FALSE	FALSE	FALSE	FALSE	FALSE	TRUE	TRUE	TRUE	TRUE
GULF9	Cumulative overshoot	THA																					1	1.00057	0.926688	0.912882	0.965521	1.01685	1.05242	1.08541	1.1171	1.14814	1.17891	1.20956	1.22918	1.23986	1.2433	1.2405	1.23239	1.22027	1.20463
GULF10	CBD Cumulative emissions	THA																					1.00205e+07	2.04306e+07	2.68856e+07	3.53349e+07	4.97859e+07	6.68958e+07	8.39819e+07	9.99436e+07	1.14781e+08	1.28494e+08	1.41082e+08	1.52547e+08	1.63858e+08	1.75018e+08	1.86025e+08	1.96879e+08	2.07581e+08	2.17938e+08	2.27949e+08
GPSC Group	emissions in tCO2e (scope 1)	THA	Analyst Presentation 2025 Thailand Focus; https://gpsc.listedcompany.com/misc/presentation/20250827-gpsc-thailand-focus-2025.pdf	The company has a carbon neutrality target (2050) and a net zero target (2060). It is assumed that the carbon neutrality target is a commitment to offset all existing emissions while the net zero target is a commitment to reduce emissions related to the company's activities as much as possible and offset only residual emissions. Therefore, only the net zero target was used. Group-wide targets wer…	Carbon intensity reduced by 10% by 2025 and by 35% by 2030 compared with 2020; Net Zero by 2060																		4.61985e+06	7.1093e+06	7.319e+06	8.13444e+06	5.08097e+06	7.68861e+06	7.8055e+06	7.53113e+06	7.23803e+06	6.93622e+06	6.61433e+06	6.28977e+06	6.21467e+06	6.16276e+06	6.10708e+06	6.08447e+06	6.06794e+06	6.04097e+06	6.00936e+06
GPSC Group1	output	THA	Sustainable Performance Data 2024 (Environmental); https://www.gpscgroup.com/storage/download/sustainability-performance-data/gpsc-sustainability-environmental.pdf	Output and intensity in 2021, 2022, 2023, and 2024. Scope 1 emissions and intensity cover both electricity and steam, group-wide intensity was assumed to be equivalent to be carbon intensity from electricity generation to approximate scope 1 emissions that relate only to electricity generation.																			1.53995e+07	1.61575e+07	1.64842e+07	1.79568e+07	1.34417e+07	1.87071e+07	1.97109e+07	2.01367e+07	2.05626e+07	2.10188e+07	2.14751e+07	2.19922e+07	2.24789e+07	2.30873e+07	2.3726e+07	2.45473e+07	2.54599e+07	2.64028e+07	2.74066e+07
GPSC Group2	intensity	THA	Sustainability Report 2020; https://www.gpscgroup.com/storage/download/sd-report/gpsc-sd2020-en.pdf	Intensity in 2019 and 2020, output as estimated using country-level electricity generation growth rates													TRUE						0.3	0.44	0.444	0.453	0.378	0.411	0.396	0.374	0.352	0.33	0.308	0.286	0.276467	0.266933	0.2574	0.247867	0.238333	0.2288	0.219267
GPSC Group3	cumulative emissions	THA																					4.61985e+06	1.17292e+07	1.90481e+07	2.71826e+07	3.22636e+07	3.99522e+07	4.77577e+07	5.52888e+07	6.25268e+07	6.9463e+07	7.60774e+07	8.23672e+07	8.85818e+07	9.47446e+07	1.00852e+08	1.06936e+08	1.13004e+08	1.19045e+08	1.25054e+08
GPSC Group4	SDA intensity	THA						0.123985															0.3	0.291199	0.28343	0.274278	0.304457	0.263411	0.252737	0.240836	0.229608	0.2188	0.208634	0.198784	0.196011	0.192931	0.189968	0.186683	0.183486	0.179566	0.176015
GPSC Group5	SDA cumulative emissions	THA																					4.61985e+06	9.3249e+06	1.3997e+07	1.89222e+07	2.30146e+07	2.79423e+07	3.29239e+07	3.77736e+07	4.24949e+07	4.70938e+07	5.15743e+07	5.5946e+07	6.03521e+07	6.48063e+07	6.93135e+07	7.38961e+07	7.85676e+07	8.33087e+07	8.81326e+07
GPSC Group6	marketshare	THA																					0.0275899	0.0292489	0.0303408	0.031385	0.0228601	0.0313982	0.0326555	0.0329354	0.0332083	0.0335229	0.0338297	0.0342238	0.0344568	0.0348666	0.0353098	0.0360079	0.0368183	0.0379442	0.039143
GPSC Group7	my	THA																					1	0.94328	0.909332	0.879079	1.2069	0.878707	0.844876	0.837696	0.830812	0.823016	0.815551	0.80616	0.800709	0.791298	0.781366	0.766216	0.749351	0.727117	0.704848
GPSC Group8	consumes total budget Y/N?	THA																					FALSE	FALSE	FALSE	FALSE	FALSE	FALSE	FALSE	FALSE	FALSE	FALSE	FALSE	FALSE	TRUE	TRUE	TRUE	TRUE	TRUE	TRUE	TRUE
GPSC Group9	Cumulative overshoot	THA																					1	1.25783	1.36087	1.43655	1.40187	1.42981	1.45055	1.46369	1.4714	1.47499	1.4751	1.47226	1.46775	1.46197	1.45501	1.44711	1.4383	1.42896	1.41893
GPSC Group10	CBD Cumulative emissions	THA																					7.79193e+06	1.58868e+07	2.39705e+07	3.24731e+07	3.86462e+07	4.68907e+07	5.51237e+07	6.2815e+07	6.99645e+07	7.65721e+07	8.2638e+07	8.81621e+07	9.36127e+07	9.89899e+07	1.04294e+08	1.09524e+08	1.14681e+08	1.19671e+08	1.24495e+08
Thai companies	emissions in tCO2e (scope 1)	THA			Carbon intensity reduced by 10% by 2025 and by 35% by 2030 compared with 2020; Net Zero by 2060																		5.96798e+07	6.32644e+07	6.20063e+07	6.55165e+07	6.53284e+07	7.06433e+07	7.04573e+07	6.87343e+07	6.69242e+07	6.50839e+07	6.31504e+07	6.1225e+07	5.90424e+07	5.69672e+07	5.48398e+07	5.28591e+07	5.08655e+07	4.87647e+07	4.65836e+07
Thai companies1	output	THA																					1.23738e+08	1.28164e+08	1.18992e+08	1.3082e+08	1.38949e+08	1.54158e+08	1.6243e+08	1.65939e+08	1.69449e+08	1.73209e+08	1.76969e+08	1.8123e+08	1.8524e+08	1.90254e+08	1.95518e+08	2.02286e+08	2.09805e+08	2.17576e+08	2.25848e+08
Thai companies2	intensity	THA															TRUE						0.482307	0.493621	0.521097	0.500815	0.47016	0.458252	0.43377	0.414213	0.394953	0.375755	0.356845	0.337831	0.318734	0.299427	0.280485	0.261309	0.242441	0.224127	0.206261
Thai companies3	cumulative emissions	THA																					5.96798e+07	1.22944e+08	1.8495e+08	2.50467e+08	3.15795e+08	3.86439e+08	4.56896e+08	5.2563e+08	5.92554e+08	6.57638e+08	7.20789e+08	7.82014e+08	8.41056e+08	8.98023e+08	9.52863e+08	1.00572e+09	1.05659e+09	1.10535e+09	1.15194e+09
Thai companies4	SDA intensity	THA						0.306292															0.482307	0.464262	0.471393	0.443753	0.422659	0.386535	0.360824	0.332156	0.305111	0.279076	0.254588	0.230862	0.224182	0.216761	0.209626	0.201713	0.194012	0.184568	0.176015
Thai companies5	SDA cumulative emissions	THA																					5.96798e+07	1.19181e+08	1.75273e+08	2.33325e+08	2.92053e+08	3.51641e+08	4.1025e+08	4.65367e+08	5.17068e+08	5.65406e+08	6.10461e+08	6.523e+08	6.93827e+08	7.35067e+08	7.76052e+08	8.16856e+08	8.57561e+08	8.97718e+08	9.37471e+08
Thai companies6	marketshare	THA																					0.22169	0.232007	0.219016	0.228647	0.236308	0.258741	0.269102	0.271409	0.273657	0.27625	0.278778	0.282026	0.283946	0.287323	0.290975	0.296728	0.303406	0.312684	0.322563
Thai companies7	my	THA																					1	0.955533	1.01221	0.969573	0.93814	0.856802	0.823814	0.816813	0.810101	0.802499	0.79522	0.786063	0.780749	0.771572	0.761888	0.747115	0.730671	0.708991	0.687277
Thai companies8	consumes total budget Y/N?	THA																					FALSE	FALSE	FALSE	FALSE	FALSE	FALSE	FALSE	FALSE	FALSE	FALSE	FALSE	FALSE	FALSE	FALSE	TRUE	TRUE	TRUE	TRUE	TRUE
Thai companies9	Cumulative overshoot	THA																					1	1.03157	1.05521	1.07347	1.08129	1.09896	1.1137	1.1295	1.14599	1.16313	1.18073	1.19886	1.2122	1.22169	1.22783	1.23121	1.23208	1.23129	1.22877
Thai companies10	CBD Cumulative emissions	THA																					6.26098e+07	1.26819e+08	1.85172e+08	2.47115e+08	3.10928e+08	3.78867e+08	4.46713e+08	5.10094e+08	5.6901e+08	6.23462e+08	6.73448e+08	7.1897e+08	7.63887e+08	8.08198e+08	8.51905e+08	8.95006e+08	9.37502e+08	9.78626e+08	1.01838e+09
																									2021	2022	2023
AES Argentina	emissions in tCO2e (scope 1)	ARG	2023 Sustainability Report; https://www1.aesargentina.com.ar/sites/aesargentina/files/2024-10/AES%20Argentina%20-%20Sustainability%20Report%20%202023%20-%20ENG.pdf	Net zero by 2040 for electricity sales assumed to cover electricity generation too	2030;2040	intensity target of 0.16275 by 2030 (CDP Climate 2023); Net zero by 2040																	2.94647e+06	3.06834e+06	3.19021e+06	2.78989e+06	1.76256e+06	1.67329e+06	1.59397e+06	1.50949e+06	1.41236e+06	1.31821e+06	1.21891e+06	1.11444e+06	1.03051e+06	940465	838470	738699	632257	518034	396863	272913	139513	0	0	0	0	0	0
AES Argentina1	output	ARG	2023 Sustainability Report; https://www1.aesargentina.com.ar/sites/aesargentina/files/2024-10/AES%20Argentina%20-%20Sustainability%20Report%20%202023%20-%20ENG.pdf	Output and scope 1 emissions in 2021, 2022, and 2023																			1.11033e+07	1.15625e+07	12021781	11363717	5.97667e+06	6.06205e+06	6.19866e+06	6.33527e+06	6.43773e+06	6.57434e+06	6.71095e+06	6.84756e+06	7.03539e+06	7.22323e+06	7.35984e+06	7.56476e+06	7.76967e+06	7.95751e+06	8.12827e+06	8.38441e+06	8.57225e+06	8.86255e+06	9.03331e+06	9.22115e+06	9.42606e+06	9.63098e+06	9.83589e+06
AES Argentina2	intensity	ARG		No data is available for 2019 and 2020, so output was estimated using the yearly growth rate from the 1.5 Climate Analytics Argentina scenario and intensity was assumed to be constant.													TRUE						0.265369	0.265369	0.265369	0.245509	0.294907	0.276027	0.257148	0.238268	0.219389	0.200509	0.18163	0.16275	0.146475	0.1302	0.113925	0.09765	0.081375	0.0651	0.048825	0.03255	0.016275	0	0	0	0	0	0
AES Argentina3	cumulative emissions	ARG	CDP Climate Change Questionnaire 2023; https://www1.aesargentina.com.ar/sites/aesargentina/files/2024-07/CDP%20Climate%202023.pdf																				2.94647e+06	6.01482e+06	9.20503e+06	1.19949e+07	1.37575e+07	1.54308e+07	1.70247e+07	1.85342e+07	1.99466e+07	2.12648e+07	2.24837e+07	2.35982e+07	2.46287e+07	2.55691e+07	2.64076e+07	2.71463e+07	2.77786e+07	2.82966e+07	2.86935e+07	2.89664e+07	2.91059e+07	2.91059e+07	2.91059e+07	2.91059e+07	2.91059e+07	2.91059e+07	2.91059e+07
AES Argentina4	SDA intensity	ARG						0.201296															0.265369	0.262609	0.274169	0.266265	0.402457	0.392407	0.343169	0.327577	0.288946	0.273261	0.259966	0.230045	0.222945	0.186939	0.170033	0.14582	0.136492	0.111754	0.114434	0.109842	0.0929439	0.0887243	0.0863688	0.0838786	0.0812751	0.0787825	0.0763937
AES Argentina5	SDA cumulative emissions	ARG																					2.94647e+06	5.9829e+06	9.2789e+06	1.23047e+07	1.471e+07	1.70888e+07	1.9216e+07	2.12913e+07	2.31514e+07	2.4948e+07	2.66926e+07	2.82678e+07	2.98363e+07	3.11866e+07	3.2438e+07	3.35411e+07	3.46016e+07	3.54909e+07	3.64211e+07	3.7342e+07	3.81388e+07	3.89251e+07	3.97053e+07	4.04787e+07	4.12448e+07	4.20036e+07	4.2755e+07
AES Argentina6	marketshare	ARG																					0.0855987	0.0859899	0.0844374	0.0839426	0.0439048	0.0439048	0.0439048	0.0439048	0.0439048	0.0439048	0.0439048	0.0439048	0.0439048	0.0439048	0.0439048	0.0439048	0.0439048	0.0439048	0.0439048	0.0439048	0.0439048	0.0439048	0.0439048	0.0439048	0.0439048	0.0439048	0.0439048
AES Argentina7	my	ARG																					1	0.99545	1.01375	1.01973	1.94964	1.94964	1.94964	1.94964	1.94964	1.94964	1.94964	1.94964	1.94964	1.94964	1.94964	1.94964	1.94964	1.94964	1.94964	1.94964	1.94964	1.94964	1.94964	1.94964	1.94964	1.94964	1.94964
AES Argentina8	consumes total budget Y/N?	ARG																					FALSE	FALSE	FALSE	FALSE	FALSE	FALSE	FALSE	FALSE	FALSE	FALSE	FALSE	FALSE	FALSE	FALSE	FALSE	FALSE	FALSE	FALSE	FALSE	FALSE	FALSE	FALSE	FALSE	FALSE	FALSE	FALSE	FALSE
AES Argentina9	Cumulative overshoot	ARG
AES Argentina10	CBD Cumulative emissions	ARG																					3.50476e+06	7.12772e+06	1.10118e+07	1.45559e+07	1.62353e+07	1.78996e+07	1.94058e+07	2.08818e+07	2.22223e+07	2.35251e+07	2.47979e+07	2.59651e+07	2.71324e+07	2.81641e+07	2.91356e+07	3.00167e+07	3.08752e+07	3.16283e+07	3.24115e+07	3.31947e+07	3.39026e+07	3.46105e+07	3.53184e+07	3.60263e+07	3.67342e+07	3.74421e+07	3.815e+07
Central Puerto	emissions in tCO2e (scope 1)	ARG	2023 Sustainability Report; https://www.centralpuerto.com/en/sustainability/	No target																			7101669	6706700	8.67292e+06	8969292	9639136	9.77684e+06	9.99716e+06	1.02175e+07	1.03827e+07	1.0603e+07	1.08234e+07	1.10437e+07	1.13466e+07	1.16496e+07	1.18699e+07	1.22004e+07	1.25309e+07	1.28338e+07	1.31092e+07	1.35223e+07	1.38253e+07	1.42935e+07	1.45689e+07	1.48718e+07	1.52023e+07	1.55328e+07	1.58633e+07
Central Puerto1	output	ARG	2023 Sustainability Report; https://www.centralpuerto.com/en/sustainability/	Output and intensity in 2023 and 2022. Corporate reporting is inconsistent: the ratio of scope 1 emissions and electricity output does not match the reported intensity of the company. The reported output and intensity where used to estimate scope 1 emissions. Includes steam.																			15207000	14300000	16972453	17484000	20774000	2.10708e+07	2.15456e+07	22020440	2.23766e+07	22851400	2.33262e+07	2.38011e+07	2.4454e+07	2.51069e+07	2.55817e+07	2.62939e+07	2.70062e+07	2.76591e+07	2.82526e+07	2.9143e+07	2.97959e+07	3.08049e+07	3.13984e+07	3.20513e+07	3.27636e+07	3.34758e+07	3.41881e+07
Central Puerto2	intensity	ARG	2021 Sustainability Report; https://www.centralpuerto.com/en/sustainability/	Intensity in 2019, 2020, 2021 and output in 2021. Corporate reporting is inconsistent: the ratio of scope 1 emissions and electricity output does not match the reported intensity of the company. The reported output and intensity where used to estimate scope 1 emissions. Includes steam.													TRUE						0.467	0.469	0.511	0.513	0.464	0.464	0.464	0.464	0.464	0.464	0.464	0.464	0.464	0.464	0.464	0.464	0.464	0.464	0.464	0.464	0.464	0.464	0.464	0.464	0.464	0.464	0.464
Central Puerto3	cumulative emissions	ARG	2020 Sustainability Report; https://www.centralpuerto.com/en/sustainability/	Output in 2020. Includes steam.																			7101669	13808369	2.24813e+07	3.14506e+07	4.10897e+07	5.08666e+07	6.08637e+07	7.10812e+07	8.14639e+07	9.2067e+07	1.0289e+08	1.13934e+08	1.25281e+08	1.3693e+08	1.488e+08	1.61001e+08	1.73531e+08	1.86365e+08	1.99474e+08	2.12997e+08	2.26822e+08	2.41116e+08	2.55684e+08	2.70556e+08	2.85759e+08	3.01291e+08	3.17155e+08
Central Puerto4	SDA intensity	ARG	2019 Sustainability Report; https://www.centralpuerto.com/en/sustainability/	Output in 2019. Includes steam.				0.402927															0.467	0.504161	0.472039	0.424341	0.330962	0.323036	0.284201	0.271904	0.241434	0.229063	0.218577	0.194978	0.189378	0.160979	0.147646	0.128548	0.121191	0.10168	0.103793	0.100172	0.086844	0.0835159	0.0816581	0.079694	0.0776406	0.0756746	0.0737906
Central Puerto5	SDA cumulative emissions	ARG																					7101669	1.43112e+07	2.23228e+07	2.9742e+07	3.66174e+07	4.3424e+07	4.95473e+07	5.55348e+07	6.09372e+07	6.61716e+07	7.12702e+07	7.59109e+07	8.0542e+07	8.45836e+07	8.83607e+07	9.17407e+07	9.50136e+07	9.7826e+07	1.00758e+08	1.03678e+08	1.06265e+08	1.08838e+08	1.11402e+08	1.13956e+08	1.165e+08	1.19033e+08	1.21556e+08
Central Puerto6	marketshare	ARG																					0.117235	0.106348	0.119209	0.129152	0.152606	0.152606	0.152606	0.152606	0.152606	0.152606	0.152606	0.152606	0.152606	0.152606	0.152606	0.152606	0.152606	0.152606	0.152606	0.152606	0.152606	0.152606	0.152606	0.152606	0.152606	0.152606	0.152606
Central Puerto7	my	ARG																					1	1.10237	0.983441	0.907729	0.76822	0.76822	0.76822	0.76822	0.76822	0.76822	0.76822	0.76822	0.76822	0.76822	0.76822	0.76822	0.76822	0.76822	0.76822	0.76822	0.76822	0.76822	0.76822	0.76822	0.76822	0.76822	0.76822
Central Puerto8	consumes total budget Y/N?	ARG																					FALSE	FALSE	FALSE	FALSE	FALSE	FALSE	FALSE	FALSE	FALSE	FALSE	FALSE	FALSE	FALSE	TRUE	TRUE	TRUE	TRUE	TRUE	TRUE	TRUE	TRUE	TRUE	TRUE	TRUE	TRUE	TRUE	TRUE
Central Puerto9	Cumulative overshoot	ARG
Central Puerto10	CBD Cumulative emissions	ARG																					4.8001e+06	9.2808e+06	1.47644e+07	2.02173e+07	2.60545e+07	3.18395e+07	3.70747e+07	4.22052e+07	4.68645e+07	5.1393e+07	5.58167e+07	5.9874e+07	6.39313e+07	6.75174e+07	7.08941e+07	7.39567e+07	7.69408e+07	7.95584e+07	8.22807e+07	8.5003e+07	8.74636e+07	8.99241e+07	9.23847e+07	9.48452e+07	9.73058e+07	9.97663e+07	1.02227e+08
Pampa Energia	emissions in tCO2e (scope 1)	ARG	2023 Sustainability Report; https://pampa.com/en/sustainability/																				5804836	5844211	6544768	6726451	7385726	7.49124e+06	7.66005e+06	7.82887e+06	7.95548e+06	8.1243e+06	8.29312e+06	8.46193e+06	8.69405e+06	8.92618e+06	9.09499e+06	9.34822e+06	9.60144e+06	9.83357e+06	1.00446e+07	1.03611e+07	1.05932e+07	1.0952e+07	1.1163e+07	1.13951e+07	1.16483e+07	1.19016e+07	1.21548e+07
Pampa Energia1	output	ARG	2023 Sustainability Report; https://pampa.com/en/sustainability/	Emissions and output in 2022 and 2023, output in 2021.																			15900000	16800000	17800000	18700000	21400000	2.17057e+07	2.21949e+07	22684000	2.30509e+07	23540000	2.40291e+07	2.45183e+07	2.51909e+07	2.58634e+07	2.63526e+07	2.70863e+07	2.782e+07	2.84926e+07	2.9104e+07	3.00211e+07	3.06937e+07	3.17331e+07	3.23446e+07	3.30171e+07	3.37509e+07	3.44846e+07	3.52183e+07
Pampa Energia2	intensity	ARG	2021 Sustainability Report; https://ri.pampa.com/wp-content/uploads/sites/18/2023/07/Pampa-2021-Reporte-Sustentabilidad-ING-EE.pdf	Output in 2019, 2020, 2021. Emissions in 2020 and 2021.													TRUE						0.365084	0.34787	0.367684	0.359703	0.345127	0.345127	0.345127	0.345127	0.345127	0.345127	0.345127	0.345127	0.345127	0.345127	0.345127	0.345127	0.345127	0.345127	0.345127	0.345127	0.345127	0.345127	0.345127	0.345127	0.345127	0.345127	0.345127
Pampa Energia3	cumulative emissions	ARG	2020 Sustainability Report; https://ri.pampa.com/wp-content/uploads/sites/18/2022/01/Pampa-2020-Reporte-Sustentabilidad-ING-EE.pdf																				5804836	11649047	18193815	24920266	32305992	3.97972e+07	4.74573e+07	5.52862e+07	6.32416e+07	7.13659e+07	7.9659e+07	8.8121e+07	9.6815e+07	1.05741e+08	1.14836e+08	1.24184e+08	1.33786e+08	1.43619e+08	1.53664e+08	1.64025e+08	1.74618e+08	1.8557e+08	1.96733e+08	2.08128e+08	2.19777e+08	2.31678e+08	2.43833e+08
Pampa Energia4	SDA intensity	ARG	2023 Sustainability Report; https://pampa.com/en/sustainability/	Scope 1&2 used as a proxy for scope 1 emissions.				0.301011															0.365084	0.356674	0.367922	0.327181	0.266444	0.260433	0.230986	0.221662	0.198558	0.189178	0.181227	0.163333	0.159086	0.137553	0.127443	0.112962	0.107383	0.0925886	0.0941913	0.091445	0.0813393	0.0788157	0.0774071	0.0759178	0.0743608	0.07287	0.0714414
Pampa Energia5	SDA cumulative emissions	ARG																					5804836	1.1797e+07	1.8346e+07	2.44643e+07	3.01662e+07	3.58191e+07	4.09458e+07	4.59739e+07	5.05509e+07	5.50041e+07	5.93588e+07	6.33635e+07	6.7371e+07	7.09286e+07	7.4287e+07	7.73467e+07	8.03341e+07	8.29722e+07	8.57136e+07	8.84588e+07	9.09555e+07	9.34565e+07	9.59602e+07	9.84668e+07	1.00977e+08	1.03489e+08	1.06005e+08
Pampa Energia6	marketshare	ARG																					0.122578	0.124941	0.125022	0.138135	0.157205	0.157205	0.157205	0.157205	0.157205	0.157205	0.157205	0.157205	0.157205	0.157205	0.157205	0.157205	0.157205	0.157205	0.157205	0.157205	0.157205	0.157205	0.157205	0.157205	0.157205	0.157205	0.157205
Pampa Energia7	my	ARG																					1	0.98109	0.980452	0.887379	0.779733	0.779733	0.779733	0.779733	0.779733	0.779733	0.779733	0.779733	0.779733	0.779733	0.779733	0.779733	0.779733	0.779733	0.779733	0.779733	0.779733	0.779733	0.779733	0.779733	0.779733	0.779733	0.779733
Pampa Energia8	consumes total budget Y/N?	ARG																					FALSE	FALSE	FALSE	FALSE	FALSE	FALSE	FALSE	FALSE	FALSE	FALSE	FALSE	FALSE	FALSE	FALSE	FALSE	TRUE	TRUE	TRUE	TRUE	TRUE	TRUE	TRUE	TRUE	TRUE	TRUE	TRUE	TRUE
Pampa Energia9	Cumulative overshoot	ARG
Pampa Energia10	CBD Cumulative emissions	ARG																					5.01885e+06	1.02829e+07	1.60338e+07	2.1866e+07	2.78791e+07	3.38384e+07	3.92313e+07	4.45165e+07	4.93162e+07	5.39811e+07	5.85382e+07	6.27177e+07	6.68973e+07	7.05915e+07	7.40699e+07	7.72248e+07	8.02988e+07	8.29953e+07	8.57996e+07	8.8604e+07	9.11387e+07	9.36734e+07	9.62081e+07	9.87428e+07	1.01277e+08	1.03812e+08	1.06347e+08
YPF Luz	emissions in tCO2e (scope 1)	ARG	2024 YPF Luz Sustainability Report; https://luzzpstayee001.blob.core.windows.net/reporte-sostenibilidad/ReporteYLUZ2024.pd		2030	20% intensity reduction by 2030 compared with 2020																	2689022	3063856	3924586	3578316	4459942	5114706	5.13464e+06	5.15038e+06	5.13467e+06	5.14252e+06	5.14618e+06	5.14563e+06	5.02244e+06	4.88514e+06	4.701e+06	4.54766e+06	4.37892e+06	4.1858e+06	3.97022e+06	3.78031e+06	3.54291e+06	3.3299e+06	3.05466e+06	2.77171e+06	2.47914e+06	2.17117e+06	1.84781e+06
YPF Luz1	output	ARG	2024 YPF Sustainability Report; https://sustentabilidad.ypf.com/assets/docs/es/YPF-Reporte-de-sustentabilidad-2024.pdf	Group wide Net Zero target applied to YPF Luz																			8.67426e+06	7653530	9830810	9725610	12271600	14224140	1.45447e+07	1.48652e+07	1.51056e+07	1.54262e+07	1.57467e+07	1.60673e+07	1.6508e+07	1.69488e+07	1.72693e+07	1.77501e+07	1.82309e+07	1.86717e+07	1.90724e+07	1.96734e+07	2.01141e+07	2.07953e+07	2.1196e+07	2.16367e+07	2.21175e+07	2.25984e+07	2.30792e+07
YPF Luz2	intensity	ARG	2024 YPF Luz Sustainability Report; https://luzzpstayee001.blob.core.windows.net/reporte-sostenibilidad/ReporteYLUZ2024.pd	Scope 1 emissions and output in 2024, 2023, 2022													TRUE						0.31	0.400319	0.399213	0.367927	0.363436	0.359579	0.353025	0.346471	0.339917	0.333363	0.326809	0.320255	0.304243	0.28823	0.272217	0.256204	0.240192	0.224179	0.208166	0.192153	0.176141	0.160128	0.144115	0.128102	0.112089	0.0960766	0.0800639
YPF Luz3	cumulative emissions	ARG	2022 YPF Luz Sustainability Report; https://luzzpstayee001.blob.core.windows.net/reporte-sostenibilidad/ReporteYLUZ2022ENG.pdf?utm_source=chatgpt.com	Scope 1 emissions and output in 2021, 2020																			2689022	5752878	9677464	13255780	17715722	22830428	2.79651e+07	3.31154e+07	3.82501e+07	4.33926e+07	4.85388e+07	5.36844e+07	5.87069e+07	6.3592e+07	6.8293e+07	7.28407e+07	7.72196e+07	8.14054e+07	8.53756e+07	8.91559e+07	9.26988e+07	9.60287e+07	9.90834e+07	1.01855e+08	1.04334e+08	1.06505e+08	1.08353e+08
YPF Luz4	SDA intensity	ARG	2019 YPF Sustainability Report; https://sustentabilidad.ypf.com/assets/docs/en/YPF-Sustainability-report-2019.pdf	Intensity and scope 1 emissions in 2019				0.245927															0.31	0.350347	0.309289	0.289558	0.22137	0.197628	0.1776	0.171258	0.155544	0.149164	0.143756	0.131585	0.128697	0.114051	0.107174	0.0973248	0.0935305	0.0834681	0.0845581	0.0826902	0.0758168	0.0741004	0.0731422	0.0721293	0.0710703	0.0700564	0.0690847
YPF Luz5	SDA cumulative emissions	ARG																					2689022	5.37042e+06	8.41098e+06	1.12271e+07	1.39437e+07	1.67548e+07	1.93379e+07	2.18837e+07	2.42333e+07	2.65343e+07	2.8798e+07	3.09122e+07	3.30367e+07	3.49697e+07	3.68206e+07	3.85481e+07	4.02532e+07	4.18117e+07	4.34244e+07	4.50512e+07	4.65762e+07	4.81172e+07	4.96675e+07	5.12281e+07	5.28e+07	5.43832e+07	5.59776e+07
YPF Luz6	marketshare	ARG																					0.0668726	0.0569189	0.0690486	0.071842	0.0901476	0.103019	0.103019	0.103019	0.103019	0.103019	0.103019	0.103019	0.103019	0.103019	0.103019	0.103019	0.103019	0.103019	0.103019	0.103019	0.103019	0.103019	0.103019	0.103019	0.103019	0.103019	0.103019
YPF Luz7	my	ARG																					1	1.17488	0.968485	0.930828	0.741812	0.649127	0.649127	0.649127	0.649127	0.649127	0.649127	0.649127	0.649127	0.649127	0.649127	0.649127	0.649127	0.649127	0.649127	0.649127	0.649127	0.649127	0.649127	0.649127	0.649127	0.649127	0.649127
YPF Luz8	consumes total budget Y/N?	ARG																					FALSE	FALSE	FALSE	FALSE	FALSE	FALSE	FALSE	FALSE	FALSE	FALSE	FALSE	FALSE	FALSE	FALSE	TRUE	TRUE	TRUE	TRUE	TRUE	TRUE	TRUE	TRUE	TRUE	TRUE	TRUE	TRUE	TRUE
YPF Luz9	Cumulative overshoot	ARG
YPF Luz10	CBD Cumulative emissions	ARG																					2.73804e+06	5.13616e+06	8.31236e+06	1.13456e+07	1.47938e+07	1.8699e+07	2.22331e+07	2.56965e+07	2.88419e+07	3.18989e+07	3.48852e+07	3.76241e+07	4.03631e+07	4.27839e+07	4.50634e+07	4.71309e+07	4.91453e+07	5.09124e+07	5.27501e+07	5.45878e+07	5.62489e+07	5.79099e+07	5.95709e+07	6.1232e+07	6.2893e+07	6.4554e+07	6.62151e+07
Albanesi	emissions in tCO2e (scope 1)	ARG	2024 Sustainability Report; https://www.albanesi.com.ar/pdf/sustentabilidad_reportes/AlbanesiSustainabilityReport2024.pdf	No target																			1.30213e+06	1.35599e+06	1409843	1244068	1190119	2712235	2.77336e+06	2.83448e+06	2.88032e+06	2.94144e+06	3.00256e+06	3.06368e+06	3.14772e+06	3.23176e+06	3.29288e+06	3.38456e+06	3.47624e+06	3.56029e+06	3.63669e+06	3.75129e+06	3.83533e+06	3.96521e+06	4.04161e+06	4.12565e+06	4.21733e+06	4.30902e+06	4.4007e+06
Albanesi1	output	ARG	2024 Sustainability Report; https://www.albanesi.com.ar/pdf/sustentabilidad_reportes/AlbanesiSustainabilityReport2024.pdf	Output and emissionsin 2024																			2.48204e+06	2.5847e+06	2687360	2379360	2343012	4020573	4.11118e+06	4.20178e+06	4.26974e+06	4.36034e+06	4.45094e+06	4.54155e+06	4.66613e+06	4.79071e+06	4.88132e+06	5.01722e+06	5.15313e+06	5.27771e+06	5.39097e+06	5.56085e+06	5.68543e+06	5.87796e+06	5.99122e+06	6.1158e+06	6.25171e+06	6.38761e+06	6.52352e+06
Albanesi2	intensity	ARG	2023 Sustainability Report; https://www.albanesi.com.ar/pdf/sustentabilidad_reportes/AlbanesiSustainabilityReport2023.pdf	Output and emissionsin 2023													TRUE						0.52462	0.52462	0.52462	0.522858	0.507944	0.674589	0.674589	0.674589	0.674589	0.674589	0.674589	0.674589	0.674589	0.674589	0.674589	0.674589	0.674589	0.674589	0.674589	0.674589	0.674589	0.674589	0.674589	0.674589	0.674589	0.674589	0.674589
Albanesi3	cumulative emissions	ARG	2022 Sustainability Report; https://www.albanesi.com.ar/pdf/sustentabilidad_reportes/AlbanesiSustainabilityReport2022.pdf	Output and emissionsin 2022																			1.30213e+06	2.65811e+06	4.06796e+06	5.31203e+06	6.50214e+06	9.21438e+06	1.19877e+07	1.48222e+07	1.77025e+07	2.0644e+07	2.36465e+07	2.67102e+07	2.98579e+07	3.30897e+07	3.63826e+07	3.97671e+07	4.32434e+07	4.68037e+07	5.04404e+07	5.41916e+07	5.8027e+07	6.19922e+07	6.60338e+07	7.01594e+07	7.43768e+07	7.86858e+07	8.30865e+07
Albanesi4	SDA intensity	ARG	2021 Sustainability Report; https://www.albanesi.com.ar/pdf/sustentabilidad_reportes/AlbanesiSustainabilityReport2021.pdf	Output and emissionsin 2021				0.460547															0.52462	0.518306	0.544753	0.557951	0.505532	0.317261	0.279292	0.267269	0.237479	0.225384	0.215132	0.192059	0.186584	0.158818	0.145782	0.12711	0.119917	0.100841	0.102908	0.0993666	0.0863362	0.0830823	0.081266	0.0793457	0.0773381	0.0754159	0.0735739
Albanesi5	SDA cumulative emissions	ARG		No data for 2019 and 2020 so the intensity in 2021 was used as a proxy for the intensity in 2019 and 2020 and the yearly growth rate of electricity generation in the 1.5 Climate Analytics Argentina scenario was used to estimate the output.																			1.30213e+06	2.64179e+06	4.10574e+06	5.43331e+06	6.61777e+06	7.89334e+06	9.04156e+06	1.01646e+07	1.11785e+07	1.21613e+07	1.31188e+07	1.39911e+07	1.48617e+07	1.56226e+07	1.63342e+07	1.69719e+07	1.75898e+07	1.81221e+07	1.86768e+07	1.92294e+07	1.97203e+07	2.02086e+07	2.06955e+07	2.11808e+07	2.16642e+07	2.2146e+07	2.26259e+07
Albanesi6	marketshare	ARG																					0.0191348	0.0192223	0.0188752	0.0175761	0.0172118	0.0291193	0.0291193	0.0291193	0.0291193	0.0291193	0.0291193	0.0291193	0.0291193	0.0291193	0.0291193	0.0291193	0.0291193	0.0291193	0.0291193	0.0291193	0.0291193	0.0291193	0.0291193	0.0291193	0.0291193	0.0291193	0.0291193
Albanesi7	my	ARG																					1	0.99545	1.01375	1.08868	1.11172	0.657119	0.657119	0.657119	0.657119	0.657119	0.657119	0.657119	0.657119	0.657119	0.657119	0.657119	0.657119	0.657119	0.657119	0.657119	0.657119	0.657119	0.657119	0.657119	0.657119	0.657119	0.657119
Albanesi8	consumes total budget Y/N?	ARG																					FALSE	FALSE	FALSE	FALSE	FALSE	FALSE	FALSE	FALSE	FALSE	FALSE	FALSE	TRUE	TRUE	TRUE	TRUE	TRUE	TRUE	TRUE	TRUE	TRUE	TRUE	TRUE	TRUE	TRUE	TRUE	TRUE	TRUE
Albanesi9	Cumulative overshoot	ARG
Albanesi10	CBD Cumulative emissions	ARG																					783458	1.59334e+06	2.46158e+06	3.20366e+06	3.86202e+06	4.96586e+06	5.9648e+06	6.94377e+06	7.83283e+06	8.69692e+06	9.54103e+06	1.03152e+07	1.10894e+07	1.17737e+07	1.2418e+07	1.30024e+07	1.35718e+07	1.40712e+07	1.45907e+07	1.51102e+07	1.55797e+07	1.60492e+07	1.65187e+07	1.69882e+07	1.74577e+07	1.79272e+07	1.83967e+07
EPEC	emissions in tCO2e (scope 1)	ARG	2023 Sustainability Report; https://www.epec.com.ar/docs/transparencia/reporte-sustentabilidad-2023.pdf?utm_source=chatgpt.com	No target																			995733	1.03692e+06	1.0781e+06	1129547	1.00425e+06	1186408	1.21314e+06	1.23988e+06	1.25993e+06	1.28667e+06	1.3134e+06	1.34014e+06	1.3769e+06	1.41366e+06	1.4404e+06	1.4805e+06	1.52061e+06	1.55737e+06	1.59079e+06	1.64092e+06	1.67768e+06	1.7345e+06	1.76792e+06	1.80468e+06	1.84478e+06	1.88488e+06	1.92499e+06
EPEC1	output	ARG	Reporte de la medición 2024; https://www.epec.com.ar/docs/transparencia/Huella-carbono-epec-2024.pdf	Emissions and intensity in 2021, 2022, 2023, and 2024																			2.76592e+06	2.88033e+06	2.99473e+06	2.82387e+06	2.71419e+06	3.12213e+06	3.19248e+06	3.26284e+06	3.31561e+06	3.38597e+06	3.45633e+06	3.52668e+06	3.62343e+06	3.72017e+06	3.79053e+06	3.89606e+06	4.0016e+06	4.09834e+06	4.18629e+06	4.31821e+06	4.41495e+06	4.56446e+06	4.65241e+06	4.74915e+06	4.85469e+06	4.96022e+06	5.06576e+06
EPEC2	intensity	ARG		No data for 2019 and 2020 so the intensity in 2021 was used as a proxy for the intensity in 2019 and 2020 and the yearly growth rate of electricity generation in the 1.5 Climate Analytics Argentina scenario was used to estimate the output.													TRUE						0.36	0.36	0.36	0.4	0.37	0.38	0.38	0.38	0.38	0.38	0.38	0.38	0.38	0.38	0.38	0.38	0.38	0.38	0.38	0.38	0.38	0.38	0.38	0.38	0.38	0.38	0.38
EPEC3	cumulative emissions	ARG																					995733	2.03265e+06	3.11075e+06	4.2403e+06	5.24455e+06	6.43096e+06	7.6441e+06	8.88398e+06	1.01439e+07	1.14306e+07	1.2744e+07	1.40841e+07	1.5461e+07	1.68747e+07	1.83151e+07	1.97956e+07	2.13162e+07	2.28736e+07	2.44644e+07	2.61053e+07	2.7783e+07	2.95175e+07	3.12854e+07	3.309e+07	3.49348e+07	3.68197e+07	3.87447e+07
EPEC4	SDA intensity	ARG						0.295927															0.36	0.355943	0.372936	0.362046	0.33695	0.297539	0.262527	0.251441	0.223971	0.212818	0.203365	0.182089	0.177041	0.151438	0.139417	0.1222	0.115567	0.0979771	0.0998825	0.0966173	0.084602	0.0816016	0.0799267	0.078156	0.0763048	0.0745324	0.0728338
EPEC5	SDA cumulative emissions	ARG																					995733	2.02096e+06	3.13781e+06	4.16018e+06	5.07472e+06	6.00367e+06	6.84179e+06	7.6622e+06	8.4048e+06	9.12539e+06	9.82829e+06	1.04705e+07	1.1112e+07	1.16753e+07	1.22038e+07	1.26799e+07	1.31423e+07	1.35439e+07	1.3962e+07	1.43792e+07	1.47527e+07	1.51252e+07	1.54971e+07	1.58682e+07	1.62387e+07	1.66084e+07	1.69773e+07
EPEC6	marketshare	ARG																					0.0213234	0.0214208	0.0210341	0.0208596	0.0199385	0.0226122	0.0226122	0.0226122	0.0226122	0.0226122	0.0226122	0.0226122	0.0226122	0.0226122	0.0226122	0.0226122	0.0226122	0.0226122	0.0226122	0.0226122	0.0226122	0.0226122	0.0226122	0.0226122	0.0226122	0.0226122	0.0226122
EPEC7	my	ARG																					1	0.99545	1.01375	1.02223	1.06946	0.943002	0.943002	0.943002	0.943002	0.943002	0.943002	0.943002	0.943002	0.943002	0.943002	0.943002	0.943002	0.943002	0.943002	0.943002	0.943002	0.943002	0.943002	0.943002	0.943002	0.943002	0.943002
EPEC8	consumes total budget Y/N?	ARG																					FALSE	FALSE	FALSE	FALSE	FALSE	FALSE	FALSE	FALSE	FALSE	FALSE	FALSE	FALSE	FALSE	FALSE	FALSE	TRUE	TRUE	TRUE	TRUE	TRUE	TRUE	TRUE	TRUE	TRUE	TRUE	TRUE	TRUE
EPEC9	Cumulative overshoot	ARG
EPEC10	CBD Cumulative emissions	ARG																					873066	1.77557e+06	2.74313e+06	3.62384e+06	4.38649e+06	5.24366e+06	6.01938e+06	6.77959e+06	7.46998e+06	8.14097e+06	8.79646e+06	9.39764e+06	9.99882e+06	1.05302e+07	1.10305e+07	1.14843e+07	1.19265e+07	1.23143e+07	1.27177e+07	1.31211e+07	1.34857e+07	1.38503e+07	1.42149e+07	1.45794e+07	1.4944e+07	1.53086e+07	1.56732e+07
Enel Argentina	emissions in tCO2e (scope 1)	ARG	Informe de Sustainabilidad 2024; https://www.enel.com.ar/content/dam/enel-ar/Suplemento%20ASG%20ENEL%20ARGENTINA%202024.pdf	Group target applied to Enel's activity in electricity generation in Argentina.	2040	Zero emissions by 2040																	2.62173e+06	4.64283e+06	4.66307e+06	4.15911e+06	0.007	3.27	3.21509	3.1545	3.07196	3.00075	2.92387	2.84132	2.7733	2.69748	2.59581	2.51113	2.41796	2.31132	2.19228	2.08741	1.95633	1.83871	1.68672	1.53049	1.36894	1.19888	1.02033
Enel Argentina1	output	ARG	Informe de Sustainabilidad 2024; https://www.enel.com.ar/es/sobre-enel/suplemento-ASG-2024.html	Output and emissions in 2024																			12976000	13900690	13098510	11120620	2749970	2990000	3.05738e+06	3.12476e+06	3.1753e+06	3.24268e+06	3.31006e+06	3.37744e+06	3.47008e+06	3.56273e+06	3.63011e+06	3.73118e+06	3.83225e+06	3.9249e+06	4.00913e+06	4.13546e+06	4.22811e+06	4.3713e+06	4.45552e+06	4.54817e+06	4.64924e+06	4.75031e+06	4.85138e+06
Enel Argentina2	intensity	ARG	Informe de Sustainabilidad 2022; https://www.enel.com.ar/content/dam/enel-ar/REPORTE%20SOSTENIBILIDAD%20ENEL%20ARGENTINA%202022.pdf	Output and emissions in 2020, 2021, 2022													TRUE						0.202045	0.334	0.356	0.374	2.54548e-09	1.09365e-06	1.05158e-06	1.00952e-06	9.67456e-07	9.25392e-07	8.83329e-07	8.41266e-07	7.99202e-07	7.57139e-07	7.15076e-07	6.73013e-07	6.30949e-07	5.88886e-07	5.46823e-07	5.04759e-07	4.62696e-07	4.20633e-07	3.7857e-07	3.36506e-07	2.94443e-07	2.5238e-07	2.10316e-07
Enel Argentina3	cumulative emissions	ARG	Informe de Sustainabilidad 2023; https://www.enel.com.ar/content/dam/enel-ar/ENEL_Informe%20de%20Sostenibilidad_2023_%20VF.pdf	Output and emissions in 2023																			2.62173e+06	7.26456e+06	1.19276e+07	1.60867e+07	1.60867e+07	1.60867e+07	1.60868e+07	1.60868e+07	1.60868e+07	1.60868e+07	1.60868e+07	1.60868e+07	1.60868e+07	1.60868e+07	1.60868e+07	1.60868e+07	1.60868e+07	1.60868e+07	1.60868e+07	1.60868e+07	1.60868e+07	1.60868e+07	1.60868e+07	1.60868e+07	1.60868e+07	1.60868e+07	1.60868e+07
Enel Argentina4	SDA intensity	ARG						0.137972															0.202045	0.196355	0.21853	0.229573	0.653167	0.597295	0.51733	0.49201	0.429271	0.403799	0.382207	0.333615	0.322084	0.26361	0.236155	0.196831	0.181682	0.141508	0.14586	0.138402	0.11096	0.104107	0.100282	0.0962376	0.0920095	0.0879614	0.084082
Enel Argentina5	SDA cumulative emissions	ARG																					2.62173e+06	5.3512e+06	8.21362e+06	1.07666e+07	1.25628e+07	1.43487e+07	1.59304e+07	1.74678e+07	1.88309e+07	2.01403e+07	2.14054e+07	2.25321e+07	2.36498e+07	2.4589e+07	2.54462e+07	2.61807e+07	2.68769e+07	2.74323e+07	2.80171e+07	2.85894e+07	2.90586e+07	2.95137e+07	2.99605e+07	3.03982e+07	3.0826e+07	3.12438e+07	3.16517e+07
Enel Argentina6	marketshare	ARG																					0.100036	0.103379	0.092	0.0821468	0.0202014	0.0216553	0.0216553	0.0216553	0.0216553	0.0216553	0.0216553	0.0216553	0.0216553	0.0216553	0.0216553	0.0216553	0.0216553	0.0216553	0.0216553	0.0216553	0.0216553	0.0216553	0.0216553	0.0216553	0.0216553	0.0216553	0.0216553
Enel Argentina7	my	ARG																					1	0.967666	1.08735	1.21777	4.95194	4.61947	4.61947	4.61947	4.61947	4.61947	4.61947	4.61947	4.61947	4.61947	4.61947	4.61947	4.61947	4.61947	4.61947	4.61947	4.61947	4.61947	4.61947	4.61947	4.61947	4.61947	4.61947
Enel Argentina8	consumes total budget Y/N?	ARG																					FALSE	FALSE	FALSE	FALSE	FALSE	FALSE	FALSE	FALSE	FALSE	FALSE	FALSE	FALSE	FALSE	FALSE	FALSE	FALSE	FALSE	FALSE	FALSE	FALSE	FALSE	FALSE	FALSE	FALSE	FALSE	FALSE	FALSE
Enel Argentina9	Cumulative overshoot	ARG
Enel Argentina10	CBD Cumulative emissions	ARG																					4.09588e+06	8.45146e+06	1.26834e+07	1.61517e+07	1.69244e+07	1.77453e+07	1.84882e+07	1.92162e+07	1.98774e+07	2.052e+07	2.11478e+07	2.17235e+07	2.22992e+07	2.28081e+07	2.32873e+07	2.37219e+07	2.41453e+07	2.45168e+07	2.49031e+07	2.52894e+07	2.56385e+07	2.59877e+07	2.63369e+07	2.6686e+07	2.70352e+07	2.73843e+07	2.77335e+07
ENARSA	State-owned company with 8% of the electricity generation but no reporting.
CAPEX S.A.	Vertically integrated energy company with no reporting.
MSU Energy	Energy company in Argentina with 3 thermal plants. No reporting.
SCC Power	Energy company in Argentine with four thermal plants. No reporting.
Argentine companies	emissions in tCO2e (scope 1)	ARG																					2.34616e+07	2.57188e+07	2.94835e+07	2.85967e+07	2.54417e+07	2.79547e+07	2.83723e+07	2.87806e+07	2.90255e+07	2.94162e+07	2.97975e+07	3.01695e+07	3.06183e+07	3.10468e+07	3.12377e+07	3.17e+07	3.21404e+07	3.24889e+07	3.27484e+07	3.33289e+07	3.3614e+07	3.4275e+07	3.4596e+07	3.4969e+07	3.53919e+07	3.57994e+07	3.61916e+07
Argentine companies1	output	ARG																					6.91085e+07	6.96818e+07	7.54056e+07	7.35972e+07	6.82294e+07	7.31954e+07	7.48448e+07	7.64943e+07	7.77314e+07	7.93809e+07	8.10304e+07	8.26798e+07	8.49479e+07	8.72159e+07	8.88654e+07	9.13396e+07	9.38138e+07	9.60818e+07	9.81437e+07	1.01236e+08	1.03504e+08	1.0701e+08	1.09071e+08	1.11339e+08	1.13814e+08	1.16288e+08	1.18762e+08
Argentine companies2	intensity	ARG															TRUE						0.339489	0.36909	0.390999	0.388557	0.372885	0.381919	0.379082	0.376245	0.373407	0.37057	0.367733	0.364896	0.360436	0.355976	0.351517	0.347057	0.342597	0.338138	0.333678	0.329218	0.324759	0.320299	0.317187	0.314075	0.310964	0.307852	0.30474
Argentine companies3	cumulative emissions	ARG																					2.34616e+07	4.91804e+07	7.86639e+07	1.07261e+08	1.32702e+08	1.60657e+08	1.89029e+08	2.1781e+08	2.46835e+08	2.76252e+08	3.06049e+08	3.36219e+08	3.66837e+08	3.97884e+08	4.29121e+08	4.60821e+08	4.92962e+08	5.25451e+08	5.58199e+08	5.91528e+08	6.25142e+08	6.59417e+08	6.94013e+08	7.28982e+08	7.64374e+08	8.00173e+08	8.36365e+08
Argentine companies4	SDA intensity	ARG						0.275416															0.339489	0.344621	0.349317	0.329935	0.316497	0.295645	0.260917	0.249921	0.222674	0.211612	0.202235	0.181132	0.176124	0.150729	0.138806	0.121728	0.115149	0.0977021	0.0995921	0.0963533	0.0844355	0.0814594	0.0797981	0.0780418	0.0762056	0.0744475	0.0727627
Argentine companies5	SDA cumulative emissions	ARG																					2.34616e+07	4.74754e+07	7.38159e+07	9.80981e+07	1.19693e+08	1.41332e+08	1.60861e+08	1.79978e+08	1.97287e+08	2.14085e+08	2.30472e+08	2.45448e+08	2.60409e+08	2.73555e+08	2.8589e+08	2.97009e+08	3.07812e+08	3.17199e+08	3.26973e+08	3.36728e+08	3.45467e+08	3.54184e+08	3.62888e+08	3.71577e+08	3.8025e+08	3.88908e+08	3.97549e+08
Argentine companies6	marketshare	ARG																					0.532779	0.518219	0.529626	0.543654	0.501216	0.530122	0.530122	0.530122	0.530122	0.530122	0.530122	0.530122	0.530122	0.530122	0.530122	0.530122	0.530122	0.530122	0.530122	0.530122	0.530122	0.530122	0.530122	0.530122	0.530122	0.530122	0.530122
Argentine companies7	my	ARG																					1	1.02809	1.00595	0.979995	1.06297	1.00501	1.00501	1.00501	1.00501	1.00501	1.00501	1.00501	1.00501	1.00501	1.00501	1.00501	1.00501	1.00501	1.00501	1.00501	1.00501	1.00501	1.00501	1.00501	1.00501	1.00501	1.00501
Argentine companies8	consumes total budget Y/N?	ARG																					FALSE	FALSE	FALSE	FALSE	FALSE	FALSE	FALSE	FALSE	FALSE	FALSE	FALSE	FALSE	FALSE	FALSE	FALSE	TRUE	TRUE	TRUE	TRUE	TRUE	TRUE	TRUE	TRUE	TRUE	TRUE	TRUE	TRUE
Argentine companies9	Cumulative overshoot	ARG
Argentine companies10	CBD Cumulative emissions	ARG																					2.18142e+07	4.36479e+07	6.80104e+07	9.0964e+07	1.10136e+08	1.30231e+08	1.48417e+08	1.6624e+08	1.82425e+08	1.98156e+08	2.13523e+08	2.27617e+08	2.41712e+08	2.54169e+08	2.65899e+08	2.76538e+08	2.86904e+08	2.95997e+08	3.05454e+08	3.1491e+08	3.23458e+08	3.32005e+08	3.40553e+08	3.491e+08	3.57647e+08	3.66195e+08	3.74742e+08
JERA	emissions in tCO2e (scope 1)	JPN	https://www.jera.co.jp/static/files/en/ir/library/pdf/20220512_e1.pdf		2030;2035;2050	20% intensity reduction by 2030 compared with 2019; 60% emissions reduction by 2035 compared with 2013; net zero by 2050											180000000								118694000	121098000	114952000	1.12371e+08	1.09739e+08	1.07058e+08	1.04325e+08	1.01542e+08	9.87093e+07	9.58257e+07	9.10606e+07	8.62954e+07	8.15303e+07	7.67651e+07	72000000	67200000	62400000	57600000	52800000	48000000
JERA1	output	JPN	https://www.jera.co.jp/en/sustainability/data/e	Output and emissions in 2020, 2021, 2022, and 2023																					247000000	235000000	231000000	2.32709e+08	2.34419e+08	2.36128e+08	2.37838e+08	2.39547e+08	2.41256e+08	2.42966e+08	2.44675e+08	2.46385e+08	2.48094e+08	2.49803e+08	2.51513e+08	2.53222e+08	2.54931e+08	2.56641e+08	2.5835e+08	2.6006e+08
JERA2	intensity	JPN	CDP Climate Change Questionnaire 2023	Baseline year for the intensity target is 2019, value in the base year is 0.493													TRUE								0.480543	0.515311	0.497628	0.482881	0.468134	0.453387	0.43864	0.423894	0.409147	0.3944	0.372169	0.350247	0.328627	0.307302	0.286268	0.26538	0.244772	0.224438	0.204374	0.184573
JERA3	cumulative emissions	JPN																							118694000	239792000	354744000	4.67115e+08	5.76854e+08	6.83912e+08	7.88237e+08	8.89779e+08	9.88489e+08	1.08431e+09	1.17537e+09	1.26167e+09	1.3432e+09	1.41997e+09	1.49197e+09	1.55917e+09	1.62157e+09	1.67917e+09	1.73197e+09	1.77997e+09
JERA4	SDA intensity	JPN						0.432665																	0.480543	0.510292	0.480484	0.455037	0.429589	0.404142	0.378694	0.353247	0.3278	0.302352	0.276905	0.251457	0.22601	0.200562	0.175115	0.149667	0.12422	0.0987726	0.0733251	0.0478777
JERA5	SDA cumulative emissions	JPN																							118694000	2.38613e+08	3.49604e+08	4.55496e+08	5.562e+08	6.51629e+08	7.41697e+08	8.26316e+08	9.054e+08	9.78861e+08	1.04661e+09	1.10857e+09	1.16464e+09	1.21474e+09	1.25878e+09	1.29668e+09	1.32835e+09	1.3537e+09	1.37264e+09	1.38509e+09
JERA6	marketshare	JPN																							0.244891	0.231672	0.233867	0.233867	0.233867	0.233867	0.233867	0.233867	0.233867	0.233867	0.233867	0.233867	0.233867	0.233867	0.233867	0.233867	0.233867	0.233867	0.233867	0.233867
JERA7	my	JPN																							1	1.05706	1.04714	1.04714	1.04714	1.04714	1.04714	1.04714	1.04714	1.04714	1.04714	1.04714	1.04714	1.04714	1.04714	1.04714	1.04714	1.04714	1.04714	1.04714
JERA8	consumes total budget Y/N?	JPN																							FALSE	FALSE	FALSE	FALSE	FALSE	FALSE	FALSE	FALSE	FALSE	FALSE	FALSE	FALSE	FALSE	TRUE	TRUE	TRUE	TRUE	TRUE	TRUE	TRUE
JERA9	Cumulative overshoot	JPN
JERA10	CBD Cumulative emissions	JPN																							1.18433e+08	2.32234e+08	3.38494e+08	4.39899e+08	5.36366e+08	6.27812e+08	7.14154e+08	7.9531e+08	8.71196e+08	9.41729e+08	1.00683e+09	1.06641e+09	1.12039e+09	1.16868e+09	1.21121e+09	1.24789e+09	1.27864e+09	1.30337e+09	1.322e+09	1.33445e+09
Kansai Electric Power Group	emissions in tCO2e (scope 1)	JPN		group-wide scope1&2 targets are applied to scope 1 emissions from electricity generation		Reduction in scope 1&2 intensity of 55% by 2025 and 70% by 2030 compared with 2013; zero carbon by 2050																			25400000	24700000	21200000	2.00198e+07	1.882e+07	1.76934e+07	1.65485e+07	1.53853e+07	1.42039e+07	1.30041e+07	1.24408e+07	1.18684e+07	1.12868e+07	1.0696e+07	1.00962e+07	9.48713e+06	8.86895e+06	8.24161e+06	7.60513e+06	6.9595e+06
Kansai Electric Power Group1	output	JPN	ESG Report 2024; https://www.kepco.co.jp/english/corporate/list/esg/pdf/esg2024_e.pdf	Emissions, Output, and intensity for 2013 to 2023																					95600000	87300000	96700000	9.74156e+07	9.81312e+07	9.88467e+07	9.95623e+07	1.00278e+08	1.00993e+08	1.01709e+08	1.02425e+08	1.0314e+08	1.03856e+08	1.04571e+08	1.05287e+08	1.06002e+08	1.06718e+08	1.07434e+08	1.08149e+08	1.08865e+08
Kansai Electric Power Group2	intensity	JPN													TRUE										0.26569	0.282932	0.219235	0.205509	0.191784	0.178998	0.166213	0.153427	0.140641	0.127856	0.121463	0.11507	0.108678	0.102285	0.0958919	0.0894991	0.0831063	0.0767135	0.0703207	0.0639279
Kansai Electric Power Group3	cumulative emissions	JPN																							25400000	50100000	71300000	9.13198e+07	1.1014e+08	1.27833e+08	1.44382e+08	1.59767e+08	1.73971e+08	1.86975e+08	1.99416e+08	2.11284e+08	2.22571e+08	2.33267e+08	2.43363e+08	2.5285e+08	2.61719e+08	2.69961e+08	2.77566e+08	2.84525e+08
Kansai Electric Power Group4	SDA intensity	JPN						0.217813																	0.26569	0.290414	0.249237	0.237392	0.225547	0.213703	0.201858	0.190013	0.178169	0.166324	0.15448	0.142635	0.13079	0.118946	0.107101	0.0952563	0.0834116	0.071567	0.0597223	0.0478777
Kansai Electric Power Group5	SDA cumulative emissions	JPN																							25400000	5.07532e+07	7.48544e+07	9.798e+07	1.20113e+08	1.41237e+08	1.61335e+08	1.80389e+08	1.98383e+08	2.15299e+08	2.31122e+08	2.45833e+08	2.59416e+08	2.71855e+08	2.83131e+08	2.93228e+08	3.0213e+08	3.09819e+08	3.16278e+08	3.2149e+08
Kansai Electric Power Group6	marketshare	JPN																							0.0947836	0.0860637	0.0979	0.0979	0.0979	0.0979	0.0979	0.0979	0.0979	0.0979	0.0979	0.0979	0.0979	0.0979	0.0979	0.0979	0.0979	0.0979	0.0979	0.0979
Kansai Electric Power Group7	my	JPN																							1	1.10132	0.968167	0.968167	0.968167	0.968167	0.968167	0.968167	0.968167	0.968167	0.968167	0.968167	0.968167	0.968167	0.968167	0.968167	0.968167	0.968167	0.968167	0.968167
Kansai Electric Power Group8	consumes total budget Y/N?	JPN																							FALSE	FALSE	FALSE	FALSE	FALSE	FALSE	FALSE	FALSE	FALSE	FALSE	FALSE	FALSE	FALSE	FALSE	FALSE	FALSE	FALSE	FALSE	FALSE	FALSE
Kansai Electric Power Group9	Cumulative overshoot	JPN
Kansai Electric Power Group10	CBD Cumulative emissions	JPN																							4.58388e+07	8.81149e+07	1.32597e+08	1.75046e+08	2.15429e+08	2.5371e+08	2.89854e+08	3.23827e+08	3.55594e+08	3.8512e+08	4.12371e+08	4.37312e+08	4.59909e+08	4.80126e+08	4.97929e+08	5.13283e+08	5.26154e+08	5.36506e+08	5.44306e+08	5.49518e+08
Tohoku	emissions in tCO2e (scope 1)	JPN	Sustainability Report 2024; https://www.tohoku-epco.co.jp/ir/report/integrated_report/pdf/tohoku_sustainability2024en.pdf#page=9	The interim target is applied to scope 1 emissions from electricity generations		halving CO2 emissions vs. FY2013 by 2030, net zero by 2050											50450000	43740000	41770000	40340000	37340000	35820000	34710000	30120000	32815000	31069000	33760000	3.25407e+07	3.13214e+07	3.01021e+07	2.88829e+07	2.76636e+07	2.64443e+07	25225000	23963750	22702500	21441250	20180000	18918750	17657500	16396250	15135000	13873750	12612500
Tohoku1	output	JPN	Sustainability Report 2024; https://www.tohoku-epco.co.jp/ir/report/integrated_report/pdf/tohoku_sustainability2024en.pdf#page=9	Output and emissions in 2021, 2022, 2023																					60500000	57900000	57700000	5.8127e+07	5.8554e+07	5.89809e+07	5.94079e+07	5.98349e+07	6.02619e+07	6.06888e+07	6.11158e+07	6.15428e+07	6.19698e+07	6.23968e+07	6.28237e+07	6.32507e+07	6.36777e+07	6.41047e+07	6.45316e+07	6.49586e+07
Tohoku2	intensity	JPN	Sustainability Report 2023; https://www.tohoku-epco.co.jp/ir/report/integrated_report/pdf/tohoku_sustainability2023en.pdf	Emissions and intensity from 2013 to 2020. Reporting perimeter is inconsistent with the data used for 2021 to 2023 but within the same range.											TRUE										0.542397	0.536598	0.585095	0.559821	0.534916	0.510371	0.486179	0.462332	0.438823	0.415645	0.392104	0.36889	0.345995	0.323414	0.30114	0.279167	0.257488	0.236098	0.214991	0.194162
Tohoku3	cumulative emissions	JPN																							32815000	63884000	97644000	1.30185e+08	1.61506e+08	1.91608e+08	2.20491e+08	2.48155e+08	274599000	299824000	323787750	346490250	367931500	388111500	407030250	424687750	441084000	456219000	470092750	482705250
Tohoku4	SDA intensity	JPN						0.494519																	0.542397	0.573302	0.532741	0.504219	0.475698	0.447177	0.418655	0.390134	0.361613	0.333091	0.30457	0.276049	0.247527	0.219006	0.190484	0.161963	0.133442	0.10492	0.076399	0.0478777
Tohoku5	SDA cumulative emissions	JPN																							32815000	6.60092e+07	9.67483e+07	1.26057e+08	1.53911e+08	1.80286e+08	2.05157e+08	2.28501e+08	2.50292e+08	2.70507e+08	2.89121e+08	3.0611e+08	3.21449e+08	3.35115e+08	3.47082e+08	3.57326e+08	3.65823e+08	3.72549e+08	3.77479e+08	3.80589e+08
Tohoku6	marketshare	JPN																							0.0599833	0.0570801	0.058416	0.058416	0.058416	0.058416	0.058416	0.058416	0.058416	0.058416	0.058416	0.058416	0.058416	0.058416	0.058416	0.058416	0.058416	0.058416	0.058416	0.058416
Tohoku7	my	JPN																							1	1.05086	1.02683	1.02683	1.02683	1.02683	1.02683	1.02683	1.02683	1.02683	1.02683	1.02683	1.02683	1.02683	1.02683	1.02683	1.02683	1.02683	1.02683	1.02683
Tohoku8	consumes total budget Y/N?	JPN																							FALSE	FALSE	FALSE	FALSE	FALSE	FALSE	FALSE	FALSE	FALSE	FALSE	FALSE	FALSE	FALSE	TRUE	TRUE	TRUE	TRUE	TRUE	TRUE	TRUE
Tohoku9	Cumulative overshoot	JPN
Tohoku10	CBD Cumulative emissions	JPN																							2.90088e+07	5.70476e+07	8.35896e+07	1.08919e+08	1.33015e+08	1.55856e+08	1.77423e+08	1.97695e+08	2.1665e+08	2.34268e+08	2.50528e+08	2.6541e+08	2.78894e+08	2.90957e+08	3.0158e+08	3.10741e+08	3.18421e+08	3.24599e+08	3.29253e+08	3.32363e+08
JPower	emissions in tCO2e (scope 1)	JPN	Sustainability Report 2024; https://www.jpower.co.jp/english/ir/library/pdf/2024/jpower_integrated2024_e_all.pdf	The 2025 target is already met so it was assumed that CO2 emissions would remain stable from 2023 to 2025		FY2025: Reductions of 9.2 million tons of emissions from domestic power generation business;2030: Reductions of 46% (22.5 million tons) of emissions from domestic power generation business; net zero by 2050																			41620000	40640000	33680000	33680000	33680000	32204000	30728000	29252000	27776000	26300000	24985000	23670000	22355000	21040000	19725000	18410000	17095000	15780000	14465000	13150000
JPower1	output	JPN	Independent Assurance Report/ESG Data 2024; https://www.jpower.co.jp/english/ir/library/pdf/2024/jpower_integrated2024_e_109_113.pdf	Output and emissions in 2021, 2022, 2023																					62300000	59600000	52600000	5.29892e+07	5.33785e+07	5.37677e+07	5.4157e+07	5.45462e+07	5.49354e+07	5.53247e+07	5.57139e+07	5.61031e+07	5.64924e+07	5.68816e+07	5.72709e+07	5.76601e+07	5.80493e+07	5.84386e+07	5.88278e+07	5.9217e+07
JPower2	intensity	JPN		Could probably go back to 2013 in the data											TRUE										0.668058	0.681879	0.640304	0.635601	0.630966	0.598947	0.567388	0.536279	0.505612	0.475376	0.448452	0.421902	0.395717	0.369891	0.344416	0.319285	0.294491	0.270027	0.245887	0.222064
JPower3	cumulative emissions	JPN																							41620000	82260000	115940000	149620000	183300000	215504000	246232000	275484000	303260000	329560000	354545000	378215000	400570000	421610000	441335000	459745000	476840000	492620000	507085000	520235000
JPower4	SDA intensity	JPN						0.62018																	0.668058	0.707067	0.734751	0.694347	0.653942	0.613538	0.573134	0.532729	0.492325	0.451921	0.411516	0.371112	0.330708	0.290304	0.249899	0.209495	0.169091	0.128686	0.088282	0.0478777
JPower5	SDA cumulative emissions	JPN																							41620000	8.37612e+07	1.22409e+08	1.59202e+08	1.94108e+08	2.27097e+08	2.58136e+08	2.87195e+08	3.14241e+08	3.39243e+08	3.6217e+08	3.82991e+08	4.01673e+08	4.18186e+08	4.32498e+08	4.44578e+08	4.54393e+08	4.61913e+08	4.67107e+08	4.69942e+08
JPower6	marketshare	JPN																							0.061768	0.058756	0.0532527	0.0532527	0.0532527	0.0532527	0.0532527	0.0532527	0.0532527	0.0532527	0.0532527	0.0532527	0.0532527	0.0532527	0.0532527	0.0532527	0.0532527	0.0532527	0.0532527	0.0532527
JPower7	my	JPN																							1	1.05126	1.1599	1.1599	1.1599	1.1599	1.1599	1.1599	1.1599	1.1599	1.1599	1.1599	1.1599	1.1599	1.1599	1.1599	1.1599	1.1599	1.1599	1.1599
JPower8	consumes total budget Y/N?	JPN																							FALSE	FALSE	FALSE	FALSE	FALSE	FALSE	FALSE	FALSE	FALSE	FALSE	FALSE	FALSE	FALSE	FALSE	FALSE	FALSE	TRUE	TRUE	TRUE	TRUE
JPower9	Cumulative overshoot	JPN																									0.421069	0.430091	0.439182	0.419949	0.401175	0.382852	0.36497	0.34752	0.326989	0.306831	0.28704	0.267606	0.248524	0.229786	0.211385	0.193314	0.175566	0.158136
JPower10	CBD Cumulative emissions	JPN																							2.98719e+07	5.8734e+07	8.293e+07	1.0602e+08	1.27986e+08	1.48809e+08	1.6847e+08	1.86949e+08	2.04229e+08	2.2029e+08	2.35113e+08	2.4868e+08	2.60971e+08	2.71968e+08	2.81652e+08	2.90004e+08	2.97005e+08	3.02637e+08	3.06879e+08	3.09714e+08
Chugoku Electric Power Group	emissions in tCO2e (scope 1)	JPN	Sustainability Report 2024; https://www.energia.co.jp/e/ir/report/pdf/integrated-01.pdf	"emissions" is used as a proxy for scope 1 emissions from electricity generation		halve emissions from power generation by 2031 compared with 2014; net zero by 2050																			24150000	25270000	24660000	22770000	2.24983e+07	2.22267e+07	2.1955e+07	2.16833e+07	2.14117e+07	21140000	20083000	19026000	17969000	16912000	15855000	14798000	13741000	12684000	11627000	10570000
Chugoku Electric Power Group1	output	JPN	Sustainability Report 2024; https://www.energia.co.jp/e/ir/report/pdf/integrated-01.pdf	Output and inteisty in 2021, 2022, 2023, and 2024																					4.63532e+07	4.71455e+07	4.53309e+07	4.45597e+07	4.4887e+07	4.52143e+07	4.55416e+07	4.5869e+07	4.61963e+07	4.65236e+07	4.68509e+07	4.71782e+07	4.75055e+07	4.78329e+07	4.81602e+07	4.84875e+07	4.88148e+07	4.91421e+07	4.94695e+07	4.97968e+07
Chugoku Electric Power Group2	intensity	JPN													TRUE										0.521	0.536	0.544	0.511	0.501222	0.491585	0.482086	0.472723	0.463493	0.454393	0.428658	0.403279	0.378251	0.353564	0.329214	0.305192	0.281492	0.258108	0.235034	0.212263
Chugoku Electric Power Group3	cumulative emissions	JPN																							24150000	49420000	74080000	96850000	1.19348e+08	141575000	163530000	1.85213e+08	2.06625e+08	2.27765e+08	2.47848e+08	2.66874e+08	284843000	301755000	317610000	332408000	346149000	358833000	370460000	381030000
Chugoku Electric Power Group4	SDA intensity	JPN						0.473122																	0.521	0.52088	0.50027	0.484233	0.456961	0.429689	0.402416	0.375144	0.347872	0.3206	0.293328	0.266055	0.238783	0.211511	0.184239	0.156967	0.129694	0.102422	0.0751499	0.0478777
Chugoku Electric Power Group5	SDA cumulative emissions	JPN																							24150000	4.87071e+07	7.13848e+07	9.29621e+07	1.13474e+08	1.32902e+08	1.51228e+08	1.68436e+08	1.84506e+08	1.99422e+08	2.13164e+08	2.25716e+08	2.3706e+08	2.47177e+08	2.5605e+08	2.63661e+08	2.69992e+08	2.75025e+08	2.78743e+08	2.81127e+08
Chugoku Electric Power Group6	marketshare	JPN																							0.0459573	0.0464779	0.0458934	0.0447813	0.0447813	0.0447813	0.0447813	0.0447813	0.0447813	0.0447813	0.0447813	0.0447813	0.0447813	0.0447813	0.0447813	0.0447813	0.0447813	0.0447813	0.0447813	0.0447813
Chugoku Electric Power Group7	my	JPN																							1	0.9888	1.00139	1.02626	1.02626	1.02626	1.02626	1.02626	1.02626	1.02626	1.02626	1.02626	1.02626	1.02626	1.02626	1.02626	1.02626	1.02626	1.02626	1.02626
Chugoku Electric Power Group8	consumes total budget Y/N?	JPN																							FALSE	FALSE	FALSE	FALSE	FALSE	FALSE	FALSE	FALSE	FALSE	FALSE	FALSE	FALSE	TRUE	TRUE	TRUE	TRUE	TRUE	TRUE	TRUE	TRUE
Chugoku Electric Power Group9	Cumulative overshoot	JPN
Chugoku Electric Power Group10	CBD Cumulative emissions	JPN																							2.22256e+07	4.50565e+07	6.59087e+07	8.53259e+07	1.03798e+08	1.21308e+08	1.37841e+08	1.53381e+08	1.67911e+08	1.81417e+08	1.93883e+08	2.05291e+08	2.15627e+08	2.24875e+08	2.33018e+08	2.40041e+08	2.45929e+08	2.50664e+08	2.54232e+08	2.56616e+08
Hokuriku Electric Power Group	emissions in tCO2e (scope 1)	JPN			2050	Carbon neutrality by 2050																			18760000	17480000	13150000	1.27567e+07	1.23561e+07	1.19484e+07	1.15334e+07	1.11113e+07	1.06819e+07	1.02453e+07	9.80152e+06	9.35052e+06	8.89232e+06	8.42691e+06	7.95429e+06	7.47446e+06	6.98742e+06	6.49317e+06	5.99172e+06	5.48306e+06
Hokuriku Electric Power Group1	output	JPN																							3.1105e+07	29105000	23904000	2.40809e+07	2.42578e+07	2.44347e+07	2.46116e+07	2.47884e+07	2.49653e+07	2.51422e+07	2.53191e+07	2.5496e+07	2.56729e+07	2.58498e+07	2.60267e+07	2.62036e+07	2.63804e+07	2.65573e+07	2.67342e+07	2.69111e+07
Hokuriku Electric Power Group2	intensity	JPN													TRUE										0.603118	0.600584	0.550117	0.529742	0.509368	0.488993	0.468618	0.448244	0.427869	0.407494	0.387119	0.366745	0.34637	0.325995	0.305621	0.285246	0.264871	0.244497	0.224122	0.203747
Hokuriku Electric Power Group3	cumulative emissions	JPN																							18760000	36240000	49390000	6.21467e+07	7.45028e+07	8.64512e+07	9.79846e+07	1.09096e+08	1.19778e+08	1.30023e+08	1.39825e+08	1.49175e+08	1.58067e+08	1.66494e+08	1.74449e+08	1.81923e+08	1.8891e+08	1.95404e+08	2.01395e+08	2.06878e+08
Hokuriku Electric Power Group4	SDA intensity	JPN						0.555241																	0.603118	0.651263	0.72349	0.683748	0.644006	0.604264	0.564522	0.52478	0.485039	0.445297	0.405555	0.365813	0.326071	0.286329	0.246587	0.206845	0.167103	0.127361	0.0876196	0.0478777
Hokuriku Electric Power Group5	SDA cumulative emissions	JPN																							18760000	3.7715e+07	5.50093e+07	7.14746e+07	8.70967e+07	1.01862e+08	1.15755e+08	1.28764e+08	1.40873e+08	1.52069e+08	1.62337e+08	1.71664e+08	1.80035e+08	1.87437e+08	1.93854e+08	1.99275e+08	2.03683e+08	2.07065e+08	2.09408e+08	2.10696e+08
Hokuriku Electric Power Group6	marketshare	JPN																							0.0308394	0.0286928	0.0242006	0.0242006	0.0242006	0.0242006	0.0242006	0.0242006	0.0242006	0.0242006	0.0242006	0.0242006	0.0242006	0.0242006	0.0242006	0.0242006	0.0242006	0.0242006	0.0242006	0.0242006
Hokuriku Electric Power Group7	my	JPN																							1	1.07481	1.27432	1.27432	1.27432	1.27432	1.27432	1.27432	1.27432	1.27432	1.27432	1.27432	1.27432	1.27432	1.27432	1.27432	1.27432	1.27432	1.27432	1.27432
Hokuriku Electric Power Group8	consumes total budget Y/N?	JPN																							FALSE	FALSE	FALSE	FALSE	FALSE	FALSE	FALSE	FALSE	FALSE	FALSE	FALSE	FALSE	FALSE	FALSE	FALSE	FALSE	FALSE	FALSE	FALSE	FALSE
Hokuriku Electric Power Group9	Cumulative overshoot	JPN
Hokuriku Electric Power Group10	CBD Cumulative emissions	JPN																							1.49144e+07	2.90088e+07	4.00047e+07	5.04981e+07	6.04805e+07	6.99434e+07	7.88782e+07	8.72762e+07	9.51289e+07	1.02428e+08	1.09164e+08	1.1533e+08	1.20915e+08	1.25913e+08	1.30314e+08	1.34109e+08	1.37291e+08	1.3985e+08	1.41778e+08	1.43067e+08
Japanese companies	emissions in tCO2e (scope 1)	JPN																							242679000	242777000	228252000	2.21381e+08	2.16059e+08	2.09284e+08	2.0244e+08	1.95527e+08	1.88545e+08	1.81495e+08	1.72533e+08	1.63562e+08	1.54582e+08	1.45593e+08	1.36595e+08	1.27553e+08	1.18501e+08	1.09441e+08	1.00371e+08	9.1292e+07
Japanese companies1	output	JPN																							5.11753e+08	4.86946e+08	4.83331e+08	4.85801e+08	4.89369e+08	4.92938e+08	4.96506e+08	5.00075e+08	5.03643e+08	5.07212e+08	5.1078e+08	5.14349e+08	5.17917e+08	5.21486e+08	5.25054e+08	5.28623e+08	5.32191e+08	5.3576e+08	5.39328e+08	5.42897e+08
Japanese companies2	intensity	JPN													TRUE										0.474211	0.498571	0.472248	0.455704	0.441505	0.424564	0.407728	0.390995	0.374362	0.357828	0.337783	0.317999	0.298469	0.279189	0.260154	0.241292	0.222667	0.204272	0.186103	0.168157
Japanese companies3	cumulative emissions	JPN																							242679000	485456000	713708000	9.35089e+08	1.15115e+09	1.36043e+09	1.56287e+09	1.7584e+09	1.94694e+09	2.12844e+09	2.30097e+09	2.46453e+09	2.61912e+09	2.76471e+09	2.9013e+09	3.02886e+09	3.14736e+09	3.2568e+09	3.35717e+09	3.44846e+09
Japanese companies4	SDA intensity	JPN						0.426333																	0.474211	0.503474	0.469984	0.446059	0.421173	0.396286	0.3714	0.346514	0.321627	0.296741	0.271855	0.246968	0.222082	0.197196	0.172309	0.147423	0.122537	0.0976504	0.072764	0.0478777
Japanese companies5	SDA cumulative emissions	JPN																							242679000	4.87843e+08	7.15001e+08	9.31697e+08	1.13781e+09	1.33315e+09	1.51755e+09	1.69084e+09	1.85282e+09	2.00333e+09	2.14219e+09	2.26922e+09	2.38424e+09	2.48707e+09	2.57754e+09	2.65548e+09	2.72069e+09	2.77301e+09	2.81225e+09	2.83824e+09
Japanese companies6	marketshare	JPN																							0.507383	0.48005	0.489329	0.488217	0.488217	0.488217	0.488217	0.488217	0.488217	0.488217	0.488217	0.488217	0.488217	0.488217	0.488217	0.488217	0.488217	0.488217	0.488217	0.488217
Japanese companies7	my	JPN																							1	1.05694	1.0369	1.03926	1.03926	1.03926	1.03926	1.03926	1.03926	1.03926	1.03926	1.03926	1.03926	1.03926	1.03926	1.03926	1.03926	1.03926	1.03926	1.03926
Japanese companies8	consumes total budget Y/N?	JPN																							FALSE	FALSE	FALSE	FALSE	FALSE	FALSE	FALSE	FALSE	FALSE	FALSE	FALSE	FALSE	FALSE	FALSE	TRUE	TRUE	TRUE	TRUE	TRUE	TRUE
Japanese companies9	Cumulative overshoot	JPN
Japanese companies10	CBD Cumulative emissions	JPN																							2.45378e+08	4.81187e+08	7.0352e+08	9.15211e+08	1.11659e+09	1.3075e+09	1.48774e+09	1.65716e+09	1.81558e+09	1.96282e+09	2.09872e+09	2.2231e+09	2.33579e+09	2.43661e+09	2.52539e+09	2.60196e+09	2.66614e+09	2.71777e+09	2.75667e+09	2.78266e+09
PLN	emissions in tCO2e (scope 1)	IDN	https://web.pln.co.id/statics/uploads/2025/07/PLN-Climate-related-Disclosure-Report-2024.pdf		2028;2030;2060																				224930000	225900000	240620000	2.5672e+08	2.7854e+08	3.02158e+08	3.23338e+08	3.46481e+08	3.53625e+08	3.6288e+08	3.71582e+08	3.7818e+08	3.84036e+08	3.90945e+08	3.94435e+08	3.9128e+08	3.87072e+08	3.83917e+08	3.80522e+08	3.7292e+08	3.72897e+08	3.69622e+08	3.63311e+08	3.54561e+08	3.44234e+08
PLN1	output	IDN	Annual Report 2024; https://web.pln.co.id/statics/uploads/2025/09/SR-PLN-2024-LO8-HighRes-12-Sept.pdf	Output in 2022, 2023, 2024																					289471000	308000000	323320000	343890000	3.68007e+08	3.93815e+08	4.158e+08	4.39697e+08	4.5977e+08	4.83666e+08	5.12342e+08	5.40062e+08	5.68738e+08	6.01237e+08	6.30869e+08	6.51898e+08	6.72927e+08	6.97779e+08	7.24544e+08	7.45573e+08	7.84763e+08	8.21086e+08	8.54541e+08	8.86084e+08	9.17628e+08
PLN2	intensity	IDN	Climate Related Disclosures 2024;https://web.pln.co.id/statics/uploads/2025/07/PLN-Climate-related-Disclosure-Report-2024.pdf	Emissions in 2022, 2023, 2024. PLN reports electricity generation from IPPs as part of its own generation and PLN's climate targets cover activities from IPPs so emissions were calculated using scope 1 emissions from electricity generation from PLN + scope 3 emissions from electricity generation from IPPs.											TRUE										0.777038	0.733442	0.744216	0.746518	0.756888	0.767259	0.777629	0.788	0.769135	0.75027	0.725261	0.700252	0.675243	0.650234	0.625225	0.600216	0.575207	0.550198	0.525189	0.50018	0.475171	0.450162	0.425153	0.400144	0.375135
PLN3	cumulative emissions	IDN	Climate Related Disclosures 2023; https://web.pln.co.id/statics/uploads/2025/01/Climate-Related-Disclosure-2023.pdf	Emissions in 2021																					224930000	450830000	691450000	948170000	1.22671e+09	1.52887e+09	1.85221e+09	2.19869e+09	2.55231e+09	2.91519e+09	3.28677e+09	3.66495e+09	4.04899e+09	4.43994e+09	4.83437e+09	5.22565e+09	5.61272e+09	5.99664e+09	6.37716e+09	6.75008e+09	7.12298e+09	7.4926e+09	7.85591e+09	8.21047e+09	8.55471e+09
PLN4	SDA intensity	IDN	Annual Report 2023; https://web.pln.co.id/statics/uploads/2024/10/AR-PLN-2023_1610-hi.pdf	Output in 2021				0.558818																	0.777038	0.77484	0.783149	0.794169	0.801803	0.798611	0.791933	0.774969	0.766173	0.747162	0.71017	0.685285	0.648466	0.648734	0.64229	0.621178	0.60488	0.579534	0.553134	0.523314	0.491779	0.454596	0.43137	0.404436	0.344507
PLN5	SDA cumulative emissions	IDN																							224930000	4.63581e+08	7.16788e+08	9.89895e+08	1.28496e+09	1.59947e+09	1.92876e+09	2.26951e+09	2.62177e+09	2.98315e+09	3.347e+09	3.71709e+09	4.0859e+09	4.47594e+09	4.88114e+09	5.28609e+09	5.69313e+09	6.09752e+09	6.49829e+09	6.88845e+09	7.27438e+09	7.64765e+09	8.01627e+09	8.37463e+09	8.69076e+09
PLN6	marketshare	IDN																							0.668156	0.659386	0.658503	0.654632	0.654766	0.654766	0.654766	0.654766	0.654766	0.654766	0.654766	0.654766	0.654766	0.654766	0.654766	0.654766	0.654766	0.654766	0.654766	0.654766	0.654766	0.654766	0.654766	0.654766	0.654766
PLN7	my	IDN																							1	1.0133	1.01466	1.02066	1.02045	1.02045	1.02045	1.02045	1.02045	1.02045	1.02045	1.02045	1.02045	1.02045	1.02045	1.02045	1.02045	1.02045	1.02045	1.02045	1.02045	1.02045	1.02045	1.02045	1.02045
PLN8	consumes total budget Y/N?	IDN																							FALSE	FALSE	FALSE	FALSE	FALSE	FALSE	FALSE	FALSE	FALSE	FALSE	FALSE	FALSE	FALSE	FALSE	FALSE	FALSE	FALSE	FALSE	FALSE	FALSE	FALSE	FALSE	FALSE	FALSE	FALSE
PLN9	Cumulative overshoot	IDN
PLN10	CBD Cumulative emissions	IDN																							2.19524e+08	4.50271e+08	6.94823e+08	9.57436e+08	1.24117e+09	1.54361e+09	1.8603e+09	2.18813e+09	2.52709e+09	2.87496e+09	3.22551e+09	3.58229e+09	3.93818e+09	4.31456e+09	4.70564e+09	5.09671e+09	5.49002e+09	5.8811e+09	6.26906e+09	6.64722e+09	7.02181e+09	7.38483e+09	7.74384e+09	8.09349e+09	8.4035e+09
Indonesian companies	emissions in tCO2e (scope 1)	IDN	https://web.pln.co.id/statics/uploads/2025/07/PLN-Climate-related-Disclosure-Report-2024.pdf		2028;2030;2060																				224930000	225900000	240620000	2.5672e+08	2.7854e+08	3.02158e+08	3.23338e+08	3.46481e+08	3.53625e+08	3.6288e+08	3.71582e+08	3.7818e+08	3.84036e+08	3.90945e+08	3.94435e+08	3.9128e+08	3.87072e+08	3.83917e+08	3.80522e+08	3.7292e+08	3.72897e+08	3.69622e+08	3.63311e+08	3.54561e+08	3.44234e+08
Indonesian companies1	output	IDN	Annual Report 2024; https://web.pln.co.id/statics/uploads/2025/09/SR-PLN-2024-LO8-HighRes-12-Sept.pdf	Output in 2022, 2023, 2024																					289471000	308000000	323320000	343890000	3.68007e+08	3.93815e+08	4.158e+08	4.39697e+08	4.5977e+08	4.83666e+08	5.12342e+08	5.40062e+08	5.68738e+08	6.01237e+08	6.30869e+08	6.51898e+08	6.72927e+08	6.97779e+08	7.24544e+08	7.45573e+08	7.84763e+08	8.21086e+08	8.54541e+08	8.86084e+08	9.17628e+08
Indonesian companies2	intensity	IDN	Climate Related Disclosures 2024;https://web.pln.co.id/statics/uploads/2025/07/PLN-Climate-related-Disclosure-Report-2024.pdf	Emissions in 2022, 2023, 2024. PLN reports electricity generation from IPPs as part of its own generation and PLN's climate targets cover activities from IPPs so emissions were calculated using scope 1 emissions from electricity generation from PLN + scope 3 emissions from electricity generation from IPPs.											TRUE										0.777038	0.733442	0.744216	0.746518	0.756888	0.767259	0.777629	0.788	0.769135	0.75027	0.725261	0.700252	0.675243	0.650234	0.625225	0.600216	0.575207	0.550198	0.525189	0.50018	0.475171	0.450162	0.425153	0.400144	0.375135
Indonesian companies3	cumulative emissions	IDN	Climate Related Disclosures 2023; https://web.pln.co.id/statics/uploads/2025/01/Climate-Related-Disclosure-2023.pdf	Emissions in 2021																					224930000	450830000	691450000	948170000	1.22671e+09	1.52887e+09	1.85221e+09	2.19869e+09	2.55231e+09	2.91519e+09	3.28677e+09	3.66495e+09	4.04899e+09	4.43994e+09	4.83437e+09	5.22565e+09	5.61272e+09	5.99664e+09	6.37716e+09	6.75008e+09	7.12298e+09	7.4926e+09	7.85591e+09	8.21047e+09	8.55471e+09
Indonesian companies4	SDA intensity	IDN	Annual Report 2023; https://web.pln.co.id/statics/uploads/2024/10/AR-PLN-2023_1610-hi.pdf	Output in 2021				0.558818																	0.777038	0.77484	0.783149	0.794169	0.801803	0.798611	0.791933	0.774969	0.766173	0.747162	0.71017	0.685285	0.648466	0.648734	0.64229	0.621178	0.60488	0.579534	0.553134	0.523314	0.491779	0.454596	0.43137	0.404436	0.344507
Indonesian companies5	SDA cumulative emissions	IDN																							224930000	4.63581e+08	7.16788e+08	9.89895e+08	1.28496e+09	1.59947e+09	1.92876e+09	2.26951e+09	2.62177e+09	2.98315e+09	3.347e+09	3.71709e+09	4.0859e+09	4.47594e+09	4.88114e+09	5.28609e+09	5.69313e+09	6.09752e+09	6.49829e+09	6.88845e+09	7.27438e+09	7.64765e+09	8.01627e+09	8.37463e+09	8.69076e+09
Indonesian companies6	marketshare	IDN																							0.668156	0.659386	0.658503	0.654632	0.654766	0.654766	0.654766	0.654766	0.654766	0.654766	0.654766	0.654766	0.654766	0.654766	0.654766	0.654766	0.654766	0.654766	0.654766	0.654766	0.654766	0.654766	0.654766	0.654766	0.654766
Indonesian companies7	my	IDN																							1	1.0133	1.01466	1.02066	1.02045	1.02045	1.02045	1.02045	1.02045	1.02045	1.02045	1.02045	1.02045	1.02045	1.02045	1.02045	1.02045	1.02045	1.02045	1.02045	1.02045	1.02045	1.02045	1.02045	1.02045
Indonesian companies8	consumes total budget Y/N?	IDN																							FALSE	FALSE	FALSE	FALSE	FALSE	FALSE	FALSE	FALSE	FALSE	FALSE	FALSE	FALSE	FALSE	FALSE	FALSE	FALSE	FALSE	FALSE	FALSE	FALSE	FALSE	FALSE	FALSE	FALSE	FALSE
Indonesian companies9	Cumulative overshoot	IDN
Indonesian companies10	CBD Cumulative emissions	IDN																							2.19524e+08	4.50271e+08	6.94823e+08	9.57436e+08	1.24117e+09	1.54361e+09	1.8603e+09	2.18813e+09	2.52709e+09	2.87496e+09	3.22551e+09	3.58229e+09	3.93818e+09	4.31456e+09	4.70564e+09	5.09671e+09	5.49002e+09	5.8811e+09	6.26906e+09	6.64722e+09	7.02181e+09	7.38483e+09	7.74384e+09	8.09349e+09	8.4035e+09
Vietnam National Coal and Mineral Industries Holding Corporation Limited	Vinacomin owns and operates several coal-fired power plants but does not report its GHG emissions nor its electricity generation output	VNM
PetroVietnam Power Corporation (PV Power / “PV Power”)	Can be accessed	VNM
Hai Phong Thermal Power Joint Stock Company	No reporting	VNM
EVN	EVN is the state utility responsible for transmission, distribution, retail, and system operator, it also owns generation assets and subsidiaries that generate electricity. It reports electricity generation output but no information on GHG emissions.	VNM
Gia Lai Electricity Joint Stock Company	No reporting	VNM
POWER GENERATION JOINT STOCK CORPORATION 3 (GENCO3)	An EVN subsidiary. No emissions reporting	VNM
Endesa	emissions in tCO2e (scope 1)	ESP																					11236566	10297227	1.07006e+07	13266780	11570688	9923480	8.95478e+06	8.84998e+06	8.65086e+06	8.35741e+06	7.96964e+06	7.48754e+06
Endesa1	output	ESP	Annual Report 2024; https://www.endesa.com/content/dam/enel-es/endesa-en/home/investors/financialinformation/financialresults/documents/2024/news/fy/consolidated-annual-report-endesa-2024.pdf	Output and emissions in 2024																			61402000	56269000	57592000	64716000	60264000	59780000	6.17571e+07	6.60446e+07	7.03322e+07	7.46197e+07	7.89073e+07	8.31948e+07
Endesa2	intensity	ESP	Annual Report 2023; https://www.endesa.com/content/dam/enel-es/endesa-en/home/investors/financialinformation/financialresults/documents/2023/news/fy/Consolidated%20Annual%20Financial%20Report%20ENDESA%202023.pdf	Output and emissions in 2023													TRUE						0.183	0.183	0.1858	0.205	0.192	0.166	0.145	0.134	0.123	0.112	0.101	0.09
Endesa3	cumulative emissions	ESP	Annual Report 2022; https://www.endesa.com/content/dam/enel-es/endesa-en/home/investors/financialinformation/financialresults/documents/2022/fy/consolidated-annual-financial-report-endesa-2022.pdf	Output and emissions in 2022																			11236566	21533793	3.22344e+07	4.55012e+07	5.70719e+07	6.69953e+07	7.59501e+07	8.48001e+07	9.3451e+07	1.01808e+08	1.09778e+08	1.17266e+08
Endesa4	SDA intensity	ESP	Annual Report 2021; https://www.endesa.com/content/dam/enel-es/endesa-en/home/investors/financialinformation/financialresults/documents/2021/fy/annual-report-2021-cac-eng-v-cnmv.pdf	Output and emissions in 2021				0.154															0.183	0.13698	0.120101	0.0960556	0.0846644	0.0673346	0.0476349	0.0439079	0.0401809	0.036454	0.032727	0.029
Endesa5	SDA cumulative emissions	ESP	Annual Report 2020; https://www.endesa.com/content/dam/enel-es/endesa-en/home/investors/financialinformation/financialresults/documents/2020/fy2020/cmr-endesa-2020-eng-sum.pdf	Output in 2020 and 2019.																			11236566	1.89443e+07	2.58611e+07	3.20775e+07	3.71797e+07	4.1205e+07	4.41468e+07	4.70466e+07	4.98726e+07	5.25928e+07	5.51752e+07	5.75879e+07
Endesa6	marketshare	ESP	Non financial information report 2020; https://ddd.uab.cat/pub/infanu/118428/isENDESAa2020ispa.pdf	Emissions intensity in 2020. Emissions and Emissions intensity are not available in 2019 so emissions intensity in 2020 is used as a proxy for 2019.																			0.224704	0.213648	0.210642	0.228316	0.205337	0.196951	0.196951	0.196951	0.196951	0.196951	0.196951	0.196951
Endesa7	my	ESP																					1	1.05175	1.06676	0.984183	1.09432	1.14091	1.14091	1.14091	1.14091	1.14091	1.14091	1.14091
Endesa8	consumes total budget Y/N?	ESP																					FALSE	FALSE	FALSE	FALSE	FALSE	TRUE	TRUE	TRUE	TRUE	TRUE	TRUE	TRUE
Endesa9	Cumulative overshoot	ESP																					1	1.13669	1.24644	1.41848	1.53503	1.6259	1.7204	1.80247	1.87379	1.93578	1.98962	2.03629
Endesa10	CBD Cumulative emissions	ESP																					9885722	16469195	2.23551e+07	2.80113e+07	3.23864e+07	3.58417e+07	3.84973e+07	4.11523e+07	4.37827e+07	4.63645e+07	4.88738e+07	5.12864e+07
Iberdrola Espana	emissions in tCO2e (scope 1)	ESP	Informe de Gases de Efecto Invernadero 2024; https://www.iberdrola.com/documents/20125/41101/informe-gei-2024.pdf		2030	Carbon neutrality for direct emissions by 2030																	5.76348e+06	4702456	4535617	4250354	3745015	3058435	2.63299e+06	2.25263e+06	1.79915e+06	1.27255e+06	672836	0
Iberdrola Espana1	output	ESP	Informe de Gases de Efecto Invernadero 2024; https://www.iberdrola.com/documents/20125/41101/informe-gei-2024.pdf	Emissions intensity and scope 1 emissions in 2024																			5.63772e+07	6.26994e+07	6.57336e+07	6.15993e+07	6.45692e+07	6.64877e+07	6.86866e+07	7.34553e+07	7.82239e+07	8.29926e+07	8.77612e+07	9.25299e+07
Iberdrola Espana2	intensity	ESP	Informe de Gases de Efecto Invernadero 2023; https://www.iberdrola.com/documents/20125/41101/informe-gei-2023.pdf	Emissions intensity and scope 1 emissions in 2021, 2022, and 2023													TRUE						0.102231	0.075	0.069	0.069	0.058	0.046	0.0383333	0.0306667	0.023	0.0153333	0.00766667	0
Iberdrola Espana3	cumulative emissions	ESP	Informe de Gases de Efecto Invernadero 2023; https://www.iberdrola.com/documents/20125/41101/Informe_GEI_2021.pdf	Emissions intensity and scope 1 emissions in 2020. Graphical analysis used to estimate Emissions intensity and scope 1 emissions in 2019.																			5.76348e+06	1.04659e+07	1.50016e+07	1.92519e+07	2.29969e+07	2.60554e+07	2.86883e+07	3.0941e+07	3.27401e+07	3.40127e+07	3.46855e+07	3.46855e+07
Iberdrola Espana4	SDA intensity	ESP						0.0732308															0.102231	0.0713099	0.0638491	0.0597585	0.0516831	0.0440487	0.0363153	0.0348523	0.0333892	0.0319261	0.0304631	0.029
Iberdrola Espana5	SDA cumulative emissions	ESP																					5.76348e+06	1.02346e+07	1.44316e+07	1.81127e+07	2.14498e+07	2.43785e+07	2.68729e+07	2.9433e+07	3.20448e+07	3.46944e+07	3.73679e+07	4.00513e+07
Iberdrola Espana6	marketshare	ESP																					0.206315	0.238063	0.24042	0.21732	0.220006	0.219051	0.219051	0.219051	0.219051	0.219051	0.219051	0.219051
Iberdrola Espana7	my	ESP																					1	0.866642	0.858146	0.949362	0.937771	0.941862	0.941862	0.941862	0.941862	0.941862	0.941862	0.941862
Iberdrola Espana8	consumes total budget Y/N?	ESP																					FALSE	FALSE	FALSE	FALSE	FALSE	FALSE	FALSE	FALSE	FALSE	FALSE	FALSE	FALSE
Iberdrola Espana9	Cumulative overshoot	ESP																					1	1.02261	1.03949	1.0629	1.07213	1.06878	1.06756	1.05123	1.0217	0.980349	0.928216	0.866027
Iberdrola Espana10	CBD Cumulative emissions	ESP																					9.07672e+06	1.64126e+07	2.31305e+07	2.85143e+07	3.3202e+07	3.7045e+07	3.99985e+07	4.29514e+07	4.5877e+07	4.87486e+07	5.15394e+07	5.42227e+07
Naturgy	emissions in tCO2e (scope 1)	ESP	Integrated Annual Report 2024; https://stproportalcorporativo.blob.core.windows.net/uploads/2025/03/PACK_CONSO_2024_CNMV_ENG.pdf	Group-wide targets are applied to Spanish operations. This target "Reduce Scope 1 emissions from 14.74 MtCO2eq in the base year 2022 to 9.35 MtCO2eq in 2030, a reduction of 37%, a 54% reduction compared to 2017." was not used as it would lead to an increase in emissions compared with the 2027 intensity target.	2027;2030;2050	CO2 intensity in electricity generation (tCO2/GWh) of 184 in 2027.Achieve the Net Zero target for the group's Scope 1 and Scope 2 emissions.																	6.09887e+06	6133425	5010912	7529298	5045620	4.59036e+06	4.69379e+06	4.96792e+06	5.23533e+06	5.31299e+06	5.36289e+06	5.38504e+06
Naturgy1	output	ESP	Integrated Annual Report 2024; https://stproportalcorporativo.blob.core.windows.net/uploads/2025/03/PACK_CONSO_2024_CNMV_ENG.pdf	Output in Spain in 2024 and 2023, group-wide emissions intensity was used as a proxy for emissions intensity in Spain in 2019 to 2024.																			25771000	25917000	24920000	30907000	26314000	24184000	2.49838e+07	2.67184e+07	2.84529e+07	3.01874e+07	3.19219e+07	3.36565e+07
Naturgy2	intensity	ESP	Integrated Annual Report 2022; https://stproportalcorporativo.blob.core.windows.net/uploads/2023/02/Annual_Consolidated_Report_NATURGY_2022_ENG.pdf	Output in Spain in 2022 and 2021.													TRUE						0.236656	0.236656	0.20108	0.243611	0.191747	0.18981	0.187873	0.185937	0.184	0.176	0.168	0.16
Naturgy3	cumulative emissions	ESP	Corporate Responsibility Report 2019; https://stproportalcorporativo.blob.core.windows.net/uploads/2023/02/IRC_ENG_ACC.pdf	Scope 1 emissions from Electricity generation in Spain /emissions intensity from Electricity generation in Spain /emission are not available so the emissions intensity in 2020 was used as a proxy for the emissions intensity in 2019																			6.09887e+06	1.22323e+07	1.72432e+07	2.47725e+07	2.98181e+07	3.44085e+07	3.91023e+07	4.40702e+07	4.93055e+07	5.46185e+07	5.99814e+07	6.53664e+07
Naturgy4	SDA intensity	ESP	Sustainable Report 2020; https://stproportalcorporativo.blob.core.windows.net/uploads/2023/02/InformedeSostenibilidadyEINF_EN.pdf	Scope 1 emission in Spain in 2020				0.207656															0.236656	0.161679	0.148155	0.108463	0.101148	0.0826281	0.0550692	0.0498554	0.0446415	0.0394277	0.0342138	0.029
Naturgy5	SDA cumulative emissions	ESP	Sustainable Report 2021; https://stproportalcorporativo.blob.core.windows.net/uploads/2023/02/INFORME_SOSTENIBILIDAD_ENG.pdf	Scope 1 emission in Spain in 2021																			6.09887e+06	1.02891e+07	1.39811e+07	1.73334e+07	1.9995e+07	2.19932e+07	2.33691e+07	2.47011e+07	2.59713e+07	2.71615e+07	2.82537e+07	2.92297e+07
Naturgy6	marketshare	ESP	Sustainable Report 2022; https://stproportalcorporativo.blob.core.windows.net/uploads/2023/05/ISEINFF-2022_ENG.pdf	Scope 1 emission in Spain in 2022																			0.0943105	0.0984042	0.0911447	0.109039	0.0896595	0.0796767	0.0796767	0.0796767	0.0796767	0.0796767	0.0796767	0.0796767
Naturgy7	my	ESP	Sustainable Report 2023; https://stproportalcorporativo.blob.core.windows.net/uploads/2024/04/IA_Naturgy_2023_ENG_ACC.pdf	Scope 1 emission in Spain in 2023																			1	0.958399	1.03473	0.864927	1.05187	1.18366	1.18366	1.18366	1.18366	1.18366	1.18366	1.18366
Naturgy8	consumes total budget Y/N?	ESP																					FALSE	FALSE	FALSE	FALSE	TRUE	TRUE	TRUE	TRUE	TRUE	TRUE	TRUE	TRUE
Naturgy9	Cumulative overshoot	ESP																					1	1.18886	1.23332	1.42918	1.49128	1.5645	1.67325	1.78414	1.89846	2.01088	2.12296	2.2363
Naturgy10	CBD Cumulative emissions	ESP																					4149131	7181420	9728244	1.24295e+07	1.43399e+07	1.57377e+07	1.68121e+07	1.78861e+07	1.89503e+07	1.99948e+07	2.10099e+07	2.19859e+07
EDP Espana	Energy company operating in several countries including Spain. Reporting includes a geographical breakdown but at the "Iberia" level, not just Spain.
ACCIONA Energía	Energy company operating in several countries including Spain. Reporting includes a geographical breakdown for electricity production in Spain, but not for scope 1 emissions or emissions intensity.
Repsol	Energy company operating globally. No reporting for Spain for electricity generation.
Spanish companies	emissions in tCO2e (scope 1)	ESP																					2.30989e+07	21133108	2.02471e+07	25046432	20361323	1.75723e+07	1.62816e+07	1.60705e+07	1.56853e+07	1.49429e+07	1.40054e+07	1.28726e+07
Spanish companies1	output	ESP	Informe de Gases de Efecto Invernadero 2024; https://www.iberdrola.com/documents/20125/41101/informe-gei-2024.pdf	Emissions intensity and scope 1 emissions in 2024																			1.4355e+08	1.44885e+08	1.48246e+08	1.57222e+08	1.51147e+08	1.50452e+08	1.55428e+08	1.66218e+08	1.77009e+08	1.878e+08	1.9859e+08	2.09381e+08
Spanish companies2	intensity	ESP	Informe de Gases de Efecto Invernadero 2023; https://www.iberdrola.com/documents/20125/41101/informe-gei-2023.pdf	Emissions intensity and scope 1 emissions in 2021, 2022, and 2023													TRUE						0.160912	0.145861	0.136578	0.159306	0.134712	0.116797	0.104753	0.0966833	0.0886132	0.0795685	0.0705238	0.0614791
Spanish companies3	cumulative emissions	ESP	Informe de Gases de Efecto Invernadero 2023; https://www.iberdrola.com/documents/20125/41101/Informe_GEI_2021.pdf	Emissions intensity and scope 1 emissions in 2020. Graphical analysis used to estimate Emissions intensity and scope 1 emissions in 2019.																			2.30989e+07	4.4232e+07	6.44791e+07	8.95256e+07	1.09887e+08	1.27459e+08	1.43741e+08	1.59811e+08	1.75497e+08	1.9044e+08	2.04445e+08	2.17317e+08
Spanish companies4	SDA intensity	ESP						0.131912															0.160912	0.112979	0.0998742	0.0842735	0.0734446	0.0595024	0.0438276	0.0408621	0.0378965	0.034931	0.0319655	0.029
Spanish companies5	SDA cumulative emissions	ESP																					2.30989e+07	3.94679e+07	5.42739e+07	6.75235e+07	7.86245e+07	8.75767e+07	9.43887e+07	1.01181e+08	1.07889e+08	1.14449e+08	1.20797e+08	1.26869e+08
Spanish companies6	marketshare	ESP																					0.52533	0.550115	0.542207	0.554674	0.515003	0.495679	0.495679	0.495679	0.495679	0.495679	0.495679	0.495679
Spanish companies7	my	ESP																					1	0.954946	0.968874	0.947097	1.02005	1.05982	1.05982	1.05982	1.05982	1.05982	1.05982	1.05982
Spanish companies8	consumes total budget Y/N?	ESP																					FALSE	FALSE	FALSE	FALSE	FALSE	TRUE	TRUE	TRUE	TRUE	TRUE	TRUE	TRUE
Spanish companies9	Cumulative overshoot	ESP																					1	1.12071	1.18803	1.32584	1.39762	1.4554	1.52286	1.57946	1.62664	1.66397	1.69247	1.71293
Spanish companies10	CBD Cumulative emissions	ESP																					2.31116e+07	4.00632e+07	5.52139e+07	6.89551e+07	7.99284e+07	8.86245e+07	9.53079e+07	1.0199e+08	1.0861e+08	1.15108e+08	1.21423e+08	1.27495e+08
RWE NDL	emissions in tCO2e (scope 1)	NLD	Annual Report 2024; https://www.rwe.com/-/media/RWE/documents/05-investor-relations/finanzkalendar-und-veroeffentlichungen/2024-gj/2025-03-20-rwe-annual-report-2024.pdf	Company-wide targets were applied to the NDL activities.	2030;2040	Reduce company-wide carbon intensity by 71.1% compared with 2022 by 2030 and net zero by 2040.	2023																			7000000	5500000	4900000	4.6425e+06	4.31726e+06	3.92429e+06	3.46359e+06	2.93514e+06	2.33897e+06	2.20826e+06	2.05462e+06	1.87805e+06	1.67855e+06	1.45612e+06	1.19394e+06	917242	626018	320270	0	0	0	0	0	0
RWE NDL1	output	NLD	Annual Report 2024; https://www.rwe.com/-/media/RWE/documents/05-investor-relations/finanzkalendar-und-veroeffentlichungen/2024-gj/2025-03-20-rwe-annual-report-2024.pdf	Output and emissions in 2024 and 2023																						17254000	15755000	14452000	1.53681e+07	1.62843e+07	1.72004e+07	1.81166e+07	1.90327e+07	1.99489e+07	2.09267e+07	2.19046e+07	2.28825e+07	2.38604e+07	2.48383e+07	2.54576e+07	2.60769e+07	2.66963e+07	2.73156e+07	2.79349e+07	2.83359e+07	2.87368e+07	2.91377e+07	2.95387e+07	2.99396e+07
RWE NDL2	intensity	NLD	Annual Report 2022; https://www.rwe.com/-/media/RWE/documents/05-investor-relations/finanzkalendar-und-veroeffentlichungen/2022-GJ/2023-03-21-rwe-annual-report-2022.pdf	Output and emissions in 2022 and 2021													TRUE									0.405703	0.349096	0.339053	0.302086	0.265118	0.228151	0.191183	0.154216	0.117248	0.105523	0.0937985	0.0820737	0.0703489	0.0586241	0.0468993	0.0351745	0.0234496	0.0117248	0	0	0	0	0	0
RWE NDL3	cumulative emissions	NLD	Annual Report 2020; https://www.rwe.com/-/media/RWE/documents/05-investor-relations/finanzkalendar-und-veroeffentlichungen/2020-Q4/2021-03-16-rwe-annual-report-2020.pdf?sc_lang=en	Output and emissions in 2020																						7000000	12500000	17400000	2.20425e+07	2.63598e+07	3.02841e+07	3.37476e+07	3.66828e+07	3.90218e+07	4.123e+07	4.32846e+07	4.51627e+07	4.68412e+07	4.82974e+07	4.94913e+07	5.04085e+07	5.10346e+07	5.13548e+07	5.13548e+07	5.13548e+07	5.13548e+07	5.13548e+07	5.13548e+07	5.13548e+07
RWE NDL4	SDA intensity	NLD						0.405703																		0.405703	0.346702	0.351679	0.319708	0.287737	0.255766	0.223795	0.191825	0.159854	0.127883	0.0959124	0.0639416	0.0319708	0	0	0	0	0	0	0	0	0	0	0
RWE NDL5	SDA cumulative emissions	NLD																								7000000	1.24623e+07	1.75448e+07	2.24581e+07	2.71437e+07	3.1543e+07	3.55974e+07	3.92483e+07	4.24372e+07	4.51134e+07	4.72143e+07	4.86775e+07	4.94403e+07	4.94403e+07	4.94403e+07	4.94403e+07	4.94403e+07	4.94403e+07	4.94403e+07	4.94403e+07	4.94403e+07	4.94403e+07	4.94403e+07	4.94403e+07
RWE NDL6	marketshare	NLD																								0.141923	0.129851	0.117346	0.117346	0.117346	0.117346	0.117346	0.117346	0.117346	0.117346	0.117346	0.117346	0.117346	0.117346	0.117346	0.117346	0.117346	0.117346	0.117346	0.117346	0.117346	0.117346	0.117346	0.117346
RWE NDL7	my	NLD																								1	1.09296	1.20944	1.20944	1.20944	1.20944	1.20944	1.20944	1.20944	1.20944	1.20944	1.20944	1.20944	1.20944	1.20944	1.20944	1.20944	1.20944	1.20944	1.20944	1.20944	1.20944	1.20944	1.20944
RWE NDL8	consumes total budget Y/N?	NLD																								FALSE	FALSE	FALSE	FALSE	FALSE	FALSE	FALSE	FALSE	FALSE	FALSE	FALSE	FALSE	FALSE	FALSE	TRUE	TRUE	TRUE	TRUE	TRUE	TRUE	TRUE	TRUE	TRUE	TRUE
RWE NDL9	Cumulative overshoot	NLD																								1	1.00303	0.991749	0.981496	0.97112	0.960089	0.948038	0.934634	0.919517	0.91392	0.916769	0.927795	0.947431	0.976883	1.00103	1.01958	1.03225	1.03872	1.03872	1.03872	1.03872	1.03872	1.03872	1.03872
RWE NDL10	CBD Cumulative emissions	NLD																								4.32865e+06	7.41911e+06	1.00177e+07	1.25299e+07	1.49256e+07	1.71749e+07	1.92479e+07	2.11146e+07	2.27451e+07	2.41134e+07	2.51876e+07	2.59357e+07	2.63257e+07	2.63257e+07	2.63257e+07	2.63257e+07	2.63257e+07	2.63257e+07	2.63257e+07	2.63257e+07	2.63257e+07	2.63257e+07	2.63257e+07	2.63257e+07
Eneco	emissions in tCO2e (scope 1)	NLD	Annual Report 2024; https://www.eneco.nl/-/media/eneco-com/files/eneco-annual-report-2024.pdf?rev=7883778bb651414e8fd155d9cdc67705&sc_lang=en		2035	Net zero by 2035	2024																			1300000	1168000	1189000	1.14943e+06	1.09616e+06	1.02918e+06	948496	854109	746018	626070	491494	342291	178459	0	0	0	0	0	0	0	0	0	0	0
Eneco1	output	NLD	Annual Report 2024; https://www.eneco.nl/-/media/eneco-com/files/eneco-annual-report-2024.pdf?rev=7883778bb651414e8fd155d9cdc67705&sc_lang=en	Emissions and output in NDL in 2024 and 2023			2024																			15601000	13999000	12215000	1.29893e+07	1.37637e+07	1.4538e+07	1.53123e+07	1.60867e+07	1.6861e+07	1.76875e+07	1.85141e+07	1.93406e+07	2.01671e+07	2.09936e+07	2.15171e+07	2.20405e+07	2.2564e+07	2.30875e+07	2.36109e+07	2.39498e+07	2.42887e+07	2.46275e+07	2.49664e+07	2.53053e+07
Eneco2	intensity	NLD	Annual Report 2022; https://www.eneco.nl/-/media/eneco-com/files/eneco_annual_report_2022.pdf?rev=030827d06cbf4694a538436df3ee7b25&sc_lang=en	Emissions and output in NDL in 2022													TRUE									0.083328	0.0834345	0.0973393	0.0884903	0.0796413	0.0707922	0.0619432	0.0530942	0.0442452	0.0353961	0.0265471	0.0176981	0.00884903	0	0	0	0	0	0	0	0	0	0	0
Eneco3	cumulative emissions	NLD																								1300000	2468000	3657000	4.80643e+06	5.90259e+06	6.93176e+06	7.88026e+06	8.73437e+06	9.48039e+06	1.01065e+07	1.0598e+07	1.09402e+07	1.11187e+07	1.11187e+07	1.11187e+07	1.11187e+07	1.11187e+07	1.11187e+07	1.11187e+07	1.11187e+07	1.11187e+07	1.11187e+07	1.11187e+07	1.11187e+07
Eneco4	SDA intensity	NLD						0.083328																		0.083328	0.0724642	0.0772726	0.0702479	0.0632231	0.0561983	0.0491735	0.0421487	0.0351239	0.0280991	0.0210744	0.0140496	0.00702479	0	0	0	0	0	0	0	0	0	0	0
Eneco5	SDA cumulative emissions	NLD																								1300000	2.31443e+06	3.25831e+06	4.17078e+06	5.04097e+06	5.85798e+06	6.61094e+06	7.28897e+06	7.8812e+06	8.3782e+06	8.76837e+06	9.0401e+06	9.18177e+06	9.18177e+06	9.18177e+06	9.18177e+06	9.18177e+06	9.18177e+06	9.18177e+06	9.18177e+06	9.18177e+06	9.18177e+06	9.18177e+06	9.18177e+06
Eneco6	marketshare	NLD																								0.128326	0.115379	0.0991823	0.0991823	0.0991823	0.0991823	0.0991823	0.0991823	0.0991823	0.0991823	0.0991823	0.0991823	0.0991823	0.0991823	0.0991823	0.0991823	0.0991823	0.0991823	0.0991823	0.0991823	0.0991823	0.0991823	0.0991823	0.0991823
Eneco7	my	NLD																								1	1.11222	1.29384	1.29384	1.29384	1.29384	1.29384	1.29384	1.29384	1.29384	1.29384	1.29384	1.29384	1.29384	1.29384	1.29384	1.29384	1.29384	1.29384	1.29384	1.29384	1.29384	1.29384	1.29384
Eneco8	consumes total budget Y/N?	NLD																								FALSE	FALSE	FALSE	FALSE	FALSE	FALSE	FALSE	FALSE	TRUE	TRUE	TRUE	TRUE	TRUE	TRUE	TRUE	TRUE	TRUE	TRUE	TRUE	TRUE	TRUE	TRUE	TRUE	TRUE
Eneco9	Cumulative overshoot	NLD																								1	1.06636	1.12236	1.1524	1.17092	1.1833	1.192	1.1983	1.20291	1.20628	1.20866	1.21019	1.21095	1.21095	1.21095	1.21095	1.21095	1.21095	1.21095	1.21095	1.21095	1.21095	1.21095	1.21095
Eneco10	CBD Cumulative emissions	NLD																								3.91395e+06	6.65996e+06	8.85635e+06	1.09797e+07	1.30045e+07	1.49057e+07	1.66578e+07	1.82356e+07	1.96137e+07	2.07702e+07	2.16781e+07	2.23104e+07	2.26401e+07	2.26401e+07	2.26401e+07	2.26401e+07	2.26401e+07	2.26401e+07	2.26401e+07	2.26401e+07	2.26401e+07	2.26401e+07	2.26401e+07	2.26401e+07
Vattenfal	emissions in tCO2e (scope 1)	NLD	CO2 Report Vattefnall in the Netherlands 2017-2040; https://www.vattenfall.nl/media/4.-over-vattenfall-corporate/2.-wat-we-doen/1.-ons-plan/onze-klimaatambitie-rapport-co2-reductie-2017-2040-mei-2025.pdf?utm_source=chatgpt.com		2030;2040	Reach scope 1 emissions of 3.3 MtCO2 in 2030 and 0 in 2040															6100000	5700000	5300000	4900000	4500000	4100000	3700000	3300000	2950000	2600000	2250000	1900000	1550000	1200000	1080000	960000	840000	720000	600000	480000	360000	240000	120000	0	0	0	0	0	0
Vattenfal1	output	NLD	Annual Report 2024; https://group.vattenfall.com/globalassets/com/sustainability/vattenfall-annual-and-sustainability-report-2024.pdf	Electricity generation in 2024 and 2023																						11500000	10200000	12200000	1.29734e+07	1.37468e+07	1.45202e+07	1.52935e+07	1.60669e+07	1.68403e+07	1.76658e+07	1.84913e+07	1.93168e+07	2.01423e+07	2.09678e+07	2.14907e+07	2.20135e+07	2.25363e+07	2.30591e+07	2.35819e+07	2.39204e+07	2.42588e+07	2.45973e+07	2.49358e+07	2.52742e+07
Vattenfal2	intensity	NLD	Annual Report 2022; https://group.vattenfall.com/siteassets/corporate/investors/annual-reports/2022/vattenfall-annual-and-sustainability-report-2022.pdf	Electricity generation in 2022													TRUE									0.356522	0.362745	0.270492	0.248503	0.226514	0.204525	0.182537	0.160548	0.0712576	0.061135	0.0519163	0.0434854	0.0357456	0.0286153	0.0223353	0.0163536	0.0106495	0.00520402	0	0	0	0	0	0
Vattenfal3	cumulative emissions	NLD	CO2 Report Vattefnall in the Netherlands 2017-2040; https://www.vattenfall.nl/media/4.-over-vattenfall-corporate/2.-wat-we-doen/1.-ons-plan/onze-klimaatambitie-rapport-co2-reductie-2017-2040-mei-2025.pdf?utm_source=chatgpt.com	Emissions in 2024 and 2017. Linear interpolation was used to estimate emissions between 2017 and 2024																						4100000	7800000	11100000	14050000	16650000	18900000	20800000	22350000	23550000	24630000	25590000	26430000	27150000	27750000	28230000	28590000	28830000	28950000	28950000	28950000	28950000	28950000	28950000	28950000
Vattenfal4	SDA intensity	NLD						0.356522																		0.356522	0.313661	0.244006	0.221823	0.199641	0.177459	0.155276	0.133094	0.110912	0.0887293	0.066547	0.0443647	0.0221823	0	0	0	0	0	0	0	0	0	0	0
Vattenfal5	SDA cumulative emissions	NLD																								4100000	7.29934e+06	1.02762e+07	1.3154e+07	1.58984e+07	1.84752e+07	2.08499e+07	2.29883e+07	2.48561e+07	2.64236e+07	2.76541e+07	2.85111e+07	2.89579e+07	2.89579e+07	2.89579e+07	2.89579e+07	2.89579e+07	2.89579e+07	2.89579e+07	2.89579e+07	2.89579e+07	2.89579e+07	2.89579e+07	2.89579e+07
Vattenfal6	marketshare	NLD																								0.0945934	0.0840676	0.0990605	0.0990605	0.0990605	0.0990605	0.0990605	0.0990605	0.0990605	0.0990605	0.0990605	0.0990605	0.0990605	0.0990605	0.0990605	0.0990605	0.0990605	0.0990605	0.0990605	0.0990605	0.0990605	0.0990605	0.0990605	0.0990605
Vattenfal7	my	NLD																								1	1.12521	0.954905	0.954905	0.954905	0.954905	0.954905	0.954905	0.954905	0.954905	0.954905	0.954905	0.954905	0.954905	0.954905	0.954905	0.954905	0.954905	0.954905	0.954905	0.954905	0.954905	0.954905	0.954905
Vattenfal8	consumes total budget Y/N?	NLD																								FALSE	FALSE	FALSE	FALSE	FALSE	FALSE	FALSE	FALSE	FALSE	FALSE	FALSE	FALSE	FALSE	FALSE	FALSE	FALSE	FALSE	FALSE	FALSE	FALSE	FALSE	FALSE	FALSE	FALSE
Vattenfal9	Cumulative overshoot	NLD																								1	1.06859	1.08016	1.06812	1.04727	1.023	0.997608	0.972234	0.947454	0.932123	0.92536	0.927008	0.937568	0.958288	0.974864	0.987296	0.995584	0.999728	0.999728	0.999728	0.999728	0.999728	0.999728	0.999728
Vattenfal10	CBD Cumulative emissions	NLD																								2.8851e+06	4.88591e+06	7.0796e+06	9.20029e+06	1.12227e+07	1.31215e+07	1.48715e+07	1.64473e+07	1.78237e+07	1.89788e+07	1.98856e+07	2.05171e+07	2.08464e+07	2.08464e+07	2.08464e+07	2.08464e+07	2.08464e+07	2.08464e+07	2.08464e+07	2.08464e+07	2.08464e+07	2.08464e+07	2.08464e+07	2.08464e+07
Dutch companies	emissions in tCO2e (scope 1)	NLD																								12400000	10368000	9389000	8.74193e+06	8.01342e+06	7.20347e+06	6.31208e+06	5.33925e+06	4.28499e+06	3.91433e+06	3.50612e+06	3.06034e+06	2.57701e+06	2.05612e+06	1.67394e+06	1.27724e+06	866018	440270	0	0	0	0	0	0
Dutch companies1	output	NLD																								44355000	39954000	38867000	4.13309e+07	4.37947e+07	4.62586e+07	4.87225e+07	5.11863e+07	5.36502e+07	5.62801e+07	5.891e+07	6.15399e+07	6.41698e+07	6.67997e+07	6.84653e+07	7.0131e+07	7.17966e+07	7.34622e+07	7.51278e+07	7.6206e+07	7.72843e+07	7.83626e+07	7.94408e+07	8.05191e+07
Dutch companies2	intensity	NLD															TRUE									0.279563	0.259498	0.241567	0.211511	0.182977	0.155722	0.129552	0.10431	0.079869	0.0695509	0.0595165	0.0497294	0.0401593	0.0307804	0.0244495	0.0182122	0.0120621	0.00599316	0	0	0	0	0	0
Dutch companies3	cumulative emissions	NLD																								12400000	22768000	32157000	4.08989e+07	4.89123e+07	5.61158e+07	6.24279e+07	6.77672e+07	7.20521e+07	7.59665e+07	7.94726e+07	8.25329e+07	8.51099e+07	8.71661e+07	8.884e+07	9.01173e+07	9.09833e+07	9.14235e+07	9.14235e+07	9.14235e+07	9.14235e+07	9.14235e+07	9.14235e+07	9.14235e+07
Dutch companies4	SDA intensity	NLD						0.279563																		0.279563	0.24218	0.231642	0.210583	0.189525	0.168467	0.147408	0.12635	0.105292	0.0842333	0.063175	0.0421167	0.0210583	0	0	0	0	0	0	0	0	0	0	0
Dutch companies5	SDA cumulative emissions	NLD																								12400000	2.20761e+07	3.10793e+07	3.97829e+07	4.80831e+07	5.58761e+07	6.30582e+07	6.95256e+07	7.51745e+07	7.99151e+07	8.36368e+07	8.62286e+07	8.75799e+07	8.75799e+07	8.75799e+07	8.75799e+07	8.75799e+07	8.75799e+07	8.75799e+07	8.75799e+07	8.75799e+07	8.75799e+07	8.75799e+07	8.75799e+07
Dutch companies6	marketshare	NLD																								0.364843	0.329298	0.315589	0.315589	0.315589	0.315589	0.315589	0.315589	0.315589	0.315589	0.315589	0.315589	0.315589	0.315589	0.315589	0.315589	0.315589	0.315589	0.315589	0.315589	0.315589	0.315589	0.315589	0.315589
Dutch companies7	my	NLD																								1	1.10794	1.15607	1.15607	1.15607	1.15607	1.15607	1.15607	1.15607	1.15607	1.15607	1.15607	1.15607	1.15607	1.15607	1.15607	1.15607	1.15607	1.15607	1.15607	1.15607	1.15607	1.15607	1.15607
Dutch companies8	consumes total budget Y/N?	NLD																								FALSE	FALSE	FALSE	FALSE	FALSE	FALSE	FALSE	FALSE	FALSE	FALSE	FALSE	FALSE	FALSE	FALSE	TRUE	TRUE	TRUE	TRUE	TRUE	TRUE	TRUE	TRUE	TRUE	TRUE
Dutch companies9	Cumulative overshoot	NLD																								1	1.03134	1.03468	1.02805	1.01725	1.00429	0.990005	0.974708	0.958465	0.950589	0.950211	0.957141	0.971797	0.995274	1.01439	1.02897	1.03886	1.04389	1.04389	1.04389	1.04389	1.04389	1.04389	1.04389
Dutch companies10	CBD Cumulative emissions	NLD																								1.11277e+07	1.8965e+07	2.59537e+07	3.27098e+07	3.91528e+07	4.52022e+07	5.07772e+07	5.57975e+07	6.01825e+07	6.38624e+07	6.67513e+07	6.87632e+07	6.98122e+07	6.98122e+07	6.98122e+07	6.98122e+07	6.98122e+07	6.98122e+07	6.98122e+07	6.98122e+07	6.98122e+07	6.98122e+07	6.98122e+07	6.98122e+07
EDF	emissions in tCO2e (scope 1)	FRA	Annual Report 2024; https://www.edf.fr/sites/groupe/files/2025-04/2025-04-24-edf-urd-2024.pdf		2025;2027;2030;2035;2050	Reduction in scope 1 emissions of 60% by 2017, 65% by 2027; 70% by 2030 and 80% by 2035 compared with 2017. Net zero by 2050.																	2.81435e+07	3.13712e+07	3.1283e+07	2.30798e+07	2.46087e+07	2.61386e+07	1.52541e+07	1.44884e+07	1.37373e+07	1.32661e+07	1.27971e+07	1.231e+07	1.16092e+07	1.08933e+07	1.0158e+07	9.41097e+06	8.641e+06	8.17192e+06	7.68056e+06	7.16596e+06	6.63865e+06	6.1051e+06	5.5808e+06	5.03649e+06	4.46947e+06	3.88264e+06	3.27643e+06
EDF1	output	FRA	Annual Report 2024; https://www.edf.fr/sites/groupe/files/2025-04/2025-04-24-edf-urd-2024.pdf	Output in 2024																			422700000	382800000	413100000	322700000	365900000	415000000	4.17297e+08	4.22774e+08	4.29487e+08	4.35494e+08	4.42207e+08	4.49009e+08	4.53691e+08	4.58461e+08	4.63143e+08	4.6809e+08	4.72771e+08	4.79043e+08	4.84873e+08	4.90085e+08	4.95297e+08	5.01039e+08	5.08901e+08	5.16674e+08	5.24006e+08	5.31073e+08	5.37786e+08
EDF2	intensity	FRA	Annual Report 2023; https://www.edf.fr/sites/groupe/files/2024-04/edf-urd-rapport-financier-annuel-2023-fr.pdf	Output in 2023													TRUE						0.0665804	0.081952	0.0757273	0.071521	0.0672553	0.0629847	0.0365546	0.03427	0.0319853	0.0304622	0.0289391	0.027416	0.0255883	0.0237605	0.0219328	0.0201051	0.0182773	0.0170588	0.0158403	0.0146219	0.0134034	0.0121849	0.0109664	0.00974791	0.00852942	0.00731093	0.00609244
EDF3	cumulative emissions	FRA	Annual Report 2022; https://www.edf.fr/sites/groupe/files/2023-03/edf-urd-rapport-financier-annuel-2022-fr.pdf	Output in 2022																			2.81435e+07	5.95148e+07	9.07977e+07	1.13878e+08	1.38486e+08	1.64625e+08	1.79879e+08	1.94367e+08	2.08105e+08	2.21371e+08	2.34168e+08	2.46478e+08	2.58087e+08	2.6898e+08	2.79138e+08	2.88549e+08	2.9719e+08	3.05362e+08	3.13043e+08	3.20209e+08	3.26847e+08	3.32953e+08	3.38533e+08	3.4357e+08	3.48039e+08	3.51922e+08	3.55198e+08
EDF4	SDA intensity	FRA	Annual Report 2021; https://www.edf.fr/sites/groupe/files/2022-03/edf-urd-rapport-financier-annuel-2021-fr-v2.pdf	Output in 2021				0.0665303															0.0665804	0.0865302	0.0760683	0.0920927	0.0765769	0.0634239	0.0589988	0.058407	0.0576638	0.057036	0.056335	0.055644	0.0548275	0.0540172	0.0532338	0.0524363	0.0516845	0.0408162	0.0302563	0.0199725	0.00990513	4.73734e-05	4.65239e-05	4.57082e-05	4.49548e-05	4.42444e-05	4.35815e-05
EDF5	SDA cumulative emissions	FRA	Annual Report 2020; https://www.edf.fr/sites/groupe/files/contrib/groupe-edf/espaces-dedies/espace-finance-fr/informations-financieres/informations-reglementees/urd/edf-urd-rapport-financier-annuel-2020-fr-hd.pdf	Output in 2020																			2.81435e+07	6.12673e+07	9.26911e+07	1.22409e+08	1.50429e+08	1.7675e+08	2.0137e+08	2.26063e+08	2.50829e+08	2.75667e+08	3.00579e+08	3.25564e+08	3.50439e+08	3.75203e+08	3.99858e+08	4.24403e+08	4.48838e+08	4.68391e+08	4.83061e+08	4.9285e+08	4.97755e+08	4.97779e+08	4.97803e+08	4.97827e+08	4.9785e+08	4.97874e+08	4.97897e+08
EDF6	marketshare	FRA	Annual Report 2017; https://www.edf.fr/sites/groupe/files/contrib/groupe-edf/espaces-dedies/espace-finance-fr/informations-financieres/informations-reglementees/document-de-reference/edf-ddr-2017-version-accessible-fr.pdf	Output in 2017																			0.88952	0.84243	0.885531	0.690711	0.78117	0.883355	0.883355	0.883355	0.883355	0.883355	0.883355	0.883355	0.883355	0.883355	0.883355	0.883355	0.883355	0.883355	0.883355	0.883355	0.883355	0.883355	0.883355	0.883355	0.883355	0.883355	0.883355
EDF7	my	FRA	Annual Report 2019;https://labrador.cld.bz/EDF-Document-d-enregistrement-universel-2019/16/	Output in 2019																			1	1.0559	1.00451	1.28783	1.1387	1.00698	1.00698	1.00698	1.00698	1.00698	1.00698	1.00698	1.00698	1.00698	1.00698	1.00698	1.00698	1.00698	1.00698	1.00698	1.00698	1.00698	1.00698	1.00698	1.00698	1.00698	1.00698
EDF8	consumes total budget Y/N?	FRA	EDF does not report its GHG emissions at the country level. Since it's production accounts for 88% of the country's electricity generation, the country's carbon intensity was used as a proxy for EDF's carbon intensity.																				FALSE	FALSE	FALSE	FALSE	FALSE	FALSE	FALSE	FALSE	FALSE	FALSE	FALSE	FALSE	FALSE	FALSE	FALSE	FALSE	FALSE	FALSE	FALSE	FALSE	FALSE	FALSE	FALSE	FALSE	FALSE	FALSE	FALSE
EDF9	Cumulative overshoot	FRA																					1	0.971395	0.979573	0.930301	0.92061	0.931401	0.893277	0.859794	0.829669	0.803036	0.779056	0.75708	0.736469	0.716892	0.698093	0.679895	0.662133	0.651939	0.64804	0.649709	0.656643	0.668876	0.680055	0.69014	0.699085	0.70685	0.713397
EDF10	CBD Cumulative emissions	FRA																					2.81435e+07	5.95148e+07	9.07977e+07	1.13878e+08	1.38486e+08	1.64625e+08	1.89074e+08	2.13596e+08	2.38191e+08	2.62857e+08	2.87597e+08	3.12408e+08	3.37111e+08	3.61704e+08	3.86188e+08	4.10563e+08	4.34829e+08	4.54246e+08	4.68815e+08	4.78536e+08	4.83408e+08	4.83432e+08	4.83455e+08	4.83479e+08	4.83503e+08	4.83526e+08	4.8355e+08
French companies	emissions in tCO2e (scope 1)	FRA	Annual Report 2024; https://www.edf.fr/sites/groupe/files/2025-04/2025-04-24-edf-urd-2024.pdf		2025;2027;2030;2035;2050	Reduction in scope 1 emissions of 60% by 2017, 65% by 2027; 70% by 2030 and 80% by 2035 compared with 2017. Net zero by 2050.																	2.81435e+07	3.13712e+07	3.1283e+07	2.30798e+07	2.46087e+07	2.61386e+07	1.52541e+07	1.44884e+07	1.37373e+07	1.32661e+07	1.27971e+07	1.231e+07	1.16092e+07	1.08933e+07	1.0158e+07	9.41097e+06	8.641e+06	8.17192e+06	7.68056e+06	7.16596e+06	6.63865e+06	6.1051e+06	5.5808e+06	5.03649e+06	4.46947e+06	3.88264e+06	3.27643e+06
French companies1	output	FRA	Annual Report 2024; https://www.edf.fr/sites/groupe/files/2025-04/2025-04-24-edf-urd-2024.pdf	Output in 2024																			422700000	382800000	413100000	322700000	365900000	415000000	4.17297e+08	4.22774e+08	4.29487e+08	4.35494e+08	4.42207e+08	4.49009e+08	4.53691e+08	4.58461e+08	4.63143e+08	4.6809e+08	4.72771e+08	4.79043e+08	4.84873e+08	4.90085e+08	4.95297e+08	5.01039e+08	5.08901e+08	5.16674e+08	5.24006e+08	5.31073e+08	5.37786e+08
French companies2	intensity	FRA	Annual Report 2023; https://www.edf.fr/sites/groupe/files/2024-04/edf-urd-rapport-financier-annuel-2023-fr.pdf	Output in 2023													TRUE						0.0665804	0.081952	0.0757273	0.071521	0.0672553	0.0629847	0.0365546	0.03427	0.0319853	0.0304622	0.0289391	0.027416	0.0255883	0.0237605	0.0219328	0.0201051	0.0182773	0.0170588	0.0158403	0.0146219	0.0134034	0.0121849	0.0109664	0.00974791	0.00852942	0.00731093	0.00609244
French companies3	cumulative emissions	FRA	Annual Report 2022; https://www.edf.fr/sites/groupe/files/2023-03/edf-urd-rapport-financier-annuel-2022-fr.pdf	Output in 2022																			2.81435e+07	5.95148e+07	9.07977e+07	1.13878e+08	1.38486e+08	1.64625e+08	1.79879e+08	1.94367e+08	2.08105e+08	2.21371e+08	2.34168e+08	2.46478e+08	2.58087e+08	2.6898e+08	2.79138e+08	2.88549e+08	2.9719e+08	3.05362e+08	3.13043e+08	3.20209e+08	3.26847e+08	3.32953e+08	3.38533e+08	3.4357e+08	3.48039e+08	3.51922e+08	3.55198e+08
French companies4	SDA intensity	FRA	Annual Report 2021; https://www.edf.fr/sites/groupe/files/2022-03/edf-urd-rapport-financier-annuel-2021-fr-v2.pdf	Output in 2021				0.0665303															0.0665804	0.0865302	0.0760683	0.0920927	0.0765769	0.0634239	0.0589988	0.058407	0.0576638	0.057036	0.056335	0.055644	0.0548275	0.0540172	0.0532338	0.0524363	0.0516845	0.0408162	0.0302563	0.0199725	0.00990513	4.73734e-05	4.65239e-05	4.57082e-05	4.49548e-05	4.42444e-05	4.35815e-05
French companies5	SDA cumulative emissions	FRA	Annual Report 2020; https://www.edf.fr/sites/groupe/files/contrib/groupe-edf/espaces-dedies/espace-finance-fr/informations-financieres/informations-reglementees/urd/edf-urd-rapport-financier-annuel-2020-fr-hd.pdf	Output in 2020																			2.81435e+07	6.12673e+07	9.26911e+07	1.22409e+08	1.50429e+08	1.7675e+08	2.0137e+08	2.26063e+08	2.50829e+08	2.75667e+08	3.00579e+08	3.25564e+08	3.50439e+08	3.75203e+08	3.99858e+08	4.24403e+08	4.48838e+08	4.68391e+08	4.83061e+08	4.9285e+08	4.97755e+08	4.97779e+08	4.97803e+08	4.97827e+08	4.9785e+08	4.97874e+08	4.97897e+08
French companies6	marketshare	FRA	Annual Report 2017; https://www.edf.fr/sites/groupe/files/contrib/groupe-edf/espaces-dedies/espace-finance-fr/informations-financieres/informations-reglementees/document-de-reference/edf-ddr-2017-version-accessible-fr.pdf	Output in 2017																			0.88952	0.84243	0.885531	0.690711	0.78117	0.883355	0.883355	0.883355	0.883355	0.883355	0.883355	0.883355	0.883355	0.883355	0.883355	0.883355	0.883355	0.883355	0.883355	0.883355	0.883355	0.883355	0.883355	0.883355	0.883355	0.883355	0.883355
French companies7	my	FRA	Annual Report 2019;https://labrador.cld.bz/EDF-Document-d-enregistrement-universel-2019/16/	Output in 2019																			1	1.0559	1.00451	1.28783	1.1387	1.00698	1.00698	1.00698	1.00698	1.00698	1.00698	1.00698	1.00698	1.00698	1.00698	1.00698	1.00698	1.00698	1.00698	1.00698	1.00698	1.00698	1.00698	1.00698	1.00698	1.00698	1.00698
French companies8	consumes total budget Y/N?	FRA	EDF does not report its GHG emissions at the country level. Since it's production accounts for 88% of the country's electricity generation, the country's carbon intensity was used as a proxy for EDF's carbon intensity.																				FALSE	FALSE	FALSE	FALSE	FALSE	FALSE	FALSE	FALSE	FALSE	FALSE	FALSE	FALSE	FALSE	FALSE	FALSE	FALSE	FALSE	FALSE	FALSE	FALSE	FALSE	FALSE	FALSE	FALSE	FALSE	FALSE	FALSE
French companies9	Cumulative overshoot	FRA																					1	0.971395	0.979573	0.930301	0.92061	0.931401	0.893277	0.859794	0.829669	0.803036	0.779056	0.75708	0.736469	0.716892	0.698093	0.679895	0.662133	0.651939	0.64804	0.649709	0.656643	0.668876	0.680055	0.69014	0.699085	0.70685	0.713397
French companies10	CBD Cumulative emissions	FRA																					2.81435e+07	5.95148e+07	9.07977e+07	1.13878e+08	1.38486e+08	1.64625e+08	1.89074e+08	2.13596e+08	2.38191e+08	2.62857e+08	2.87597e+08	3.12408e+08	3.37111e+08	3.61704e+08	3.86188e+08	4.10563e+08	4.34829e+08	4.54246e+08	4.68815e+08	4.78536e+08	4.83408e+08	4.83432e+08	4.83455e+08	4.83479e+08	4.83503e+08	4.83526e+08	4.8355e+08
Taiwan Power Company	emissions in tCO2e (scope 1)	TWN	Taipower website; https://www.taipower.com.tw/2764/2826/2829/2834/25103/normalPost	Target on Net GHG emission intensity from thermal power used as a proxy for electricity generation.	2030;2050	Reduce net GHG emission intensity from thermal power units by 17% compared to 2016, net zero by 2050																		92670000	98130000	97820000	92880000	90780000	9.22085e+07	9.365e+07	9.5104e+07	9.65704e+07	9.80487e+07	9.95386e+07	9.61693e+07	9.26566e+07	8.89966e+07	8.51855e+07	8.1219e+07	7.70931e+07	7.28034e+07	6.83456e+07	6.37152e+07	5.89076e+07	5.39181e+07	4.8742e+07	4.33743e+07	3.781e+07	3.20439e+07
Taiwan Power Company1	output	TWN	Taipower website; https://www.taipower.com.tw/2764/2826/2829/2834/25103/normalPost	Output from 2020 to 2024																				183900000	189100000	188300000	174500000	172100000	176574600	1.81166e+08	1.85876e+08	1.90709e+08	1.95667e+08	2.00754e+08	2.04167e+08	2.07638e+08	2.11168e+08	2.14758e+08	2.18409e+08	2.22122e+08	2.25898e+08	2.29738e+08	2.33643e+08	2.37615e+08	2.41655e+08	2.45763e+08	2.49941e+08	2.5419e+08	2.58511e+08
Taiwan Power Company2	intensity	TWN	Sustainability Report 2024; https://www.taipower.com.tw/mag/Sustainability_en/2024Sustainability.pdf	Emissions from thermal generation in 2024, 2023, and 2022													TRUE							0.503915	0.518932	0.51949	0.532264	0.527484	0.522207	0.51693	0.511654	0.506377	0.5011	0.495823	0.471032	0.446241	0.42145	0.396658	0.371867	0.347076	0.322285	0.297494	0.272703	0.247912	0.22312	0.198329	0.173538	0.148747	0.123956
Taiwan Power Company3	cumulative emissions	TWN	Sustainability Report 2022; https://www.taipower.com.tw/mag/Sustainability_en/2022Sustainability.pdf	Emissions from thermal generation in 2021 and 2020																				92670000	190800000	288620000	381500000	472280000	5.64489e+08	6.58138e+08	7.53243e+08	8.49813e+08	9.47862e+08	1.0474e+09	1.14357e+09	1.23623e+09	1.32522e+09	1.41041e+09	1.49163e+09	1.56872e+09	1.64152e+09	1.70987e+09	1.77358e+09	1.83249e+09	1.88641e+09	1.93515e+09	1.97853e+09	2.01634e+09	2.04838e+09
Taiwan Power Company4	SDA intensity	TWN						0.503915																0.503915	0.464777	0.441364	0.448872	0.427354	0.38945	0.357862	0.327624	0.298689	0.271011	0.244543	0.228387	0.212704	0.19748	0.182707	0.168372	0.155293	0.142604	0.130296	0.118359	0.106786	0.0990659	0.0915743	0.0843055	0.0772541	0.0704149
Taiwan Power Company5	SDA cumulative emissions	TWN																						92670000	1.80559e+08	2.63668e+08	3.41996e+08	4.15544e+08	4.84311e+08	5.49143e+08	6.10041e+08	6.67003e+08	7.20031e+08	7.69124e+08	8.15753e+08	8.59919e+08	9.0162e+08	9.40858e+08	9.77632e+08	1.01213e+09	1.04434e+09	1.07427e+09	1.10193e+09	1.1273e+09	1.15124e+09	1.17375e+09	1.19482e+09	1.21446e+09	1.23266e+09
Taiwan Power Company6	marketshare	TWN																						0.677972	0.679476	0.659456	0.59564	0.572561	0.572561	0.572561	0.572561	0.572561	0.572561	0.572561	0.572561	0.572561	0.572561	0.572561	0.572561	0.572561	0.572561	0.572561	0.572561	0.572561	0.572561	0.572561	0.572561	0.572561	0.572561
Taiwan Power Company7	my	TWN																						1	0.997786	1.02808	1.13823	1.18411	1.18411	1.18411	1.18411	1.18411	1.18411	1.18411	1.18411	1.18411	1.18411	1.18411	1.18411	1.18411	1.18411	1.18411	1.18411	1.18411	1.18411	1.18411	1.18411	1.18411	1.18411
Taiwan Power Company8	consumes total budget Y/N?	TWN																						FALSE	FALSE	FALSE	FALSE	FALSE	FALSE	FALSE	FALSE	FALSE	FALSE	FALSE	FALSE	FALSE	TRUE	TRUE	TRUE	TRUE	TRUE	TRUE	TRUE	TRUE	TRUE	TRUE	TRUE	TRUE	TRUE
Taiwan Power Company9	Cumulative overshoot	TWN																						1	1.05672	1.09463	1.11551	1.13653	1.16555	1.19848	1.23474	1.27408	1.31642	1.36181	1.40186	1.43761	1.46982	1.49907	1.52576	1.54993	1.57183	1.59165	1.60953	1.62556	1.63859	1.6487	1.65592	1.66028	1.66176
Taiwan Power Company10	CBD Cumulative emissions	TWN																						1.0734e+08	2.09368e+08	3.03004e+08	3.82713e+08	4.54658e+08	5.21927e+08	5.85346e+08	6.44916e+08	7.00638e+08	7.5251e+08	8.00533e+08	8.46146e+08	8.89349e+08	9.30142e+08	9.68524e+08	1.0045e+09	1.03824e+09	1.06975e+09	1.09903e+09	1.12608e+09	1.1509e+09	1.17432e+09	1.19634e+09	1.21695e+09	1.23616e+09	1.25397e+09
Taiwanese companies	emissions in tCO2e (scope 1)	TWN	Taipower website; https://www.taipower.com.tw/2764/2826/2829/2834/25103/normalPost	Target on Net GHG emission intensity from thermal power used as a proxy for electricity generation.	2030;2050	Reduce net GHG emission intensity from thermal power units by 17% compared to 2016, net zero by 2050																		92670000	98130000	97820000	92880000	90780000	9.22085e+07	9.365e+07	9.5104e+07	9.65704e+07	9.80487e+07	9.95386e+07	9.61693e+07	9.26566e+07	8.89966e+07	8.51855e+07	8.1219e+07	7.70931e+07	7.28034e+07	6.83456e+07	6.37152e+07	5.89076e+07	5.39181e+07	4.8742e+07	4.33743e+07	3.781e+07	3.20439e+07
Taiwanese companies1	output	TWN	Taipower website; https://www.taipower.com.tw/2764/2826/2829/2834/25103/normalPost	Output from 2020 to 2024																				183900000	189100000	188300000	174500000	172100000	176574600	1.81166e+08	1.85876e+08	1.90709e+08	1.95667e+08	2.00754e+08	2.04167e+08	2.07638e+08	2.11168e+08	2.14758e+08	2.18409e+08	2.22122e+08	2.25898e+08	2.29738e+08	2.33643e+08	2.37615e+08	2.41655e+08	2.45763e+08	2.49941e+08	2.5419e+08	2.58511e+08
Taiwanese companies2	intensity	TWN	Sustainability Report 2024; https://www.taipower.com.tw/mag/Sustainability_en/2024Sustainability.pdf	Emissions from thermal generation in 2024, 2023, and 2022													TRUE							0.503915	0.518932	0.51949	0.532264	0.527484	0.522207	0.51693	0.511654	0.506377	0.5011	0.495823	0.471032	0.446241	0.42145	0.396658	0.371867	0.347076	0.322285	0.297494	0.272703	0.247912	0.22312	0.198329	0.173538	0.148747	0.123956
Taiwanese companies3	cumulative emissions	TWN	Sustainability Report 2022; https://www.taipower.com.tw/mag/Sustainability_en/2022Sustainability.pdf	Emissions from thermal generation in 2021 and 2020																				92670000	190800000	288620000	381500000	472280000	5.64489e+08	6.58138e+08	7.53243e+08	8.49813e+08	9.47862e+08	1.0474e+09	1.14357e+09	1.23623e+09	1.32522e+09	1.41041e+09	1.49163e+09	1.56872e+09	1.64152e+09	1.70987e+09	1.77358e+09	1.83249e+09	1.88641e+09	1.93515e+09	1.97853e+09	2.01634e+09	2.04838e+09
Taiwanese companies4	SDA intensity	TWN						0.503915																0.503915	0.464777	0.441364	0.448872	0.427354	0.38945	0.357862	0.327624	0.298689	0.271011	0.244543	0.228387	0.212704	0.19748	0.182707	0.168372	0.155293	0.142604	0.130296	0.118359	0.106786	0.0990659	0.0915743	0.0843055	0.0772541	0.0704149
Taiwanese companies5	SDA cumulative emissions	TWN																						92670000	1.80559e+08	2.63668e+08	3.41996e+08	4.15544e+08	4.84311e+08	5.49143e+08	6.10041e+08	6.67003e+08	7.20031e+08	7.69124e+08	8.15753e+08	8.59919e+08	9.0162e+08	9.40858e+08	9.77632e+08	1.01213e+09	1.04434e+09	1.07427e+09	1.10193e+09	1.1273e+09	1.15124e+09	1.17375e+09	1.19482e+09	1.21446e+09	1.23266e+09
Taiwanese companies6	marketshare	TWN																						0.677972	0.679476	0.659456	0.59564	0.572561	0.572561	0.572561	0.572561	0.572561	0.572561	0.572561	0.572561	0.572561	0.572561	0.572561	0.572561	0.572561	0.572561	0.572561	0.572561	0.572561	0.572561	0.572561	0.572561	0.572561	0.572561
Taiwanese companies7	my	TWN																						1	0.997786	1.02808	1.13823	1.18411	1.18411	1.18411	1.18411	1.18411	1.18411	1.18411	1.18411	1.18411	1.18411	1.18411	1.18411	1.18411	1.18411	1.18411	1.18411	1.18411	1.18411	1.18411	1.18411	1.18411	1.18411
Taiwanese companies8	consumes total budget Y/N?	TWN																						FALSE	FALSE	FALSE	FALSE	FALSE	FALSE	FALSE	FALSE	FALSE	FALSE	FALSE	FALSE	FALSE	TRUE	TRUE	TRUE	TRUE	TRUE	TRUE	TRUE	TRUE	TRUE	TRUE	TRUE	TRUE	TRUE
Taiwanese companies9	Cumulative overshoot	TWN																						1	1.05672	1.09463	1.11551	1.13653	1.16555	1.19848	1.23474	1.27408	1.31642	1.36181	1.40186	1.43761	1.46982	1.49907	1.52576	1.54993	1.57183	1.59165	1.60953	1.62556	1.63859	1.6487	1.65592	1.66028	1.66176
Taiwanese companies10	CBD Cumulative emissions	TWN																						1.0734e+08	2.09368e+08	3.03004e+08	3.82713e+08	4.54658e+08	5.21927e+08	5.85346e+08	6.44916e+08	7.00638e+08	7.5251e+08	8.00533e+08	8.46146e+08	8.89349e+08	9.30142e+08	9.68524e+08	1.0045e+09	1.03824e+09	1.06975e+09	1.09903e+09	1.12608e+09	1.1509e+09	1.17432e+09	1.19634e+09	1.21695e+09	1.23616e+09	1.25397e+09
World	emissions in tCO2e (scope 1)	World
World1	output	World
World2	intensity	World
World3	cumulative emissions	World
World4	SDA intensity	World						-0.268
World5	SDA cumulative emissions	World
World6	marketshare	World
World7	my	World
World8	consumes total budget Y/N?	World
World9	Cumulative overshoot	World
World10	CBD Cumulative emissions	World
MEX	1
POL	5
CAN	6
MYS	3
PHL	4
ZAF	1
IND	3
GBR	4
AUS	4
SBR	1
KOR	1
[truncated: 102 more columns]

## Sheet: Pathways
1	2	3	4	5	6	7	8	9	10	11	12	13	14	15	16	17	18	19	20	21	22	23	24	25	26	27	28	29	30	31	32	33	34	35	36	37	38	39	40	41	42	43	44	45	46	47	48
Indicator	Category	Geography	Code	Group	Benchmark										2019	2020	2021	2022	2023	2024	2025	2026	2027	2028	2029	2030	2031	2032	2033	2034	2035	2036	2037	2038	2039	2040	2041	2042	2043	2044	2045	2046	2047	2048	2049	2050	Key metric
Emissions in tCO2	1.5G	Global	Emissions in tCO21.5GGlobal												13800000000	13500000000	1.34807e+10	1.34076e+10	13688486658	1.3195e+10	1.25863e+10	1.18623e+10	1.10231e+10	1.00686e+10	8.99884e+09	7.74133e+09	6.92971e+09	5.99868e+09	4.94826e+09	3.77842e+09	2489181758	2.11929e+09	1.7052e+09	1.24689e+09	7.44384e+08	1.97668e+08	1.56663e+08	1.12982e+08	6.66246e+07	1.75912e+07	-3.41183e+07	-8.85038e+07	-1.45565e+08	-2.05303e+08	-2.67717e+08	-3.32807e+08
Electricity in MWh	1.5G	Global	Electricity in MWh1.5GGlobal												26935695000	26744640000	27944900000	29145160000	29863400000	3.13831e+10	3.29027e+10	3.44224e+10	3.5942e+10	3.74617e+10	3.89813e+10	39782750000	41843028000	43903306000	45963584000	48023862000	50084140000	52460314000	54836488000	57212662000	59588836000	61965010000	63787948000	65610886000	67433824000	69256762000	71079700000	72902638000	74725576000	76548514000	78371452000	80194390000
Intensity in tCO2e per MWh	1.5	Global	Intensity in tCO2e per MWh1.5Global		1.5 Global										0.512331	0.504774	0.482402	0.46003	0.45837	0.42045	0.38253	0.34461	0.30669	0.26877	0.23085	0.19459	0.165612	0.136634	0.107656	0.078678	0.0497	0.040398	0.031096	0.021794	0.012492	0.00319	0.002456	0.001722	0.000988	0.000254	-0.00048	-0.001214	-0.001948	-0.002682	-0.003416	-0.00415
Py (2022-2050)	1.5G	Global	Py (2022-2050)1.5GGlobal	G11														1	0.996424	0.914731	0.833039	0.751346	0.669654	0.587962	0.506269	0.428153	0.365725	0.303296	0.240868	0.178439	0.116011	0.0959714	0.0759318	0.0558921	0.0358525	0.0158128	0.0142315	0.0126503	0.011069	0.0094877	0.00790642	0.00632513	0.00474385	0.00316257	0.00158128	0	3.47773
Py (2021-2050)	1.5G	Global	Py (2021-2050)1.5GGlobal	G2													1	0.954019	0.950608	0.872671	0.794735	0.716799	0.638863	0.560927	0.48299	0.408466	0.348908	0.28935	0.229792	0.170235	0.110677	0.0915586	0.0724404	0.0533222	0.0342039	0.0150857	0.0135772	0.0120686	0.01056	0.00905145	0.00754287	0.0060343	0.00452572	0.00301715	0.00150857	0	3.94895
Py (2020-2050)	1.5G	Global	Py (2020-2050)1.5GGlobal	G7												1	0.956041	0.912081	0.908819	0.834309	0.759799	0.685289	0.610779	0.536269	0.461758	0.39051	0.33357	0.276631	0.219691	0.162751	0.105811	0.0875337	0.0692559	0.0509781	0.0327004	0.0144226	0.0129803	0.0115381	0.0100958	0.00865355	0.00721129	0.00576903	0.00432678	0.00288452	0.00144226	0	4.44253
Py (2019-2050)	1.5G	Global	Py (2019-2050)1.5GGlobal	G4											1	0.985368	0.942052	0.898735	0.895521	0.822101	0.748681	0.675262	0.601842	0.528422	0.455002	0.384796	0.32869	0.272583	0.216476	0.16037	0.104263	0.0862529	0.0682425	0.0502322	0.0322219	0.0142115	0.0127904	0.0113692	0.00994808	0.00852693	0.00710577	0.00568462	0.00426346	0.00284231	0.00142115	0	4.95109
Py (2019-2038)	1.5G	Global	Py (2019-2038)1.5GGlobal	G8											1	0.984594	0.938987	0.89338	0.889995	0.812693	0.73539	0.658087	0.580784	0.503481	0.426178	0.352259	0.293185	0.234111	0.175037	0.115963	0.0568886	0.0379258	0.0189629	0													4.9309
Py (2019-2037)	1.5G	Global	Py (2019-2037)1.5GGlobal	G9											1	0.984296	0.937807	0.891319	0.887869	0.809072	0.730275	0.651478	0.57268	0.493883	0.415086	0.339738	0.279522	0.219306	0.159091	0.0988747	0.0386588	0.0193294	0														4.90446
Py (2019-2030)	1.5G	Global	Py (2019-2030)1.5GGlobal	G5											1	0.976216	0.905806	0.835397	0.830172	0.71083	0.591487	0.472145	0.352803	0.23346	0.114118	0																					4.21294
Py (2021-2030)	1.5G	Global	Py (2021-2030)1.5GGlobal	G1													1	0.922269	0.916501	0.784748	0.652996	0.521243	0.38949	0.257738	0.125985	0																					3.2108
Py (2021-2040)	1.5G	Global	Py (2021-2040)1.5GGlobal	G10													1	0.953315	0.949851	0.870721	0.791591	0.712461	0.633331	0.554201	0.475072	0.399406	0.338936	0.278465	0.217995	0.157525	0.0970552	0.0776441	0.0582331	0.0388221	0.019411	0											3.95375
Py (2020-2040)	1.5G	Global	Py (2020-2040)1.5GGlobal	G6												1	0.955397	0.910795	0.907485	0.831885	0.756284	0.680684	0.605083	0.529483	0.453882	0.381591	0.323818	0.266045	0.208272	0.150499	0.0927262	0.074181	0.0556357	0.0370905	0.0185452	0											4.44733
Py (2020-2032)	1.5G	Global	Py (2020-2032)1.5GGlobal	G3												1	0.93923	0.878459	0.87395	0.770946	0.667941	0.564937	0.461933	0.358929	0.255924	0.157429	0.0787146	0																			4.03561
Yearly growth physical output	1.5G	Global	Yearly growth physical output1.5GGlobal															1.04295	1.02464	1.05089	1.04842	1.04619	1.04415	1.04228	1.04057	1.02056	1.05179	1.04924	1.04693	1.04482	1.0429	1.04744	1.04529	1.04333	1.04153	1.03988	1.02942	1.02858	1.02778	1.02703	1.02632	1.02565	1.02501	1.0244	1.02381	1.02326
Emissions in tCO2e	NTP	AUS	Emissions in tCO2eNTPAUS														1.55402e+08	1.5124e+08	1.45697e+08	1.48056e+08	1.39609e+08	1.2682e+08	1.14031e+08	1.01241e+08	8.84519e+07	7.56625e+07	6.48745e+07	5.40865e+07	4.32985e+07	3.25105e+07	2.17225e+07	2.06485e+07	1.95746e+07	1.85007e+07	1.74268e+07	1.63529e+07	1.56206e+07	1.48884e+07	1.41562e+07	1.3424e+07	1.26918e+07	1.19107e+07	1.11297e+07	1.03487e+07	9.56764e+06	8.78661e+06
Electricity in MWh	NTP	AUS	Electricity in MWhNTPAUS														2.60988e+08	2.66326e+08	2.66511e+08	2.73137e+08	2.61699e+08	2.69477e+08	2.79542e+08	2.9098e+08	3.01503e+08	3.31699e+08	3.5732e+08	3.76536e+08	3.93922e+08	4.21373e+08	4.45621e+08	5.31634e+08	6.28627e+08	6.84444e+08	700000000	5.31634e+08	5.51033e+08	5.70431e+08	5.8983e+08	6.09229e+08	6.28627e+08	6.39791e+08	6.50954e+08	6.62118e+08	6.73281e+08	6.84444e+08
Intensity in tCO2e per MWh	NTP	AUS	Intensity in tCO2e per MWhNTPAUS		NTP AUS												0.595436	0.567875	0.546682	0.542057	0.533473	0.470615	0.407919	0.347932	0.29337	0.228106	0.181558	0.143642	0.109916	0.0771537	0.0487465	0.0388398	0.0311387	0.0270302	0.0248954	0.0307596	0.0283479	0.0261003	0.0240005	0.0220344	0.0201897	0.0186166	0.0170975	0.0156297	0.0142105	0.0128376	5.14207
Py starting in 2024	NTP	AUS	Py starting in 2024NTPAUS														1	0.952692	0.916316	0.908378	0.893643	0.785752	0.678137	0.575171	0.481518	0.369496	0.2896	0.224519	0.166631	0.110395	0.0616358	0.0446314	0.0314128	0.024361	0.0206966	0.0307622	0.0266227	0.0227647	0.0191605	0.0157859	0.0126195	0.00991941	0.00731197	0.00479246	0.0023565	0
Yearly growth physical output	NTP	AUS	Yearly growth physical outputNTPAUS														1.00867	1.02045	1.0007	1.02486	0.958124	1.02972	1.03735	1.04092	1.03616	1.10015	1.07724	1.05378	1.04617	1.06969	1.05755	1.19302	1.18244	1.08879	1.02273	0.759477	1.03649	1.0352	1.03401	1.03289	1.03184	1.01776	1.01745	1.01715	1.01686	1.01658
Emissions in tCO2e	NTP	GBR	Emissions in tCO2eNTPGBR														6.18998e+07	6.02087e+07	4.86169e+07	4.3418e+07	3.8599e+07	3.41239e+07	2.97172e+07	2.53174e+07	2.06133e+07	1.57581e+07
Electricity in MWh	NTP	GBR	Electricity in MWhNTPGBR														3.07439e+08	3.20475e+08	2.8431e+08	2.82459e+08	2.82924e+08	2.86412e+08	2.91754e+08	2.99361e+08	3.06355e+08	3.15163e+08
Intensity in tCO2e per MWh	NTP	GBR	Intensity in tCO2e per MWhNTPGBR		NTP GBR												0.20134	0.187874	0.171	0.153714	0.136429	0.119143	0.101857	0.0845714	0.0672857	0.05																					1.14754
Py starting in 2020	NTP	GBR	Py starting in 2020NTPGBR														1	0.911016	0.799522	0.685305	0.571087	0.45687	0.342652	0.228435	0.114217	0
Yearly growth physical output	NTP	GBR	Yearly growth physical outputNTPGBR														0.981836	1.0424	0.887151	0.993492	1.00165	1.01233	1.01865	1.02607	1.02336	1.02875
Emissions in tCO2e	NTP	IRL	Emissions in tCO2eNTPIRL													0	9980000	8.99333e+06	8.00667e+06	7.00333e+06	6000000	5.2233e+06	4.54715e+06	3.95852e+06	3.4461e+06	3000000
Electricity in MWh	NTP	IRL	Electricity in MWhNTPIRL													30800000	32100000	3.33e+07	34700000	35800000	36400000	37500000	38400000	39300000	40100000	40900000
Intensity in tCO2e per MWh	NTP	IRL	Intensity in tCO2e per MWhNTPIRL		NTP IRL												0.310903	0.27007	0.23074	0.195624	0.164835	0.139288	0.118415	0.100726	0.0859375	0.0733496
Py starting in 2021	NTP	IRL	Py starting in 2021NTPIRL														1	0.828109	0.662545	0.514722	0.385115	0.277573	0.189707	0.115242	0.0529897	0
Yearly growth physical output	NTP	IRL	Yearly growth physical outputNTPIRL													0	1.04221	1.03738	1.04204	1.0317	1.01676	1.03022	1.024	1.02344	1.02036	1.01995
Emissions in tCO2e	NTP	CAN	Emissions in tCO2eNTPCAN														51680000	55400000	53110000	45370000	34980000	35190000	35830000	36190000	3.331e+07	27550000	17030000	7510000	5960000	790000	-6180000	-8.38e+06	-10620000	-12810000	-14870000	-16480000	-18450000	-20200000	-22160000	-24350000	-26470000	-28280000	-30100000	-31880000	-33640000	-35440000		99590000
Electricity in MWh	NTP	CAN	Electricity in MWhNTPCAN														6.25721e+08	6.45417e+08	645027880	658905680	6.69607e+08	687434300	708980120	7.30805e+08	756558030	783585000	816888920	847211230	875753190	907945910	936600240	968326300	9.9939e+08	1.0311e+09	1063375540	1.09531e+09	1.13126e+09	1.16165e+09	1.19094e+09	1219094850	1244339760	1.26955e+09	1.29324e+09	1315898710	1338053500	1.35972e+09
Intensity in tCO2e per MWh	NTP	CAN	Intensity in tCO2e per MWhNTPCAN		NTP CAN												0.0825927	0.0858359	0.0823375	0.0688566	0.0522396	0.0511903	0.0505374	0.0495208	0.0440283	0.0351589	0.0208474	0.00886438	0.00680557	0.000870096	-0.00659833	-0.00865411	-0.0106265	-0.0124236	-0.0139838	-0.015046	-0.0163092	-0.0173891	-0.0186072	-0.0199738	-0.0212723	-0.0222756	-0.0232749	-0.0242268	-0.025141	-0.0260643	0.329555
Py starting in 2021	NTP	CAN	Py starting in 2021NTPCAN														1	1.02985	0.997652	0.873583	0.720652	0.710996	0.704986	0.69563	0.645082	0.563454	0.431741	0.321458	0.30251	0.247884	0.17915	0.16023	0.142078	0.125539	0.11118	0.101404	0.0897786	0.0798403	0.0686299	0.0560519	0.0441015	0.0348685	0.0256711	0.0169108	0.00849708	0
Yearly growth physical output	NTP	CAN	Yearly growth physical outputNTPCAN														0.980232	1.03148	0.999397	1.02152	1.01624	1.02662	1.03134	1.03078	1.03524	1.03572	1.0425	1.03712	1.03369	1.03676	1.03156	1.03387	1.03208	1.03173	1.0313	1.03003	1.03283	1.02686	1.02521	1.02364	1.02071	1.02026	1.01866	1.01752	1.01684	1.01619
Emissions in tCO2	NTP	IND	Emissions in tCO2NTPIND													928140000	910010000	1002000000	1013000000	1024000000	1035000000	1046000000	1057000000	1065600000	1074200000	1082800000	1091400000	1100000000
Electricity in MWh	NTP	IND	Electricity in MWhNTPIND													1.30724e+09	1.30001e+09	1.41127e+09	1.49498e+09	1.5871e+09	1.68897e+09	1.80221e+09	1.92883e+09	2.03204e+09	2.14497e+09	2.26907e+09	2.40608e+09	2.55814e+09
Intensity in tCO2e per MWh	NTP	IND	Intensity in tCO2e per MWhNTPIND		NTP IND											0.71	0.7	0.71	0.6776	0.6452	0.6128	0.5804	0.548	0.5244	0.5008	0.4772	0.4536	0.43																			7
Py starting in 2020	NTP	IND	Py starting in 2020NTPIND													1	0.964286	1	0.884286	0.768571	0.652857	0.537143	0.421429	0.337143	0.252857	0.168571	0.0842857	0
Yearly growth physical output	NTP	IND	Yearly growth physical outputNTPIND													0	0.994473	1.08558	1.05932	1.06162	1.06418	1.06704	1.07026	1.05351	1.05558	1.05786	1.06038	1.0632
Emissions in tCO2	NTP	ZAF	Emissions in tCO2NTPZAF														1.77551e+08	1.70054e+08	1.61824e+08	1.69409e+08	177350000	165850000	157720000	157950000	148950000	124730000	118493500	112257000	106020500	99784000	93547500	87311000	81074500	74838000	68601500	62365000	56128500	49892000	43655500	37419000	31182500	24946000	18709500	12473000	6236500	0
Electricity in MWh	NTP	ZAF	Electricity in MWhNTPZAF														2.17081e+08	2.12114e+08	2.07547e+08	2.17526e+08	2.27984e+08	2.29196e+08	2.30632e+08	2.31465e+08	2.33294e+08	2.36244e+08	2.40249e+08	2.4523e+08	2.50438e+08	2.57121e+08	2.65334e+08	2.72994e+08	2.81879e+08	2.91866e+08	3.01852e+08	3.11825e+08	3.20423e+08	3.29008e+08	3.37627e+08	3.46223e+08	3.5482e+08	3.63544e+08	3.72233e+08	3.80932e+08	3.89643e+08	3.98344e+08
Intensity in tCO2e per MWh	NTP	ZAF	Intensity in tCO2e per MWhNTPZAF		NTP ZAF												0.8179	0.801708	0.779699	0.778802	0.777906	0.723618	0.683859	0.682392	0.638464	0.527972	0.493211	0.457761	0.42334	0.388082	0.352566	0.319828	0.287621	0.256412	0.227269	0.2	0.17517	0.151644	0.129301	0.108078	0.0878826	0.068619	0.0502629	0.0327434	0.0160057	0	11.0292
Py starting in 2025	NTP	ZAF	Py starting in 2025NTPZAF														1	0.980202	0.953293	0.952197	0.951101	0.884726	0.836115	0.834321	0.780614	0.645521	0.60302	0.559678	0.517594	0.474485	0.431062	0.391035	0.351658	0.313501	0.277869	0.244528	0.21417	0.185406	0.158089	0.13214	0.107449	0.0838965	0.0614536	0.0400334	0.0195692	0
Yearly growth physical output	NTP	ZAF	Yearly growth physical outputNTPZAF														#DIV/0!	0.977119	0.978468	1.04808	1.04808	1.00532	1.00627	1.00361	1.0079	1.01264	1.01696	1.02073	1.02123	1.02669	1.03194	1.02887	1.03255	1.03543	1.03421	1.03304	1.02757	1.02679	1.0262	1.02546	1.02483	1.02459	1.0239	1.02337	1.02287	1.02233
Emissions in tCO2	NTP	PHL	Emissions in tCO2NTPPHL												6.65215e+07	6.44996e+07	6.71249e+07	7.11475e+07	75710000	76220000	78160000	80610000	84290000	88270000	89080000	89900000	90650000	91420000	92010000	92670000	93480000	94260000	95000000	95660000	96080000	96770000	98690000	101010000	103200000	105550000	108080000	110670000	113420000	117040000	119140000	122160000
Electricity in MWh	NTP	PHL	Electricity in MWhNTPPHL												1.03878e+08	9.96847e+07	1.03603e+08	1.09256e+08	114390000	122020000	1.2826e+08	135400000	143230000	151850000	161150000	170350000	179560000	188700000	198630000	208850000	220290000	231570000	244560000	257200000	269310000	286310000	300560000	315490000	330930000	345720000	363650000	381780000	399810000	417930000	436190000	453810000
Intensity in tCO2e per MWh	NTP	PHL	Intensity in tCO2e per MWhNTPPHL		NTP PHL										0.640382	0.647036	0.647902	0.651198	0.661859	0.624652	0.609387	0.595347	0.588494	0.581297	0.552777	0.527737	0.504845	0.484473	0.463223	0.443716	0.42435	0.407048	0.388453	0.371928	0.356764	0.33799	0.328354	0.320169	0.311848	0.305305	0.297209	0.289879	0.283685	0.280047	0.273138	0.269188	14.0149
Py starting in 2023	NTP	PHL	Py starting in 2023NTPPHL												1	1.01793	1.02026	1.02914	1.05786	0.957622	0.916499	0.878675	0.860213	0.840825	0.763991	0.696533	0.634863	0.579979	0.522733	0.470179	0.418008	0.371395	0.321301	0.276784	0.23593	0.185355	0.159394	0.137343	0.114929	0.0973002	0.0754895	0.0557428	0.0390555	0.0292551	0.0106421	0
Yearly growth physical output	NTP	PHL	Yearly growth physical outputNTPPHL												#DIV/0!	0.959634	1.03931	1.05456	1.04699	1.0667	1.05114	1.05567	1.05783	1.06018	1.06124	1.05709	1.05407	1.0509	1.05262	1.05145	1.05478	1.05121	1.0561	1.05168	1.04708	1.06312	1.04977	1.04967	1.04894	1.04469	1.05186	1.04986	1.04723	1.04532	1.04369	1.0404
Emissions in tCO2	NTP	MYS	Emissions in tCO2NTPMYS												110000000	1.09667e+08	1.09333e+08	1.09e+08	1.08667e+08	1.08333e+08	108000000	106200000	104400000	102600000	100800000	99000000
Electricity in MWh	NTP	MYS	Electricity in MWhNTPMYS												178500000	181623750	1.84802e+08	1.88036e+08	1.91327e+08	1.94675e+08	1.98082e+08	2.01548e+08	2.05075e+08	2.08664e+08	2.12316e+08	2.16031e+08
Intensity in tCO2e per MWh	NTP	MYS	Intensity in tCO2e per MWhNTPMYS		NTP MYS										0.616246	0.603812	0.591624	0.579676	0.567964	0.556483	0.545229	0.526921	0.509081	0.491699	0.474764	0.458267																					5.98451
Py starting in 2019	NTP	MYS	Py starting in 2019NTPMYS												1	0.921293	0.844139	0.768509	0.694372	0.621701	0.550465	0.434575	0.321651	0.211624	0.104429	0
Yearly growth physical output	NTP	MYS	Yearly growth physical outputNTPMYS												#DIV/0!	1.0175	1.0175	1.0175	1.0175	1.0175	1.0175	1.0175	1.0175	1.0175	1.0175	1.0175
Emissions in tCO2	NTP	POL	Emissions in tCO2NTPPOL													9.55946e+07	9.56607e+07	9.56981e+07	9.57069e+07	9.5687e+07	9.56384e+07	9.51603e+07	9.46312e+07	9.40511e+07	9.342e+07	9.2738e+07	8.8633e+07	8.44109e+07	8.00716e+07	7.56151e+07	7.10415e+07	6.90718e+07	6.70332e+07	6.49256e+07	6.27491e+07	6.05036e+07
Electricity in MWh	NTP	POL	Electricity in MWhNTPPOL													1.767e+08	1.78939e+08	1.81178e+08	1.83417e+08	1.85656e+08	1.87895e+08	1.90549e+08	1.93204e+08	1.95858e+08	1.98513e+08	2.01167e+08	2.03473e+08	2.0578e+08	2.08086e+08	2.10393e+08	2.12699e+08	2.15311e+08	2.17923e+08	2.20535e+08	2.23148e+08	2.2576e+08
Intensity in tCO2e per MWh	NTP	POL	Intensity in tCO2e per MWhNTPPOL		NTP POL											0.541	0.5346	0.5282	0.5218	0.5154	0.509	0.4994	0.4898	0.4802	0.4706	0.461	0.4356	0.4102	0.3848	0.3594	0.334	0.3208	0.3076	0.2944	0.2812	0.268											8.5425
Py starting in 2020	NTP	POL	Py starting in 2020NTPPOL													1	0.976557	0.953114	0.92967	0.906227	0.882784	0.847619	0.812454	0.777289	0.742125	0.70696	0.613919	0.520879	0.427839	0.334799	0.241758	0.193407	0.145055	0.0967033	0.0483516	0
Yearly growth physical output	NTP	POL	Yearly growth physical outputNTPPOL													#DIV/0!	1.01267	1.01251	1.01236	1.01221	1.01206	1.01413	1.01393	1.01374	1.01355	1.01337	1.01147	1.01134	1.01121	1.01108	1.01096	1.01228	1.01213	1.01199	1.01184	1.01171
Emissions in tCO2	NTP	MEX	Emissions in tCO2NTPMEX													1.46532e+08	1.44292e+08	1.41929e+08	1.39444e+08	1.36837e+08	1.34108e+08	1.23676e+08	1.12849e+08	1.01629e+08	9.00141e+07	7.80055e+07	7.62972e+07	7.44173e+07	7.23658e+07	7.01427e+07	6.7748e+07	6.62938e+07	6.45302e+07	6.24573e+07	6.0075e+07	5.73833e+07	5.59108e+07	5.40058e+07	5.16684e+07	4.88985e+07	4.56961e+07	4.16256e+07	3.72366e+07	3.25292e+07	2.75034e+07	2.21592e+07
Electricity in MWh	NTP	MEX	Electricity in MWhNTPMEX													3.31943e+08	3.36685e+08	3.41427e+08	3.46169e+08	3.50911e+08	3.55653e+08	3.61317e+08	3.66981e+08	3.72645e+08	3.7831e+08	3.83974e+08	3.93326e+08	4.02678e+08	4.12031e+08	4.21383e+08	4.30735e+08	4.47596e+08	4.64457e+08	4.81317e+08	4.98178e+08	5.15038e+08	5.41515e+08	5.67991e+08	5.94468e+08	6.20944e+08	6.4742e+08	6.66915e+08	6.86411e+08	7.05906e+08	7.25401e+08	7.44896e+08
Intensity in tCO2e per MWh	NTP	MEX	Intensity in tCO2e per MWhNTPMEX		NTP MEX											0.441439	0.428566	0.415693	0.402821	0.389948	0.377075	0.342291	0.307506	0.272722	0.237938	0.203153	0.193979	0.184806	0.175632	0.166458	0.157284	0.148111	0.138937	0.129763	0.120589	0.111416	0.103249	0.0950821	0.0869154	0.0787486	0.0705819	0.0624151	0.0542483	0.0460816	0.0379148	0.029748	5.77552
Py starting in 2020	NTP	MEX	Py starting in 2020NTPMEX													1	0.968732	0.937464	0.906196	0.874928	0.84366	0.759169	0.674677	0.590186	0.505694	0.421203	0.398919	0.376636	0.354353	0.33207	0.309787	0.287504	0.265221	0.242938	0.220654	0.198371	0.178534	0.158697	0.13886	0.119023	0.0991856	0.0793485	0.0595114	0.0396743	0.0198371	0
Yearly growth physical output	NTP	MEX	Yearly growth physical outputNTPMEX													0.940287	1.01429	1.01408	1.01389	1.0137	1.01351	1.01593	1.01568	1.01543	1.0152	1.01497	1.02436	1.02378	1.02323	1.0227	1.02219	1.03914	1.03767	1.0363	1.03503	1.03384	1.05141	1.04889	1.04661	1.04454	1.04264	1.03011	1.02923	1.0284	1.02762	1.02687
Emissions in tCO2	NTP	SRB	Emissions in tCO2NTPSRB												3.38204e+07	34548000	33123600	31699200	30274800	28850400	2.7426e+07	2.7426e+07	2.7426e+07	2.7426e+07	2.7426e+07	2.7426e+07	2.64345e+07	2.5443e+07	2.44515e+07	2.346e+07	2.24685e+07	2.1477e+07	2.04855e+07	1.9494e+07	1.85025e+07	1.7511e+07	1.65195e+07	1.5528e+07	1.45365e+07	1.3545e+07	1.25535e+07	1.1562e+07	1.05705e+07	9.579e+06	8.5875e+06	7596000
Electricity in MWh	NTP	SRB	Electricity in MWhNTPSRB												4.66888e+07	4.69307e+07	4.60989e+07	4.52252e+07	4.43065e+07	4.33392e+07	4.23192e+07	4.35016e+07	4.4752e+07	4.60763e+07	4.74815e+07	48975000	4.91348e+07	4.93081e+07	4.9497e+07	4.97034e+07	4.993e+07	5.01799e+07	5.04569e+07	5.07656e+07	5.11119e+07	5.15029e+07	5.19481e+07	5.24595e+07	5.30529e+07	5.375e+07	5.45804e+07	5.55865e+07	5.68306e+07	5.84085e+07	6.04754e+07	63300000
Intensity in tCO2e per MWh	NTP	SRB	Intensity in tCO2e per MWhNTPSRB		NTP SRB										0.724379	0.736148	0.718534	0.700919	0.683304	0.665689	0.648074	0.630459	0.612845	0.59523	0.577615	0.56	0.538	0.516	0.494	0.472	0.45	0.428	0.406	0.384	0.362	0.34	0.318	0.296	0.274	0.252	0.23	0.208	0.186	0.164	0.142	0.12	14.011
Py starting in 2020	NTP	SRB	Py starting in 2020NTPSRB												1	1.01947	0.990329	0.961183	0.932038	0.902893	0.873747	0.844602	0.815456	0.786311	0.757166	0.72802	0.691619	0.655218	0.618817	0.582416	0.546015	0.509614	0.473213	0.436812	0.400411	0.36401	0.327609	0.291208	0.254807	0.218406	0.182005	0.145604	0.109203	0.072802	0.036401	0
Yearly growth physical output	NTP	SRB	Yearly growth physical outputNTPSRB												0	1.00518	0.982275	0.981048	0.979686	0.978167	0.976466	1.02794	1.02874	1.02959	1.0305	1.03146	1.00326	1.00353	1.00383	1.00417	1.00456	1.00501	1.00552	1.00612	1.00682	1.00765	1.00864	1.00984	1.01131	1.01314	1.01545	1.01843	1.02238	1.02776	1.03539	1.04671
Emissions in tCO2	NTP	KOR	Emissions in tCO2NTPKOR												2.50601e+08	2.37569e+08	2.15257e+08	2.27636e+08	223200000	218400000	215800000	211800000	203600000	189900000	173700000	145900000	1.38629e+08	1.31074e+08	1.23234e+08	1.15109e+08	106700000	9.89383e+07	9.10717e+07	83100000
Electricity in MWh	NTP	KOR	Electricity in MWhNTPKOR												5.58158e+08	5.52415e+08	5.43302e+08	5.72147e+08	588000000	595800000	603600000	611400000	619200000	627000000	634800000	642600000	652380000	662160000	671940000	681720000	691500000	6.95833e+08	7.00167e+08	704500000
Intensity in tCO2e per MWh	NTP	KOR	Intensity in tCO2e per MWhNTPKOR		NTP KOR										0.44898	0.430056	0.396201	0.397864	0.379592	0.366566	0.357522	0.346418	0.328811	0.302871	0.273629	0.227046	0.212498	0.197949	0.1834	0.168851	0.154302	0.142187	0.130071	0.117956													5.2793
Py starting in 2020	NTP	KOR	Py starting in 2020NTPKOR												1	0.942833	0.840558	0.845582	0.790384	0.751033	0.723711	0.690168	0.636979	0.558615	0.470279	0.329554	0.285603	0.241652	0.197701	0.15375	0.109799	0.0731996	0.0365998	0
Yearly growth physical output	NTP	KOR	Yearly growth physical outputNTPKOR												0	0.989712	0.983504	1.05309	1.02771	1.01327	1.01309	1.01292	1.01276	1.0126	1.01244	1.01229	1.01522	1.01499	1.01477	1.01455	1.01435	1.00627	1.00623	1.00619
Emissions in tCO2	NTP	THA	Emissions in tCO2NTPTHA												9.7798e+07	101600000	101460000	101320000	101180000	101040000	100900000	94260000	87620000	80980000	74340000	67700000	66800000	65900000	65000000	64100000	63200000	61160000	59120000
Electricity in MWh	NTP	THA	Electricity in MWhNTPTHA												1.93282e+08	2.02796e+08	2.06897e+08	2.13979e+08	2.20317e+08	2.29264e+08	2.41566e+08	2.46785e+08	2.52004e+08	2.57596e+08	2.63187e+08	2.69525e+08	2.75489e+08	2.82945e+08	2.90774e+08	3.00839e+08	3.12022e+08	3.23579e+08	3.35881e+08
Intensity in tCO2e per MWh	NTP	THA	Intensity in tCO2e per MWhNTPTHA		NTP THA										0.505986	0.500996	0.49039	0.473503	0.459248	0.440715	0.417692	0.381952	0.347693	0.314369	0.28246	0.251183	0.242478	0.232907	0.223542	0.213071	0.20255	0.189011	0.176015														6.00476
Py starting in 2020	NTP	THA	Py starting in 2020NTPTHA												1	0.984877	0.952734	0.901558	0.858355	0.802191	0.732417	0.624107	0.520283	0.419291	0.32259	0.227802	0.20142	0.172417	0.144033	0.112301	0.0804152	0.0393861	0
Yearly growth physical output	NTP	THA	Yearly growth physical outputNTPTHA												#DIV/0!	1.04922	1.02022	1.03423	1.02962	1.04061	1.05366	1.0216	1.02115	1.02219	1.02171	1.02408	1.02213	1.02706	1.02767	1.03462	1.03717	1.03704	1.03802
Emissions in tCO2	NTP	ARG	Emissions in tCO2NTPARG												4.09441e+07	4.21323e+07	4.59994e+07	4.22209e+07	3.82504e+07	3.79074e+07	3.43053e+07	3.36192e+07	3.05317e+07	2.96741e+07	2.8988e+07	2.65866e+07	2.65866e+07	2.34991e+07	2.21269e+07	2.00686e+07	1.9554e+07	1.71527e+07	1.78388e+07	1.78388e+07	1.61235e+07	1.61235e+07	1.61235e+07	1.61235e+07	1.61235e+07	1.61235e+07	1.61235e+07	1.61235e+07	1.61235e+07	1.61235e+07	1.61235e+07	1.61235e+07
Electricity in MWh	NTP	ARG	Electricity in MWhNTPARG												1.29713e+08	1.34464e+08	1.42375e+08	1.35375e+08	1.36128e+08	1.38073e+08	1.41184e+08	1.44296e+08	1.46629e+08	1.49741e+08	1.52852e+08	1.55964e+08	1.60242e+08	1.6452e+08	1.67632e+08	1.72299e+08	1.76966e+08	1.81245e+08	1.85134e+08	1.90968e+08	1.95246e+08	2.01858e+08	2.05748e+08	2.10026e+08	2.14693e+08	2.1936e+08	2.24028e+08	2.3064e+08	2.34529e+08	2.40752e+08	2.45419e+08	2.51642e+08
Intensity in tCO2e per MWh	NTP	ARG	Intensity in tCO2e per MWhNTPARG		NTP ARG										0.315651	0.313335	0.323086	0.311881	0.280989	0.274547	0.242983	0.232988	0.208224	0.19817	0.189647	0.170467	0.165915	0.142834	0.131997	0.116475	0.110496	0.0946382	0.096356	0.0934123	0.0825803	0.0798754	0.0783654	0.0767691	0.0751002	0.0735023	0.071971	0.0699078	0.0687484	0.0669714	0.0656978	0.0640731	4.69779
Py starting in 2020	NTP	ARG	Py starting in 2020NTPARG												1	0.990797	1.02955	0.985016	0.862222	0.836615	0.711151	0.671425	0.572988	0.533024	0.499147	0.422906	0.404815	0.313069	0.269993	0.208295	0.184526	0.121494	0.128322	0.116621	0.0735645	0.0628126	0.0568107	0.0504654	0.0438317	0.0374803	0.0313935	0.0231923	0.018584	0.0115205	0.00645795	0
Yearly growth physical output	NTP	ARG	Yearly growth physical outputNTPARG												0	1.03662	1.05884	0.950833	1.00556	1.01429	1.02254	1.02204	1.01617	1.02122	1.02078	1.02036	1.02743	1.0267	1.01891	1.02784	1.02709	1.02418	1.02146	1.03151	1.0224	1.03386	1.01927	1.02079	1.02222	1.02174	1.02128	1.02951	1.01686	1.02653	1.01939	1.02536
Emissions in tCO2	NTP	JPN	Emissions in tCO2NTPJPN														4.83615e+08	4.91219e+08	4.54362e+08	4.33601e+08	4.12487e+08	3.91018e+08	3.69194e+08	3.47016e+08	3.24484e+08	3.01598e+08	2.78357e+08	2.54761e+08	2.30811e+08	2.06507e+08	1.81849e+08	1.56836e+08	1.31468e+08	1.05747e+08	7.96705e+07	53240000
Electricity in MWh	NTP	JPN	Electricity in MWhNTPJPN														1.00861e+09	1.01436e+09	9.87743e+08	9.95052e+08	1.00236e+09	1.00967e+09	1.01698e+09	1.02429e+09	1.0316e+09	1.03891e+09	1.04622e+09	1.05353e+09	1.06084e+09	1.06814e+09	1.07545e+09	1.08276e+09	1.09007e+09	1.09738e+09	1.10469e+09	1112000000
Intensity in tCO2e per MWh	NTP	JPN	Intensity in tCO2e per MWhNTPJPN		NTP JPN												0.479485	0.484263	0.46	0.435758	0.411515	0.387273	0.36303	0.338788	0.314545	0.290303	0.26606	0.241818	0.217575	0.193333	0.16909	0.144848	0.120605	0.0963627	0.0721202	0.0478777											5.27097
Py starting in 2020	NTP	JPN	Py starting in 2020NTPJPN														1	1.01107	0.954855	0.898687	0.842519	0.786351	0.730183	0.674015	0.617847	0.561679	0.505511	0.449344	0.393176	0.337008	0.28084	0.224672	0.168504	0.112336	0.0561679	0
Yearly growth physical output	NTP	JPN	Yearly growth physical outputNTPJPN														0	0	0.973755	1.0074	1.00735	1.00729	1.00724	1.00719	1.00714	1.00709	1.00704	1.00699	1.00694	1.00689	1.00684	1.0068	1.00675	1.00671	1.00666	1.00662
Emissions in tCO2	NTP	IDN	Emissions in tCO2NTPIDN														3.28552e+08	3.49941e+08	3.71377e+08	4.01161e+08	4.33333e+08	4.61905e+08	4.83673e+08	5.0068e+08	5.17687e+08	5.31293e+08	5.35374e+08	5.44898e+08	5.43537e+08	5.7483e+08	5.97279e+08	5.97279e+08	6.0068e+08	5.97279e+08	5.92517e+08	5.77551e+08	5.72109e+08	5.54422e+08	5.48299e+08	5.34014e+08	4.73469e+08	4.46939e+08	4.34014e+08	4.22449e+08	3.57823e+08	3.51701e+08
Electricity in MWh	NTP	IDN	Electricity in MWhNTPIDN														4.33239e+08	4.67101e+08	4.90993e+08	5.25318e+08	5.62044e+08	6.0146e+08	6.35036e+08	6.71533e+08	7.0219e+08	7.38686e+08	7.82482e+08	8.24818e+08	8.68613e+08	9.18248e+08	9.63504e+08	9.9562e+08	1.02774e+09	1.06569e+09	1.10657e+09	1.13869e+09	1.19854e+09	1.25401e+09	1.30511e+09	1.35328e+09	1.40146e+09	1.45109e+09	1.49927e+09	1.53869e+09	1.5781e+09	1.61168e+09
Intensity in tCO2e per MWh	NTP	IDN	Intensity in tCO2e per MWhNTPIDN		NTP IDN												0.758363	0.749177	0.75638	0.763653	0.770996	0.767973	0.761647	0.745578	0.737247	0.71924	0.6842	0.660628	0.625753	0.626007	0.619903	0.599906	0.584469	0.56046	0.535454	0.507208	0.477338	0.442117	0.420117	0.394606	0.33784	0.308001	0.289483	0.274552	0.226743	0.21822	16.435
Py starting in 2020	NTP	IDN	Py starting in 2020NTPIDN														1	0.982993	0.996329	1.00979	1.02339	1.01779	1.00608	0.976331	0.960906	0.927569	0.862698	0.819058	0.754491	0.754961	0.743661	0.706639	0.678059	0.63361	0.587315	0.535022	0.479721	0.414515	0.373785	0.326553	0.22146	0.166217	0.131934	0.10429	0.0157784	0
Yearly growth physical output	NTP	IDN	Yearly growth physical outputNTPIDN														0	1.07816	1.05115	1.07013	1.07013	1.07013	1.05583	1.05747	1.04565	1.05198	1.05929	1.0541	1.0531	1.05714	1.04928	1.03333	1.03226	1.03693	1.03836	1.02902	1.05256	1.04629	1.04075	1.03691	1.0356	1.03542	1.0332	1.02629	1.02562	1.02128
Emissions in tCO2	NTP	ESP	Emissions in tCO2NTPESP												43994377	30814641	2.79426e+07	2.47735e+07	2.13072e+07	1.75438e+07	1.34833e+07	1.34805e+07	1.33557e+07	1.3109e+07	1.27405e+07	12249977
Electricity in MWh	NTP	ESP	Electricity in MWhNTPESP												273257000	263373000	273411400	283449800	293488200	303526600	313565000	335334600	357104200	378873800	400643400	422413000
Intensity in tCO2e per MWh	NTP	ESP	Intensity in tCO2e per MWhNTPESP		NTP ESP										0.161	0.117	0.1022	0.0874	0.0726	0.0578	0.043	0.0402	0.0374	0.0346	0.0318	0.029																					0.719
Py starting in 2020	NTP	ESP	Py starting in 2020NTPESP												1	0.666667	0.554545	0.442424	0.330303	0.218182	0.106061	0.0848485	0.0636364	0.0424242	0.0212121	0
Yearly growth physical output	NTP	ESP	Yearly growth physical outputNTPESP												0	0	1.03811	1.03672	1.03542	1.0342	1.03307	1.06943	1.06492	1.06096	1.05746	1.05434
Emissions in tCO2	NTP	NLD	Emissions in tCO2NTPNLD															30500000	23800000	2.2145e+07	2.1408e+07	2.04158e+07	1.91683e+07	1.76656e+07	1.59077e+07	1.38945e+07	1.16605e+07	9.15403e+06	6.37513e+06	3.32378e+06	0	0	0	0	0	0	0	0	0	0	0	0	0	0	0	0
Electricity in MWh	NTP	NLD	Electricity in MWhNTPNLD															121573000	121331000	123157000	1.30964e+08	1.38771e+08	146578568	1.54386e+08	1.62193e+08	170000136	178333476	186666816	195000156	203333496	211666836	216944618	222222400	227500182	232777964	238055746	2.41472e+08	2.44889e+08	2.48306e+08	2.51722e+08	2.55139e+08	2.58556e+08	2.61972e+08	2.65389e+08	2.68806e+08	272222440
Intensity in tCO2e per MWh	NTP	NLD	Intensity in tCO2e per MWhNTPNLD		NTP NLD													0.250878	0.196158	0.179811	0.163465	0.147118	0.130772	0.114425	0.0980788	0.0817323	0.0653859	0.0490394	0.0326929	0.0163465	0	0	0	0	0	0	0	0	0	0	0	0	0	0	0	0	1.40046
Py starting in 2020	NTP	NLD	Py starting in 2020NTPNLD															1	0.781884	0.716727	0.65157	0.586413	0.521256	0.456099	0.390942	0.325785	0.260628	0.195471	0.130314	0.065157	0	0	0	0	0	0	0	0	0	0	0	0	0	0	0	0
Yearly growth physical output	NTP	NLD	Yearly growth physical outputNTPNLD															0.995113	0.998009	1.01505	1.06339	1.05961	1.05626	1.05326	1.05057	1.04814	1.04902	1.04673	1.04464	1.04274	1.04098	1.02493	1.02433	1.02375	1.0232	1.02267	1.01435	1.01415	1.01395	1.01376	1.01357	1.01339	1.01321	1.01304	1.01287	1.01271
Emissions in tCO2	NTP	FRA	Emissions in tCO2NTPFRA												31639000	37239000	35326800	33414600	31502400	29590200	27678000	27760000	27842000	27924000	28006000	28088000	27964400	27840800	27717200	27593600	27470000	2.19814e+07	1.64928e+07	1.10041e+07	5.5155e+06	26881	26816.8	26752.6	26688.4	26624.2	26560	27713.4	28866.8	30020.2	31173.6	32327
Electricity in MWh	NTP	FRA	Electricity in MWhNTPFRA												475200000	454400000	466500000	467200000	4.684e+08	4.698e+08	4.724e+08	478600000	4.862e+08	493000000	500600000	5.083e+08	513600000	519000000	5.243e+08	5.299e+08	5.352e+08	542300000	5.489e+08	554800000	5.607e+08	567200000	576100000	584900000	593200000	6.012e+08	608800000	616600000	623800000	6.312e+08	6.381e+08	645000000
Intensity in tCO2e per MWh	NTP	FRA	Intensity in tCO2e per MWhNTPFRA		NTP FRA										0.0665804	0.081952	0.0757273	0.071521	0.0672553	0.0629847	0.0585902	0.0580025	0.0572645	0.056641	0.0559449	0.0552587	0.0544478	0.0536432	0.0528652	0.0520732	0.0513266	0.0405336	0.0300469	0.0198344	0.00983682	4.73925e-05	4.65489e-05	4.57388e-05	4.49906e-05	4.42851e-05	4.36268e-05	4.49455e-05	4.62757e-05	4.75605e-05	4.88538e-05	5.01194e-05	1.09953
Py starting in 2020	NTP	FRA	Py starting in 2020NTPFRA												1	1.23105	1.13749	1.07426	1.01015	0.945954	0.879901	0.871068	0.859975	0.850603	0.84014	0.829827	0.817638	0.805544	0.79385	0.781946	0.770724	0.608497	0.450874	0.297373	0.147101	-4.09877e-05	-5.36676e-05	-6.5844e-05	-7.709e-05	-8.76937e-05	-9.75883e-05	-7.77672e-05	-5.7773e-05	-3.84616e-05	-1.90228e-05	0
Yearly growth physical output	NTP	FRA	Yearly growth physical outputNTPFRA												0	0.956229	1.02663	1.0015	1.00257	1.00299	1.00553	1.01312	1.01588	1.01399	1.01542	1.01538	1.01043	1.01051	1.01021	1.01068	1.01	1.01327	1.01217	1.01075	1.01063	1.01159	1.01569	1.01528	1.01419	1.01349	1.01264	1.01281	1.01168	1.01186	1.01093	1.01081
Emissions in tCO2	NTP	TWN	Emissions in tCO2NTPTWN													1.58325e+08	1.50157e+08	1.4199e+08	1.33822e+08	1.25654e+08	1.17487e+08	1.10764e+08	1.04042e+08	9.73194e+07	9.05969e+07	8.38743e+07	7.96649e+07	7.54555e+07	7.12461e+07	6.70366e+07	6.28272e+07	5.89319e+07	5.50366e+07	5.11414e+07	4.72461e+07	4.33508e+07	4.09005e+07	3.84503e+07	3.6e+07	3.35497e+07	3.10995e+07	2.48796e+07	1.86597e+07	1.24398e+07	6.2199e+06	0
Electricity in MWh	NTP	TWN	Electricity in MWhNTPTWN													271250000	278302500	285538365	2.92962e+08	3.00579e+08	3.08394e+08	3.16413e+08	3.24639e+08	3.3308e+08	3.4174e+08	3.50625e+08	3.56586e+08	3.62648e+08	3.68813e+08	3.75083e+08	3.81459e+08	3.87944e+08	3.94539e+08	4.01246e+08	4.08067e+08	4.15005e+08	4.2206e+08	4.29235e+08	4.36532e+08	4.43953e+08	4.515e+08	4.59175e+08	4.66981e+08	4.7492e+08	4.82994e+08	4.91205e+08
Intensity in tCO2e per MWh	NTP	TWN	Intensity in tCO2e per MWhNTPTWN		NTP TWN											0.583685	0.539546	0.49727	0.456789	0.418041	0.380963	0.350063	0.320484	0.29218	0.265105	0.239214	0.22341	0.208068	0.193177	0.178725	0.164702	0.151908	0.139496	0.127456	0.11578	0.104459	0.096907	0.0895786	0.0824682	0.0755705	0.0688804	0.0541832	0.0399581	0.0261934	0.0128778	0	6.49714
Py starting in 2020	NTP	TWN	Py starting in 2020NTPTWN													1	0.924379	0.851948	0.782595	0.716209	0.652686	0.599746	0.549071	0.500578	0.454191	0.409833	0.382758	0.356473	0.33096	0.306201	0.282177	0.260257	0.238992	0.218365	0.19836	0.178964	0.166026	0.153471	0.141289	0.129471	0.118009	0.0928295	0.0684583	0.044876	0.0220629	0
Yearly growth physical output	NTP	TWN	Yearly growth physical outputNTPTWN													#DIV/0!	1.026	1.026	1.026	1.026	1.026	1.026	1.026	1.026	1.026	1.026	1.017	1.017	1.017	1.017	1.017	1.017	1.017	1.017	1.017	1.017	1.017	1.017	1.017	1.017	1.017	1.017	1.017	1.017	1.017	1.017
Emissions in tCO2	1.5N	ZAF	Emissions in tCO21.5NZAF	0	0	0	0	0	0	0	0	0	0	0	0	0	214671000	1.89971e+08	1.65272e+08	1.40572e+08	1.15872e+08	1.00642e+08	8.54119e+07	7.01818e+07	5.49518e+07	3.97217e+07	3.29032e+07	2.60846e+07	1.92661e+07	1.24476e+07	5.6291e+06	4.74637e+06	3.86364e+06	2.98091e+06	2.09818e+06	1.21545e+06	1.11151e+06	1.00758e+06	903642	799707	695772	591837	487902	383967	280032	176097
Electricity in MWh	1.5N	ZAF	Electricity in MWh1.5NZAF	0	0	0	0	0	0	0	0	0	0	0	0	0	239640000	2.54119e+08	2.68598e+08	2.83076e+08	2.97555e+08	3.25313e+08	3.53072e+08	3.8083e+08	4.08588e+08	4.36347e+08	4.82505e+08	5.28663e+08	5.74821e+08	6.20979e+08	6.67138e+08	7.33187e+08	7.99237e+08	8.65286e+08	9.31336e+08	9.97385e+08	1.07925e+09	1.16111e+09	1.24298e+09	1.32484e+09	1.4067e+09	1.48857e+09	1.57043e+09	1.65229e+09	1.73416e+09	1.81602e+09
Intensity in tCO2e per MWh	1.5	ZAF	Intensity in tCO2e per MWh1.5ZAF	0	1.5 ZAF												0.895806	0.747569	0.615313	0.496586	0.389414	0.309369	0.241911	0.184287	0.134492	0.0910324	0.0681924	0.0493408	0.0335167	0.0200451	0.00843769	0.00647361	0.00483416	0.003445	0.00225287	0.00121863	0.00102989	0.000867769	0.000726999	0.000603626	0.000494612	0.000397589	0.000310681	0.000232384	0.00016148	9.69687e-05	3.86051
Py	1.5N	ZAF	Py1.5NZAF	0	0	0	0	0	0	0	0	0	0	0	0	0	1	0.834503	0.686848	0.554297	0.434646	0.345282	0.269969	0.205635	0.150043	0.101523	0.076024	0.0549774	0.0373109	0.0222708	0.00931186	0.0071191	0.00528876	0.00373785	0.00240692	0.00125226	0.00104155	0.000860547	0.000703387	0.000565649	0.000443942	0.000335622	0.000238595	0.000151183	7.20229e-05	0
Yearly growth physical output	1.5N	ZAF	Yearly growth physical output1.5NZAF	0	0	0	0	0	0	0	0	0	0	0	0	0	0	1.06042	1.05698	1.05391	1.05115	1.09329	1.08533	1.07862	1.07289	1.06794	1.10578	1.09566	1.08731	1.0803	1.07433	1.099	1.09009	1.08264	1.07633	1.07092	1.08208	1.07585	1.0705	1.06586	1.06179	1.0582	1.05499	1.05213	1.04955	1.04721
Emissions in tCO2	1.5N	AUS	Emissions in tCO21.5NAUS	0	0	0	0	0	0	0	0	0	0	0	0	0	171918000	1.51676e+08	1.31433e+08	1.11191e+08	9.09486e+07	7.56722e+07	6.03959e+07	4.51195e+07	2.98431e+07	1.45667e+07	1.10615e+07	7.55625e+06	4.05102e+06	545795	-2.95944e+06	-3.35456e+06	-3.74968e+06	-4.14481e+06	-4.53993e+06	-4.93505e+06	-5.18231e+06	-5.42957e+06	-5.67683e+06	-5.92409e+06	-6.17135e+06	-6.41861e+06	-6.66587e+06	-6.91313e+06	-7.16039e+06	-7.40765e+06
Electricity in MWh	1.5N	AUS	Electricity in MWh1.5NAUS	0	0	0	0	0	0	0	0	0	0	0	0	0	2.65115e+08	2.70151e+08	2.75188e+08	2.80224e+08	2.85261e+08	2.96174e+08	3.07087e+08	3.18e+08	3.28914e+08	3.39827e+08	3.58877e+08	3.77928e+08	3.96978e+08	4.16028e+08	4.35079e+08	4.53781e+08	4.72483e+08	4.91185e+08	5.09887e+08	5.28589e+08	5.43252e+08	5.57916e+08	5.72579e+08	5.87242e+08	6.01905e+08	6.16569e+08	6.31232e+08	6.45895e+08	6.60558e+08	6.75222e+08
Intensity in tCO2e per MWh	1.5	AUS	Intensity in tCO2e per MWh1.5AUS	0	1.5 AUS												0.648466	0.561447	0.477613	0.396793	0.318826	0.255499	0.196673	0.141885	0.0907323	0.0428651	0.0308225	0.0199939	0.0102047	0.00131192	-0.00680207	-0.00739247	-0.00793612	-0.00843838	-0.0089038	-0.00933628	-0.00953942	-0.00973189	-0.0099145	-0.010088	-0.010253	-0.0104102	-0.0105601	-0.0107032	-0.0108399	-0.0109707	2.72256
Py	1.5N	AUS	Py1.5NAUS	0	0	0	0	0	0	0	0	0	0	0	0	0	1	0.86804	0.740911	0.618351	0.500119	0.404087	0.314881	0.231797	0.154227	0.0816391	0.0633771	0.0469562	0.0321113	0.0186259	0.0063215	0.00542619	0.00460176	0.00384011	0.00313434	0.00247851	0.00217045	0.00187858	0.00160166	0.00133857	0.0010883	0.000849937	0.000622645	0.000405673	0.000198334	0
Yearly growth physical output	1.5N	AUS	Yearly growth physical output1.5NAUS	0	0	0	0	0	0	0	0	0	0	0	0	0	0	1.019	1.01864	1.0183	1.01797	1.03826	1.03685	1.03554	1.03432	1.03318	1.05606	1.05308	1.05041	1.04799	1.04579	1.04299	1.04121	1.03958	1.03808	1.03668	1.02774	1.02699	1.02628	1.02561	1.02497	1.02436	1.02378	1.02323	1.0227	1.0222
Emissions in tCO2	1.5N	GBR	Emissions in tCO21.5NGBR	0	0	0	0	0	0	0	0	0	0	0	0	0	62607000	5.99528e+07	5.72987e+07	5.46445e+07	5.19904e+07	4.42716e+07	3.65529e+07	2.88341e+07	2.11154e+07	1.33966e+07
Electricity in MWh	1.5N	GBR	Electricity in MWh1.5NGBR	0	0	0	0	0	0	0	0	0	0	0	0	0	3.05914e+08	3.28642e+08	3.5137e+08	3.74098e+08	3.96826e+08	4.11785e+08	4.26744e+08	4.41703e+08	4.56663e+08	4.71622e+08
Intensity in tCO2e per MWh	1.5	GBR	Intensity in tCO2e per MWh1.5GBR	0	1.5 GBR												0.204656	0.182426	0.163072	0.14607	0.131015	0.107511	0.0856552	0.0652794	0.0462385	0.0284055																					1.0438
Py	1.5N	GBR	Py1.5NGBR	0	0	0	0	0	0	0	0	0	0	0	0	0	1	0.873875	0.764066	0.6676	0.582184	0.448828	0.324821	0.209213	0.10118	0
Yearly growth physical output	1.5N	GBR	Yearly growth physical output1.5NGBR	0	0	0	0	0	0	0	0	0	0	0	0	0	0	1.0743	1.06916	1.06468	1.06075	1.0377	1.03633	1.03505	1.03387	1.03276
Emissions in tCO2	1.5N	IND	Emissions in tCO21.5NIND	0	0	0	0	0	0	0	0	0	0	0	0	1.07622e+09	1165721000	1.20662e+09	1.24753e+09	1.28843e+09	1.32933e+09	1.19824e+09	1.06715e+09	9.36058e+08	8.04967e+08	6.73876e+08	5.57648e+08	4.41419e+08
Electricity in MWh	1.5N	IND	Electricity in MWh1.5NIND	0	0	0	0	0	0	0	0	0	0	0	0	1.52418e+09	1.63361e+09	1.84738e+09	2.06115e+09	2.27492e+09	2.48869e+09	2.65114e+09	2.81359e+09	2.97604e+09	3.13849e+09	3.30094e+09	3.59076e+09	3.88059e+09
Intensity in tCO2e per MWh	1.5	IND	Intensity in tCO2e per MWh1.5IND	0	1.5 IND											0.706097	0.713588	0.653155	0.605257	0.566362	0.534148	0.451971	0.379284	0.314532	0.256483	0.204147	0.155301	0.113751																			5.24415
Py	1.5N	IND	Py1.5NIND	0	0	0	0	0	0	0	0	0	0	0	0	1	1.01265	0.910623	0.829763	0.764099	0.709716	0.570985	0.448274	0.338959	0.24096	0.152608	0.070145	0
Yearly growth physical output	1.5N	IND	Yearly growth physical output1.5NIND	0	0	0	0	0	0	0	0	0	0	0	0	0	0	1.13086	1.11572	1.10372	1.09397	1.06527	1.06127	1.05774	1.05459	1.05176	1.0878	1.08071
Emissions in tCO2	1.5N	MEX	Emissions in tCO21.5NMEX	0	0	0	0	0	0	0	0	0	0	0	0	1.60913e+08	154471000	1.40981e+08	1.27491e+08	1.14001e+08	1.00511e+08	8.48859e+07	6.92608e+07	5.36356e+07	3.80105e+07	2.23853e+07	1.76137e+07	1.28422e+07	8.07058e+06	3.299e+06	-1.47257e+06	-1.74024e+06	-2.0079e+06	-2.27556e+06	-2.54322e+06	-2.81088e+06	-3.00181e+06	-3.19274e+06	-3.38367e+06	-3.5746e+06	-3.76552e+06	-3.95645e+06	-4.14738e+06	-4.33831e+06	-4.52924e+06	-4.72016e+06
Electricity in MWh	1.5N	MEX	Electricity in MWh1.5NMEX	0	0	0	0	0	0	0	0	0	0	0	0	3.71614e+08	3.76474e+08	3.74536e+08	3.72598e+08	3.7066e+08	3.68722e+08	3.83393e+08	3.98064e+08	4.12735e+08	4.27406e+08	4.42076e+08	4.68472e+08	4.94868e+08	5.21264e+08	5.4766e+08	5.74055e+08	5.97568e+08	6.21081e+08	6.44594e+08	6.68107e+08	6.9162e+08	7.11365e+08	7.31109e+08	7.50853e+08	7.70597e+08	7.90342e+08	8.10086e+08	8.2983e+08	8.49574e+08	8.69319e+08	8.89063e+08
Intensity in tCO2e per MWh	1.5	MEX	Intensity in tCO2e per MWh1.5MEX	0	1.5 MEX											0.433012	0.41031	0.376415	0.342168	0.307562	0.272593	0.221407	0.173994	0.129952	0.088933	0.0506367	0.0375982	0.0259507	0.0154827	0.00602382	-0.00256521	-0.0029122	-0.00323291	-0.00353022	-0.00380661	-0.0040642	-0.00421979	-0.00436698	-0.00450643	-0.00463873	-0.00476442	-0.00488399	-0.00499787	-0.00510645	-0.0052101	-0.00530914	2.61007
Py	1.5N	MEX	Py1.5NMEX	0	0	0	0	0	0	0	0	0	0	0	0	1	0.948207	0.870879	0.792745	0.713795	0.634015	0.517238	0.409068	0.308589	0.215007	0.127637	0.0978904	0.0713172	0.0474352	0.0258554	0.0062601	0.00546848	0.0047368	0.0040585	0.00342794	0.00284026	0.00248528	0.00214948	0.00183134	0.0015295	0.00124274	0.00096996	0.000710161	0.000462438	0.000225968	0
Yearly growth physical output	1.5N	MEX	Yearly growth physical output1.5NMEX	0	0	0	0	0	0	0	0	0	0	0	0	0	1.01308	0.994852	0.994826	0.994799	0.994772	1.03979	1.03827	1.03686	1.03555	1.03433	1.05971	1.05634	1.05334	1.05064	1.0482	1.04096	1.03935	1.03786	1.03648	1.03519	1.02855	1.02776	1.02701	1.0263	1.02562	1.02498	1.02437	1.02379	1.02324	1.02271
Emissions in tCO2	1.5N	CAN	Emissions in tCO21.5NCAN	0	0	0	0	0	0	0	0	0	0	0	0	0	7.24788e+07	5.92542e+07	4.60295e+07	3.28049e+07	1.95802e+07	1.59835e+07	1.23868e+07	8.79002e+06	5.19329e+06	1.59656e+06	815623	34688.4	-746246	-1.52718e+06	-2.30811e+06	-2.58646e+06	-2.8648e+06	-3.14315e+06	-3.42149e+06	-3.69984e+06	-3.85554e+06	-4.01124e+06	-4.16695e+06	-4.32265e+06	-4.47835e+06	-4.63406e+06	-4.78976e+06	-4.94546e+06	-5.10117e+06	-5.25687e+06
Electricity in MWh	1.5N	CAN	Electricity in MWh1.5NCAN	0	0	0	0	0	0	0	0	0	0	0	0	0	6.44578e+08	6.47268e+08	6.49959e+08	6.52649e+08	6.5534e+08	6.71021e+08	6.86703e+08	7.02384e+08	7.18066e+08	7.33747e+08	7.63502e+08	7.93257e+08	8.23012e+08	8.52768e+08	8.82523e+08	9.15965e+08	9.49408e+08	9.82851e+08	1.01629e+09	1.04974e+09	1.06976e+09	1.08978e+09	1.1098e+09	1.12982e+09	1.14985e+09	1.16987e+09	1.18989e+09	1.20991e+09	1.22993e+09	1.24996e+09
Intensity in tCO2e per MWh	1.5	CAN	Intensity in tCO2e per MWh1.5CAN	0	1.5 CAN												0.112444	0.091545	0.0708191	0.0502642	0.029878	0.0238196	0.018038	0.0125145	0.00723233	0.00217589	0.00106826	4.37291e-05	-0.000906725	-0.00179085	-0.00261536	-0.00282375	-0.00301746	-0.00319799	-0.00336664	-0.00352454	-0.00360412	-0.00368078	-0.00375468	-0.00382595	-0.00389474	-0.00396118	-0.00402538	-0.00408746	-0.00414751	-0.00420564	0.305293
Py	1.5N	CAN	Py1.5NCAN	0	0	0	0	0	0	0	0	0	0	0	0	0	1	0.820841	0.643164	0.466953	0.292188	0.240252	0.190688	0.143337	0.0980542	0.0547069	0.0452116	0.0364285	0.0282806	0.0207013	0.013633	0.0118465	0.0101859	0.00863829	0.00719253	0.00583889	0.00515664	0.00449947	0.00386601	0.003255	0.00266527	0.00209572	0.00154534	0.00101318	0.000498343	0
Yearly growth physical output	1.5N	CAN	Yearly growth physical output1.5NCAN	0	0	0	0	0	0	0	0	0	0	0	0	0	0	1.00417	1.00416	1.00414	1.00412	1.02393	1.02337	1.02284	1.02233	1.02184	1.04055	1.03897	1.03751	1.03615	1.03489	1.03789	1.03651	1.03522	1.03403	1.03291	1.01907	1.01872	1.01837	1.01804	1.01772	1.01741	1.01711	1.01683	1.01655	1.01628
Emissions in tCO2	1.5N	POL	Emissions in tCO21.5NPOL	0	0	0	0	0	0	0	0	0	0	0	0	5.14371e+07	5.99575e+07	5.8169e+07	5.63804e+07	5.45918e+07	5.28033e+07	4.35851e+07	3.4367e+07	2.51488e+07	1.59307e+07	6.71251e+06	5.50871e+06	4.3049e+06	3.10109e+06	1.89729e+06	693484	393625	93765	-206095	-505954	-805814
Electricity in MWh	1.5N	POL	Electricity in MWh1.5NPOL	0	0	0	0	0	0	0	0	0	0	0	0	1.57147e+08	1.78787e+08	1.78494e+08	1.782e+08	1.77907e+08	1.77613e+08	1.86644e+08	1.95675e+08	2.04705e+08	2.13736e+08	2.22766e+08	2.38089e+08	2.53413e+08	2.68736e+08	2.84059e+08	2.99382e+08	3.12025e+08	3.24668e+08	3.37311e+08	3.49954e+08	3.62597e+08
Intensity in tCO2e per MWh	1.5	POL	Intensity in tCO2e per MWh1.5POL	0	1.5 POL											0.327318	0.335357	0.325888	0.316388	0.306856	0.297293	0.23352	0.175633	0.122854	0.0745344	0.0301325	0.0231371	0.0169877	0.0115396	0.00667921	0.00231639	0.00126152	0.000288803	-0.000610993	-0.00144577	-0.00222234											2.44116
Py	1.5N	POL	Py1.5NPOL	0	0	0	0	0	0	0	0	0	0	0	0	1	1.0244	0.995663	0.966834	0.93791	0.90889	0.715368	0.539709	0.379548	0.232921	0.0981819	0.0769541	0.0582935	0.041761	0.0270121	0.0137729	0.0105719	0.00762014	0.00488968	0.00235651	0
Yearly growth physical output	1.5N	POL	Yearly growth physical output1.5NPOL	0	0	0	0	0	0	0	0	0	0	0	0	0	0	0.998359	0.998356	0.998354	0.998351	1.05084	1.04838	1.04615	1.04412	1.04225	1.06879	1.06436	1.06047	1.05702	1.05394	1.04223	1.04052	1.03894	1.03748	1.03613
Emissions in tCO2	1.5N	JPN	Emissions in tCO21.5NJPN	0	0	0	0	0	0	0	0	0	0	0	0	0	479250000	4.18432e+08	3.57613e+08	2.96795e+08	2.35977e+08	2.0461e+08	1.73242e+08	1.41875e+08	1.10508e+08	7.91405e+07	6.55393e+07	5.19381e+07	3.8337e+07	2.47358e+07	1.11346e+07	9.46808e+06	7.80152e+06	6.13496e+06	4.46841e+06	2.80185e+06
Electricity in MWh	1.5N	JPN	Electricity in MWh1.5NJPN	0	0	0	0	0	0	0	0	0	0	0	0	0	1.00308e+09	9.82521e+08	9.61964e+08	9.41408e+08	9.20852e+08	9.158e+08	9.10748e+08	9.05696e+08	9.00644e+08	8.95593e+08	9.13413e+08	9.31233e+08	9.49054e+08	9.66874e+08	9.84694e+08	1.01285e+09	1.04101e+09	1.06917e+09	1.09732e+09	1.12548e+09
Intensity in tCO2e per MWh	1.5	JPN	Intensity in tCO2e per MWh1.5JPN	0	1.5 JPN												0.47778	0.425876	0.371753	0.315267	0.256259	0.223422	0.19022	0.156648	0.122699	0.0883666	0.0717521	0.0557735	0.0403949	0.0255833	0.0113077	0.00934794	0.00749419	0.00573808	0.00407209	0.00248947											2.62211
Py	1.5N	JPN	Py1.5NJPN	0	0	0	0	0	0	0	0	0	0	0	0	0	1	0.890795	0.776923	0.658077	0.533926	0.464837	0.39498	0.324345	0.252917	0.180683	0.145727	0.112108	0.0797522	0.0485888	0.0185534	0.0144301	0.0105298	0.00683501	0.00332981	0
Yearly growth physical output	1.5N	JPN	Yearly growth physical output1.5NJPN	0	0	0	0	0	0	0	0	0	0	0	0	0	0	0.979507	0.979078	0.978631	0.978164	0.994514	0.994484	0.994453	0.994422	0.994391	1.0199	1.01951	1.01914	1.01878	1.01843	1.0286	1.0278	1.02705	1.02634	1.02566
Emissions in tCO2	1.5N	IDN	Emissions in tCO21.5NIDN	0	0	0	0	0	0	0	0	0	0	0	0	0	240267000	2.10475e+08	1.80683e+08	1.50891e+08	1.21099e+08	1.06685e+08	9.22713e+07	7.78574e+07	6.34435e+07	4.90295e+07	4.18464e+07	3.46633e+07	2.74801e+07	2.0297e+07	1.31139e+07	1.08601e+07	8.60638e+06	6.35263e+06	4.09889e+06	1.84515e+06	1.66766e+06	1.49016e+06	1.31267e+06	1.13518e+06	957687	780194	602702	425209	247717	70224.1
Electricity in MWh	1.5N	IDN	Electricity in MWh1.5NIDN	0	0	0	0	0	0	0	0	0	0	0	0	0	3.08657e+08	3.22366e+08	3.36075e+08	3.49785e+08	3.63494e+08	3.99534e+08	4.35575e+08	4.71616e+08	5.07656e+08	5.43697e+08	5.95381e+08	6.47066e+08	6.98751e+08	7.50435e+08	8.0212e+08	8.61606e+08	9.21091e+08	9.80577e+08	1.04006e+09	1.09955e+09	1.16135e+09	1.22316e+09	1.28496e+09	1.34676e+09	1.40857e+09	1.47037e+09	1.53218e+09	1.59398e+09	1.65578e+09	1.71759e+09
Intensity in tCO2e per MWh	1.5	IDN	Intensity in tCO2e per MWh1.5IDN	0	1.5 IDN												0.778427	0.652907	0.537627	0.431383	0.333153	0.267024	0.211838	0.165087	0.124973	0.0901781	0.070285	0.0535699	0.0393275	0.027047	0.016349	0.0126045	0.00934367	0.00647847	0.00394101	0.0016781	0.00143596	0.0012183	0.00102157	0.000842894	0.000679901	0.00053061	0.000393363	0.00026676	0.000149607	4.08853e-05	3.45057
Py	1.5N	IDN	Py1.5NIDN	0	0	0	0	0	0	0	0	0	0	0	0	0	1	0.838743	0.690641	0.554149	0.427953	0.342996	0.272098	0.212036	0.160502	0.1158	0.0902433	0.0687692	0.0504719	0.0346949	0.0209512	0.0161406	0.0119514	0.00827042	0.00501052	0.00210334	0.00179227	0.00151263	0.00125989	0.00103035	0.00082095	0.000629154	0.000452832	0.000290183	0.000139676	0
Yearly growth physical output	1.5N	IDN	Yearly growth physical output1.5NIDN	0	0	0	0	0	0	0	0	0	0	0	0	0	0	1.04442	1.04253	1.04079	1.03919	1.09915	1.09021	1.08274	1.07642	1.07099	1.09506	1.08681	1.07988	1.07397	1.06887	1.07416	1.06904	1.06458	1.06066	1.05719	1.05621	1.05322	1.05053	1.0481	1.04589	1.04388	1.04203	1.04034	1.03877	1.03733
Emissions in tCO2	1.5N	MYS	Emissions in tCO21.5NMYS	0	0	0	0	0	0	0	0	0	0	0	116375000	1.11195e+08	1.06016e+08	1.00836e+08	9.56568e+07	9.04772e+07	8.52977e+07	8.04707e+07	7.56437e+07	7.08167e+07	6.59897e+07	6.11627e+07	0	0	0	0	0	0	0	0	0	0	0	0	0	0	0	0	0	0	0	0
Electricity in MWh	1.5N	MYS	Electricity in MWh1.5NMYS	0	0	0	0	0	0	0	0	0	0	0	175778000	1.82373e+08	1.88967e+08	1.95562e+08	2.02156e+08	2.08751e+08	2.15345e+08	2.23951e+08	2.32556e+08	2.41162e+08	2.49767e+08	2.58373e+08	0	0	0	0	0	0	0	0	0	0	0	0	0	0	0	0	0	0	0	0
Intensity in tCO2e per MWh	1.5	MYS	Intensity in tCO2e per MWh1.5MYS	0	1.5 MYS										0.662057	0.609716	0.561028	0.515624	0.473183	0.433422	0.396097	0.359323	0.32527	0.293648	0.264204	0.236722																					4.68091
Py	1.5N	MYS	Py1.5NMYS	0	0	0	0	0	0	0	0	0	0	0	1	0.876942	0.762473	0.655724	0.55594	0.46246	0.374705	0.288245	0.208184	0.133837	0.0646129	0	0	0	0	0	0	0	0	0	0	0	0	0	0	0	0	0	0	0	0	0
Yearly growth physical output	1.5N	MYS	Yearly growth physical output1.5NMYS	0	0	0	0	0	0	0	0	0	0	0	0	1.03752	1.03616	1.0349	1.03372	1.03262	1.03159	1.03996	1.03843	1.037	1.03568	1.03445	0	0	0	0	0	0	0	0	0	0	0	0	0	0	0	0	0	0	0	0
Emissions in tCO2	1.5N	PHL	Emissions in tCO21.5NPHL	0	0	0	0	0	0	0	0	0	0	0	71259000	6.71691e+07	6.30791e+07	5.89892e+07	5.48993e+07	5.08093e+07	4.67194e+07	4.36279e+07	4.05364e+07	3.74449e+07	3.43534e+07	3.12619e+07	2.75704e+07	2.38788e+07	2.01873e+07	1.64957e+07	1.28042e+07	1.09805e+07	9.15678e+06	7.33307e+06	5.50937e+06	3.68567e+06	3.2587e+06	2.83173e+06	2.40476e+06	1.97779e+06	1.55083e+06	1.10922e+06	667612	226005	-215602	-657209
Electricity in MWh	1.5N	PHL	Electricity in MWh1.5NPHL	0	0	0	0	0	0	0	0	0	0	0	1.06028e+08	1.08345e+08	1.10663e+08	1.1298e+08	1.15298e+08	1.17615e+08	1.19933e+08	1.24383e+08	1.28834e+08	1.33284e+08	1.37735e+08	1.42186e+08	1.50864e+08	1.59543e+08	1.68222e+08	1.769e+08	1.85579e+08	1.95857e+08	2.06134e+08	2.16412e+08	2.2669e+08	2.36968e+08	2.51552e+08	2.66137e+08	2.80722e+08	2.95307e+08	3.09891e+08	3.20734e+08	3.31576e+08	3.42418e+08	3.5326e+08	3.64102e+08
Intensity in tCO2e per MWh	1.5	PHL	Intensity in tCO2e per MWh1.5PHL	0	1.5 PHL										0.672077	0.619953	0.570012	0.522119	0.476152	0.431996	0.389547	0.350754	0.314641	0.28094	0.249417	0.219867	0.18275	0.14967	0.120004	0.0932488	0.0689959	0.0560639	0.0444214	0.0338848	0.0243036	0.0155535	0.0129544	0.0106401	0.00856635	0.00669742	0.00500442	0.00345838	0.00201345	0.000660026	-0.000610321	-0.00180501	5.59881
Py	1.5N	PHL	Py1.5NPHL	0	0	0	0	0	0	0	0	0	0	0	1	0.922651	0.848541	0.777472	0.709259	0.643735	0.580743	0.523176	0.469587	0.419576	0.372798	0.328948	0.273868	0.22478	0.180757	0.141054	0.105064	0.0858739	0.0685971	0.0529614	0.0387435	0.0257589	0.021902	0.0184678	0.0153905	0.0126171	0.0101048	0.00781055	0.00566637	0.00365797	0.00177285	0
Yearly growth physical output	1.5N	PHL	Yearly growth physical output1.5NPHL	0	0	0	0	0	0	0	0	0	0	0	0	1.02186	1.02139	1.02094	1.02051	1.0201	1.0197	1.03711	1.03578	1.03455	1.03339	1.03231	1.06104	1.05753	1.0544	1.05159	1.04906	1.05538	1.05248	1.04986	1.04749	1.04534	1.06155	1.05798	1.0548	1.05195	1.04939	1.03499	1.0338	1.0327	1.03166	1.03069
Emissions in tCO2	1.5N	KOR	Emissions in tCO21.5NKOR	0	0	0	0	0	0	0	0	0	0	0	2.83403e+08	2.75073e+08	2.66744e+08	2.58415e+08	2.50085e+08	2.41756e+08	2.33427e+08	2.20614e+08	2.07801e+08	1.94987e+08	1.82174e+08	1.69361e+08	1.53088e+08	1.36815e+08	1.20542e+08	1.04269e+08	8.79961e+07	7.94267e+07	7.08572e+07	6.22878e+07
Electricity in MWh	1.5N	KOR	Electricity in MWh1.5NKOR	0	0	0	0	0	0	0	0	0	0	0	5.74783e+08	5.94297e+08	6.13811e+08	6.33324e+08	6.52838e+08	6.72352e+08	6.91866e+08	7.1143e+08	7.30994e+08	7.50558e+08	7.70122e+08	7.89686e+08	8.15847e+08	8.42008e+08	8.68168e+08	8.94329e+08	9.20489e+08	9.57794e+08	9.95099e+08	1.0324e+09
Intensity in tCO2e per MWh	1.5	KOR	Intensity in tCO2e per MWh1.5KOR	0	1.5 KOR										0.49306	0.462855	0.434571	0.408029	0.383074	0.359568	0.337388	0.310099	0.284271	0.25979	0.236552	0.214466	0.187643	0.162487	0.138846	0.116589	0.095597	0.0829267	0.0712062	0.0603328													4.82266
Py	1.5N	KOR	Py1.5NKOR	0	0	0	0	0	0	0	0	0	0	0	1	0.930198	0.864835	0.8035	0.745831	0.69151	0.640252	0.577191	0.517505	0.46093	0.40723	0.356191	0.294205	0.23607	0.181439	0.130004	0.0814929	0.0522126	0.0251276	0
Yearly growth physical output	1.5N	KOR	Yearly growth physical output1.5NKOR	0	0	0	0	0	0	0	0	0	0	0	0	1.03395	1.03284	1.03179	1.03081	1.02989	1.02902	1.02828	1.0275	1.02676	1.02607	1.0254	1.03313	1.03207	1.03107	1.03013	1.02925	1.04053	1.03895	1.03749
Emissions in tCO2	1.5N	THA	Emissions in tCO21.5NTHA	0	0	0	0	0	0	0	0	0	0	0	87837000	8.68288e+07	8.58205e+07	8.48123e+07	8.3804e+07	8.27958e+07	8.17876e+07	7.83642e+07	7.49409e+07	7.15175e+07	6.80942e+07	6.46708e+07	5.52598e+07	4.58488e+07	3.64378e+07	2.70268e+07	1.76158e+07	1.18396e+07	6.06345e+06
Electricity in MWh	1.5N	THA	Electricity in MWh1.5NTHA	0	0	0	0	0	0	0	0	0	0	0	190682000	1.9869e+08	2.06698e+08	2.14706e+08	2.22715e+08	2.30723e+08	2.38731e+08	2.48581e+08	2.5843e+08	2.6828e+08	2.7813e+08	2.8798e+08	3.06653e+08	3.25326e+08	3.43999e+08	3.62672e+08	3.81345e+08	4.01701e+08	4.22058e+08
Intensity in tCO2e per MWh	1.5	THA	Intensity in tCO2e per MWh1.5THA	0	1.5 THA										0.460647	0.437006	0.415197	0.395015	0.376284	0.358854	0.342593	0.315247	0.289985	0.266578	0.244829	0.224567	0.180203	0.140932	0.105924	0.0745214	0.0461939	0.0294737	0.0143664														4.48091
Py	1.5N	THA	Py1.5NTHA	0	0	0	0	0	0	0	0	0	0	0	1	0.947027	0.898159	0.852937	0.810966	0.771909	0.735472	0.674196	0.61759	0.565141	0.516407	0.471007	0.371598	0.283601	0.205158	0.134792	0.0713173	0.0338516	0
Yearly growth physical output	1.5N	THA	Yearly growth physical output1.5NTHA	0	0	0	0	0	0	0	0	0	0	0	0	1.042	1.0403	1.03874	1.0373	1.03596	1.03471	1.04126	1.03962	1.03811	1.03671	1.03541	1.06484	1.06089	1.0574	1.05428	1.05149	1.05338	1.05068
Emissions in tCO2	1.5N	SRB	Emissions in tCO21.5NSRB	0	0	0	0	0	0	0	0	0	0	0	2.63337e+07	2.49203e+07	2.35069e+07	2.20935e+07	2.06801e+07	1.92666e+07	1.78532e+07	1.64529e+07	1.50527e+07	1.36524e+07	1.22521e+07	1.08518e+07	1.00673e+07	9.2828e+06	8.49832e+06	7.71384e+06	6.92935e+06	6.35751e+06	5.78567e+06	5.21384e+06	4.642e+06	4.07016e+06	3.72719e+06	3.38422e+06	3.04126e+06	2.69829e+06	2.35532e+06	2.00493e+06	1.65454e+06	1.30415e+06	953765	603376
Electricity in MWh	1.5N	SRB	Electricity in MWh1.5NSRB	0	0	0	0	0	0	0	0	0	0	0	3.6853e+07	3.81709e+07	3.94887e+07	4.08066e+07	4.21244e+07	4.34423e+07	4.47601e+07	4.59935e+07	4.72269e+07	4.84603e+07	4.96937e+07	5.09271e+07	5.25937e+07	5.42603e+07	5.59269e+07	5.75935e+07	5.92601e+07	6.10896e+07	6.2919e+07	6.47484e+07	6.65778e+07	6.84073e+07	7.04483e+07	7.24893e+07	7.45303e+07	7.65713e+07	7.86124e+07	7.96588e+07	8.07052e+07	8.17516e+07	8.2798e+07	8.38444e+07
Intensity in tCO2e per MWh	1.5	SRB	Intensity in tCO2e per MWh1.5SRB	0	1.5 SRB										0.71456	0.652861	0.595281	0.541419	0.490928	0.4435	0.398865	0.357723	0.31873	0.281722	0.246552	0.213084	0.191416	0.171079	0.151954	0.133936	0.116931	0.104069	0.0919543	0.0805245	0.0697229	0.0594989	0.0529068	0.0466858	0.0408056	0.0352389	0.0299612	0.025169	0.0205011	0.0159526	0.0115192	0.00719638	6.35137
Py	1.5N	SRB	Py1.5NSRB	0	0	0	0	0	0	0	0	0	0	0	1	0.912776	0.831375	0.755231	0.683851	0.616802	0.553701	0.495539	0.440415	0.388097	0.338376	0.291064	0.260431	0.231681	0.204644	0.179171	0.155132	0.136948	0.119822	0.103664	0.0883937	0.0739401	0.0646208	0.0558262	0.0475134	0.0396437	0.0321826	0.0254079	0.0188088	0.0123787	0.00611114	0
Yearly growth physical output	1.5N	SRB	Yearly growth physical output1.5NSRB	0	0	0	0	0	0	0	0	0	0	0	0	1.03576	1.03453	1.03337	1.0323	1.03128	1.03034	1.02756	1.02682	1.02612	1.02545	1.02482	1.03273	1.03169	1.03071	1.0298	1.02894	1.03087	1.02995	1.02908	1.02825	1.02748	1.02984	1.02897	1.02816	1.02739	1.02666	1.01331	1.01314	1.01297	1.0128	1.01264
Emissions in tCO2	1.5N	ARG	Emissions in tCO21.5NARG	0	0	0	0	0	0	0	0	0	0	0	39964000	3.86578e+07	3.73515e+07	3.60453e+07	3.4739e+07	3.34328e+07	3.21266e+07	3.1435e+07	3.07434e+07	3.00519e+07	2.93603e+07	2.86687e+07	2.65118e+07	2.4355e+07	2.21981e+07	2.00412e+07	1.78843e+07	1.61775e+07	1.44707e+07	1.27639e+07	1.10571e+07	9.35027e+06	8.38696e+06	7.42364e+06	6.46033e+06	5.49702e+06	4.53371e+06	3.52201e+06	2.5103e+06	1.4986e+06	486894	-524809
Electricity in MWh	1.5N	ARG	Electricity in MWh1.5NARG	0	0	0	0	0	0	0	0	0	0	0	1.39147e+08	1.44902e+08	1.50658e+08	1.56413e+08	1.62168e+08	1.67923e+08	1.73679e+08	1.81351e+08	1.89024e+08	1.96696e+08	2.04369e+08	2.12042e+08	2.22426e+08	2.32811e+08	2.43195e+08	2.5358e+08	2.63964e+08	2.75493e+08	2.87022e+08	2.98551e+08	3.10081e+08	3.2161e+08	3.35327e+08	3.49044e+08	3.62761e+08	3.76479e+08	3.90196e+08	4.11055e+08	4.31914e+08	4.52773e+08	4.73632e+08	4.94491e+08
Intensity in tCO2e per MWh	1.5	ARG	Intensity in tCO2e per MWh1.5ARG	0	1.5 ARG										0.287207	0.266785	0.247923	0.23045	0.214216	0.199096	0.184977	0.173338	0.162643	0.152783	0.143663	0.135203	0.119194	0.104613	0.0912768	0.0790331	0.0677527	0.0587219	0.0504166	0.0427527	0.0356587	0.0290734	0.0250113	0.0212685	0.0178088	0.0146011	0.0116191	0.00856821	0.00581204	0.00330982	0.001028	-0.00106131	3.04167
Py	1.5N	ARG	Py1.5NARG	0	0	0	0	0	0	0	0	0	0	0	1	0.929156	0.863725	0.80311	0.746796	0.694343	0.645366	0.604989	0.567889	0.533684	0.502048	0.472701	0.417164	0.366582	0.32032	0.277847	0.238715	0.207387	0.178576	0.15199	0.127381	0.104537	0.0904456	0.0774619	0.0654601	0.0543329	0.0439881	0.0334047	0.0238436	0.0151634	0.00724781	0
Yearly growth physical output	1.5N	ARG	Yearly growth physical output1.5NARG	0	0	0	0	0	0	0	0	0	0	0	0	1.04136	1.03972	1.0382	1.0368	1.03549	1.03427	1.04418	1.04231	1.04059	1.03901	1.03754	1.04897	1.04669	1.04461	1.0427	1.04095	1.04368	1.04185	1.04017	1.03862	1.03718	1.04265	1.04091	1.0393	1.03781	1.03644	1.05346	1.05074	1.04829	1.04607	1.04404
Emissions in tCO2	1.5N	ESP	Emissions in tCO21.5NESP	0	0	0	0	0	0	0	0	0	0	0	53735000	5.15387e+07	4.93424e+07	4.71461e+07	4.49499e+07	4.27536e+07	4.05573e+07	3.79629e+07	3.53686e+07	3.27742e+07	3.01799e+07	2.75855e+07
Electricity in MWh	1.5N	ESP	Electricity in MWh1.5NESP	0	0	0	0	0	0	0	0	0	0	0	2.69905e+08	2.80324e+08	2.90742e+08	3.01161e+08	3.11579e+08	3.21998e+08	3.32416e+08	3.44225e+08	3.56034e+08	3.67843e+08	3.79651e+08	3.9146e+08
Intensity in tCO2e per MWh	1.5	ESP	Intensity in tCO2e per MWh1.5ESP	0	1.5 ESP										0.199089	0.183854	0.169712	0.156548	0.144265	0.132776	0.122008	0.110285	0.0993405	0.0890985	0.0794937	0.0704683																					1.42216
Py	1.5N	ESP	Py1.5NESP	0	0	0	0	0	0	0	0	0	0	0	1	0.881557	0.771603	0.669256	0.573754	0.484432	0.400709	0.30957	0.224476	0.144847	0.0701707	0
Yearly growth physical output	1.5N	ESP	Yearly growth physical output1.5NESP	0	0	0	0	0	0	0	0	0	0	0	0	1.0386	1.03717	1.03583	1.03459	1.03344	1.03236	1.03552	1.03431	1.03317	1.0321	1.0311
Emissions in tCO2	1.5N	FRA	Emissions in tCO21.5NFRA	0	0	0	0	0	0	0	0	0	0	0	2.91906e+07	2.81316e+07	2.70727e+07	2.60138e+07	2.49548e+07	2.38959e+07	2.2837e+07	2.13562e+07	1.98755e+07	1.83948e+07	1.69141e+07	1.54334e+07	1.43813e+07	1.33292e+07	1.22771e+07	1.1225e+07	1.01729e+07	9.18229e+06	8.19172e+06	7.20115e+06	6.21057e+06	5.22e+06	4.37024e+06	3.52047e+06	2.67071e+06	1.82094e+06	971178	-20328	-1.01183e+06	-2.00334e+06	-2.99485e+06	-3.98635e+06
Electricity in MWh	1.5N	FRA	Electricity in MWh1.5NFRA	0	0	0	0	0	0	0	0	0	0	0	5.63431e+08	5.83481e+08	6.03532e+08	6.23583e+08	6.43634e+08	6.63684e+08	6.83735e+08	7.09365e+08	7.34996e+08	7.60626e+08	7.86256e+08	8.11887e+08	8.32156e+08	8.52425e+08	8.72694e+08	8.92963e+08	9.13232e+08	9.32282e+08	9.51332e+08	9.70382e+08	9.89432e+08	1.00848e+09	1.03414e+09	1.0598e+09	1.08546e+09	1.11112e+09	1.13678e+09	1.15889e+09	1.181e+09	1.20311e+09	1.22522e+09	1.24733e+09
Intensity in tCO2e per MWh	1.5	FRA	Intensity in tCO2e per MWh1.5FRA	0	1.5 FRA										0.0518086	0.0482134	0.0448571	0.0417166	0.0387718	0.0360049	0.0334003	0.0301061	0.0270417	0.0241838	0.0215122	0.0190093	0.017282	0.0156368	0.014068	0.0125705	0.0111394	0.00984926	0.00861079	0.00742094	0.00627691	0.0051761	0.00422596	0.00332182	0.00246044	0.00163884	0.000854324	-1.75409e-05	-0.000856761	-0.00166514	-0.00244434	-0.00319591	0.504672
Py	1.5N	FRA	Py1.5NFRA	0	0	0	0	0	0	0	0	0	0	0	1	0.934638	0.873619	0.816524	0.762986	0.712683	0.665331	0.605442	0.549729	0.497772	0.449202	0.403698	0.372295	0.342385	0.313864	0.286638	0.260621	0.237165	0.21465	0.193018	0.172219	0.152206	0.134932	0.118494	0.102834	0.0878973	0.0736346	0.0577838	0.0425265	0.02783	0.0136639	0
Yearly growth physical output	1.5N	FRA	Yearly growth physical output1.5NFRA	0	0	0	0	0	0	0	0	0	0	0	0	1.03559	1.03436	1.03322	1.03215	1.03115	1.03021	1.03749	1.03613	1.03487	1.0337	1.0326	1.02497	1.02436	1.02378	1.02323	1.0227	1.02086	1.02043	1.02002	1.01963	1.01925	1.02544	1.02481	1.02421	1.02364	1.02309	1.01945	1.01908	1.01872	1.01838	1.01805

## Sheet: 1.5 CA
Data source:	Name	National Pathways Explorer, Climate Analytics
	url	https://climateanalytics.org/projects/15c-national-pathways
Color code	Reported
	Calculated
Key indicators - 1.5 CA - ZAF
Year	2005	2006	2007	2008	2009	2010	2011	2012	2013	2014	2015	2016	2017	2018	2019	2020	2021	2022	2023	2024	2025	2026	2027	2028	2029	2030	2031	2032	2033	2034	2035	2036	2037	2038	2039	2040	2041	2042	2043	2044	2045	2046	2047	2048	2049	2050
Emissions in tCO2																	214671000	1.89971e+08	1.65272e+08	1.40572e+08	1.15872e+08	1.00642e+08	8.54119e+07	7.01818e+07	5.49518e+07	3.97217e+07	3.29032e+07	2.60846e+07	1.92661e+07	1.24476e+07	5.6291e+06	4.74637e+06	3.86364e+06	2.98091e+06	2.09818e+06	1.21545e+06	1.11151e+06	1.00758e+06	903642	799707	695772	591837	487902	383967	280032	176097
Electricity in MWh																	239640000	2.54119e+08	2.68598e+08	2.83076e+08	2.97555e+08	3.25313e+08	3.53072e+08	3.8083e+08	4.08588e+08	4.36347e+08	4.82505e+08	5.28663e+08	5.74821e+08	6.20979e+08	6.67138e+08	7.33187e+08	7.99237e+08	8.65286e+08	9.31336e+08	9.97385e+08	1.07925e+09	1.16111e+09	1.24298e+09	1.32484e+09	1.4067e+09	1.48857e+09	1.57043e+09	1.65229e+09	1.73416e+09	1.81602e+09
Intensity in tCO2e per MWh																	0.895806	0.747569	0.615313	0.496586	0.389414	0.309369	0.241911	0.184287	0.134492	0.0910324	0.0681924	0.0493408	0.0335167	0.0200451	0.00843769	0.00647361	0.00483416	0.003445	0.00225287	0.00121863	0.00102989	0.000867769	0.000726999	0.000603626	0.000494612	0.000397589	0.000310681	0.000232384	0.00016148	9.69687e-05
Py																	1	0.834503	0.686848	0.554297	0.434646	0.345282	0.269969	0.205635	0.150043	0.101523	0.076024	0.0549774	0.0373109	0.0222708	0.00931186	0.0071191	0.00528876	0.00373785	0.00240692	0.00125226	0.00104155	0.000860547	0.000703387	0.000565649	0.000443942	0.000335622	0.000238595	0.000151183	7.20229e-05	0
Yearly growth physical output																		1.06042	1.05698	1.05391	1.05115	1.09329	1.08533	1.07862	1.07289	1.06794	1.10578	1.09566	1.08731	1.0803	1.07433	1.099	1.09009	1.08264	1.07633	1.07092	1.08208	1.07585	1.0705	1.06586	1.06179	1.0582	1.05499	1.05213	1.04955	1.04721
Key indicators - 1.5 CA - AUS
Year	2005	2006	2007	2008	2009	2010	2011	2012	2013	2014	2015	2016	2017	2018	2019	2020	2021	2022	2023	2024	2025	2026	2027	2028	2029	2030	2031	2032	2033	2034	2035	2036	2037	2038	2039	2040	2041	2042	2043	2044	2045	2046	2047	2048	2049	2050
Emissions in tCO2																	171918000	1.51676e+08	1.31433e+08	1.11191e+08	9.09486e+07	7.56722e+07	6.03959e+07	4.51195e+07	2.98431e+07	1.45667e+07	1.10615e+07	7.55625e+06	4.05102e+06	545795	-2.95944e+06	-3.35456e+06	-3.74968e+06	-4.14481e+06	-4.53993e+06	-4.93505e+06	-5.18231e+06	-5.42957e+06	-5.67683e+06	-5.92409e+06	-6.17135e+06	-6.41861e+06	-6.66587e+06	-6.91313e+06	-7.16039e+06	-7.40765e+06
Electricity in MWh																	2.65115e+08	2.70151e+08	2.75188e+08	2.80224e+08	2.85261e+08	2.96174e+08	3.07087e+08	3.18e+08	3.28914e+08	3.39827e+08	3.58877e+08	3.77928e+08	3.96978e+08	4.16028e+08	4.35079e+08	4.53781e+08	4.72483e+08	4.91185e+08	5.09887e+08	5.28589e+08	5.43252e+08	5.57916e+08	5.72579e+08	5.87242e+08	6.01905e+08	6.16569e+08	6.31232e+08	6.45895e+08	6.60558e+08	6.75222e+08
Intensity in tCO2e per MWh																	0.648466	0.561447	0.477613	0.396793	0.318826	0.255499	0.196673	0.141885	0.0907323	0.0428651	0.0308225	0.0199939	0.0102047	0.00131192	-0.00680207	-0.00739247	-0.00793612	-0.00843838	-0.0089038	-0.00933628	-0.00953942	-0.00973189	-0.0099145	-0.010088	-0.010253	-0.0104102	-0.0105601	-0.0107032	-0.0108399	-0.0109707
Py																	1	0.86804	0.740911	0.618351	0.500119	0.404087	0.314881	0.231797	0.154227	0.0816391	0.0633771	0.0469562	0.0321113	0.0186259	0.0063215	0.00542619	0.00460176	0.00384011	0.00313434	0.00247851	0.00217045	0.00187858	0.00160166	0.00133857	0.0010883	0.000849937	0.000622645	0.000405673	0.000198334	0
Yearly growth physical output																		1.019	1.01864	1.0183	1.01797	1.03826	1.03685	1.03554	1.03432	1.03318	1.05606	1.05308	1.05041	1.04799	1.04579	1.04299	1.04121	1.03958	1.03808	1.03668	1.02774	1.02699	1.02628	1.02561	1.02497	1.02436	1.02378	1.02323	1.0227	1.0222
Key indicators - 1.5 CA - GBR
Year	2005	2006	2007	2008	2009	2010	2011	2012	2013	2014	2015	2016	2017	2018	2019	2020	2021	2022	2023	2024	2025	2026	2027	2028	2029	2030	2031	2032	2033	2034	2035	2036	2037	2038	2039	2040	2041	2042	2043	2044	2045	2046	2047	2048	2049	2050
Emissions in tCO2																	62607000	5.99528e+07	5.72987e+07	5.46445e+07	5.19904e+07	4.42716e+07	3.65529e+07	2.88341e+07	2.11154e+07	1.33966e+07
Electricity in MWh																	3.05914e+08	3.28642e+08	3.5137e+08	3.74098e+08	3.96826e+08	4.11785e+08	4.26744e+08	4.41703e+08	4.56663e+08	4.71622e+08
Intensity in tCO2e per MWh																	0.204656	0.182426	0.163072	0.14607	0.131015	0.107511	0.0856552	0.0652794	0.0462385	0.0284055
Py																	1	0.873875	0.764066	0.6676	0.582184	0.448828	0.324821	0.209213	0.10118	0
Yearly growth physical output																		1.0743	1.06916	1.06468	1.06075	1.0377	1.03633	1.03505	1.03387	1.03276
Key indicators - 1.5 CA - IND
Year	2005	2006	2007	2008	2009	2010	2011	2012	2013	2014	2015	2016	2017	2018	2019	2020	2021	2022	2023	2024	2025	2026	2027	2028	2029	2030	2031	2032	2033	2034	2035	2036	2037	2038	2039	2040	2041	2042	2043	2044	2045	2046	2047	2048	2049	2050
Emissions in tCO2																1.07622e+09	1165721000	1.20662e+09	1.24753e+09	1.28843e+09	1.32933e+09	1.19824e+09	1.06715e+09	9.36058e+08	8.04967e+08	6.73876e+08	5.57648e+08	4.41419e+08			9.27326e+07
Electricity in MWh																1.52418e+09	1.63361e+09	1.84738e+09	2.06115e+09	2.27492e+09	2.48869e+09	2.65114e+09	2.81359e+09	2.97604e+09	3.13849e+09	3.30094e+09	3.59076e+09	3.88059e+09			4.75006e+09
Intensity in tCO2e per MWh																0.706097	0.713588	0.653155	0.605257	0.566362	0.534148	0.451971	0.379284	0.314532	0.256483	0.204147	0.155301	0.113751			0.0195224
Py																1	1.01265	0.910623	0.829763	0.764099	0.709716	0.570985	0.448274	0.338959	0.24096	0.152608	0.070145	0
Yearly growth physical output																		1.13086	1.11572	1.10372	1.09397	1.06527	1.06127	1.05774	1.05459	1.05176	1.0878	1.08071	0	#DIV/0!	#DIV/0!
Key indicators - 1.5 CA - MEX
Year	2005	2006	2007	2008	2009	2010	2011	2012	2013	2014	2015	2016	2017	2018	2019	2020	2021	2022	2023	2024	2025	2026	2027	2028	2029	2030	2031	2032	2033	2034	2035	2036	2037	2038	2039	2040	2041	2042	2043	2044	2045	2046	2047	2048	2049	2050
Emissions in tCO2																1.60913e+08	154471000	1.40981e+08	1.27491e+08	1.14001e+08	1.00511e+08	8.48859e+07	6.92608e+07	5.36356e+07	3.80105e+07	2.23853e+07	1.76137e+07	1.28422e+07	8.07058e+06	3.299e+06	-1.47257e+06	-1.74024e+06	-2.0079e+06	-2.27556e+06	-2.54322e+06	-2.81088e+06	-3.00181e+06	-3.19274e+06	-3.38367e+06	-3.5746e+06	-3.76552e+06	-3.95645e+06	-4.14738e+06	-4.33831e+06	-4.52924e+06	-4.72016e+06
Electricity in MWh																3.71614e+08	3.76474e+08	3.74536e+08	3.72598e+08	3.7066e+08	3.68722e+08	3.83393e+08	3.98064e+08	4.12735e+08	4.27406e+08	4.42076e+08	4.68472e+08	4.94868e+08	5.21264e+08	5.4766e+08	5.74055e+08	5.97568e+08	6.21081e+08	6.44594e+08	6.68107e+08	6.9162e+08	7.11365e+08	7.31109e+08	7.50853e+08	7.70597e+08	7.90342e+08	8.10086e+08	8.2983e+08	8.49574e+08	8.69319e+08	8.89063e+08
Intensity in tCO2e per MWh																0.433012	0.41031	0.376415	0.342168	0.307562	0.272593	0.221407	0.173994	0.129952	0.088933	0.0506367	0.0375982	0.0259507	0.0154827	0.00602382	-0.00256521	-0.0029122	-0.00323291	-0.00353022	-0.00380661	-0.0040642	-0.00421979	-0.00436698	-0.00450643	-0.00463873	-0.00476442	-0.00488399	-0.00499787	-0.00510645	-0.0052101	-0.00530914
Py																1	0.948207	0.870879	0.792745	0.713795	0.634015	0.517238	0.409068	0.308589	0.215007	0.127637	0.0978904	0.0713172	0.0474352	0.0258554	0.0062601	0.00546848	0.0047368	0.0040585	0.00342794	0.00284026	0.00248528	0.00214948	0.00183134	0.0015295	0.00124274	0.00096996	0.000710161	0.000462438	0.000225968	0
Yearly growth physical output																	1.01308	0.994852	0.994826	0.994799	0.994772	1.03979	1.03827	1.03686	1.03555	1.03433	1.05971	1.05634	1.05334	1.05064	1.0482	1.04096	1.03935	1.03786	1.03648	1.03519	1.02855	1.02776	1.02701	1.0263	1.02562	1.02498	1.02437	1.02379	1.02324	1.02271
Key indicators - 1.5 CA - CAN
Year	2005	2006	2007	2008	2009	2010	2011	2012	2013	2014	2015	2016	2017	2018	2019	2020	2021	2022	2023	2024	2025	2026	2027	2028	2029	2030	2031	2032	2033	2034	2035	2036	2037	2038	2039	2040	2041	2042	2043	2044	2045	2046	2047	2048	2049	2050
Emissions in tCO2																	7.24788e+07	5.92542e+07	4.60295e+07	3.28049e+07	1.95802e+07	1.59835e+07	1.23868e+07	8.79002e+06	5.19329e+06	1.59656e+06	815623	34688.4	-746246	-1.52718e+06	-2.30811e+06	-2.58646e+06	-2.8648e+06	-3.14315e+06	-3.42149e+06	-3.69984e+06	-3.85554e+06	-4.01124e+06	-4.16695e+06	-4.32265e+06	-4.47835e+06	-4.63406e+06	-4.78976e+06	-4.94546e+06	-5.10117e+06	-5.25687e+06
Electricity in MWh																	6.44578e+08	6.47268e+08	6.49959e+08	6.52649e+08	6.5534e+08	6.71021e+08	6.86703e+08	7.02384e+08	7.18066e+08	7.33747e+08	7.63502e+08	7.93257e+08	8.23012e+08	8.52768e+08	8.82523e+08	9.15965e+08	9.49408e+08	9.82851e+08	1.01629e+09	1.04974e+09	1.06976e+09	1.08978e+09	1.1098e+09	1.12982e+09	1.14985e+09	1.16987e+09	1.18989e+09	1.20991e+09	1.22993e+09	1.24996e+09
Intensity in tCO2e per MWh																	0.112444	0.091545	0.0708191	0.0502642	0.029878	0.0238196	0.018038	0.0125145	0.00723233	0.00217589	0.00106826	4.37291e-05	-0.000906725	-0.00179085	-0.00261536	-0.00282375	-0.00301746	-0.00319799	-0.00336664	-0.00352454	-0.00360412	-0.00368078	-0.00375468	-0.00382595	-0.00389474	-0.00396118	-0.00402538	-0.00408746	-0.00414751	-0.00420564
Py																	1	0.820841	0.643164	0.466953	0.292188	0.240252	0.190688	0.143337	0.0980542	0.0547069	0.0452116	0.0364285	0.0282806	0.0207013	0.013633	0.0118465	0.0101859	0.00863829	0.00719253	0.00583889	0.00515664	0.00449947	0.00386601	0.003255	0.00266527	0.00209572	0.00154534	0.00101318	0.000498343	0
Yearly growth physical output																		1.00417	1.00416	1.00414	1.00412	1.02393	1.02337	1.02284	1.02233	1.02184	1.04055	1.03897	1.03751	1.03615	1.03489	1.03789	1.03651	1.03522	1.03403	1.03291	1.01907	1.01872	1.01837	1.01804	1.01772	1.01741	1.01711	1.01683	1.01655	1.01628
Key indicators - 1.5 CA - POL
Year	2005	2006	2007	2008	2009	2010	2011	2012	2013	2014	2015	2016	2017	2018	2019	2020	2021	2022	2023	2024	2025	2026	2027	2028	2029	2030	2031	2032	2033	2034	2035	2036	2037	2038	2039	2040	2041	2042	2043	2044	2045	2046	2047	2048	2049	2050
Emissions in tCO2																5.14371e+07	5.99575e+07	5.8169e+07	5.63804e+07	5.45918e+07	5.28033e+07	4.35851e+07	3.4367e+07	2.51488e+07	1.59307e+07	6.71251e+06	5.50871e+06	4.3049e+06	3.10109e+06	1.89729e+06	693484	393625	93765	-206095	-505954	-805814
Electricity in MWh																1.57147e+08	1.78787e+08	1.78494e+08	1.782e+08	1.77907e+08	1.77613e+08	1.86644e+08	1.95675e+08	2.04705e+08	2.13736e+08	2.22766e+08	2.38089e+08	2.53413e+08	2.68736e+08	2.84059e+08	2.99382e+08	3.12025e+08	3.24668e+08	3.37311e+08	3.49954e+08	3.62597e+08
Intensity in tCO2e per MWh																0.327318	0.335357	0.325888	0.316388	0.306856	0.297293	0.23352	0.175633	0.122854	0.0745344	0.0301325	0.0231371	0.0169877	0.0115396	0.00667921	0.00231639	0.00126152	0.000288803	-0.000610993	-0.00144577	-0.00222234
Py																1	1.0244	0.995663	0.966834	0.93791	0.90889	0.715368	0.539709	0.379548	0.232921	0.0981819	0.0769541	0.0582935	0.041761	0.0270121	0.0137729	0.0105719	0.00762014	0.00488968	0.00235651	0
Yearly growth physical output																		0.998359	0.998356	0.998354	0.998351	1.05084	1.04838	1.04615	1.04412	1.04225	1.06879	1.06436	1.06047	1.05702	1.05394	1.04223	1.04052	1.03894	1.03748	1.03613
Key indicators - 1.5 CA - JPN
Year	2005	2006	2007	2008	2009	2010	2011	2012	2013	2014	2015	2016	2017	2018	2019	2020	2021	2022	2023	2024	2025	2026	2027	2028	2029	2030	2031	2032	2033	2034	2035	2036	2037	2038	2039	2040	2041	2042	2043	2044	2045	2046	2047	2048	2049	2050
Emissions in tCO2																	479250000	4.18432e+08	3.57613e+08	2.96795e+08	2.35977e+08	2.0461e+08	1.73242e+08	1.41875e+08	1.10508e+08	7.91405e+07	6.55393e+07	5.19381e+07	3.8337e+07	2.47358e+07	1.11346e+07	9.46808e+06	7.80152e+06	6.13496e+06	4.46841e+06	2.80185e+06
Electricity in MWh																	1.00308e+09	9.82521e+08	9.61964e+08	9.41408e+08	9.20852e+08	9.158e+08	9.10748e+08	9.05696e+08	9.00644e+08	8.95593e+08	9.13413e+08	9.31233e+08	9.49054e+08	9.66874e+08	9.84694e+08	1.01285e+09	1.04101e+09	1.06917e+09	1.09732e+09	1.12548e+09
Intensity in tCO2e per MWh																	0.47778	0.425876	0.371753	0.315267	0.256259	0.223422	0.19022	0.156648	0.122699	0.0883666	0.0717521	0.0557735	0.0403949	0.0255833	0.0113077	0.00934794	0.00749419	0.00573808	0.00407209	0.00248947
Py																	1	0.890795	0.776923	0.658077	0.533926	0.464837	0.39498	0.324345	0.252917	0.180683	0.145727	0.112108	0.0797522	0.0485888	0.0185534	0.0144301	0.0105298	0.00683501	0.00332981	0
Yearly growth physical output																		0.979507	0.979078	0.978631	0.978164	0.994514	0.994484	0.994453	0.994422	0.994391	1.0199	1.01951	1.01914	1.01878	1.01843	1.0286	1.0278	1.02705	1.02634	1.02566
Key indicators - 1.5 CA - IDN
Year	2005	2006	2007	2008	2009	2010	2011	2012	2013	2014	2015	2016	2017	2018	2019	2020	2021	2022	2023	2024	2025	2026	2027	2028	2029	2030	2031	2032	2033	2034	2035	2036	2037	2038	2039	2040	2041	2042	2043	2044	2045	2046	2047	2048	2049	2050
Emissions in tCO2																	240267000	2.10475e+08	1.80683e+08	1.50891e+08	1.21099e+08	1.06685e+08	9.22713e+07	7.78574e+07	6.34435e+07	4.90295e+07	4.18464e+07	3.46633e+07	2.74801e+07	2.0297e+07	1.31139e+07	1.08601e+07	8.60638e+06	6.35263e+06	4.09889e+06	1.84515e+06	1.66766e+06	1.49016e+06	1.31267e+06	1.13518e+06	957687	780194	602702	425209	247717	70224.1
Electricity in MWh																	3.08657e+08	3.22366e+08	3.36075e+08	3.49785e+08	3.63494e+08	3.99534e+08	4.35575e+08	4.71616e+08	5.07656e+08	5.43697e+08	5.95381e+08	6.47066e+08	6.98751e+08	7.50435e+08	8.0212e+08	8.61606e+08	9.21091e+08	9.80577e+08	1.04006e+09	1.09955e+09	1.16135e+09	1.22316e+09	1.28496e+09	1.34676e+09	1.40857e+09	1.47037e+09	1.53218e+09	1.59398e+09	1.65578e+09	1.71759e+09
Intensity in tCO2e per MWh																	0.778427	0.652907	0.537627	0.431383	0.333153	0.267024	0.211838	0.165087	0.124973	0.0901781	0.070285	0.0535699	0.0393275	0.027047	0.016349	0.0126045	0.00934367	0.00647847	0.00394101	0.0016781	0.00143596	0.0012183	0.00102157	0.000842894	0.000679901	0.00053061	0.000393363	0.00026676	0.000149607	4.08853e-05
Py																	1	0.838743	0.690641	0.554149	0.427953	0.342996	0.272098	0.212036	0.160502	0.1158	0.0902433	0.0687692	0.0504719	0.0346949	0.0209512	0.0161406	0.0119514	0.00827042	0.00501052	0.00210334	0.00179227	0.00151263	0.00125989	0.00103035	0.00082095	0.000629154	0.000452832	0.000290183	0.000139676	0
Yearly growth physical output																		1.04442	1.04253	1.04079	1.03919	1.09915	1.09021	1.08274	1.07642	1.07099	1.09506	1.08681	1.07988	1.07397	1.06887	1.07416	1.06904	1.06458	1.06066	1.05719	1.05621	1.05322	1.05053	1.0481	1.04589	1.04388	1.04203	1.04034	1.03877	1.03733
Key indicators - 1.5 CA - MYS
Year	2005	2006	2007	2008	2009	2010	2011	2012	2013	2014	2015	2016	2017	2018	2019	2020	2021	2022	2023	2024	2025	2026	2027	2028	2029	2030
Emissions in tCO2															116375000	1.11195e+08	1.06016e+08	1.00836e+08	9.56568e+07	9.04772e+07	8.52977e+07	8.04707e+07	7.56437e+07	7.08167e+07	6.59897e+07	6.11627e+07
Electricity in MWh															175778000	1.82373e+08	1.88967e+08	1.95562e+08	2.02156e+08	2.08751e+08	2.15345e+08	2.23951e+08	2.32556e+08	2.41162e+08	2.49767e+08	2.58373e+08
Intensity in tCO2e per MWh															0.662057	0.609716	0.561028	0.515624	0.473183	0.433422	0.396097	0.359323	0.32527	0.293648	0.264204	0.236722
Py															1	0.876942	0.762473	0.655724	0.55594	0.46246	0.374705	0.288245	0.208184	0.133837	0.0646129	0
Yearly growth physical output																1.03752	1.03616	1.0349	1.03372	1.03262	1.03159	1.03996	1.03843	1.037	1.03568	1.03445
Key indicators - 1.5 CA - PHL
Year	2005	2006	2007	2008	2009	2010	2011	2012	2013	2014	2015	2016	2017	2018	2019	2020	2021	2022	2023	2024	2025	2026	2027	2028	2029	2030	2031	2032	2033	2034	2035	2036	2037	2038	2039	2040	2041	2042	2043	2044	2045	2046	2047	2048	2049	2050
Emissions in tCO2															71259000	6.71691e+07	6.30791e+07	5.89892e+07	5.48993e+07	5.08093e+07	4.67194e+07	4.36279e+07	4.05364e+07	3.74449e+07	3.43534e+07	3.12619e+07	2.75704e+07	2.38788e+07	2.01873e+07	1.64957e+07	1.28042e+07	1.09805e+07	9.15678e+06	7.33307e+06	5.50937e+06	3.68567e+06	3.2587e+06	2.83173e+06	2.40476e+06	1.97779e+06	1.55083e+06	1.10922e+06	667612	226005	-215602	-657209
Electricity in MWh															1.06028e+08	1.08345e+08	1.10663e+08	1.1298e+08	1.15298e+08	1.17615e+08	1.19933e+08	1.24383e+08	1.28834e+08	1.33284e+08	1.37735e+08	1.42186e+08	1.50864e+08	1.59543e+08	1.68222e+08	1.769e+08	1.85579e+08	1.95857e+08	2.06134e+08	2.16412e+08	2.2669e+08	2.36968e+08	2.51552e+08	2.66137e+08	2.80722e+08	2.95307e+08	3.09891e+08	3.20734e+08	3.31576e+08	3.42418e+08	3.5326e+08	3.64102e+08
Intensity in tCO2e per MWh															0.672077	0.619953	0.570012	0.522119	0.476152	0.431996	0.389547	0.350754	0.314641	0.28094	0.249417	0.219867	0.18275	0.14967	0.120004	0.0932488	0.0689959	0.0560639	0.0444214	0.0338848	0.0243036	0.0155535	0.0129544	0.0106401	0.00856635	0.00669742	0.00500442	0.00345838	0.00201345	0.000660026	-0.000610321	-0.00180501
Py															1	0.922651	0.848541	0.777472	0.709259	0.643735	0.580743	0.523176	0.469587	0.419576	0.372798	0.328948	0.273868	0.22478	0.180757	0.141054	0.105064	0.0858739	0.0685971	0.0529614	0.0387435	0.0257589	0.021902	0.0184678	0.0153905	0.0126171	0.0101048	0.00781055	0.00566637	0.00365797	0.00177285	0
Yearly growth physical output																1.02186	1.02139	1.02094	1.02051	1.0201	1.0197	1.03711	1.03578	1.03455	1.03339	1.03231	1.06104	1.05753	1.0544	1.05159	1.04906	1.05538	1.05248	1.04986	1.04749	1.04534	1.06155	1.05798	1.0548	1.05195	1.04939	1.03499	1.0338	1.0327	1.03166	1.03069
Key indicators - 1.5 CA - KOR
[truncated: 239 more rows]

## Sheet: TWN NTP
Data source:	Name	2050 Net Zero Roadmap	Climate Change Administration - Ministry of Environment
[truncated: 24 more rows]

## Sheet: OMN NTP
Data source:	Name	The Sultanate of Oman’s National Strategy for an Orderly Transition to Net Zero
[truncated: 22 more rows]

[truncated: 32 more sheets: NLD NTP, FRA NTP, ESP NTP, IDN NTP, JPN NTP, ARG NTP, THA NTP, KOR NTP, LKA NTP, POL NTP, SRB NTP, MEX NTP, MYS NTP, PHL NTP, ZAF NTP, IND NTP, CAN NTP , Ireland NTP, UK NTP, AUS NTP …]
