# Supplementary material for: Assessing corporate emissions reduction targets against national transition plans
Source: Research Square preprint supplement (doi:10.21203/rs.3.rs-8460132/v1), 2026-01-21
Supplement: Supplementary file 2 [file c70352898dd0ad0e3bd698b8.xlsx]

## Sheet: ReadMe
	Read me: Assessing corporate emissions reduction targets against national transition plans (additional analysis)
	Overview
	Authors	Adrien Rose, Saphira Rekker, Abhinav Jindal, Gireesh Shrimali
	Contact	Adrien Rose, a.p.rose@lse.ac.uk
	Purpose	This dataset underpins additional analysis in Assessing corporate emissions reduction targets against national transition plans. It compiles national decarbonisation pathways for the steel sector in 2 countries and company-level targets for 6 major steel producers. All the data used in the analysis comes from public sources.
	Last updated	This document was last updated in December 2025.
	Table of content
	Sheet name	Description
	📊 Results	Tables and figures included in the Results section of the paper
	📝Analysis	Analysis, raw data, and sources for all companies covered in the paper
	📈 Pathways	Key indicators for all the pathways used as benchmarks in the paper		Word count
	📈 Tabs with ISO Code +"NTP"	Key indicators, raw data, and sources for the specified country.		Results	120
	Lists	Working sheet			91
				Discussion	1079
				Total	1290

## Sheet: Results
Companies	Country	Assessment period	% of national steel output (2024)	Share of budget consumed
				NDC & National Plan	Third party national pathway	IEA Net Zero (global)
BlueScope	AUS	2024-2050	0.518342	1.18816	1.14512	0.805377
Liberty Steel	AUS	2024-2050	0.37485	0.251759	0.419795	0.233137
Total Australia	AUS	2024-2050	0.893192	0.917908	0.854503	0.61893
Tata Steel Limited	IND	2020-2030	0.139433	0.985664	2.09666	1.4503
SAIL	IND	2020-2030	0.133057	1.0585	1.62685	1.20275
JSW Steel	IND	2020-2030	0.151013	0.964276	1.80497	1.40969
Arcelormittal Nippon Steel India	IND	2020-2030	0.0581918	0.914111	1.59412	1.30094
Total India	IND	2020-2030	0.481694	0.992389	1.78984	1.34787
Results should not be compared across scenarios, as the scenarios are defined over different activity perimeters.
Pathways	Region	Issuer	Plan or scenario	Period	Claimed temperature alignment
National Steel Strategy	IND	Regulator	Plan	2024-2030	/
Mission Possible Partnership	IND	Academia	Scenario	2020-2050	1.5
Industry Sector Plan	AUS	Australian Treasury	Plan	2025-2050	/
CSIRO - CCA - 1.5	AUS	Regulator/Academia	Scenario	2025-2050	1.5
IEA Net Zero by 2050	World	IEA	Scenario	2024-2050	1.5

## Sheet: Analysis
									NATIONAL TRANSITION PLANS																																		IEA Net Zero by 2050
company	Indicators	country	sourcetargetsanddata	assumptions	targetyears	targetdescription	historyprojectioncutoff	d	2018	2019	2020	2021	2022	2023	2024	2025	2026	2027	2028	2029	2030	2031	2032	2033	2034	2035	2036	2037	2038	2039	2040	2041	2042	2043	2044	2045	2046	2047	2048	2049	2050		d	2018	2019	2020	2021	2022	2023
BlueScope	emissions in MtCO2e (scope 1+2)	AUS	https://www.bluescope.com/content/dam/bluescope/corporate/bluescope-com/sustainability/documents/FY2024-Climate_Action_Reportv2.pdf		2030, 2050	12% emissions reduction for steelmaking by 2030 compared with 2018 baseline, net zero by 2050	2024							6.65752	6.458	6.57616	6.68964	6.84598	6.99647	7.1411	7.27989	7.13336	6.96394	6.77163	6.55643	6.31834	6.05735	5.85367	5.61476	5.34062	5.03126	4.68666	4.30683	3.89178	3.4415	2.95599	2.43525	1.87928	1.28808	0.661655	0	1.18816							6.65752
BlueScope1	output (Mt)	AUS	https://www.bluescope.com/content/dam/bluescope/corporate/bluescope-com/illawarra/documents/FY2024_PKSW_GHG_and_Water_Use_Disclosure.pdf	Emissions and output for Australian steelmaking activities in 2024			2024							3.21888	3.12655	3.22201	3.31747	3.43679	3.55612	3.67544	3.79477	3.91409	4.03342	4.15274	4.27207	4.39139	4.51072	4.69435	4.87799	5.06163	5.24526	5.4289	5.61253	5.79617	5.97981	6.16344	6.34708	6.53071	6.71435	6.89799	7.08162								3.21888
BlueScope2	intensity	AUS	https://www.bluescope.com/content/dam/bluescope/corporate/bluescope-com/sustainability/documents/FY2024-Climate_Action_Reportv2.pdf	Intensity for Australian steelmaking activities in 2018			2024		2.18					2.06827	2.06553	2.04101	2.01649	1.99197	1.96744	1.94292	1.9184	1.82248	1.72656	1.63064	1.53472	1.4388	1.34288	1.24696	1.15104	1.05512	0.9592	0.86328	0.76736	0.67144	0.57552	0.4796	0.38368	0.28776	0.19184	0.09592	0			2.18					2.06827
BlueScope3	cumulative emissions	AUS	https://www.bluescope.com/content/dam/bluescope/corporate/bluescope-com/illawarra/documents/FY2023_PKSW_GHG_and_Water_Use_DisclosureFeb24.pdf	Emissions and output for Australian steelmaking activities in 2023											6.458	13.0342	19.7238	26.5698	33.5662	40.7073	47.9872	55.1206	62.0845	68.8562	75.4126	81.7309	87.7883	93.642	99.2567	104.597	109.629	114.315	118.622	122.514	125.955	128.911	131.347	133.226	134.514	135.176	135.176
BlueScope4	SDA intensity	AUS	https://www.bluescope.com/content/dam/bluescope/corporate/bluescope-com/illawarra/documents/FY2022_Illawarra_PKSW_GHG_Emissions_and_Water_Use.pdf	Emissions and output for Australian steelmaking activities in 2022				1.98662							2.06553	2.06379	1.96336	1.85613	1.75609	1.66254	1.57488	1.49256	1.41512	1.34212	1.2732	1.20803	1.10488	0.994328	0.8921	0.79729	0.709119	0.626912	0.550085	0.478126	0.410587	0.347072	0.287233	0.230759	0.177374	0.126831	0.0789095		1.4359						TRUE
BlueScope5	SDA cumulative emissions	AUS													6.458	13.1075	19.6209	26.0001	32.2449	38.3555	44.3318	50.1738	55.8816	61.4551	66.8943	72.1992	77.183	81.8508	86.2024	90.238	93.9575	97.361	100.448	103.22	105.675	107.814	109.637	111.144	112.335	113.21	113.769
BlueScope6	marketshare		https://www.bluescope.com/content/dam/bluescope/corporate/bluescope-com/illawarra/documents/2021_Illawarra_PKSW_Water_Use_and_PKSW_GHG_Disclosure.pdf	Emissions and output for Australian steelmaking activities in 2020											0.518342	0.518797	0.515622	0.516244	0.516826	0.517371	0.517883	0.518365	0.518819	0.519248	0.519653	0.520037	0.513272	0.514059	0.514788	0.515467	0.516099	0.51669	0.517244	0.517764	0.518253	0.518713	0.519148	0.519558	0.519947	0.520316	0.520666
BlueScope7	my														1	0.999122	1.00528	1.00406	1.00293	1.00188	1.00089	0.999955	0.99908	0.998255	0.997476	0.99674	1.00988	1.00833	1.0069	1.00558	1.00435	1.0032	1.00212	1.00112	1.00017	0.999284	0.998448	0.997658	0.996912	0.996206	0.995536
BlueScope8	consumes total budget Y/N?														FALSE	FALSE	FALSE	FALSE	FALSE	FALSE	FALSE	FALSE	FALSE	FALSE	FALSE	FALSE	FALSE	FALSE	FALSE	FALSE	FALSE	TRUE	TRUE	TRUE	TRUE	TRUE	TRUE	TRUE	TRUE	TRUE	TRUE
BlueScope9	Intensity gap with SDA intensity														1	0.994401	1.00524	1.02191	1.04098	1.06132	1.08246	1.09859	1.111	1.12043	1.12734	1.13202	1.1374	1.14406	1.15144	1.15913	1.16679	1.17414	1.18093	1.18692	1.19191	1.19568	1.19801	1.19868	1.19743	1.19403	1.18816
Liberty Steel	emissions in MtCO2e (scope 1+2)	AUS	https://libertysteelgroup.com/wp-content/uploads/2023/11/Liberty-Steel-Sustainability-Report-2023.pdf	Company-wide target used at the country level. Page 29 of SR2023. Intensity in 2021 and 2021 was assumed to be equal to intensity in 2022 due to lack of data. Emissions in 2020 was assumed to be the same as in 2020 due to lack of data.	2026, 2030	Absolute emissions fall by 45% by 2026, carbon intensity falls by 75% by 2030	2023						2.87	2.817	2.49983	2.18267	1.8655	1.64638	1.40738	1.14851	0.869764	0	0	0	0	0	0	0	0	0	0	0	0	0	0	0	0	0	0	0	0	0.251759							2.87
Liberty Steel1	output (Mt)	AUS	https://libertysteelgroup.com/wp-content/uploads/2023/11/Liberty-Steel-Sustainability-Report-2023.pdf	Emissions and output in 2023			2023						2.26385	2.192	2.26103	2.33007	2.3991	2.48539	2.57169	2.65798	2.74427	2.83056	2.91686	3.00315	3.08944	3.17573	3.26203	3.39483	3.52763	3.66043	3.79323	3.92603	4.05883	4.19163	4.32443	4.45723	4.59003	4.72283	4.85563	4.98843	5.12123								2.26385
Liberty Steel2	intensity	AUS	https://libertysteelgroup.com/wp-content/uploads/2022/12/Liberty-Steel-Sustainability-Report-2022.pdf	Emissions and output in 2022, Emissions from 2021 were estimated using graphical analysis from p.24.			2023						1.26775	1.28513	1.10562	0.93674	0.777583	0.662422	0.54726	0.432099	0.316938	0	0	0	0	0	0	0	0	0	0	0	0	0	0	0	0	0	0	0	0								1.26775
Liberty Steel3	cumulative emissions	AUS													2.49983	4.6825	6.548	8.19438	9.60176	10.7503	11.62	11.62	11.62	11.62	11.62	11.62	11.62	11.62	11.62	11.62	11.62	11.62	11.62	11.62	11.62	11.62	11.62	11.62	11.62	11.62	11.62
Liberty Steel4	SDA intensity	AUS						1.02671							1.10562	1.10471	1.05281	0.997391	0.94569	0.897345	0.852041	0.809499	0.769474	0.731749	0.696132	0.66245	0.60914	0.552006	0.499174	0.450175	0.404607	0.362122	0.322417	0.285228	0.250324	0.217499	0.186573	0.157387	0.129797	0.103676	0.0789095		0.655498						TRUE
Liberty Steel5	SDA cumulative emissions	AUS						0.251759							2.49983	5.07389	7.5997	10.0786	12.5106	14.8957	17.234	19.5253	21.7698	23.9673	26.118	28.2217	30.2088	32.0827	33.8436	35.4915	37.0262	38.4479	39.7566	40.9521	42.0346	43.0041	43.8605	44.6038	45.234	45.7512	46.1553
Liberty Steel6	marketshare														0.37485	0.37518	0.372883	0.373333	0.373754	0.374148	0.374519	0.374867	0.375196	0.375506	0.375799	0.376076	0.371184	0.371753	0.37228	0.372771	0.373229	0.373656	0.374057	0.374432	0.374786	0.375119	0.375433	0.37573	0.376011	0.376278	0.376531
Liberty Steel7	my														1	0.999122	1.00528	1.00406	1.00293	1.00188	1.00089	0.999955	0.99908	0.998255	0.997476	0.99674	1.00988	1.00833	1.0069	1.00558	1.00435	1.0032	1.00212	1.00112	1.00017	0.999284	0.998448	0.997658	0.996912	0.996206	0.995536
Liberty Steel8	consumes total budget Y/N?														FALSE	FALSE	FALSE	FALSE	FALSE	FALSE	FALSE	FALSE	FALSE	FALSE	FALSE	FALSE	FALSE	FALSE	FALSE	FALSE	FALSE	FALSE	FALSE	FALSE	FALSE	FALSE	FALSE	FALSE	FALSE	FALSE	FALSE
Liberty Steel9	Intensity gap with SDA intensity														1	0.922862	0.861614	0.813047	0.767489	0.721701	0.674252	0.595127	0.53377	0.484829	0.444906	0.411741	0.384658	0.36219	0.343345	0.327404	0.313833	0.302228	0.29228	0.283747	0.276439	0.270208	0.264932	0.260517	0.256887	0.253983	0.251759
Total Australia	emissions in MtCO2e (scope 1+2)														8.95783	8.75883	8.55514	8.49236	8.40385	8.28961	8.14965	7.13336	6.96394	6.77163	6.55643	6.31834	6.05735	5.85367	5.61476	5.34062	5.03126	4.68666	4.30683	3.89178	3.4415	2.95599	2.43525	1.87928	1.28808	0.661655	0	0.917908
Total Australia1	output (Mt)														5.38758	5.55208	5.71657	5.92219	6.12781	6.33342	6.53904	6.74466	6.95028	7.15589	7.36151	7.56713	7.77274	8.08918	8.40562	8.72205	9.03849	9.35493	9.67136	9.9878	10.3042	10.6207	10.9371	11.2535	11.57	11.8864	12.2029
Total Australia2	intensity														1.66268	1.57758	1.49655	1.43399	1.37143	1.30887	1.24631	1.05763	1.00197	0.946301	0.890636	0.834972	0.779307	0.723642	0.667977	0.612313	0.556648	0.500983	0.445318	0.389653	0.333989	0.278324	0.222659	0.166994	0.11133	0.0556648	0
Total Australia3	cumulative emissions														8.95783	17.7167	26.2718	34.7642	43.168	51.4576	59.6073	66.7406	73.7046	80.4762	87.0326	93.351	99.4083	105.262	110.877	116.217	121.249	125.935	130.242	134.134	137.575	140.531	142.967	144.846	146.134	146.796	146.796
Total Australia4	SDA intensity							1.58377							1.66268	1.66129	1.58123	1.49574	1.41598	1.34141	1.27152	1.2059	1.14416	1.08596	1.03102	0.979065	0.89683	0.808696	0.727199	0.651615	0.581323	0.515787	0.454539	0.397172	0.343328	0.292693	0.244988	0.199966	0.157407	0.117113	0.0789095		1.11427						TRUE
Total Australia5	SDA cumulative emissions							0.917908							8.95783	18.1814	27.2206	36.0787	44.7555	53.2512	61.5658	69.6992	77.6514	85.4224	93.0123	100.421	107.392	113.933	120.046	125.729	130.984	135.809	140.205	144.172	147.71	150.818	153.498	155.748	157.569	158.961	159.924
Total Australia6	marketshare														0.893192	0.893977	0.888505	0.889577	0.89058	0.89152	0.892402	0.893232	0.894015	0.894753	0.895452	0.896114	0.884456	0.885812	0.887069	0.888238	0.889328	0.890347	0.891301	0.892196	0.893038	0.893832	0.894581	0.895289	0.895959	0.896594	0.897198
Total Australia7	my														1	0.999122	1.00528	1.00406	1.00293	1.00188	1.00089	0.999955	0.99908	0.998255	0.997476	0.99674	1.00988	1.00833	1.0069	1.00558	1.00435	1.0032	1.00212	1.00112	1.00017	0.999284	0.998448	0.997658	0.996912	0.996206	0.995536
Total Australia8	consumes total budget Y/N?														FALSE	FALSE	FALSE	FALSE	FALSE	FALSE	FALSE	FALSE	FALSE	FALSE	FALSE	FALSE	FALSE	FALSE	FALSE	FALSE	FALSE	FALSE	FALSE	FALSE	FALSE	FALSE	FALSE	FALSE	FALSE	FALSE	FALSE
Total Australia9	Intensity gap with SDA intensity														1	0.974436	0.965143	0.963565	0.964529	0.966318	0.968188	0.957553	0.949173	0.942097	0.935711	0.929596	0.92566	0.92389	0.923618	0.924345	0.925677	0.927298	0.928941	0.930376	0.931392	0.931794	0.931393	0.930002	0.927428	0.923469	0.917908
Tata Steel Limited	emissions in MtCO2e (scope 1+2)	India	https://www.tatasteel.com/media/21241/tata-steel-limited-ir-2024.pdf		2045	Net Zero	2024				32.2	30.4	47.9	48	51.8	55.6411	58.8515	61.431	63.3798	64.6978	65.3851																					0.985664				32.2	30.4	47.9	48
Tata Steel Limited1	output (Mt)	India	https://www.tatasteel.com/media/21241/tata-steel-limited-ir-2024.pdf				2024				13.16	12.19	18.38	18.97	20.12	22.6926	25.2651	27.8377	30.4102	32.9828	35.5553																									13.16	12.19	18.38	18.97
Tata Steel Limited2	intensity	India					2024				2.44681	2.49385	2.60609	2.53031	2.57455	2.45195	2.32936	2.20676	2.08416	1.96156	1.83897																									2.44681	2.49385	2.60609	2.53031
Tata Steel Limited3	cumulative emissions	India									32.2	62.6	110.5	158.5	210.3	265.941	324.793	386.224	449.603	514.301	579.686																									32.2	62.6	110.5	158.5
Tata Steel Limited4	SDA intensity	India						0.246809	TRUE		2.44681	2.44643	2.34776	2.32563	2.30803	2.29214	2.27943	2.26355	2.24448	2.22224	2.2																						0.986373		TRUE	2.44681	2.06517	1.55634	1.51642
Tata Steel Limited5	SDA cumulative emissions	India							TRUE		32.2	62.022	105.174	149.291	195.729	247.743	305.333	368.345	436.6	509.896	588.118																									32.2	57.3744	85.98	114.747
Tata Steel Limited6	marketshare	India									0.120582	0.105855	0.151679	0.149139	0.139433	0.139433	0.139433	0.139433	0.139433	0.139433	0.139433																									0.0070412	0.00648577	0.00972487	0.00996847
Tata Steel Limited7	my	India									1	1.13912	0.794984	0.808525	0.864807	0.864807	0.864807	0.864807	0.864807	0.864807	0.864807																									1	1.08564	0.724041	0.706347
Tata Steel Limited8	consumes total budget Y/N?	India									FALSE	FALSE	FALSE	FALSE	FALSE	FALSE	FALSE	FALSE	FALSE	FALSE	FALSE																									FALSE	FALSE	FALSE	FALSE
Tata Steel Limited9	Intensity gap with SDA intensity	India									1	1.00932	1.05064	1.06168	1.07445	1.07346	1.06373	1.04854	1.02978	1.00864	0.985664																									1	1.09108	1.28518	1.38131
SAIL	emissions in MtCO2e (scope 1+2)	India	https://www.sail.co.in/sites/default/files/ticker/2024-09/SAIL_Annual_Report2023-24.pdf	Emissions intensity in 2020 was assumed to be equal to the intensity in 2021 due to a lack of data	2031, 2070	Reach carbon intensity of 2.19, net zero by 2070	2024				46.5771	42.82	48.5582	50.6248	55.0687	60.0119	64.4794	68.4713	71.9875	75.028	77.5928																					1.0585				46.5771	42.82	48.5582	50.6248
SAIL1	output (Mt)	India	https://www.sail.co.in/sites/default/files/ticker/2024-09/SAIL_Annual_Report2023-24.pdf	GHG emissions in 2023 and 2024, output in 2024			2024				16.55	15.215	17.366	18.3	19.2	21.6549	24.1098	26.5648	29.0197	31.4746	33.9295																									16.55	15.215	17.366	18.3
SAIL2	intensity	India	https://sail.co.in/sites/default/files/2023-09/SAIL_Annual-Report-2022-2023.pdf	Output in 2023, Emissions in 2022			2024				2.81433	2.81433	2.79617	2.76638	2.86816	2.77128	2.6744	2.57752	2.48064	2.38376	2.28688	2.19																								2.81433	2.81433	2.79617	2.76638
SAIL3	cumulative emissions	India	https://sail.co.in/sites/default/files/2024-03/Sail-Annual-Report_2021-22-%281%29_3.pdf	Output in 2022, Emissions in 2021							46.5771	89.3971	137.955	188.58	243.649	303.661	368.14	436.611	508.599	583.627	661.22																									46.5771	89.3971	137.955	188.58
SAIL4	SDA intensity	India	https://sail.co.in/sites/default/files/2021-09/SAILAnnualReport2020-21.pdf	Output in 2021				0.614328	TRUE		2.81433	2.81803	2.68953	2.60767	2.55436	2.50224	2.46056	2.40844	2.34591	2.27296	2.2																						1.35389		TRUE	2.81433	2.29677	1.63566	1.56061
SAIL5	SDA cumulative emissions	India	https://sail.co.in/sites/default/files/2024-03/SAIL48AGMAR201920.pdf	Output in 2020					TRUE		46.5771	89.4535	136.16	183.88	232.924	287.11	346.433	410.413	478.491	550.031	624.676																									46.5771	81.5226	109.927	138.487
SAIL6	marketshare	India									0.151644	0.132124	0.143311	0.143871	0.133057	0.133057	0.133057	0.133057	0.133057	0.133057	0.133057																									0.008855	0.00809524	0.00918836	0.0096164
SAIL7	my	India									1	1.14774	1.05815	1.05403	1.13969	1.13969	1.13969	1.13969	1.13969	1.13969	1.13969																									1	1.09385	0.96372	0.920824
SAIL8	consumes total budget Y/N?	India									FALSE	FALSE	FALSE	FALSE	FALSE	FALSE	FALSE	FALSE	FALSE	FALSE	TRUE																									FALSE	FALSE	FALSE	FALSE
SAIL9	Intensity gap with SDA intensity	India									1	0.99937	1.01319	1.02556	1.04605	1.05765	1.06266	1.06383	1.06292	1.06108	1.0585																									1	1.09659	1.25497	1.36172
JSW Steel	emissions in MtCO2e (scope 1+2)	India	https://www.jswsteel.in/sites/default/files/assets/downloads/steel/IR/Financial%20Performance/Annual%20Reports%20Steel/23-24/Integrated-Annual-Report-FY-2023-24.pdf	ESG data seems to only cover Indian operations	2030, 2050	reach 1.95 tCO2/tcs intensity by 2030, net zero by 2070	2024				40.52	37.52	44.21	49.36	53.17	57.9612	62.2973	66.1784	69.6044	72.5753	75.0911																					0.964276				40.52	37.52	44.21	49.3594
JSW Steel1	output (Mt)	India	https://www.jsw.in/groups/sustainability-homepage	All reported indicators come from the JSW Steel ESG DataBook 2024			2024				16.0794	15.0683	17.684	20.9153	21.791	24.5772	27.3634	30.1496	32.9358	35.722	38.5082																									16.0794	15.0683	17.684	20.915
JSW Steel2	intensity	India					2024				2.52	2.49	2.5	2.36	2.44	2.35833	2.27667	2.195	2.11333	2.03167	1.95																									2.52	2.49	2.5	2.36
JSW Steel3	cumulative emissions	India									40.52	78.04	122.25	171.61	224.78	282.741	345.039	411.217	480.821	553.397	628.488																									40.52	78.04	122.25	171.609
JSW Steel4	SDA intensity	India						0.32	TRUE		2.52	2.51582	2.44329	2.38052	2.35801	2.33477	2.31618	2.29295	2.26506	2.23253	2.2																						1.05956		TRUE	2.52	2.10254	1.59127	1.52708
JSW Steel5	SDA cumulative emissions	India							TRUE		40.52	78.4291	121.636	171.425	222.809	280.191	343.569	412.701	487.303	567.053	651.771																									40.52	72.2016	100.342	132.281
JSW Steel6	marketshare	India									0.147332	0.13085	0.145935	0.164432	0.151013	0.151013	0.151013	0.151013	0.151013	0.151013	0.151013																									0.00860319	0.00801717	0.00935661	0.0109905
JSW Steel7	my	India									1	1.12596	1.00957	0.896005	0.975626	0.975626	0.975626	0.975626	0.975626	0.975626	0.975626																									1	1.0731	0.919477	0.782782
JSW Steel8	consumes total budget Y/N?	India									FALSE	FALSE	FALSE	FALSE	FALSE	FALSE	FALSE	FALSE	FALSE	FALSE	FALSE																									FALSE	FALSE	FALSE	FALSE
JSW Steel9	Intensity gap with SDA intensity	India									1	0.995039	1.00505	1.00108	1.00885	1.0091	1.00428	0.996404	0.9867	0.975917	0.964276																												1.29731
Arcelormittal Nippon Steel India	emissions in MtCO2e (scope 1+2)	India	https://www.amns.in/storage/sustainability/Sustainability%20Report%202024.pdf?id=1	The Parent Company has a group-wide target to reach net zero by 2050, though AMNS only mentions being inspired by the decarbonisation effort of the company and aiming to align with India's 2070 target. Therefore, we assumed that AMNS aims to reach net zero by 2070	2030, 2070	reach 1.8 intensity by 2030, net zero by 2070	2023				14.8209	16.26	15.23	16.21	18.2215	19.9673	21.5807	23.0617	24.4102	25.6263	26.7101																					0.914111				14.8209	16.26	15.23	16.21
Arcelormittal Nippon Steel India1	output (Mt)	India	https://www.amns.in/storage/sustainability/Climate-Action-Report-2024-AMNS.pdf	GHG emissions in 2021, 2022, 2023. Intensity from 2020 to 2024.			2023				6.5579	7.29148	6.67982	7.40183	8.39702	9.47067	10.5443	11.618	12.6916	13.7653	14.8389																									6.5579	7.29148	6.67982	7.40183
Arcelormittal Nippon Steel India2	intensity	India	https://www.amns.in/storage/sustainability/Sustainability_Reports/2023/CY22.pdf	GHG Emissions in 2020			2024				2.26	2.23	2.28	2.19	2.17	2.10833	2.04667	1.985	1.92333	1.86167	1.8																									2.26	2.23	2.28	2.19
Arcelormittal Nippon Steel India3	cumulative emissions	India									14.8209	31.0809	46.3109	62.5209	80.7424	100.71	122.29	145.352	169.762	195.389	222.099																									14.8209	31.0809	46.3109	62.5209
Arcelormittal Nippon Steel India4	SDA intensity	India						0.06	TRUE		2.26	2.24991	2.24925	2.23901	2.23136	2.22675	2.22306	2.21845	2.21291	2.20646	2.2																						0.799565		TRUE	2.26	1.86883	1.56704	1.51839
Arcelormittal Nippon Steel India5	SDA cumulative emissions	India							TRUE		14.8209	31.226	46.2506	62.8234	81.5601	102.649	126.09	151.863	179.949	210.321	242.967																									14.8209	28.4474	38.9149	50.1538
Arcelormittal Nippon Steel India6	marketshare	India									0.0600887	0.0633177	0.0551245	0.0581918	0.0581918	0.0581918	0.0581918	0.0581918	0.0581918	0.0581918	0.0581918																									0.00350878	0.00387948	0.0035343	0.00388956
Arcelormittal Nippon Steel India7	my	India									1	0.949003	1.09005	1.0326	1.0326	1.0326	1.0326	1.0326	1.0326	1.0326	1.0326																									1	0.904445	0.992778	0.902102
Arcelormittal Nippon Steel India8	consumes total budget Y/N?	India									FALSE	FALSE	FALSE	FALSE	FALSE	FALSE	FALSE	FALSE	FALSE	FALSE	FALSE																									FALSE	FALSE	FALSE	FALSE
Arcelormittal Nippon Steel India9	Intensity gap with SDA intensity	India									1	0.995351	1.0013	0.995185	0.989974	0.981109	0.96987	0.957124	0.943392	0.929001	0.914111																												1.24658
Total India	emissions in MtCO2e (scope 1+2)										134.118	127	155.898	164.195	178.26	193.582	207.209	219.142	229.382	237.927	244.779																					0.992389				134.118	127	155.898	164.194
Total India1	output (Mt)										52.3473	49.7648	60.1098	65.5871	69.508	78.3953	87.2827	96.17	105.057	113.945	122.832																									52.3473	49.7648	60.1098	65.5868
Total India2	intensity										2.56208	2.55201	2.59356	2.50346	2.5646	2.4693	2.374	2.2787	2.1834	2.0881	1.99279																									2.56208	2.55201	2.59356	2.50346
Total India3	cumulative emissions										134.118	261.118	417.016	581.211	759.471	953.053	1160.26	1379.4	1608.79	1846.71	2091.49																									134.118	261.118	417.016	581.21
Total India4	SDA intensity							0.362082	TRUE		2.56208	2.55226	2.46365	2.41205	2.38248	2.35564	2.33417	2.30734	2.27514	2.23757	2.2																						1.10165		TRUE	2.56208	2.11853	1.59072	1.53237
Total India5	SDA cumulative emissions								TRUE		134.118	261.131	409.22	567.42	733.021	917.692	1121.43	1343.32	1582.34	1837.3	2107.53																									134.118	239.546	335.164	435.667
Total India6	marketshare										0.479647	0.432147	0.49605	0.515634	0.481694	0.481694	0.481694	0.481694	0.481694	0.481694	0.481694																									0.0280082	0.0264777	0.0318041	0.034465
Total India7	my										1	1.10992	0.966934	0.930209	0.99575	0.99575	0.99575	0.99575	0.99575	0.99575	0.99575																									1	1.0578	0.880645	0.812656
Total India8	consumes total budget Y/N?										FALSE	FALSE	FALSE	FALSE	FALSE	FALSE	FALSE	FALSE	FALSE	FALSE	FALSE																									FALSE	FALSE	FALSE	FALSE
Total India9	Intensity gap with SDA intensity										1	0.999952	1.01905	1.02431	1.03608	1.03853	1.03463	1.02686	1.01671	1.00512	0.992389																												1.33407
[truncated: 61 more columns]

## Sheet: Pathways
Key indicators	Australian Plan
Year	2020	2021	2022	2023	2024	2025	2026	2027	2028	2029	2030	2031	2032	2033	2034	2035	2036	2037	2038	2039	2040	2041	2042	2043	2044	2045	2046	2047	2048	2049	2050
Emissions in MtCO2					8.45479	8.70528	8.53833	8.37138	8.20443	8.03748	7.87053	7.70358	7.53663	7.36968	7.20273	7.03578	6.63827	6.24077	5.84327	5.44577	5.04827	4.65077	4.25327	3.85576	3.45826	3.06076	2.66326	2.26576	1.86826	1.47076	1.07325
Output in Mt crude steel	5.317	5.49571	5.67442	5.85312	6.03183	6.21054	6.43392	6.65731	6.88069	7.10408	7.32746	7.55085	7.77423	7.99761	8.221	8.44438	8.78816	9.13194	9.47572	9.8195	10.1633	10.5071	10.8508	11.1946	11.5384	11.8822	12.226	12.5697	12.9135	13.2573	13.6011
Emission Intensity (tCO2/t crude steel)					1.4017	1.4017	1.32708	1.25747	1.19238	1.13139	1.07411	1.02023	0.969437	0.921484	0.876137	0.83319	0.755365	0.6834	0.616657	0.554587	0.496716	0.442632	0.391976	0.34443	0.299718	0.257593	0.217836	0.180255	0.144674	0.110939	0.0789095
Py starting in 2024					1	1	0.943592	0.89097	0.841765	0.795654	0.752355	0.711618	0.673221	0.63697	0.602689	0.570221	0.511387	0.456983	0.406527	0.359603	0.315854	0.274967	0.236672	0.200728	0.166927	0.135081	0.105026	0.0766152	0.0497171	0.0242139	0
Yearly growth physical output		1.03361	1.03252	1.03149	1.03053	1.02963	1.03597	1.03472	1.03355	1.03247	1.03144	1.03049	1.02958	1.02873	1.02793	1.02717	1.04071	1.03912	1.03765	1.03628	1.03501	1.03383	1.03272	1.03168	1.03071	1.02979	1.02893	1.02812	1.02735	1.02662	1.02593
Key indicators	AUS_CSIRO_1.5
Year	2020	2021	2022	2023	2024	2025	2026	2027	2028	2029	2030	2031	2032	2033	2034	2035	2036	2037	2038	2039	2040	2041	2042	2043	2044	2045	2046	2047	2048	2049	2050
Emissions in MtCO2					9.64874	9.93461	10.6945	11.4545	12.2144	12.9744	13.7343	13.714	13.6938	13.6735	13.6533	13.633	11.3261	9.0192	6.7123	4.4054	2.09849	2.16532	2.23215	2.29897	2.3658	2.43263	2.49063	2.54863	2.60664	2.66464	2.72264
Output in Mt crude steel	5.317	5.49571	5.67442	5.85312	6.03183	6.21054	6.6467	7.08287	7.51904	7.9552	8.39137	8.73297	9.07456	9.41616	9.75776	10.0994	10.441	10.7825	11.1241	11.4657	11.8073	12.1489	12.4905	12.8321	13.1737	13.5153	13.8569	14.1985	14.5401	14.8817	15.2233
Emission Intensity (tCO2/t crude steel)					1.59964	1.59964	1.609	1.61721	1.62447	1.63093	1.63672	1.57038	1.50903	1.45213	1.39922	1.34989	1.08478	0.836463	0.603399	0.384223	0.177728	0.178231	0.178707	0.179158	0.179585	0.17999	0.179739	0.1795	0.179272	0.179055	0.178847
Py starting in 2025					1	1	1.00659	1.01237	1.01748	1.02202	1.0261	0.979405	0.936227	0.896182	0.858941	0.824219	0.637624	0.462852	0.298814	0.14455	-0.000787794	-0.000433485	-9.85551e-05	0.000218543	0.000519196	0.000804651	0.000627852	0.00045956	0.000299176	0.000146154	0
Yearly growth physical output		1.03361	1.03252	1.03149	1.03053	1.02963	1.07023	1.06562	1.06158	1.05801	1.05483	1.04071	1.03912	1.03764	1.03628	1.03501	1.03382	1.03272	1.03168	1.03071	1.02979	1.02893	1.02812	1.02735	1.02662	1.02593	1.02527	1.02465	1.02406	1.02349	1.02295
Key indicators	India Steel NDC
Year	2020	2021	2022	2023	2024	2025	2026	2027	2028	2029	2030
Emissions in MtCO2	313.418	321.154	327.892	333.631	366.519	405.245	443.938	479.159	510.353	536.968	561
Output in Mt crude steel	109.137	115.157	121.177	127.197	144.299	162.749	181.199	199.649	218.1	236.55	255
Emission Intensity (tCO2/t crude steel)	2.87178	2.78884	2.70589	2.62295	2.54	2.49	2.45	2.4	2.34	2.27	2.2
Py starting in 2025	1	0.876529	0.753059	0.629588	0.506118	0.431689	0.372145	0.297716	0.208401	0.104201	0
Yearly growth physical output		1.05516	1.05228	1.04968	1.13445	1.12786	1.11337	1.10182	1.09241	1.0846	1.078
Key indicators	India_MPP
Year	2020	2021	2022	2023	2024	2025	2026	2027	2028	2029	2030	2031	2032	2033	2034	2035	2036	2037	2038	2039	2040	2041	2042	2043	2044	2045	2046	2047	2048	2049	2050
Emissions in tCO2	169.761	211.567	205.275	198.982	192.69	229.971	231.519	230.798	227.808	222.548	215.02	0	0	0	0	0	0	0	0	0	0	0	0	0	0	0	0	0	0	0	0
Output in t crude steel	99.1736	127.273	127.273	127.273	127.273	157.025	169.008	180.992	192.975	204.959	216.942	0	0	0	0	0	0	0	0	0	0	0	0	0	0	0	0	0	0	0	0
Emission Intensity (tCO2/t crude steel)	1.71175	1.66231	1.61287	1.56343	1.51399	1.46455	1.36987	1.27519	1.1805	1.08582	0.991138	0	0	0	0	0	0	0	0	0	0	0	0	0	0	0	0	0	0	0	0
Py starting in 2020	1	0.931392	0.862783	0.794175	0.725566	0.656958	0.525566	0.394175	0.262783	0.131392	0	0	0	0	0	0	0	0	0	0	0	0	0	0	0	0	0	0	0	0	0
Yearly growth physical output	0	1.28333	1	1	1	1.23377	1.07632	1.0709	1.06621	1.0621	1.05847	0	0	0	0	0	0	0	0	0	0	0	0	0	0	0	0	0	0	0	0
Key indicators	IEA Net Zero by 2050
Year	2020	2021	2022	2023	2024	2025	2026	2027	2028	2029	2030	2031	2032	2033	2034	2035	2036	2037	2038	2039	2040	2041	2042	2043	2044	2045	2046	2047	2048	2049	2050
Emissions in MtCO2	2507	2618.5	2730	2761	2759.43	2757.86	2756.29	2754.71	2753.14	2751.57	2750	2667.3	2584.6	2501.9	2419.2	2336.5	2253.8	2171.1	2088.4	2005.7	1923	1853.1	1783.2	1713.3	1643.4	1573.5	1503.6	1433.7	1363.8	1293.9	1224
Output in Mt crude steel	1869	1879.5	1890	1903	1900.14	1897.29	1894.43	1891.57	1888.71	1885.86	1883	1889.3	1895.6	1901.9	1908.2	1914.5	1920.8	1927.1	1933.4	1939.7	1946	1945.8	1945.6	1945.4	1945.2	1945	1944.8	1944.6	1944.4	1944.2	1944
Emission Intensity (tCO2/t crude steel)	1.34136	1.39319	1.44444	1.45087	1.45222	1.45358	1.45494	1.45631	1.45768	1.45906	1.46044	1.41179	1.36347	1.31547	1.26779	1.22042	1.17337	1.12662	1.08017	1.03403	0.988181	0.952359	0.91653	0.880693	0.844849	0.808997	0.773139	0.737272	0.701399	0.665518	0.62963
Py (2025-2050)					1	1.00165	1.00331	1.00497	1.00664	1.00831	1.00999	0.950852	0.892111	0.83376	0.775794	0.71821	0.661003	0.60417	0.547708	0.491612	0.43588	0.392332	0.348776	0.30521	0.261635	0.218052	0.17446	0.130858	0.0872477	0.0436283	0
Py (2024-2030)	1	0.564728	0.134292	0.0803553	0.0689795	0.0575695	0.0461251	0.034646	0.0231323	0.0115837
Yearly growth physical output				1.00688	0.998499	0.998496	0.998494	0.998492	0.99849	0.998487	0.998485	1.00335	1.00333	1.00332	1.00331	1.0033	1.00329	1.00328	1.00327	1.00326	1.00325	0.999897	0.999897	0.999897	0.999897	0.999897	0.999897	0.999897	0.999897	0.999897	0.999897

## Sheet: India_NTP
Key indicators
Year		2020	2021	2022	2023	2024	2025	2026	2027	2028	2029	2030
Emissions in tCO2		313.418	321.154	327.892	333.631	366.519	405.245	443.938	479.159	510.353	536.968	561
Output in t crude steel		109.137	115.157	121.177	127.197	144.299	162.749	181.199	199.649	218.1	236.55	255
Emission Intensity (tCO2/t crude steel)		2.87178	2.78884	2.70589	2.62295	2.54	2.49	2.45	2.4	2.34	2.27	2.2
Py starting in 2024		1	0.876529	0.753059	0.629588	0.506118	0.431689	0.372145	0.297716	0.208401	0.104201	0
Yearly growth physical output			1.05516	1.05228	1.04968	1.13445	1.12786	1.11337	1.10182	1.09241	1.0846	1.078
Sources for intensity: Greening the steel sector in India	https://steel.gov.in/sites/default/files/2025-03/GSI%20Report.pdf	https://steel.gov.in/sites/default/files/2025-03/GSI%20Report.pdf
Sources for output 2030: National Steel Policy 2017
Sources for output first year	https://steel.gov.in/sites/default/files/2025-04/Steel_English_AR_2024%20%281%29.pdf
Assumption
Yearly growth in emissions intensity from the MPP scenario was used to estimate historical emissions intensity in this scenario

## Sheet: India_MPP
Key indicators
Year	2020	2021	2022	2023	2024	2025	2026	2027	2028	2029	2030	2031	2032	2033	2034	2035	2036	2037	2038	2039	2040	2041	2042	2043	2044	2045	2046	2047	2048	2049	2050
Emissions in tCO2	169.761	211.567	205.275	198.982	192.69	229.971	231.519	230.798	227.808	222.548	215.02
Output in t crude steel	99.1736	127.273	127.273	127.273	127.273	157.025	169.008	180.992	192.975	204.959	216.942
Emission Intensity (tCO2/t crude steel)	1.71175	1.66231	1.61287	1.56343	1.51399	1.46455	1.36987	1.27519	1.1805	1.08582	0.991138
Py starting in 2020	1	0.931392	0.862783	0.794175	0.725566	0.656958	0.525566	0.394175	0.262783	0.131392	0
Yearly growth physical output		1.28333	1	1	1	1.23377	1.07632	1.0709	1.06621	1.0621	1.05847
Yearly growth intensity	#VALUE!	0.971117	0.970258	0.969346	0.968377
Raw data	2020	2025	2030
Source	https://3stepsolutions.s3-accelerate.amazonaws.com/assets/custom/010856/downloads/Making-Net-Zero-Steel-possible.pdf
Graphical analysis = Intensity	Reference	2020	2025	2030
Cm	10.72	7.34	6.28	4.25
Intensity	2.5	1.71175	1.46455	0.991138
Graphical analysis = production	Reference	2020	2021	2022	2023	2024	2025	2030
Cm	9.68	2.4	3.08	3.08	3.08	3.08	3.8	5.25
Production	400	99.1736	127.273	127.273	127.273	127.273	157.025	216.942

## Sheet: AUS_NTP
Key indicators
Year		2020	2021	2022	2023	2024	2025	2026	2027	2028	2029	2030	2031	2032	2033	2034	2035	2036	2037	2038	2039	2040	2041	2042	2043	2044	2045	2046	2047	2048	2049	2050
Emissions in MtCO2						8.45479	8.70528	8.53833	8.37138	8.20443	8.03748	7.87053	7.70358	7.53663	7.36968	7.20273	7.03578	6.63827	6.24077	5.84327	5.44577	5.04827	4.65077	4.25327	3.85576	3.45826	3.06076	2.66326	2.26576	1.86826	1.47076	1.07325
Output in Mt crude steel		5.317	5.49571	5.67442	5.85312	6.03183	6.21054	6.43392	6.65731	6.88069	7.10408	7.32746	7.55085	7.77423	7.99761	8.221	8.44438	8.78816	9.13194	9.47572	9.8195	10.1633	10.5071	10.8508	11.1946	11.5384	11.8822	12.226	12.5697	12.9135	13.2573	13.6011
Emission Intensity (tCO2/t crude steel)						1.4017	1.4017	1.32708	1.25747	1.19238	1.13139	1.07411	1.02023	0.969437	0.921484	0.876137	0.83319	0.755365	0.6834	0.616657	0.554587	0.496716	0.442632	0.391976	0.34443	0.299718	0.257593	0.217836	0.180255	0.144674	0.110939	0.0789095
Py starting in 2024						1	1	0.943592	0.89097	0.841765	0.795654	0.752355	0.711618	0.673221	0.63697	0.602689	0.570221	0.511387	0.456983	0.406527	0.359603	0.315854	0.274967	0.236672	0.200728	0.166927	0.135081	0.105026	0.0766152	0.0497171	0.0242139	0
Yearly growth physical output			1.03361	1.03252	1.03149	1.03053	1.02963	1.03597	1.03472	1.03355	1.03247	1.03144	1.03049	1.02958	1.02873	1.02793	1.02717	1.04071	1.03912	1.03765	1.03628	1.03501	1.03383	1.03272	1.03168	1.03071	1.02979	1.02893	1.02812	1.02735	1.02662	1.02593
Raw data
	2020	2025	2030	2035	2040	2045	2050	Sources
Iron and Steel - Emissions in Mt CO2-e		9.93461	11.8573	12.8879	11.3179	9.41699	2.11155	Figure 21
Iron and Steel - Production in Mt			7.32746	8.44438	9.56131	10.6782	11.7952	Figure 18
		2025	2035	2050	Source (2020 & 2025)	Source (2045 & 2050)
Output - Iron & Steel Manufacturing	5.317	6.21054	8.69475	13.6011	CSIRO Modelling (A50/G2)	Australia's Treasury Net Zero Modelling (2025). https://treasury.gov.au/sites/default/files/2025-09/p2025-700922.pdf
Graphical analysis - Emission	Reference	2025	2035	2050
Cm	11.74	1.46	1.18	0.18
Emissions in Mt CO2e	70	8.70528	7.03578	1.07325
Intensity of 2025 is used as a proxy for the intensity in 2024

## Sheet: AUS_CSIRO
Key indicators		Iron & Steel (A40/1.5)
Year		2020	2021	2022	2023	2024	2025	2026	2027	2028	2029	2030	2031	2032	2033	2034	2035	2036	2037	2038	2039	2040	2041	2042	2043	2044	2045	2046	2047	2048	2049	2050
Emissions in MtCO2						9.64874	9.93461	10.6945	11.4545	12.2144	12.9744	13.7343	13.714	13.6938	13.6735	13.6533	13.633	11.3261	9.0192	6.7123	4.4054	2.09849	2.16532	2.23215	2.29897	2.3658	2.43263	2.49063	2.54863	2.60664	2.66464	2.72264
Output in Mt crude steel		5.317	5.49571	5.67442	5.85312	6.03183	6.21054	6.6467	7.08287	7.51904	7.9552	8.39137	8.73297	9.07456	9.41616	9.75776	10.0994	10.441	10.7825	11.1241	11.4657	11.8073	12.1489	12.4905	12.8321	13.1737	13.5153	13.8569	14.1985	14.5401	14.8817	15.2233
Emission Intensity (tCO2/t crude steel)						1.59964	1.59964	1.609	1.61721	1.62447	1.63093	1.63672	1.57038	1.50903	1.45213	1.39922	1.34989	1.08478	0.836463	0.603399	0.384223	0.177728	0.178231	0.178707	0.179158	0.179585	0.17999	0.179739	0.1795	0.179272	0.179055	0.178847
Py starting in 2025						1	1	1.00659	1.01237	1.01748	1.02202	1.0261	0.979405	0.936227	0.896182	0.858941	0.824219	0.637624	0.462852	0.298814	0.14455	-0.000787794	-0.000433485	-9.85551e-05	0.000218543	0.000519196	0.000804651	0.000627852	0.00045956	0.000299176	0.000146154	0
Yearly growth physical output			1.03361	1.03252	1.03149	1.03053	1.02963	1.07023	1.06562	1.06158	1.05801	1.05483	1.04071	1.03912	1.03764	1.03628	1.03501	1.03382	1.03272	1.03168	1.03071	1.02979	1.02893	1.02812	1.02735	1.02662	1.02593	1.02527	1.02465	1.02406	1.02349	1.02295
Intensity of 2025 is used as a proxy for the intensity in 2024
Raw data		A50/G2								Raw data	A40/G1.5
	2020	2025	2030	2035	2040	2045	2050	Sources			2020	2025	2030	2035	2040	2045	2050	Sources
Iron and Steel - Emissions in Mt CO2-e		9.93461	11.8573	12.8879	11.3179	9.41699	2.11155	Figure 21		Iron and Steel - Emissions in Mt CO2-e		9.93461	13.7343	13.633	2.09849	2.43263	2.72264	Figure 21
Iron and Steel - Production in Mt	5.317	6.21054	7.32746	8.44438	9.56131	10.6782	11.7952	Figure 18		Iron and Steel - Production in Mt	5.317	6.21054	8.39137	10.0994	11.8073	13.5153	15.2233	Figure 18

## Sheet: Global_IEA
Key indicators
Year		2020	2021	2022	2023	2024	2025	2026	2027	2028	2029	2030	2031	2032	2033	2034	2035	2036	2037	2038	2039	2040	2041	2042	2043	2044	2045	2046	2047	2048	2049	2050
Emissions in MtCO2		2507	2618.5	2730	2761	2759.43	2757.86	2756.29	2754.71	2753.14	2751.57	2750	2667.3	2584.6	2501.9	2419.2	2336.5	2253.8	2171.1	2088.4	2005.7	1923	1853.1	1783.2	1713.3	1643.4	1573.5	1503.6	1433.7	1363.8	1293.9	1224
Output in Mt crude steel		1869	1879.5	1890	1903	1900.14	1897.29	1894.43	1891.57	1888.71	1885.86	1883	1889.3	1895.6	1901.9	1908.2	1914.5	1920.8	1927.1	1933.4	1939.7	1946	1945.8	1945.6	1945.4	1945.2	1945	1944.8	1944.6	1944.4	1944.2	1944
Emission Intensity (tCO2/t crude steel)		1.34136	1.39319	1.44444	1.45087	1.45222	1.45358	1.45494	1.45631	1.45768	1.45906	1.46044	1.41179	1.36347	1.31547	1.26779	1.22042	1.17337	1.12662	1.08017	1.03403	0.988181	0.952359	0.91653	0.880693	0.844849	0.808997	0.773139	0.737272	0.701399	0.665518	0.62963
Py (2025-2050)						1	1.00165	1.00331	1.00497	1.00664	1.00831	1.00999	0.950852	0.892111	0.83376	0.775794	0.71821	0.661003	0.60417	0.547708	0.491612	0.43588	0.392332	0.348776	0.30521	0.261635	0.218052	0.17446	0.130858	0.0872477	0.0436283	0
Py (2020-2030)		1	0.564728	0.134292	0.0803553	0.0689795	0.0575695	0.0461251	0.034646	0.0231323	0.0115837	0
Yearly growth physical output			1.00562	1.00559	1.00688	0.998499	0.998496	0.998494	0.998492	0.99849	0.998487	0.998485	1.00335	1.00333	1.00332	1.00331	1.0033	1.00329	1.00328	1.00327	1.00326	1.00325	0.999897	0.999897	0.999897	0.999897	0.999897	0.999897	0.999897	0.999897	0.999897	0.999897
Raw Data
	2022	2023	2024	2035	2040	2050	Source	Source
Emissions in MtCO2	2730	2761	2750	1923	1224	216	Table A.4.c p312, World Energy Outlook (2024)	Table A.4.c p430, World Energy Outlook (2025)
Production	1890	1903	1883	1946	1944	1917	Table A.5.c p313, World Energy Outlook (2024)	Table A.5.c p431, World Energy Outlook (2025)
	2020	Source
Emissions	2507	Table A.5, Net Zero by 2050 (2021)
Production	1869

## Sheet: Lists
1	2	3	4	5	6	7	8	9	10	11	12	13	14	15	16	17	18	19	20	21	22	23	24	25	26	27	28	29	30	31	32	33	34	35	36	37	38	39	40	41	42	43	44	45	46	47	48	49	50
2
3
4
5
6
7
8
9
10
[truncated: 135 more columns]
